# Supplementary material for: Large extracellular vesicles containing mitochondria (EVMs) derived from Alzheimer’s disease cells harbor pathologic functional and molecular profiles and spread mitochondrial dysfunctions
Source: Research Square preprint supplement (doi:10.21203/rs.3.rs-5932075/v1), 2025-02-13
Supplement: Supplementary file 1 [file 394d804c9e9136708bbb0a1e.xlsx]

## Sheet: Heatmap prot MITO
																			EVMs APPswe				EVMs CTRL
Protein Group	Accession	Gene	Description	#Peptides DB	#Peptides LFQ	#Unique DB	#Unique LFQ	Avg. Mass	Coverage (%)	-10LgP	MitoCarta3.0_SubMitoLocalization	PTM	TrainingDataset	p-value	q-value	Fold change	-Log10(p)	Log2(FC)	EVMs_SH_APPswe_1 Area	EVMs_SH_APPswe_3 Area	EVMs_SH_APPswe_2 Area	EVMs_SH_APPswe_4 Area	EVMs_SH_CTRL_1 Area	EVMs_SH_CTRL_2 Area	EVMs_SH_APPswe_3 Area	EVMs_SH_APPswe_4 Area
1067	P11177	PDHB	pyruvate dehydrogenase E1 subunit beta	12	12	12	12	39233	43.73	348.234	Matrix	Carbamidomethylation; Deamidation (NQ); Oxidation (M)	Tmito	9.46246e-06	0.00407832	6.55472	5.024	2.71253	7828500	6177230	5307270	4903210	922903	950710	708676	1096370
950	P08559	PDHA1	pyruvate dehydrogenase E1 subunit alpha 1	18	18	18	18	43296	43.08	399.888	Matrix	Carbamidomethylation; Deamidation (NQ); Oxidation (M)	Tmito	3.51114e-05	0.00413842	5.96005	4.45455	2.57533	10300000	9798550	7134550	12400000	1272170	1830620	2125800	1429280
3685	Q7L3T8	PARS2	prolyl-tRNA synthetase 2, mitochondrial	3	3	3	3	53263	12	152.186	Matrix	Carbamidomethylation	Tmito	0.00516678	0.0716511	3.76528	2.28678	1.91276	157927	248729	110365	275595	56704.4	61916.6	25304.4	66907.5
916	Q13162	PRDX4	peroxiredoxin 4	18	18	15	15	30540	63.1	396.9	IMS	Carbamidomethylation	Tmito	0.000550649	0.02637	2.8454	3.25913	1.50863	50900000	32000000	46300000	28800000	11300000	15600000	12700000	14800000
2522	Q9Y2Q3	GSTK1	glutathione S-transferase kappa 1	5	5	5	5	25497	27.43	260.806	Matrix	Oxidation (M)	Tmito	0.00274583	0.0485033	2.79553	2.56133	1.48312	4839380	2837220	4087810	2648920	1024310	1861720	948248	1346230
2201	P22307	SCP2	sterol carrier protein 2	8	7	8	7	58994	9.69	293.214	MIM	Oxidation (M)	Tpossible_mito	0.00205012	0.0448667	2.75647	2.68822	1.46282	4256750	2888930	3746670	2895480	803877	1113210	1480660	1743990
2273	Q16774	GUK1	guanylate kinase 1	8	8	8	8	21726	64.47	290.738	Matrix	Acetylation (Protein N-term); Carbamidomethylation	Tmito	0.00137493	0.0395063	2.67663	2.86172	1.42042	1199140	1116950	1228780	804313	554907	273077	416092	409030
2360	O43181	NDUFS4	NADH:ubiquinone oxidoreductase subunit S4	6	6	6	6	20108	29.14	259.775	MIM	Deamidation (NQ)	Tmito	0.000744084	0.0291546	2.61416	3.12838	1.38635	3401480	2662530	4430570	2502910	1374930	1216900	966647	1329640
2268	O43169	CYB5B	cytochrome b5 type B	8	8	8	8	16695	63.33	309.227	MOM	N/A	Tmito	0.00108867	0.0371945	2.50412	2.9631	1.32431	5241080	7221280	8931780	5760850	1967270	2866440	3083530	2848270
853	O94925	GLS	glutaminase	17	16	17	16	73461	32.44	398.422	MIM	Carbamidomethylation; Oxidation (M)	Tmito	0.00112187	0.0371945	2.43434	2.95006	1.28353	10800000	10100000	7410660	8565710	3120760	5343140	3116040	3794730
2841	Q6P1X6	C8orf82	chromosome 8 open reading frame 82	4	4	4	4	23889	25.46	230.435	Matrix	Carbamidomethylation; Oxidation (M)	Tmito	0.000487118	0.0262435	2.39571	3.31237	1.26045	1250160	1131000	1022440	936392	449447	474434	335079	575160
2217	Q5JPH6	EARS2	glutamyl-tRNA synthetase 2, mitochondrial	8	8	8	8	58689	19.5	286.836	Matrix	N/A	Tmito	0.00134697	0.0395063	2.34546	2.87064	1.22987	2113660	2156820	2363740	1733820	973500	1241200	666887	766146
1094	P00387	CYB5R3	cytochrome b5 reductase 3	14	14	14	14	34235	57.81	372.317	MOM	Carbamidomethylation; Oxidation (M)	Tmito	5.47763e-05	0.00472172	2.34053	4.26141	1.22684	9515900	9094970	8421300	7916110	3207920	4158330	3359040	4290690
1442	Q9H5Q4	TFB2M	transcription factor B2, mitochondrial	13	13	13	13	45349	29.29	343.426	Matrix	Carbamidomethylation; Oxidation (M)	Tmito	3.60499e-05	0.00413842	2.27522	4.4431	1.18601	3153510	3349080	2643200	3508690	1365420	1379300	1548240	1253540
481	P49419	ALDH7A1	aldehyde dehydrogenase 7 family member A1	27	26	27	26	58487	52.69	445.082	Matrix	Carbamidomethylation; Oxidation (M)	Tmito	0.00181909	0.0448667	2.20616	2.74014	1.14154	16000000	15700000	9668450	11700000	6725150	6786600	4727120	5559810
2113	P09110	ACAA1	acetyl-CoA acyltransferase 1	9	9	9	9	44292	29.95	325.535	unknown	Carbamidomethylation	Tpossible_mito	0.0053198	0.0716511	2.17339	2.2741	1.11994	2414290	1778210	1844110	1404450	988231	679076	639563	1161070
1558	O15091	PRORP	protein only RNase P catalytic subunit	12	12	12	12	67315	21.27	336.922	Matrix	Carbamidomethylation	Tmito	0.00292595	0.0485033	2.13628	2.53373	1.0951	1358490	1761770	1113970	1790140	612490	914275	557768	733683
3113	Q9UH62	ARMCX3	armadillo repeat containing X-linked 3	4	4	4	4	42501	13.46	198.311	MOM	N/A	Tpossible_mito	0.000473856	0.0262435	2.10797	3.32435	1.07585	501656	451724	369888	355679	160066	205505	206372	222421
3880	Q96IX5	ATP5MK	ATP synthase membrane subunit DAPIT	3	3	3	3	6458	44.83	213.774	MIM	N/A	Tmito	0.00702853	0.0808312	2.0797	2.15314	1.05638	1841570	835427	1468720	1562370	555114	660621	738996	696373
2187	P21953	BCKDHB	branched chain keto acid dehydrogenase E1 subunit beta	7	7	7	7	43122	23.47	293.027	MIM	Carbamidomethylation; Oxidation (M)	Tmito	0.00794569	0.087248	2.07584	2.09987	1.0537	762428	1251630	970551	1386970	390636	657850	431818	623418
930	P23919	DTYMK	deoxythymidylate kinase	18	18	18	18	23819	67.92	397.565	Matrix	Carbamidomethylation; Deamidation (NQ)	Tpossible_mito	0.00203799	0.0448667	2.05783	2.6908	1.04112	19800000	18400000	13700000	16200000	6867190	9265890	6685120	10600000
1280	P11310	ACADM	acyl-CoA dehydrogenase medium chain	15	14	15	14	46588	32.54	379.945	Matrix	N/A	Tmito	0.00208198	0.0448667	1.98326	2.68152	0.987873	14100000	15700000	10800000	12700000	5846250	8741320	5446890	7050600
845	Q96AY3	FKBP10	FKBP prolyl isomerase 10	17	17	16	16	64245	30.76	376.047	IMS	Carbamidomethylation; Oxidation (M)	Tmito	0.00314181	0.0497127	1.95739	2.50282	0.96893	9081790	8141940	9320000	6734000	4534410	5744230	3513100	3454920
1401	Q9BRX8	PRXL2A	peroxiredoxin like 2A	13	13	13	13	25764	43.23	359.021	Membrane	Oxidation (M)	Tmito	3.84076e-05	0.00413842	1.94509	4.41558	0.95984	7619000	6573420	7063350	7224580	3459970	4041590	3228120	3955270
1184	P50213	IDH3A	isocitrate dehydrogenase (NAD(+)) 3 catalytic subunit alpha	14	14	14	14	39592	38.25	370.667	Matrix	Carbamidomethylation; Oxidation (M)	Tmito	0.00258129	0.0485033	1.90541	2.58816	0.930105	5984610	6552990	4510290	5268190	2491450	3895830	2578220	2824960
2073	Q96DV4	MRPL38	mitochondrial ribosomal protein L38	9	9	9	9	44597	28.95	310.587	Matrix	Carbamidomethylation	Tmito	0.00587666	0.0767527	1.89848	2.23087	0.924843	5965810	6691780	4140260	6094750	2539960	4106700	2873440	2587330
849	O96008	TOMM40	translocase of outer mitochondrial membrane 40	14	14	14	14	37893	48.2	355.83	MOM	Carbamidomethylation; Deamidation (NQ); Oxidation (M)	Tmito	0.00028748	0.0206507	1.88398	3.54139	0.913781	10600000	13500000	9399360	11200000	5941220	6302520	5284170	6043490
490	Q9NSE4	IARS2	isoleucyl-tRNA synthetase 2, mitochondrial	29	29	29	29	113792	34.88	453.875	Matrix	Carbamidomethylation; Oxidation (M)	Tmito	0.00610747	0.0768382	1.83911	2.21414	0.879006	12400000	15800000	9428930	12400000	5726540	8626740	5596790	7241930
155	P51659	HSD17B4	hydroxysteroid 17-beta dehydrogenase 4	43	42	43	42	79686	62.09	501.457	unknown	Carbamidomethylation; Deamidation (NQ); Oxidation (M)	Tpossible_mito	0.00978232	0.0932364	1.83086	2.00956	0.87252	33400000	23400000	25000000	28300000	12400000	17700000	11100000	20200000
1692	Q9H7Z7	PTGES2	prostaglandin E synthase 2	11	11	11	11	41943	32.36	345.469	MIM	Carbamidomethylation	Tmito	0.0032296	0.0497127	1.80147	2.49085	0.849175	1898480	1875310	1532700	1646920	701216	1043920	975883	1194500
3173	A8MXV4	NUDT19	nudix hydrolase 19	4	3	4	3	42233	9.6	231.157	Matrix	N/A	Tmito	0.0035564	0.0528555	1.79145	2.44899	0.841127	711207	658076	608079	820222	312282	509285	342990	415485
1112	Q9P2R7	SUCLA2	succinate-CoA ligase ADP-forming subunit beta	17	16	17	16	50317	40.39	381.667	Matrix	Carbamidomethylation	Tmito	0.00623976	0.0768382	1.78584	2.20483	0.836606	6456710	5497670	4623160	5003970	2829360	3360700	2199500	3860360
3810	O75127	PTCD1	pentatricopeptide repeat domain 1	3	3	3	3	78856	5.86	178.977	Matrix	Carbamidomethylation	Tpossible_mito	0.00065106	0.0280607	1.78044	3.18638	0.832238	143996	185916	157176	158780	75531.3	85618.7	100682	102114
961	Q9BWM7	SFXN3	sideroflexin 3	15	14	13	13	35503	48.91	381.852	MIM	Acetylation (Protein N-term); Deamidation (NQ); Oxidation (M)	Tpossible_mito	0.00918623	0.0902339	1.73804	2.03686	0.797459	6033490	5110270	3691280	4584810	2716920	3379030	2075390	3001270
591	Q7L0Y3	TRMT10C	tRNA methyltransferase 10C, mitochondrial RNase P subunit	24	24	24	24	47347	60.79	419.356	Matrix	Carbamidomethylation; Oxidation (M)	Tmito	0.0028356	0.0485033	1.72893	2.54736	0.789879	17200000	15100000	15100000	12900000	7293920	8789290	7815720	11300000
1914	P21912	SDHB	succinate dehydrogenase complex iron sulfur subunit B	10	10	10	10	31630	31.79	316.383	MIM	Carbamidomethylation	Tmito	0.00995098	0.0932364	1.54614	2.00213	0.628675	10100000	9975220	6678770	7359970	5044040	5933360	4888850	5922870
873	Q02252	ALDH6A1	aldehyde dehydrogenase 6 family member A1	20	20	20	20	57840	36.64	397.816	MIM	Carbamidomethylation; Oxidation (M)	Tmito	0.00272665	0.0485033	1.49312	2.56437	0.578326	5421940	4855140	3758100	4533490	3240630	3005630	2881170	3215500
309	P11498	PC	pyruvate carboxylase	35	34	35	34	129634	36.33	477.975	Matrix	Carbamidomethylation; Deamidation (NQ); Oxidation (M)	Tmito	0.00505335	0.0716511	1.45846	2.29642	0.544446	8263590	8914040	8084790	8197300	5207880	6276020	4772000	6917660
1835	O96011	PEX11B	peroxisomal biogenesis factor 11 beta	10	10	10	10	28431	39	334.374	Membrane	Carbamidomethylation	Tpossible_mito	0.00676511	0.0808312	1.4312	2.16973	0.517227	3400720	2523020	2855250	2461380	2214750	1926240	1745430	1930060
790	O60313	OPA1	OPA1 mitochondrial dynamin like GTPase	21	21	21	21	111631	23.23	401.714	MIM	Carbamidomethylation	Tmito	0.00206404	0.0448667	0.602863	2.68528	-0.730098	3258510	3409840	2734110	2448890	4131460	4975150	5518720	4964960
1441	Q9ULD0	OGDHL	oxoglutarate dehydrogenase L	13	13	3	3	114481	2.57	344.153	Matrix	Carbamidomethylation	Tmito	0.00240583	0.0485033	0.572007	2.61873	-0.805895	642514	575702	432233	453258	906143	822332	850467	1068160
1713	P80404	ABAT	4-aminobutyrate aminotransferase	11	11	11	11	56439	29.4	324.304	Matrix	Carbamidomethylation	Tmito	0.00820324	0.087248	0.560975	2.08601	-0.833992	733856	621850	695347	754768	1297170	1831250	955298	1065750
1380	P21397	MAOA	monoamine oxidase A	14	14	14	14	59682	29.6	335.382	MOM	Carbamidomethylation; Oxidation (M)	Tmito	0.00712665	0.0808312	0.431977	2.14711	-1.21097	2723650	1650970	3271880	2865830	5174050	6311530	4319630	8583910
3469	O75608	LYPLA1	lysophospholipase 1	3	3	3	3	24670	16.52	187.247	unknown	Carbamidomethylation	Tpossible_mito	0.00921181	0.0902339	0.410091	2.03565	-1.28598	243112	383169	151557	172859	715648	592760	461562	440693
1045	P32119	PRDX2	peroxiredoxin 2	17	17	16	16	21892	59.6	388.349	unknown	Carbamidomethylation	Tmito	0.0082997	0.087248	0.353715	2.08094	-1.49934	20300000	10800000	19600000	7653160	44500000	46100000	26600000	38500000
