# Supplementary material for: Large extracellular vesicles containing mitochondria (EVMs) derived from Alzheimer’s disease cells harbor pathologic functional and molecular profiles and spread mitochondrial dysfunctions
Source: Research Square preprint supplement (doi:10.21203/rs.3.rs-5932075/v1), 2025-02-13
Supplement: Supplementary file 2 [file 4b2b655c17832caae41aa163.xlsx]

## Sheet: Filtre pValue<0,05
																			AD	AD	AD	AD	MCI	MCI	MCI	MCI	MCI	MCI
Protein Group	Accession	Gene	Description	#Peptides DB	#Peptides LFQ	#Unique DB	#Unique LFQ	Avg. Mass	Coverage (%)	-10LgP	MitoPathway	PTM	Taxonomia	Training Data set	p-value	q-value	Fold change	Log2(FC)	AD-117 Area	AD-119 Area	AD-88 Area	AD-99 Area	MCI-027 Area	MCI-042 Area	MCI-058 Area	MCI-064 Area	MCI-73 Area	MCI-82 Area
686	P01023	AOC3	Membrane primary amine oxidase	2	1	2	1	84622	1.18	68.9693	N/A	N/A	Homo sapiens	N/A	0.00547559	0.84955	3079.05	11.5883	103482	0	38384.7	22627.9	0	0	0	0	0	0
2196	Q2M2I8	IGFBP1	Insulin-like growth factor-binding protein 1	1	1	1	1	27904	3.09	53.5867	N/A	Carbamidomethylation	Homo sapiens	N/A	0.0397559	0.84955	2619.29	11.355	374610	217389	67074.8	88309.7	0	0	0	120103	0	273161
191	P49588	PTMS	Parathymosin	2	2	2	2	11530	22.55	75.7105	N/A	N/A	Homo sapiens	N/A	0.0492819	0.84955	843.511	9.72026	361697	107421	19411.6	325290	9162.56	0	0	6104.66	0	190733
1708	Q9NRN7	PLOD2	Procollagen-lysine,2-oxoglutarate 5-dioxygenase 2	12	11	12	11	84686	21.98	213.634	N/A	Carbamidomethylation	Homo sapiens	N/A	0.0375571	0.84955	35.3555	5.14386	173000000	440000000	219000000	261000000	216000000	295000000	757150	1151910	2940160	899254
2986	P80404	AK3	GTP:AMP phosphotransferase AK3, mitochondrial	7	7	7	7	25565	37.89	153.833	Metabolism > Nucleotide metabolism > Nucleotide synthesis and processing	Deamidation (NQ)	Homo sapiens	Tmito	0.010353	0.84955	16.0919	4.00826	30300000	52300000	82500000	886705	743228	1349610	794991	1131350	1564930	1610070
2947	P08183	DGKE	Diacylglycerol kinase epsilon	1	1	1	1	63927	1.06	42.7593	N/A	Deamidation (NQ)	Homo sapiens	N/A	0.0241725	0.84955	4.21807	2.07658	1337020	172492	93040.5	106676	52576.4	76340.5	29563.3	41858.5	58318	67128.5
267	P33527	SET	Protein SET	7	7	7	7	33489	33.79	172.064	N/A	Deamidation (NQ)	Homo sapiens	N/A	0.00151005	0.84955	3.64947	1.86769	5052870	6983850	4558950	5523180	1275200	1121950	993491	1614440	1192680	4096260
1039	O15439	WNK3	Serine/threonine-protein kinase WNK3	1	1	1	1	198416	0.39	44.9916	N/A	N/A	Homo sapiens	N/A	0.0249876	0.84955	3.6394	1.8637	1447340	149426	1418790	465276	159476	305270	171697	195073	94978.2	149897
2699	P28288	VGF	Neurosecretory protein VGF	20	20	20	20	67258	43.58	288.918	N/A	Deamidation (NQ)	Homo sapiens	N/A	0.00571321	0.84955	3.3309	1.73591	5002400	5919680	6263340	6814210	1565550	3939290	2074970	683087	2919740	1289020
868	P61221	TPM2	Tropomyosin beta chain	14	12	2	2	32851	7.39	193.261	N/A	N/A	Homo sapiens	N/A	0.0328546	0.84955	3.03112	1.59985	26963.5	112808	67099.5	56104	12667.4	70875.3	9214.15	14423	20044.4	20890
1745	Q8NE71	SNRNP70	U1 small nuclear ribonucleoprotein 70 kDa	5	4	5	4	51557	9.61	113.989	N/A	N/A	Homo sapiens	N/A	0.0247881	0.84955	2.77726	1.47366	599381	461298	433251	425857	333260	203919	109161	79562.7	94246.9	451382
2154	Q9UG63	BIN2	Bridging integrator 2	2	2	2	2	61874	4.42	80.7318	N/A	Carbamidomethylation	Homo sapiens	N/A	0.00984822	0.84955	2.75871	1.46399	95437.6	118712	127238	88612.9	32367.4	59134.9	16620.9	29264.5	86654	40599.7
1575	Q8N2K0	HMGB1	High mobility group protein B1	13	13	11	11	24894	42.79	217.025	N/A	Carbamidomethylation; Deamidation (NQ); Oxidation (M)	Homo sapiens	N/A	0.0189364	0.84955	2.45442	1.29538	14200000	13800000	8047750	5176840	2959620	4380430	2520620	3471970	3174920	9366880
1222	Q96IU4	BTF3	Transcription factor BTF3	3	3	3	3	22168	33.5	146.197	N/A	N/A	Homo sapiens	N/A	0.0156849	0.84955	2.42418	1.2775	1349750	948703	2271360	794322	380572	723441	710040	250931	473813	744439
1193	Q8IZP0	PDAP1	28 kDa heat- and acid-stable phosphoprotein	5	5	5	5	20630	22.65	138.156	N/A	N/A	Homo sapiens	N/A	0.026888	0.84955	2.37198	1.24609	501302	739613	257090	205504	120846	180430	126684	163171	101420	336760
1963	Q9NYB9	SNRPD1	Small nuclear ribonucleoprotein Sm D1	2	2	2	2	13282	10.92	79.4787	N/A	N/A	Homo sapiens	N/A	0.012309	0.84955	2.31564	1.21141	990763	613734	520049	1011550	404583	378454	649456	237789	253815	195511
3113	O94929	NDNF	Protein NDNF	22	22	22	22	64673	49.47	274.42	N/A	Carbamidomethylation; Deamidation (NQ); Oxidation (M)	Homo sapiens	N/A	0.00211756	0.84955	2.2406	1.16388	2362570	1269940	1493370	2460850	878333	1095230	712047	962329	805814	544771
1849	Q15018	CHGA	Chromogranin-A	13	13	13	13	50688	39.39	222.477	N/A	Oxidation (M)	Homo sapiens	N/A	0.0314035	0.84955	2.23497	1.16025	5813270	3302230	9233420	2397670	1866030	3234480	2033830	1027910	2634740	2114520
1341	P09110	LUC7L3	Luc7-like protein 3	2	2	2	2	51466	7.41	99.5661	N/A	N/A	Homo sapiens	N/A	0.0386117	0.84955	2.21275	1.14584	59279	44547.7	43437.1	45887.3	21167.4	20581.9	71512.2	18344.4	14055.3	12807.2
606	P42765	NCL	Nucleolin	23	23	23	23	76614	32.54	251.332	N/A	Deamidation (NQ); Oxidation (M)	Homo sapiens	N/A	0.0261917	0.84955	2.11106	1.07797	21500000	9573430	6419470	6693010	3573930	4854230	4648780	3780730	3698400	8331760
1779	Q9H845	SNRPD3	Small nuclear ribonucleoprotein Sm D3	1	1	1	1	13916	7.94	49.5966	N/A	N/A	Homo sapiens	N/A	0.00672329	0.84955	2.10356	1.07283	683774	413186	343737	701357	295184	291380	346994	198347	214128	161859
2239	P11310	EIF3H	Eukaryotic translation initiation factor 3 subunit H	2	2	2	2	39930	7.95	115.882	N/A	N/A	Homo sapiens	N/A	0.0133327	0.84955	1.88217	0.912395	239462	356228	660322	526980	247325	265050	207327	263691	179327	178991
367	P49748	TF	Serotransferrin	29	27	29	27	77050	43.12	285.301	N/A	Carbamidomethylation; Deamidation (NQ); Oxidation (M)	Homo sapiens	N/A	0.0402923	0.84955	1.85109	0.888374	14400000	9476770	5570000	10800000	7617990	8096320	3069460	3671130	5383880	4940880
1483	P16112	SERBP1	Plasminogen activator inhibitor 1 RNA-binding protein	5	5	5	5	44965	15.2	144.751	N/A	Carbamidomethylation	Homo sapiens	N/A	0.024262	0.84955	1.80234	0.849872	1302450	1466290	1081750	1184860	427547	1105770	1016990	864234	506264	531089
727	P24752	SERPINB8	Serpin B8	5	5	3	3	42767	10.16	123.157	N/A	N/A	Homo sapiens	N/A	0.0241271	0.84955	1.7932	0.842535	62521.4	111243	85443.9	156902	40057.2	65691.5	38755	70585	52222.7	72037.5
1047	Q9BWD1	RPL35A	60S ribosomal protein L35a	5	5	5	5	12538	38.18	109.573	N/A	Carbamidomethylation	Homo sapiens	N/A	0.0191805	0.84955	1.45929	0.545271	2251090	1848820	1540890	1674680	919840	1537650	1551970	1389580	1017570	1174160
931	P12821	RPS26	40S ribosomal protein S26	5	5	5	5	13015	50.43	138.908	N/A	Carbamidomethylation; Oxidation (M)	Homo sapiens	N/A	0.00879068	0.84955	1.41322	0.498984	5294600	5455440	4652720	6213470	3355650	4251580	4558610	4056400	2850480	4027940
134	P53396	GNB3	Guanine nucleotide-binding protein G(I)/G(S)/G(T) subunit beta-3	3	3	1	1	37221	3.82	104.892	N/A	Carbamidomethylation	Homo sapiens	N/A	0.00973488	0.84955	1.37198	0.456264	669353	695601	674384	700533	568666	506697	382874	586390	575316	415602
446	P21399	RPS16	40S ribosomal protein S16	9	9	9	9	16445	50	162.245	N/A	Deamidation (NQ)	Homo sapiens	N/A	0.0366981	0.84955	1.31052	0.39014	6617560	7840620	7010710	9328300	6523740	7369540	5093510	5852680	4491610	6061010
333	Q99798	RPL12	60S ribosomal protein L12	8	7	8	7	17819	59.39	186.558	N/A	Carbamidomethylation	Homo sapiens	N/A	0.0288319	0.84955	1.3025	0.381282	6874010	7825430	5982930	7630090	3907300	5862900	6073670	5213970	5575810	6161140
1739	Q86TX2	PFN1	Profilin-1	13	13	13	13	15054	91.43	262.48	N/A	Acetylation (Protein N-term); Carbamidomethylation; Deamidation (NQ); Oxidation (M)	Homo sapiens	N/A	0.0431732	0.84955	0.791761	-0.336863	29800000	47900000	42500000	45000000	43900000	52300000	50000000	55600000	49800000	57600000
2673	Q9NPJ3	ESD	S-formylglutathione hydrolase	15	14	15	14	31463	67.38	253.353	N/A	Carbamidomethylation; Deamidation (NQ); Oxidation (M)	Homo sapiens	N/A	0.0330086	0.84955	0.771431	-0.374392	2718360	3945190	3160800	2783300	3248780	4603650	3764140	3761130	4809690	4269640
1829	O00154	ATP5PO	ATP synthase subunit O, mitochondrial	10	10	10	10	23277	57.75	209.611	OXPHOS > Complex V > CV subunits | OXPHOS > OXPHOS subunits	Carbamidomethylation; Deamidation (NQ)	Homo sapiens	Tmito	0.019026	0.84955	0.723467	-0.467	5130370	7080260	6320490	6776250	8284090	6937720	10400000	9742800	10400000	7066100
1760	Q9Y305	ATP5PB	ATP synthase F(0) complex subunit B1, mitochondrial	7	7	7	7	28909	29.3	170.353	OXPHOS > Complex V > CV subunits | OXPHOS > OXPHOS subunits	N/A	Homo sapiens	Tmito	0.0456222	0.84955	0.705031	-0.504241	1035460	1282370	985163	1656110	1709280	1624080	1191870	1850750	1778130	2384560
2889	Q15067	SLC25A3	Phosphate carrier protein, mitochondrial	9	9	9	9	40095	19.61	169.305	Metabolism > Metals and cofactors > Copper metabolism | Signaling > Calcium homeostasis > Calcium cycle | Small molecule transport > SLC25A family	Oxidation (M)	Homo sapiens	Tmito	0.0401551	0.84955	0.684462	-0.546958	3221370	5328200	4852770	5867970	6736350	7842920	4549040	7946500	6542800	8409910
1782	P24666	PSMA6	Proteasome subunit alpha type-6	9	9	9	9	27399	39.43	178.711	N/A	Carbamidomethylation; Deamidation (NQ)	Homo sapiens	N/A	0.0240375	0.84955	0.682776	-0.550515	2998810	4007760	3373040	3536140	6135010	4476030	7413640	5170130	4350310	3699760
2116	O95573	WDFY1	WD repeat and FYVE domain-containing protein 1	2	2	2	2	46324	7.32	89.5624	N/A	Carbamidomethylation; Deamidation (NQ)	Homo sapiens	N/A	0.00203768	0.84955	0.681388	-0.553451	375363	455370	543701	418744	525263	724152	649350	707742	684103	641412
1153	O60488	IMMT	MICOS complex subunit MIC60	27	27	27	27	83678	39.97	244.343	Mitochondrial dynamics and surveillance > Cristae formation > MICOS complex	N/A	Homo sapiens	Tmito	0.0381679	0.84955	0.668417	-0.58118	3905770	5879810	4360860	4228040	6804360	5137010	4747340	6795960	8813830	9829270
2120	Q9NR19	CYB5R1	NADH-cytochrome b5 reductase 1	10	9	10	9	34095	33.44	207.52	N/A	Carbamidomethylation	Homo sapiens	N/A	0.0470481	0.84955	0.661647	-0.595866	980101	1384570	900484	1187280	1099600	1335100	1435060	1862380	2526760	2100930
72	P62736	ACOT7	Cytosolic acyl coenzyme A thioester hydrolase	4	3	4	3	41796	10.26	123.211	Metabolism > Lipid metabolism	Oxidation (M)	Homo sapiens	Tpossible_mito	0.0498001	0.84955	0.654491	-0.611555	338908	420207	334792	465914	514640	1021640	508870	731990	388275	553944
50	P60709	PDHB	Pyruvate dehydrogenase E1 component subunit beta, mitochondrial	5	5	5	5	39233	17.27	137.852	Metabolism > Carbohydrate metabolism > Pyruvate metabolism	Oxidation (M)	Homo sapiens	Tmito	0.0142787	0.84955	0.640997	-0.641611	380335	608813	410625	475821	692956	609785	508012	899821	794266	904263
301	Q562R1	NDUFS7	NADH dehydrogenase [ubiquinone] iron-sulfur protein 7, mitochondrial	2	2	2	2	23564	10.8	74.513	OXPHOS > Complex I > CI subunits | Metabolism > Metals and cofactors > Fe-S-containing proteins | OXPHOS > OXPHOS subunits	Oxidation (M)	Homo sapiens	Tmito	0.0143558	0.84955	0.637519	-0.64946	100717	91913.6	102396	170994	172393	197564	167233	237709	161243	140794
71	P68032	SPCS3	Signal peptidase complex subunit 3	3	3	3	3	20313	17.78	98.5218	N/A	N/A	Homo sapiens	N/A	0.047654	0.84955	0.63131	-0.66358	511789	546500	376563	539624	614520	731014	439812	909694	1005370	1184430
44	P63261	VKORC1L1	Vitamin K epoxide reductase complex subunit 1-like protein 1	1	1	1	1	19836	6.25	56.0691	N/A	N/A	Homo sapiens	N/A	0.0456502	0.84955	0.608212	-0.717353	52998.2	95852.6	47660.1	50832.4	62039.1	131742	67313.1	107905	113129	127000
32	P12814	SLC25A6	ADP/ATP translocase 3	16	14	3	3	32866	9.4	265.36	Metabolism > Nucleotide metabolism > Nucleotide import | Signaling > Calcium homeostasis > Mitochondrial permeability transition pore | Small molecule transport > SLC25A family	Acetylation (Protein N-term)	Homo sapiens	Tmito	0.00579041	0.84955	0.597434	-0.743149	1577670	1989550	1592240	1937890	3481110	3668900	2012020	3467550	2293250	3243870
22	O43707	PDHA1	Pyruvate dehydrogenase E1 component subunit alpha, somatic form, mitochondrial	5	4	5	4	43296	9.49	109.823	Metabolism > Carbohydrate metabolism > Pyruvate metabolism	N/A	Homo sapiens	Tmito	0.0375422	0.84955	0.596353	-0.745762	104225	222377	215667	216146	243588	239176	267537	507799	356556	279766
1730	Q9NZ32	COMP	Cartilage oligomeric matrix protein	13	12	10	9	82860	15.72	246.17	N/A	Carbamidomethylation	Homo sapiens	N/A	0.0455413	0.84955	0.596302	-0.745885	881639	1760600	1471360	1115480	1391300	1612140	1921080	3284770	1973010	3238900
461	P61163	CYB5R3	NADH-cytochrome b5 reductase 3	21	20	21	20	34235	78.74	341.205	Metabolism > Detoxification > Xenobiotic metabolism | Metabolism > Detoxification > Amidoxime reducing complex | Metabolism > Lipid metabolism	Carbamidomethylation; Deamidation (NQ); Oxidation (M)	Homo sapiens	Tmito	0.037955	0.84955	0.591354	-0.757905	22900000	45200000	27700000	39400000	35500000	64700000	38900000	53000000	77100000	76900000
652	P42025	VPS33A	Vacuolar protein sorting-associated protein 33A	2	2	2	2	67611	5.03	76.8194	N/A	Deamidation (NQ)	Homo sapiens	N/A	0.0345003	0.84955	0.590897	-0.759022	26316.3	73790.5	56072.1	60527.1	60502.7	88473.8	80120	88048.4	93665.4	112378
486	P61160	MGST3	Microsomal glutathione S-transferase 3	5	5	5	5	16516	34.21	185.263	Metabolism > Lipid metabolism > Eicosanoid metabolism	Carbamidomethylation; Deamidation (NQ); Oxidation (M)	Homo sapiens	Tmito	0.0328771	0.84955	0.590706	-0.759488	1020540	1792480	1830040	1109230	2539760	1925780	1389870	3185810	2407720	3230170
217	P61158	SFXN3	Sideroflexin-3	10	9	8	8	35503	35.51	190.321	Metabolism > Amino acid metabolism > Serine metabolism | Metabolism > Vitamin metabolism > Folate and 1-C metabolism | Small molecule transport > Sideroflexins	N/A	Homo sapiens	Tpossible_mito	0.0465325	0.84955	0.587775	-0.766664	769802	869610	631252	1228670	1421630	913127	2761960	1708070	1081330	1370080
2180	Q03154	NOMO2	Nodal modulator 2	9	8	9	8	139439	7.97	178.404	N/A	Carbamidomethylation; Deamidation (NQ)	Homo sapiens	N/A	0.0276949	0.84955	0.581438	-0.782303	679148	790597	879220	905372	1312230	1773560	860385	1194320	2587720	1168580
1019	P00813	DPM3	Dolichol-phosphate mannosyltransferase subunit 3	2	2	2	2	10094	23.91	58.5613	N/A	Carbamidomethylation	Homo sapiens	N/A	0.0153338	0.84955	0.581169	-0.78297	75140.6	92838.7	81599	102995	165899	112997	217357	101604	129127	217935
1454	O14672	TIMM50	Mitochondrial import inner membrane translocase subunit TIM50	1	1	1	1	39646	2.83	43.7814	Protein import, sorting and homeostasis > Protein import and sorting > TIM23 presequence pathway	N/A	Homo sapiens	Tmito	0.00713179	0.84955	0.570487	-0.809735	20221.1	44161.7	30729.2	34903.9	43547.1	45939.9	65935.8	62290.3	61660	53671.8
2461	Q13444	SPCS2	Signal peptidase complex subunit 2	4	3	4	3	25003	15.49	110.401	N/A	N/A	Homo sapiens	N/A	0.031882	0.84955	0.557734	-0.842351	297456	482853	483550	337907	516184	616336	413638	810430	922497	1214020
2212	P78536	DPP3	Dipeptidyl peptidase 3	15	14	15	14	82589	27.41	233.556	N/A	Acetylation (Protein N-term); Carbamidomethylation; Deamidation (NQ)	Homo sapiens	N/A	0.0116327	0.84955	0.553926	-0.852234	922187	1971860	1891270	1979450	3251580	1971120	3187100	3459540	2748370	3165780
1261	Q13443	CHCHD3	MICOS complex subunit MIC19	8	8	8	8	26152	35.24	182.411	Mitochondrial dynamics and surveillance > Cristae formation > MICOS complex | Mitochondrial dynamics and surveillance > Intramitochondrial membrane interactions	Carbamidomethylation	Homo sapiens	Tmito	0.018068	0.84955	0.553131	-0.854308	745522	928641	569823	1024000	1299300	1261530	826028	1713440	1893860	2040520
1028	Q9UHI8	GOLGA7	Golgin subfamily A member 7	4	4	4	4	15824	32.12	128.808	N/A	N/A	Homo sapiens	N/A	0.00790076	0.84955	0.551413	-0.858794	547279	596418	441907	367960	729214	763430	1479840	715507	746042	989136
1375	Q76LX8	NDRG3	Protein NDRG3	3	3	3	3	41409	13.07	85.1713	N/A	Carbamidomethylation	Homo sapiens	N/A	0.0429204	0.84955	0.550039	-0.862394	249984	550008	288784	358014	365944	404203	650978	769471	1030040	801946
2268	Q9UKP4	MTCH2	Mitochondrial carrier homolog 2	9	9	9	9	33331	39.6	201.219	Small molecule transport > SLC25A family | Mitochondrial dynamics and surveillance > Fusion	Carbamidomethylation; Deamidation (NQ)	Homo sapiens	Tmito	0.033856	0.84955	0.543528	-0.879573	1112010	2656570	1899630	1805840	3739870	3269050	1554050	3923580	4070380	4123580
1707	O60503	NDUFA8	NADH dehydrogenase [ubiquinone] 1 alpha subcomplex subunit 8	4	4	4	4	20105	25.58	106.771	OXPHOS > Complex I > CI subunits | OXPHOS > OXPHOS subunits	Carbamidomethylation	Homo sapiens	Tmito	0.0238951	0.84955	0.536715	-0.897771	268903	355577	231859	336657	498956	383163	504298	993157	803201	350726
690	P35611	SEC11A	Signal peptidase complex catalytic subunit SEC11A	1	1	1	1	20625	4.47	42.4878	N/A	N/A	Homo sapiens	N/A	0.0103465	0.84955	0.535464	-0.901138	123732	333276	220572	284634	374824	436648	333938	443664	468352	492096
1252	Q9UEY8	ERLIN2	Erlin-2	6	6	4	4	37840	16.22	173.714	N/A	N/A	Homo sapiens	N/A	0.0231781	0.84955	0.530009	-0.915911	286700	878779	468114	603581	732093	1107690	695826	1004880	1180450	1280110
1643	Q96PE1	HACD3	Very-long-chain (3R)-3-hydroxyacyl-CoA dehydratase 3	5	5	5	5	43160	16.85	131.38	N/A	N/A	Homo sapiens	N/A	0.00276839	0.84955	0.528752	-0.919338	448602	827385	521736	545813	930781	1495510	815083	1055230	1070740	1226640
1000	P48960	GALNT2	Polypeptide N-acetylgalactosaminyltransferase 2	5	5	5	5	64733	10.86	94.8715	N/A	N/A	Homo sapiens	N/A	0.0224084	0.84955	0.527961	-0.921496	128396	323074	214723	312261	363227	371285	296559	531229	482435	660760
2287	O95490	PEA15	Astrocytic phosphoprotein PEA-15	6	6	6	6	15040	44.62	148.138	N/A	N/A	Homo sapiens	N/A	0.0349029	0.84955	0.521317	-0.939768	134228	219664	303891	247799	207673	558321	321825	492691	417273	679426
857	P11766	CD55	Complement decay-accelerating factor	8	8	8	8	41400	24.67	145.091	N/A	Carbamidomethylation; Deamidation (NQ)	Homo sapiens	N/A	0.0420482	0.84955	0.519276	-0.945426	642123	2896490	1238870	1510200	2820300	2165720	1873930	2678640	3270680	3301680
2301	Q9BV57	DLAT	Dihydrolipoyllysine-residue acetyltransferase component of pyruvate dehydrogenase complex, mitochondrial	4	4	4	4	68997	7.11	108.953	Metabolism > Carbohydrate metabolism > Pyruvate metabolism	Carbamidomethylation	Homo sapiens	Tmito	0.0419785	0.84955	0.512586	-0.964135	121056	309130	134779	331117	343998	396935	210437	469060	516816	540173
713	P55263	PRDX4	Peroxiredoxin-4	14	14	11	11	30540	57.56	266.001	Metabolism > Detoxification > ROS and glutathione metabolism	Carbamidomethylation; Deamidation (NQ)	Homo sapiens	Tmito	0.00266821	0.84955	0.508222	-0.97647	6303440	7167960	7944580	5766240	10700000	8800070	12300000	18900000	14600000	17100000
932	Q9BRR6	ABHD12	Lysophosphatidylserine lipase ABHD12	5	5	5	5	45097	17.34	124.987	N/A	Carbamidomethylation	Homo sapiens	N/A	0.0145896	0.84955	0.499711	-1.00083	217406	393416	261983	321170	780462	428460	318719	606404	910410	666363
1768	P08913	COL16A1	Collagen alpha-1(XVI) chain	7	7	7	7	157751	5.61	199.067	N/A	Carbamidomethylation; Deamidation (NQ)	Homo sapiens	N/A	0.0323581	0.84955	0.49547	-1.01313	439670	836024	1761150	827690	1123340	1243720	2285990	1990760	2123970	1963060
2859	Q16186	HM13	Minor histocompatibility antigen H13	10	9	10	9	41488	29.44	190.659	N/A	Carbamidomethylation; Deamidation (NQ); Oxidation (M)	Homo sapiens	N/A	0.0317903	0.84955	0.488503	-1.03356	727251	2692350	1970920	1298940	2522710	2388990	2165710	4466590	3196540	4431710
1072	P30566	MXRA8	Matrix remodeling-associated protein 8	5	4	5	4	49132	10.63	106.37	N/A	N/A	Homo sapiens	N/A	0.0455834	0.84955	0.48467	-1.04493	193603	185028	74118.6	225165	230483	284102	391551	250603	234939	747051
1122	P30520	RAB5C	Ras-related protein Rab-5C	10	10	7	7	23483	56.94	234.526	N/A	Carbamidomethylation; Deamidation (NQ); Oxidation (M)	Homo sapiens	N/A	0.0472713	0.84955	0.480544	-1.05726	7244690	32100000	6430340	10300000	23100000	16300000	19200000	28200000	29400000	25900000
156	Q8IUX7	KIF2A	Kinesin-like protein KIF2A	1	1	1	1	79955	1.84	63.6612	N/A	N/A	Homo sapiens	N/A	0.0353441	0.84955	0.47415	-1.07659	87405.8	174137	52724.5	232699	163421	212182	239173	277870	324344	300462
1812	Q9Y4W6	MBOAT7	Lysophospholipid acyltransferase 7	3	3	3	3	52765	8.69	120.921	N/A	Carbamidomethylation	Homo sapiens	N/A	0.0464853	0.84955	0.471462	-1.08479	107452	330521	159931	76184.3	157508	317466	258678	436984	313554	462492
963	P02771	SPR	Sepiapterin reductase	2	2	2	2	28048	13.03	131.856	Metabolism > Metals and cofactors > Tetrahydrobiopterin synthesis	N/A	Homo sapiens	Tpossible_mito	0.0305984	0.84955	0.470066	-1.08907	44347.6	105516	56124.9	49410	113596	103065	59331.4	156534	234734	169763
2321	P52594	TNC	Tenascin	96	93	96	93	240853	59.84	485.657	N/A	Carbamidomethylation; Deamidation (NQ); Oxidation (M)	Homo sapiens	N/A	0.0214159	0.84955	0.463909	-1.10809	57600000	72100000	73400000	41200000	83100000	121000000	253000000	163000000	160000000	67300000
1840	Q53H12	TIMP2	Metalloproteinase inhibitor 2	11	9	11	9	24399	46.82	201.783	N/A	Carbamidomethylation	Homo sapiens	N/A	0.00722705	0.84955	0.461729	-1.11488	1633460	2247820	2454780	2241100	6303540	2142020	4750540	4541440	5035720	6386840
2237	O00116	MMP2	72 kDa type IV collagenase	37	37	37	37	73882	69.39	357.654	N/A	Carbamidomethylation; Deamidation (NQ); Oxidation (M)	Homo sapiens	N/A	0.0244351	0.84955	0.459006	-1.12341	8308980	26300000	23100000	22700000	45900000	21900000	50900000	46700000	30400000	57100000
45	O00468	MFSD10	Major facilitator superfamily domain-containing protein 10	1	1	1	1	48339	2.86	83.0886	N/A	N/A	Homo sapiens	N/A	0.0494751	0.84955	0.458955	-1.12357	19721.9	94881.6	84844.5	85009	118019	199570	82917.6	111051	160305	152596
2519	Q6RW13	TNS3	Tensin-3	5	5	4	4	155266	4.98	112.504	N/A	Carbamidomethylation	Homo sapiens	N/A	0.00658421	0.84955	0.45743	-1.12838	125387	67128.4	151444	143312	209192	433864	187423	210621	282189	266581
403	P23526	CAV2	Caveolin-2	2	2	2	2	18291	22.84	117.463	N/A	Deamidation (NQ)	Homo sapiens	N/A	0.0411789	0.84955	0.443862	-1.17182	194714	738188	249075	521060	694753	845183	415853	1008720	1603570	843548
1143	O43865	NDUFB10	NADH dehydrogenase [ubiquinone] 1 beta subcomplex subunit 10	1	1	1	1	20777	8.14	62.1388	OXPHOS > Complex I > CI subunits | OXPHOS > OXPHOS subunits	N/A	Homo sapiens	Tmito	0.00577319	0.84955	0.44033	-1.18334	181230	285210	117050	290341	346062	434841	442490	673402	615995	365687
6	Q09666	DYNC1LI1	Cytoplasmic dynein 1 light intermediate chain 1	13	13	12	12	56579	31.36	183.667	N/A	Carbamidomethylation; Deamidation (NQ)	Homo sapiens	N/A	0.0204113	0.84955	0.43836	-1.18981	1313780	5264890	5515200	5401040	7105540	9458570	8647260	8931480	10000000	8029980
253	Q8IVF2	PITRM1	Presequence protease, mitochondrial	12	11	12	11	117413	14.46	200.625	Protein import, sorting and homeostasis > Protein homeostasis > Proteases	Carbamidomethylation	Homo sapiens	Tmito	0.0218704	0.84955	0.433984	-1.20429	296202	561197	224455	759141	701891	951297	593815	1709410	1191720	883350
1900	O95433	EXOC8	Exocyst complex component 8	5	5	5	5	81799	10.9	140.738	N/A	Carbamidomethylation	Homo sapiens	N/A	0.0364276	0.84955	0.417435	-1.26038	222737	1065430	207603	188808	581916	933920	529081	755926	870859	895793
1180	P02765	KCTD12	BTB/POZ domain-containing protein KCTD12	14	12	14	12	35701	46.77	208.502	N/A	Carbamidomethylation; Deamidation (NQ)	Homo sapiens	N/A	0.0478897	0.84955	0.411102	-1.28243	1637400	2272360	8186520	10400000	12500000	9924960	10700000	13700000	8472360	7580580
872	Q96BJ3	DHCR24	Delta(24)-sterol reductase	2	2	2	2	60101	4.26	73.3952	N/A	Carbamidomethylation	Homo sapiens	N/A	0.00565111	0.84955	0.408635	-1.29112	69153	58492.9	81505.4	68456.4	150935	167365	99965.4	129511	183279	384180
2299	O95831	AMDHD2	N-acetylglucosamine-6-phosphate deacetylase	2	2	2	2	43748	7.58	89.5652	N/A	N/A	Homo sapiens	N/A	0.0256643	0.84955	0.407005	-1.29688	18080.8	38939.9	15488.8	30263	51851.4	35555.9	40489.5	64933.7	51747.6	166280
2645	Q96NN9	NDUFB8	NADH dehydrogenase [ubiquinone] 1 beta subcomplex subunit 8, mitochondrial	2	2	2	2	21766	12.37	74.1608	OXPHOS > Complex I > CI subunits | OXPHOS > OXPHOS subunits	N/A	Homo sapiens	Tmito	0.00170029	0.84955	0.402613	-1.31253	104593	159318	82514.5	135098	245701	181973	273258	453300	357420	300293
2393	Q12904	UBE2O	(E3-independent) E2 ubiquitin-conjugating enzyme	4	4	4	4	141293	3.56	127.188	N/A	N/A	Homo sapiens	N/A	0.0203093	0.84955	0.398521	-1.32727	423302	303397	242395	443090	643544	582870	1819940	1304840	1173100	387002
1126	Q13155	CDH11	Cadherin-11	11	10	11	10	87965	18.84	161.271	N/A	Carbamidomethylation	Homo sapiens	N/A	0.033257	0.84955	0.39525	-1.33916	1642780	3639440	1499210	430570	2447840	3641110	3708620	3905700	4151310	3710540
636	P00568	GORASP2	Golgi reassembly-stacking protein 2	3	3	3	3	47145	13.27	132.364	N/A	Carbamidomethylation; Deamidation (NQ)	Homo sapiens	N/A	0.00683748	0.84955	0.373912	-1.41923	38573.5	140147	78157.5	110023	200010	170050	185255	255658	185641	387837
2325	P54819	COL6A1	Collagen alpha-1(VI) chain	45	44	45	44	108529	50.29	411.344	N/A	Carbamidomethylation; Deamidation (NQ); Oxidation (M)	Homo sapiens	N/A	0.0410187	0.84955	0.370575	-1.43216	33500000	65600000	68500000	54400000	73900000	70600000	204000000	97300000	170000000	514000000
1120	Q9UIJ7	TOR1A	Torsin-1A	2	2	2	2	37809	7.23	73.5908	N/A	N/A	Homo sapiens	N/A	0.0094552	0.84955	0.360417	-1.47226	25160.7	103807	43115.7	65135.8	91272.9	109595	121310	162751	205325	223500
3026	P27144	WNT5B	Protein Wnt-5b	2	2	2	2	40323	8.36	76.8179	N/A	Carbamidomethylation	Homo sapiens	N/A	0.0380426	0.84955	0.340567	-1.55399	68186.2	175920	15422.9	35056.6	101090	213635	163045	106502	164594	171492
1230	Q9Y6K8	NDUFA9	NADH dehydrogenase [ubiquinone] 1 alpha subcomplex subunit 9, mitochondrial	3	3	3	3	42510	13	84.1832	OXPHOS > Complex I > CI subunits | OXPHOS > OXPHOS subunits	N/A	Homo sapiens	Tmito	0.021935	0.84955	0.334641	-1.57932	58199.5	144569	121172	37171	347039	305514	82615.3	344913	318986	172378
760	Q02952	SSR3	Translocon-associated protein subunit gamma	1	1	1	1	21080	7.57	42.7691	N/A	N/A	Homo sapiens	N/A	0.0193211	0.84955	0.333343	-1.58492	132920	268998	41398.8	80634.6	262902	180201	236513	417616	368801	550740
1428	Q9Y2D5	KIAA2013	Uncharacterized protein KIAA2013	1	1	1	1	69157	2.05	53.5833	N/A	Carbamidomethylation	Homo sapiens	N/A	0.0177363	0.84955	0.317981	-1.65299	8395.06	48512.6	19185.6	51301.1	95906.3	70970.5	65765.2	45460.7	98062.9	123027
555	P14550	COL6A3	Collagen alpha-3(VI) chain	187	185	187	185	343669	63.64	538.321	N/A	Carbamidomethylation; Deamidation (NQ); Oxidation (M)	Homo sapiens	N/A	0.0212553	0.84955	0.258206	-1.95341	38700000	135000000	245000000	145000000	262000000	208000000	685000000	343000000	466000000	1430000000
666	P15121	PSMD12	26S proteasome non-ATPase regulatory subunit 12	11	10	11	10	52904	24.12	178.178	N/A	Carbamidomethylation	Homo sapiens	N/A	0.0278956	0.84955	0.233474	-2.09867	634763	1303510	1070430	1290360	7941520	1402430	9758190	7655080	9060830	1000680
303	Q04828	PLSCR4	Phospholipid scramblase 4	3	3	3	3	37005	12.46	99.3476	N/A	N/A	Homo sapiens	N/A	0.00170776	0.84955	0.220329	-2.18227	60524.9	324179	218351	137107	417189	638652	1051010	823590	819706	658250
484	P52895	COL6A2	Collagen alpha-2(VI) chain	35	34	35	34	108579	35.72	371.352	N/A	Carbamidomethylation; Deamidation (NQ); Oxidation (M)	Homo sapiens	N/A	0.0237347	0.84955	0.21731	-2.20218	5919020	23600000	35800000	19400000	41400000	29400000	130000000	57000000	90900000	350000000
469	P42330	LPCAT1	Lysophosphatidylcholine acyltransferase 1	2	2	2	2	59151	5.06	95.5365	N/A	Carbamidomethylation	Homo sapiens	N/A	0.00942624	0.84955	0.21613	-2.21003	7840.44	84055.3	15096.1	29300	74403.1	178583	110570	90482.8	68468.6	169643
976	O43488	THBS1	Thrombospondin-1	92	91	87	87	129383	74.44	532.539	N/A	Carbamidomethylation; Deamidation (NQ); Oxidation (M)	Homo sapiens	N/A	0.0196843	0.84955	0.209852	-2.25256	71200000	131000000	229000000	133000000	562000000	661000000	1850000000	1840000000	272000000	163000000
1423	Q8NHP1	TMEM97	Sigma intracellular receptor 2	2	2	2	2	20848	10.23	73.059	N/A	N/A	Homo sapiens	N/A	0.0442122	0.84955	0.181892	-2.45885	13929.3	103424	75036.4	3329.35	87115.1	162302	160519	112317	58358.7	400775
1568	P13716	THBS2	Thrombospondin-2	25	24	21	20	129991	25.26	295.594	N/A	Carbamidomethylation; Deamidation (NQ)	Homo sapiens	N/A	0.00474219	0.84955	0.135355	-2.88518	120390	243338	915631	128121	862025	947460	3969810	4336790	1809590	1287540
216	P02768	TUBB8B	Tubulin beta 8B	12	12	2	2	49573	9.01	255.996	N/A	Carbamidomethylation; Deamidation (NQ); Oxidation (M)	Homo sapiens	N/A	0.0214484	0.84955	0.134347	-2.89596	11953.6	456621	298565	37110.2	611005	747479	358082	878148	613085	908437
222	Q13740	AP3B1	AP-3 complex subunit beta-1	13	12	13	12	121320	12.07	173.992	N/A	Carbamidomethylation	Homo sapiens	N/A	0.0438646	0.84955	0.13282	-2.91245	23500000	101000000	1574100	1406220	45800000	57600000	45700000	75400000	90300000	84500000
1582	Q8IZ83	PRAF2	PRA1 family protein 2	2	2	2	2	19258	16.29	68.3604	N/A	N/A	Homo sapiens	N/A	0.0384914	0.84955	0.129181	-2.95253	180577	115874	3410420	3337990	2608800	2107420	3852430	13800000	7132210	12000000
1631	P54886	CCNY	Cyclin-Y	4	4	2	2	39337	9.38	112.265	N/A	Deamidation (NQ)	Homo sapiens	N/A	0.0383269	0.84955	0.0928608	-3.42879	5106.02	785223	652259	70174.3	741068	1405760	2406720	1395820	1500160	738510
1021	P30837	PCDH18	Protocadherin-18	1	1	1	1	126149	1.32	65.1344	N/A	N/A	Homo sapiens	N/A	0.0448429	0.84955	0.00497709	-7.65048	0	28191.4	0	10134	18859.5	39550.5	28634.2	25023.6	20366.3	29185.1
281	Q3SY69	SLC25A4	ADP/ATP translocase 1	12	12	1	1	33064	3.02	240.075	Metabolism > Nucleotide metabolism > Nucleotide import | Signaling > Calcium homeostasis > Mitochondrial permeability transition pore | Small molecule transport > SLC25A family	N/A	Homo sapiens	Tmito	0.0489283	0.84955	0.00361215	-8.11293	0	31092.9	0	50461.2	37142.2	44184.6	49009.9	103207	56690.1	59456.5
1063	P05091	NPR2	Atrial natriuretic peptide receptor 2	1	1	1	1	117022	1.34	42.4128	N/A	N/A	Homo sapiens	N/A	0.0389146	0.84955	0.0032428	-8.26855	0	0	23952	24661.6	22107.1	80793.2	34532.4	36910.3	51207.6	105903
1890	P51648	UBE3C	Ubiquitin-protein ligase E3C	1	1	1	1	123923	1.57	52.1868	N/A	N/A	Homo sapiens	N/A	0.0361713	0.84955	0.00295096	-8.4046	0	0	0	0	0	13479	8283.1	0	2963.69	4576.57
1443	P43353	RANBP9	Ran-binding protein 9	1	1	1	1	77847	1.92	57.2611	N/A	N/A	Homo sapiens	N/A	0.0368364	0.84955	0.00182577	-9.09728	0	0	0	0	6125.19	0	18855.7	5728.92	40802.5	0
2410	P30038	MITD1	MIT domain-containing protein 1	1	1	1	1	29314	6.02	51.5909	N/A	N/A	Homo sapiens	N/A	0.0355166	0.84955	0.000900536	-10.1169	0	0	0	0	0	0	33130.2	21666.3	57311.8	45576.6
464	P49419	MMP9	Matrix metalloproteinase-9	2	2	2	2	78458	3.54	82.7088	N/A	Carbamidomethylation	Homo sapiens	N/A	0.0368546	0.84955	0.000827366	-10.2392	0	0	0	0	79828.6	9746.04	37366.7	107236	0	0
2710	Q9H2A2	ARHGAP35	Rho GTPase-activating protein 35	2	2	1	1	170514	0.6	57.4636	N/A	N/A	Homo sapiens	N/A	0.00560546	0.84955	0.000384064	-11.3464	0	0	0	35292.4	12395.1	88479.8	37834.8	47814	27315.2	38119.9
753	P49189	AQP1	Aquaporin-1	1	1	1	1	28526	7.43	83.2619	N/A	N/A	Homo sapiens	N/A	0.0359604	0.84955	0.00035308	-11.4677	0	0	0	0	0	66689.4	0	104963	425533	173273
115	P04075	RAB3GAP2	Rab3 GTPase-activating protein non-catalytic subunit	2	2	2	2	155985	1.58	89.7277	N/A	N/A	Homo sapiens	N/A	0.00932218	0.84955	0.000319991	-11.6097	0	131727	0	0	13003.6	93496.8	95659.9	87925.9	46729.7	93193.9
1683	P05062	NECAP2	Adaptin ear-binding coat-associated protein 2	1	1	1	1	28339	5.32	49.1114	N/A	N/A	Homo sapiens	N/A	0.00444567	0.84955	0.000192868	-12.3401	0	60786.7	0	0	58435.3	97409.5	47424.7	98581.3	93942.2	116471
825	P09972	GLUD2	Glutamate dehydrogenase 2, mitochondrial	17	17	1	1	61434	2.33	237.74	Metabolism > Amino acid metabolism > Glutamate metabolism | Metabolism > Amino acid metabolism > GABA metabolism	N/A	Homo sapiens	Tpossible_mito	5.11771e-10	1.39406e-06	9.8842e-05	-13.3045	0	0	0	0	6833.33	4633.11	14015	11421.4	19987	10587.3
