# Supplementary material for: Large extracellular vesicles containing mitochondria (EVMs) derived from Alzheimer’s disease cells harbor pathologic functional and molecular profiles and spread mitochondrial dysfunctions
Source: Research Square preprint supplement (doi:10.21203/rs.3.rs-5932075/v1), 2025-02-13
Supplement: Supplementary file 3 [file 8503638d0dadc4a1e89aaadf.xlsx]

## Sheet: Heatmap AD-DvsCTRL prot MITO
Up-regulated																			EVMs CTRL				EVMs AD-D
Protein Group	Accession	Gene	Description	#Peptides DB	#Peptides LFQ	#Unique DB	#Unique LFQ	Avg. Mass	Coverage (%)	-10LgP	MitoPathway	PTM	Taxonomia	Training Data set	p-value	q-value	Fold change	Log2(FC)	EVMs CTRL-1 Area	EVMs CTRL-2 Area	EVMs CTRL-3 Area	EVMs CTRL-4 Area	EVMs AD-D-3 Area	EVMs AD-D-4 Area	EVMs AD-D-1 Area	EVMs AD-D-2 Area
2986	P80404	ABAT	4-aminobutyrate aminotransferase, mitochondrial	1	1	1	1	56439	3	62.891	Metabolism > Amino acid metabolism > GABA metabolism | Metabolism > Metals and cofactors > Fe-S-containing proteins	N/A	Homo sapiens	Tmito	1	1	1		0	0	0	0	0	0	0	0
2699	P28288	ABCD3	ATP-binding cassette sub-family D member 3	1	1	1	1	75476	2.12	42.9789	Small molecule transport > ABC transporters	N/A	Homo sapiens	Tmito	0.133988	0.908476	0.00697498		21937.8	0	19259.1	0	0	0	0	0
1341	P09110	ACAA1	3-ketoacyl-CoA thiolase, peroxisomal	6	6	6	6	44292	25.71	180.576	Metabolism > Lipid metabolism	Carbamidomethylation	Homo sapiens	Tpossible_mito	0.683168	0.941266	1.24628		258110	109291	879008	124503	308160	413927	171975	339516
606	P42765	ACAA2	3-ketoacyl-CoA thiolase, mitochondrial	14	13	14	13	41924	48.36	219.961	Metabolism > Carbohydrate metabolism > Ketone metabolism | Metabolism > Lipid metabolism > Fatty acid oxidation | Metabolism > Amino acid metabolism > Lysine metabolism	Carbamidomethylation; Deamidation (NQ); Oxidation (M)	Homo sapiens	Tmito	0.478788	0.916254	0.457074		2608320	40300000	2098660	53700000	6066980	2026080	1938380	21700000
1779	Q9H845	ACAD9	Complex I assembly factor ACAD9, mitochondrial	4	4	4	4	68760	13.2	139.262	OXPHOS > Complex I > CI assembly factors | OXPHOS > OXPHOS assembly factors	Carbamidomethylation	Homo sapiens	Tmito	0.184572	0.908476	2.81287		144820	22161.1	55847.4	17574.7	59015.9	87223.5	74836.7	511908
2239	P11310	ACADM	Medium-chain specific acyl-CoA dehydrogenase, mitochondrial	2	2	2	2	46588	5.23	73.1585	Metabolism > Lipid metabolism > Fatty acid oxidation	N/A	Homo sapiens	Tmito	0.256256	0.908476	39.9447		280991	88492	0	64153.8	153993	312085	288150	293266
367	P49748	ACADVL	Very long-chain specific acyl-CoA dehydrogenase, mitochondrial	22	20	22	20	70390	43.97	239.856	Metabolism > Lipid metabolism > Fatty acid oxidation	Carbamidomethylation; Deamidation (NQ)	Homo sapiens	Tmito	0.460351	0.916254	1.22642		11400000	12100000	9316190	5942560	7187220	9865370	13100000	18600000
727	P24752	ACAT1	Acetyl-CoA acetyltransferase, mitochondrial	13	12	13	12	45200	40.28	246.417	Metabolism > Carbohydrate metabolism > Ketone metabolism | Metabolism > Lipid metabolism > Fatty acid oxidation | Metabolism > Amino acid metabolism > Branched-chain amino acid metabolism | Metabolism > Amino acid metabolism > Lysine metabolism	Carbamidomethylation; Oxidation (M)	Homo sapiens	Tmito	0.509726	0.916254	1.35544		3443710	787070	3298950	767543	2010280	2829830	1823660	2232920
134	P53396	ACLY	ATP-citrate synthase	44	42	44	42	120839	45.32	342.794	Metabolism > Carbohydrate metabolism > TCA-associated	Carbamidomethylation; Oxidation (M)	Homo sapiens	Tmito	0.4879	0.916254	0.803851		54700000	22900000	31000000	23900000	16100000	23100000	22900000	45500000
333	Q99798	ACO2	Aconitate hydratase, mitochondrial	24	24	24	24	85425	38.33	263.462	Metabolism > Carbohydrate metabolism > TCA cycle | Metabolism > Metals and cofactors > Fe-S-containing proteins	Carbamidomethylation; Deamidation (NQ)	Homo sapiens	Tmito	0.525694	0.916254	1.86537		21000000	14000000	19500000	1828840	2180490	31100000	45000000	41600000
2673	Q9NPJ3	ACOT13	Acyl-coenzyme A thioesterase 13	1	1	1	1	14960	7.14	43.9123	Metabolism > Lipid metabolism	N/A	Homo sapiens	Tpossible_mito	0.37825	0.908476	0.480068		116600	34461.7	163517	55184.7	6406.59	168257	59855.6	29848.3
1829	O00154	ACOT7	Cytosolic acyl coenzyme A thioester hydrolase	4	3	4	3	41796	10.26	123.211	Metabolism > Lipid metabolism	Oxidation (M)	Homo sapiens	Tpossible_mito	0.673891	0.941266	0.873512		988650	256472	324151	464217	338908	420207	334792	465914
1760	Q9Y305	ACOT9	Acyl-coenzyme A thioesterase 9, mitochondrial	4	4	4	4	49902	11.85	104.04	Metabolism > Lipid metabolism	N/A	Homo sapiens	Tmito	0.628712	0.941266	1.28116		987361	152520	349745	130500	248959	365916	495902	409895
1812	Q9Y4W6	AFG3L2	AFG3-like protein 2	4	4	3	3	88584	3.39	143.647	Protein import, sorting and homeostasis > Protein homeostasis > Proteases	Carbamidomethylation	Homo sapiens	Tmito	0.343164	0.908476	1.97351		453409	188193	86152	58602.2	122734	124520	681918	627034
1840	Q53H12	AGK	Acylglycerol kinase, mitochondrial	4	4	4	4	47137	12.8	105.51	Protein import, sorting and homeostasis > Protein import and sorting > TIM22 carrier pathway | Metabolism > Lipid metabolism > Phospholipid metabolism	N/A	Homo sapiens	Tmito	0.970597	1	0.977874		399113	618074	341437	133547	120098	387491	196197	1126490
2299	O95831	AIFM1	Apoptosis-inducing factor 1, mitochondrial	2	2	2	2	66901	3.92	64.2829	Protein import, sorting and homeostasis > Protein import and sorting > MIA40 | OXPHOS > Complex I > CI assembly factors | OXPHOS > OXPHOS assembly factors | Mitochondrial dynamics and surveillance > Apoptosis	N/A	Homo sapiens	Tmito	0.181544	0.908476	1.58761		55923	16280.7	37293.8	20725.2	31999.8	53991.7	48447.1	53411.2
2645	Q96NN9	AIFM3	Apoptosis-inducing factor 3	1	1	1	1	66791	1.16	45.8876	Metabolism > Metals and cofactors > Fe-S-containing proteins | Mitochondrial dynamics and surveillance > Apoptosis	Deamidation (NQ)	Homo sapiens	Tmito	0.575449	0.916254	1.43419		1303030	340456	136899	203877	380535	190677	831958	867797
2325	P54819	AK2	Adenylate kinase 2, mitochondrial	2	2	2	2	26478	14.64	92.2012	Metabolism > Nucleotide metabolism > Nucleotide synthesis and processing	N/A	Homo sapiens	Tmito	0.135912	0.908476	1.66049		153633	68641.8	197504	94847.5	321542	192703	143315	169121
1120	Q9UIJ7	AK3	GTP:AMP phosphotransferase AK3, mitochondrial	7	7	7	7	25565	37.89	153.833	Metabolism > Nucleotide metabolism > Nucleotide synthesis and processing	Deamidation (NQ)	Homo sapiens	Tmito	0.0373782	0.908476	17.6793	4.14399	976194	451915	1378070	1951860	30300000	52300000	82500000	886705
3026	P27144	AK4	Adenylate kinase 4, mitochondrial	1	1	1	1	25268	5.38	47.0813	Metabolism > Nucleotide metabolism > Nucleotide synthesis and processing	N/A	Homo sapiens	Tmito	0.968024	1	1.17956		0	0	51152.9	0	0	0	0	99026.2
976	O43488	AKR7A2	Aflatoxin B1 aldehyde reductase member 2	8	8	4	4	39589	19.78	193.395	Metabolism > Amino acid metabolism > GABA metabolism | Metabolism > Detoxification > Xenobiotic metabolism	Carbamidomethylation; Deamidation (NQ)	Homo sapiens	Tmito	0.581123	0.916254	1.43686		1959200	418847	1007650	145402	386828	1003420	1196300	1103650
1631	P54886	ALDH18A1	Delta-1-pyrroline-5-carboxylate synthase	5	5	5	5	87302	7.42	128.837	Metabolism > Amino acid metabolism > Proline metabolism	N/A	Homo sapiens	Tmito	0.501578	0.916254	1.53289		3317540	1095830	554823	920050	1561470	511221	3182120	4033730
1021	P30837	ALDH1B1	Aldehyde dehydrogenase X, mitochondrial	9	9	9	9	57249	27.47	182.45	Metabolism > Detoxification > Xenobiotic metabolism	Oxidation (M)	Homo sapiens	Tmito	0.983921	1	1.01842		1093090	137261	1732310	202139	82339.9	1256450	679868	803544
281	Q3SY69	ALDH1L2	Mitochondrial 10-formyltetrahydrofolate dehydrogenase	26	23	26	23	101746	31.53	256.189	Metabolism > Vitamin metabolism > Folate and 1-C metabolism	Carbamidomethylation; Deamidation (NQ)	Homo sapiens	Tmito	0.68301	0.941266	1.20705		5593330	1157320	1744000	876325	1536210	2092300	1964880	3325330
1063	P05091	ALDH2	Aldehyde dehydrogenase, mitochondrial	8	7	8	7	56381	17.79	180.989	Metabolism > Detoxification > Xenobiotic metabolism	N/A	Homo sapiens	Tmito	0.35694	0.908476	1.4334		933937	419055	435684	209650	358440	652727	753766	855727
1890	P51648	ALDH3A2	Aldehyde dehydrogenase family 3 member A2	3	3	2	2	54848	5.15	99.1393	Metabolism > Detoxification > ROS and glutathione metabolism	N/A	Homo sapiens	Tpossible_mito	0.990312	1	1.05335		80154.6	0	150346	82894.4	0	106071	38499	301158
2410	P30038	ALDH4A1	Delta-1-pyrroline-5-carboxylate dehydrogenase, mitochondrial	2	1	2	1	61719	1.42	58.1357	Metabolism > Amino acid metabolism > Proline metabolism | Metabolism > Amino acid metabolism > Glyoxylate metabolism	N/A	Homo sapiens	Tmito	0.116727	0.908476	0.00343536		71439.1	80709	65579.6	38373.6	38829.4	0	0	52046.1
464	P49419	ALDH7A1	Alpha-aminoadipic semialdehyde dehydrogenase	19	19	19	19	58487	47.87	270.003	Metabolism > Amino acid metabolism > Lysine metabolism | Metabolism > Amino acid metabolism > Glycine metabolism | Metabolism > Vitamin metabolism > Choline and betaine metabolism | Metabolism > Vitamin metabolism > Folate and 1-C metabolism | Metabolism > Detoxification > ROS and glutathione metabolism	Carbamidomethylation; Deamidation (NQ)	Homo sapiens	Tmito	0.140133	0.908476	1.60579		5884730	1944960	5321760	4004040	7207850	7105500	4386120	7218850
753	P49189	ALDH9A1	4-trimethylaminobutyraldehyde dehydrogenase	14	13	14	13	53802	31.17	200.949	Metabolism > Amino acid metabolism > GABA metabolism | Metabolism > Detoxification > ROS and glutathione metabolism	Acetylation (Protein N-term); Carbamidomethylation; Oxidation (M)	Homo sapiens	Tmito	0.375929	0.908476	0.813214		7839430	3621450	5885530	4516370	2833910	4894150	4647470	5120130
2834	P27695	APEX1	DNA-(apurinic or apyrimidinic site) endonuclease	1	1	1	1	35554	5.35	59.2502	Mitochondrial central dogma > mtDNA maintenance > mtDNA repair	N/A	Homo sapiens	Tpossible_mito	0.242573	0.908476	29.9537		17022.5	0	18324	58060	341966	29876.3	41572.2	34324.8
2423	P36404	ARL2	ADP-ribosylation factor-like protein 2	2	2	2	2	20878	10.87	58.7401	Mitochondrial dynamics and surveillance > Fusion	N/A	Homo sapiens	Tmito	0.910822	1	0.95434		60420.8	43612.4	81670.9	59580.3	55068.4	71596.7	128939	20921.8
1506	Q9UH62	ARMCX3	Armadillo repeat-containing X-linked protein 3	5	4	5	4	42501	15.04	147.938	Mitochondrial dynamics and surveillance > Trafficking	N/A	Homo sapiens	Tpossible_mito	0.870117	1	0.901733		1010160	77080.7	288827	167720	144958	497347	183410	188602
1339	Q9NVI7	ATAD3A	ATPase family AAA domain-containing protein 3A	7	7	4	4	71369	8.99	172.747	Mitochondrial central dogma > mtDNA maintenance > mtDNA nucleoid | Mitochondrial dynamics and surveillance > Organelle contact sites | Mitochondrial dynamics and surveillance > Intramitochondrial membrane interactions	N/A	Homo sapiens	Tmito	0.513697	0.916254	1.49415		1518590	177629	656690	153558	502506	878191	394903	777924
1825	Q5T9A4	ATAD3B	ATPase family AAA domain-containing protein 3B	4	4	1	1	72573	1.85	113.031	Mitochondrial central dogma > mtDNA maintenance > mtDNA nucleoid | Mitochondrial dynamics and surveillance > Organelle contact sites | Mitochondrial dynamics and surveillance > Intramitochondrial membrane interactions	N/A	Homo sapiens	Tmito	0.372081	0.908476	1.64316		196840	208980	73952.7	179275	349472	402658	64866.5	435553
266	P25705	ATP5F1A	ATP synthase subunit alpha, mitochondrial	24	23	24	23	59751	50.27	320.298	OXPHOS > Complex V > CV subunits | OXPHOS > OXPHOS subunits	Oxidation (M)	Homo sapiens	Tmito	0.360289	0.908476	1.43289		50900000	16500000	23800000	10400000	23500000	24900000	36000000	41600000
148	P06576	ATP5F1B	ATP synthase subunit beta, mitochondrial	24	24	24	24	56560	68.81	332.965	OXPHOS > Complex V > CV subunits | OXPHOS > OXPHOS subunits	Deamidation (NQ); Oxidation (M)	Homo sapiens	Tmito	0.415695	0.908476	1.25269		54900000	28000000	42100000	22200000	32200000	34200000	61900000	51900000
1065	P36542	ATP5F1C	ATP synthase subunit gamma, mitochondrial	8	7	8	7	32996	32.21	163.639	OXPHOS > Complex V > CV subunits | OXPHOS > OXPHOS subunits	Carbamidomethylation; Deamidation (NQ)	Homo sapiens	Tmito	0.660713	0.941266	1.20328		2550900	663221	1649860	512361	987497	1277400	1255040	1893720
2466	P30049	ATP5F1D	ATP synthase subunit delta, mitochondrial	1	1	1	1	17490	8.33	63.7232	OXPHOS > Complex V > CV subunits | OXPHOS > OXPHOS subunits	N/A	Homo sapiens	Tmito	0.37881	0.908476	18.647		326213	89580.6	317470	0	173810	225818	188660	151474
2399	P56385	ATP5ME	ATP synthase subunit e, mitochondrial	2	2	2	2	7933	30.43	59.3274	OXPHOS > Complex V > CV subunits | OXPHOS > OXPHOS subunits | Mitochondrial dynamics and surveillance > Cristae formation	N/A	Homo sapiens	Tmito	0.506643	0.916254	26.5091		141606	0	125815	0	37857.5	1529550	0	151942
1732	P56134	ATP5MF	ATP synthase subunit f, mitochondrial	3	3	3	3	10918	39.36	102.365	OXPHOS > Complex V > CV subunits | OXPHOS > OXPHOS subunits	Acetylation (Protein N-term); Carbamidomethylation; Oxidation (M)	Homo sapiens	Tmito	0.435645	0.916254	1.51772		761410	222985	689442	120768	456221	462619	356484	996939
1704	O75964	ATP5MG	ATP synthase subunit g, mitochondrial	4	4	4	4	11428	46.6	125.648	OXPHOS > Complex V > CV subunits | OXPHOS > OXPHOS subunits | Mitochondrial dynamics and surveillance > Cristae formation	N/A	Homo sapiens	Tmito	0.862515	1	1.12074		486851	299084	1622190	218668	972658	670482	140750	887776
3089	Q96IX5	ATP5MK	ATP synthase membrane subunit K, mitochondrial	1	1	1	1	6458	25.86	52.3092	OXPHOS > Complex V > CV subunits | OXPHOS > OXPHOS subunits | Mitochondrial dynamics and surveillance > Cristae formation	N/A	Homo sapiens	Tmito	0.355918	0.908476	0.0733975		0	0	34456.7	0	0	0	0	0
1257	P24539	ATP5PB	ATP synthase F(0) complex subunit B1, mitochondrial	7	7	7	7	28909	29.3	170.353	OXPHOS > Complex V > CV subunits | OXPHOS > OXPHOS subunits	N/A	Homo sapiens	Tmito	0.885363	1	1.0586		2415920	780043	1788120	511946	1035460	1282370	985163	1656110
1273	O75947	ATP5PD	ATP synthase subunit d, mitochondrial	6	6	6	6	18491	42.24	155.264	OXPHOS > Complex V > CV subunits | OXPHOS > OXPHOS subunits	Carbamidomethylation	Homo sapiens	Tmito	0.315434	0.908476	2.84069		1013210	467354	1295520	22274	893352	778299	772328	1656950
783	P48047	ATP5PO	ATP synthase subunit O, mitochondrial	10	10	10	10	23277	57.75	209.611	OXPHOS > Complex V > CV subunits | OXPHOS > OXPHOS subunits	Carbamidomethylation; Deamidation (NQ)	Homo sapiens	Tmito	0.221398	0.908476	1.30206		6533930	3410120	6623610	3667520	5130370	7080260	6320490	6776250
1038	Q07021	C1QBP	Complement component 1 Q subcomponent-binding protein, mitochondrial	6	6	6	6	31362	28.37	193.889	Signaling > Immune response	Carbamidomethylation; Deamidation (NQ)	Homo sapiens	Tmito	0.287269	0.908476	3.12445		1678860	26962	769088	373055	364411	2260970	1355170	1108490
2911	Q9HA77	CARS2	Probable cysteine--tRNA ligase, mitochondrial	1	1	1	1	62224	3.19	54.146	Mitochondrial central dogma > Translation > mt-tRNA synthetases	N/A	Homo sapiens	Tmito	0.205559	0.908476	126.219		110287	0	132119	0	46219.4	14138	43592.6	129826
481	P04040	CAT	Catalase	17	16	17	16	59756	38.9	285.273	Metabolism > Detoxification > ROS and glutathione metabolism	Carbamidomethylation; Deamidation (NQ); Oxidation (M)	Homo sapiens	Tpossible_mito	0.0860383	0.908476	1.4713		5915820	4109540	4858900	4016650	8351030	5519560	4903810	9836510
1199	Q9NX63	CHCHD3	MICOS complex subunit MIC19	8	8	8	8	26152	35.24	182.411	Mitochondrial dynamics and surveillance > Cristae formation > MICOS complex | Mitochondrial dynamics and surveillance > Intramitochondrial membrane interactions	Carbamidomethylation	Homo sapiens	Tmito	0.571652	0.916254	1.32358		1349270	242631	1263520	318219	745522	928641	569823	1024000
3073	O76031	CLPX	ATP-dependent Clp protease ATP-binding subunit clpX-like, mitochondrial	1	1	1	1	69224	2.05	46.8262	Protein import, sorting and homeostasis > Protein homeostasis > Proteases	N/A	Homo sapiens	Tmito	0.242248	0.908476	2.70462		632141	426035	126229	87932.1	436460	139702	2202400	1191110
388	P21964	COMT	Catechol O-methyltransferase	18	18	18	18	30037	71.22	268.863	Metabolism > Amino acid metabolism > Catechol metabolism	Carbamidomethylation; Deamidation (NQ); Oxidation (M)	Homo sapiens	Tmito	0.547132	0.916254	1.41044		5956200	1317380	5580750	736728	3049930	4457260	2480320	3786400
1632	P13073	COX4I1	Cytochrome c oxidase subunit 4 isoform 1, mitochondrial	5	5	5	5	19577	26.63	117.14	OXPHOS > Complex IV > CIV subunits | OXPHOS > OXPHOS subunits	N/A	Homo sapiens	Tmito	0.786436	0.984918	1.13248		2150070	859191	3087450	502623	1804250	1077330	1256160	1931190
2872	P20674	COX5A	Cytochrome c oxidase subunit 5A, mitochondrial	1	1	1	1	16762	20	47.444	OXPHOS > Complex IV > CIV subunits | OXPHOS > OXPHOS subunits	N/A	Homo sapiens	Tmito	0.252603	0.908476	132.304		0	0	89090.8	0	0	19818.5	16290.8	84549.9
2057	P10606	COX5B	Cytochrome c oxidase subunit 5B, mitochondrial	3	3	3	3	13696	19.38	88.6951	OXPHOS > Complex IV > CIV subunits | OXPHOS > OXPHOS subunits	N/A	Homo sapiens	Tmito	0.469382	0.916254	2.24327		339230	286634	628200	7060.54	369306	175980	306120	548966
2178	P09669	COX6C	Cytochrome c oxidase subunit 6C	2	1	2	1	8781	9.33	70.738	OXPHOS > Complex IV > CIV subunits | OXPHOS > OXPHOS subunits	N/A	Homo sapiens	Tmito	0.869333	1	1.09997		218876	95775.5	427218	39836.2	227817	95262.8	118303	203423
1925	P36551	CPOX	Oxygen-dependent coproporphyrinogen-III oxidase, mitochondrial	3	3	3	3	50152	6.39	88.1329	Metabolism > Metals and cofactors > Heme synthesis and processing	Carbamidomethylation	Homo sapiens	Tmito	0.385433	0.908476	0.412696		237857	3125490	4940300	3710870	4430120	312483	300100	951640
1210	P50416	CPT1A	Carnitine O-palmitoyltransferase 1, liver isoform	7	6	7	6	88368	10.09	145.664	Metabolism > Lipid metabolism > Fatty acid oxidation | Metabolism > Metals and cofactors > Carnitine synthesis and transport | Metabolism > Metals and cofactors > Carnitine shuttle	Carbamidomethylation; Deamidation (NQ)	Homo sapiens	Tmito	0.316407	0.908476	2.24725		1259180	69302.3	302518	121888	358386	414595	327435	1686760
938	Q08257	CRYZ	Quinone oxidoreductase	10	10	10	10	35207	43.77	187.506	0	Carbamidomethylation; Deamidation (NQ)	Homo sapiens	Tmito	0.420533	0.908476	1.52563		392736	254540	1434990	415946	1047510	1515900	368136	552968
600	O75390	CS	Citrate synthase, mitochondrial	16	16	16	16	51712	48.5	234.53	Metabolism > Carbohydrate metabolism > TCA cycle	Carbamidomethylation; Deamidation (NQ); Oxidation (M)	Homo sapiens	Tmito	0.303217	0.908476	1.43895		9554900	2878910	6646180	3145860	6459170	7179590	5212850	10200000
1721	O43169	CYB5B	Cytochrome b5 type B	3	3	3	3	16695	43.33	134.195	Metabolism > Metals and cofactors > Heme-containing proteins | Metabolism > Detoxification > Xenobiotic metabolism | Metabolism > Detoxification > Amidoxime reducing complex | Metabolism > Electron carriers > Cytochromes	Deamidation (NQ)	Homo sapiens	Tmito	0.654498	0.941266	1.3325		638805	416729	2487840	145360	639353	1084090	515803	848931
168	P00387	CYB5R3	NADH-cytochrome b5 reductase 3	21	20	21	20	34235	78.74	341.205	Metabolism > Detoxification > Xenobiotic metabolism | Metabolism > Detoxification > Amidoxime reducing complex | Metabolism > Lipid metabolism	Carbamidomethylation; Deamidation (NQ); Oxidation (M)	Homo sapiens	Tmito	0.845559	1	1.08296		48000000	16300000	64400000	16300000	22900000	45200000	27700000	39400000
1453	P08574	CYC1	Cytochrome c1, heme protein, mitochondrial	6	6	6	6	35422	26.15	156.174	OXPHOS > Complex III > CIII subunits | Metabolism > Metals and cofactors > Heme-containing proteins | Metabolism > Electron carriers > Cytochromes | OXPHOS > OXPHOS subunits	Carbamidomethylation	Homo sapiens	Tmito	0.24216	0.908476	1.60482		3428430	1173980	2875670	846050	2054790	3123740	2639700	3833570
2085	P99999	CYCS	Cytochrome c	3	3	3	3	11749	31.43	111.011	Metabolism > Metals and cofactors > Heme-containing proteins | Metabolism > Electron carriers > Cytochromes | OXPHOS > OXPHOS subunits | OXPHOS > Cytochrome C | Mitochondrial dynamics and surveillance > Apoptosis	N/A	Homo sapiens	Tmito	0.0920725	0.908476	1.68711		366538	207459	437412	153610	529420	425934	354970	517125
2146	Q7Z4W1	DCXR	L-xylulose reductase	2	2	2	2	25913	8.61	68.2682	Metabolism > Carbohydrate metabolism	N/A	Homo sapiens	Tmito	0.487532	0.916254	1.19458		312419	201738	194038	125822	202983	302800	165816	307458
1203	Q16698	DECR1	2,4-dienoyl-CoA reductase [(3E)-enoyl-CoA-producing], mitochondrial	7	7	7	7	36068	25.37	177.536	Metabolism > Lipid metabolism > Fatty acid oxidation	N/A	Homo sapiens	Tmito	0.345268	0.908476	1.55767		1748530	317305	1416610	572901	861912	1728490	1072880	1658450
2467	Q7L2E3	DHX30	ATP-dependent RNA helicase DHX30	1	1	1	1	133938	1.51	49.6908	Mitochondrial central dogma > mtRNA metabolism > mtRNA granules | Mitochondrial central dogma > Translation > Mitochondrial ribosome assembly	N/A	Homo sapiens	Tmito	0.198372	0.908476	121.542		9975.69	0	0	0	0	10320.1	6368.14	33125.4
1759	P10515	DLAT	Dihydrolipoyllysine-residue acetyltransferase component of pyruvate dehydrogenase complex, mitochondrial	4	4	4	4	68997	7.11	108.953	Metabolism > Carbohydrate metabolism > Pyruvate metabolism	Carbamidomethylation	Homo sapiens	Tmito	0.572341	0.916254	1.30273		387298	100638	186842	79620.7	121056	309130	134779	331117
572	P09622	DLD	Dihydrolipoyl dehydrogenase, mitochondrial	11	11	11	11	54177	31.43	227.872	Metabolism > Carbohydrate metabolism > Pyruvate metabolism | Metabolism > Carbohydrate metabolism > TCA cycle | Metabolism > Amino acid metabolism > Branched-chain amino acid metabolism | Metabolism > Amino acid metabolism > Branched-chain amino acid dehydrogenase complex | Metabolism > Amino acid metabolism > Lysine metabolism | Metabolism > Amino acid metabolism > Glycine metabolism | Metabolis…	Carbamidomethylation; Deamidation (NQ); Oxidation (M)	Homo sapiens	Tmito	0.743694	0.963505	0.892324		6553800	1626500	3643400	3509380	1934780	3936220	3982900	2848830
645	P36957	DLST	Dihydrolipoyllysine-residue succinyltransferase component of 2-oxoglutarate dehydrogenase complex, mitochondrial	11	11	11	11	48755	24.28	210.027	Metabolism > Carbohydrate metabolism > TCA cycle | Metabolism > Amino acid metabolism > Lysine metabolism	Deamidation (NQ); Oxidation (M)	Homo sapiens	Tmito	0.36367	0.908476	1.35308		4744640	2066220	5224630	1622070	3359230	5228620	4052680	3912300
330	O00429	DNM1L	Dynamin-1-like protein	24	24	24	24	81877	43.07	275.026	Mitochondrial dynamics and surveillance > Fission	Acetylation (Protein N-term); Carbamidomethylation; Deamidation (NQ); Oxidation (M)	Homo sapiens	Tmito	0.280011	0.908476	1.49206		3486180	1123510	2734790	1559890	1579690	3939090	3722320	3575200
1323	P23919	DTYMK	Thymidylate kinase	7	7	7	7	23819	37.26	146.106	Metabolism > Nucleotide metabolism > Nucleotide synthesis and processing	Carbamidomethylation	Homo sapiens	Tpossible_mito	0.655684	0.941266	0.872049		1694110	616145	714256	716725	467726	1100320	839155	715554
1258	Q13011	ECH1	Delta(3,5)-Delta(2,4)-dienoyl-CoA isomerase, mitochondrial	7	6	7	6	35816	20.73	140.266	Metabolism > Lipid metabolism	Carbamidomethylation	Homo sapiens	Tmito	0.33158	0.908476	2.31166		458855	1121390	1224050	2001250	396482	2791970	2289840	14200000
791	P30084	ECHS1	Enoyl-CoA hydratase, mitochondrial	10	10	10	10	31387	41.38	215.533	Metabolism > Lipid metabolism > Fatty acid oxidation | Metabolism > Amino acid metabolism > Branched-chain amino acid metabolism | Metabolism > Amino acid metabolism > Lysine metabolism	Carbamidomethylation; Deamidation (NQ)	Homo sapiens	Tmito	0.394627	0.908476	1.21308		5142210	4196330	5355700	3122110	3195390	6049560	5913470	6835170
1961	P42126	ECI1	Enoyl-CoA delta isomerase 1, mitochondrial	2	2	2	2	32816	10.6	115.369	Metabolism > Lipid metabolism > Fatty acid oxidation	Carbamidomethylation; Deamidation (NQ)	Homo sapiens	Tmito	0.178574	0.908476	1.94183		233846	36737.7	160860	68624	151379	166159	201240	266384
1524	O75521	ECI2	Enoyl-CoA delta isomerase 2	5	3	5	3	43585	10.91	113.978	Metabolism > Lipid metabolism > Fatty acid oxidation	Carbamidomethylation	Homo sapiens	Tmito	0.186043	0.908476	188.49		77680.3	0	378545	0	72470.8	131396	32238.7	120909
2039	Q9BUP0	EFHD1	EF-hand domain-containing protein D1	3	3	3	3	26928	14.23	94.2177	Signaling > Calcium homeostasis > EF hand proteins	N/A	Homo sapiens	Tmito	0.734644	0.963505	1.14828		629066	153092	367148	133082	207416	346526	356257	319491
2306	Q08426	EHHADH	Peroxisomal bifunctional enzyme	2	2	2	2	79495	3.87	56.1814	Metabolism > Lipid metabolism	Deamidation (NQ)	Homo sapiens	Tpossible_mito	0.17834	0.908476	4.65146		1526360	989472	490268	34491.8	1002400	575333	6171840	3358820
835	P13804	ETFA	Electron transfer flavoprotein subunit alpha, mitochondrial	13	13	13	13	35080	53.45	235.948	Metabolism > Lipid metabolism > Fatty acid oxidation | Metabolism > Amino acid metabolism > Branched-chain amino acid metabolism | Metabolism > Amino acid metabolism > Lysine metabolism | Metabolism > Amino acid metabolism > Glycine metabolism | Metabolism > Vitamin metabolism > Choline and betaine metabolism | Metabolism > Electron carriers > Q-linked reactions, other	Carbamidomethylation	Homo sapiens	Tmito	0.381172	0.908476	1.51972		3223500	711362	2821350	684594	1913560	2679060	1643130	2804580
922	P38117	ETFB	Electron transfer flavoprotein subunit beta	10	10	10	10	27844	34.12	153.902	Metabolism > Lipid metabolism > Fatty acid oxidation | Metabolism > Amino acid metabolism > Branched-chain amino acid metabolism | Metabolism > Amino acid metabolism > Lysine metabolism | Metabolism > Amino acid metabolism > Glycine metabolism | Metabolism > Vitamin metabolism > Choline and betaine metabolism | Metabolism > Electron carriers > Q-linked reactions, other	Oxidation (M)	Homo sapiens	Tmito	0.328683	0.908476	1.46601		5134310	1284460	4558960	1688270	3046410	4610830	4196750	3977190
1383	O95571	ETHE1	Persulfide dioxygenase ETHE1, mitochondrial	6	6	6	6	27873	40.16	165.851	Metabolism > Sulfur metabolism	Carbamidomethylation	Homo sapiens	Tmito	0.190115	0.908476	1.47968		2449470	863694	1028340	963810	1501040	2199200	1427440	2133130
1816	Q6P587	FAHD1	Acylpyruvase FAHD1, mitochondrial	4	4	4	4	24843	27.23	109.569	Metabolism > Carbohydrate metabolism > TCA-associated	N/A	Homo sapiens	Tmito	0.602331	0.934832	1.2023		329795	93005.5	248753	108589	142284	223148	260886	209006
2304	Q96GK7	FAHD2A	Fumarylacetoacetate hydrolase domain-containing protein 2A	2	2	2	2	34596	7.96	61.5394	0	N/A	Homo sapiens	Tmito	0.888926	1	1.06262		557003	109171	260255	129263	132178	260209	239488	316652
36	P49327	FASN	Fatty acid synthase	88	83	88	83	273427	48.86	408.006	Metabolism > Lipid metabolism	Acetylation (Protein N-term); Carbamidomethylation; Deamidation (NQ); Oxidation (M)	Homo sapiens	Tpossible_mito	0.635101	0.941266	0.830707		93500000	20700000	22200000	35100000	19700000	34200000	32900000	32400000
1284	P14324	FDPS	Farnesyl pyrophosphate synthase	6	6	6	6	48275	21.96	164.558	Metabolism > Lipid metabolism > Cholesterol-associated	Carbamidomethylation; Deamidation (NQ); Oxidation (M)	Homo sapiens	Tpossible_mito	0.370677	0.908476	0.720394		3825740	1813710	2523430	2551550	789048	3229660	2338610	2019030
1297	P22570	FDXR	NADPH:adrenodoxin oxidoreductase, mitochondrial	7	5	7	5	53837	14.66	137.793	Metabolism > Lipid metabolism > Cholesterol, bile acid, steroid synthesis | Metabolism > Metals and cofactors > Heme synthesis and processing | Metabolism > Metals and cofactors > Fe-S cluster biosynthesis | Metabolism > Vitamin metabolism > Vitamin D metabolism	Carbamidomethylation	Homo sapiens	Tmito	0.452629	0.916254	1.44571		644498	107940	543880	387501	400650	507696	341728	921403
338	P07954	FH	Fumarate hydratase, mitochondrial	18	17	18	17	54637	51.76	264.619	Metabolism > Carbohydrate metabolism > TCA cycle	Carbamidomethylation; Deamidation (NQ); Oxidation (M)	Homo sapiens	Tmito	0.579139	0.916254	1.2459		4651580	1124870	4868750	2201040	3195930	5153390	2786450	2944010
2106	Q9Y3D6	FIS1	Mitochondrial fission 1 protein	3	3	3	3	16938	22.37	95.9629	Mitochondrial dynamics and surveillance > Fission	Carbamidomethylation	Homo sapiens	Tmito	0.545552	0.916254	1.26316		314896	177729	465007	111578	245355	372642	190373	424722
635	Q96AY3	FKBP10	Peptidyl-prolyl cis-trans isomerase FKBP10	13	13	13	13	64245	28.35	226.697	Protein import, sorting and homeostasis > Protein homeostasis > Chaperones	Carbamidomethylation; Deamidation (NQ); Oxidation (M)	Homo sapiens	Tmito	0.886832	1	1.05668		5874140	2558230	7130190	2480740	2098910	6297070	4356140	5755730
535	P02794	FTH1	Ferritin heavy chain	12	12	12	12	21226	63.39	250.068	Metabolism > Metals and cofactors > Iron homeostasis	Carbamidomethylation; Deamidation (NQ); Oxidation (M)	Homo sapiens	Tpossible_mito	0.675495	0.941266	1.13713		11200000	6574240	11700000	5886090	4796070	12600000	12200000	11500000
105	P41250	GARS1	Glycine--tRNA ligase	35	35	35	35	83166	56.29	348.77	Mitochondrial central dogma > Translation > mt-tRNA synthetases	Carbamidomethylation; Deamidation (NQ); Oxidation (M)	Homo sapiens	Tpossible_mito	0.704799	0.953931	1.17386		45600000	7561460	18900000	16100000	13400000	26600000	20700000	27000000
1705	Q9HC38	GLOD4	Glyoxalase domain-containing protein 4	4	4	4	4	34793	13.42	115.505	0	Carbamidomethylation	Homo sapiens	Tmito	0.197994	0.908476	1.33978		1238520	878218	933282	1355180	1223930	1115440	1353270	2399230
309	O94925	GLS	Glutaminase kidney isoform, mitochondrial	19	18	19	18	73461	42.3	292.718	Metabolism > Amino acid metabolism > Glutamate metabolism	Carbamidomethylation; Deamidation (NQ); Oxidation (M)	Homo sapiens	Tmito	0.95014	1	1.02653		11700000	3062850	7530510	3221380	3606990	8841820	3901930	7756980
383	P00367	GLUD1	Glutamate dehydrogenase 1, mitochondrial	23	23	7	7	61398	17.03	262.032	Metabolism > Amino acid metabolism > Glutamate metabolism | Metabolism > Amino acid metabolism > GABA metabolism	Carbamidomethylation; Oxidation (M)	Homo sapiens	Tmito	0.548643	0.916254	1.36236		4308030	911280	3333280	807562	1266380	3312710	2885120	3007670
581	P49448	GLUD2	Glutamate dehydrogenase 2, mitochondrial	17	17	1	1	61434	2.33	237.74	Metabolism > Amino acid metabolism > Glutamate metabolism | Metabolism > Amino acid metabolism > GABA metabolism	N/A	Homo sapiens	Tpossible_mito	0.355918	0.908476	0.0850707		19093.3	0	0	0	0	0	0	0
1950	Q9H4A6	GOLPH3	Golgi phosphoprotein 3	3	3	3	3	33811	14.77	84.2035	0	N/A	Homo sapiens	Tmito	0.84701	1	1.14525		23583	3749.97	12168.5	68708.5	11729.9	38161	11907.5	23863.9
631	P00505	GOT2	Aspartate aminotransferase, mitochondrial	15	14	15	14	47518	40.23	220.179	Metabolism > Carbohydrate metabolism > Malate-aspartate shuttle | Metabolism > Amino acid metabolism > Glutamate metabolism | Metabolism > Amino acid metabolism > Glyoxylate metabolism | Metabolism > Amino acid metabolism > Kynurenine metabolism | Metabolism > Sulfur metabolism	Carbamidomethylation; Deamidation (NQ)	Homo sapiens	Tmito	0.324541	0.908476	1.53592		4785820	1123550	4906870	1543130	3024640	5373640	3712960	3754610
882	P43304	GPD2	Glycerol-3-phosphate dehydrogenase, mitochondrial	12	11	12	11	80853	18.29	203.661	Metabolism > Carbohydrate metabolism > Glycerol phosphate shuttle | Metabolism > Electron carriers > Q-linked reactions, other	Carbamidomethylation	Homo sapiens	Tmito	0.973914	1	1.01694		1956560	471421	2281640	588850	554014	2058740	875551	1327170
1331	P07203	GPX1	Glutathione peroxidase 1	5	5	5	5	22057	32.51	153.001	Metabolism > Detoxification > ROS and glutathione metabolism | Metabolism > Detoxification > Selenoproteins	Carbamidomethylation	Homo sapiens	Tmito	0.310461	0.908476	0.722113		788052	636131	1274100	425094	323911	753683	475772	635624
927	Q9UBQ7	GRHPR	Glyoxylate reductase/hydroxypyruvate reductase	7	6	7	6	35668	31.71	203.787	Metabolism > Amino acid metabolism > Glyoxylate metabolism	Carbamidomethylation; Deamidation (NQ)	Homo sapiens	Tmito	0.671951	0.941266	1.21241		2659100	823276	2592290	648636	911021	2561830	1698600	2006310
2975	Q12849	GRSF1	G-rich sequence factor 1	1	1	1	1	53126	4.58	59.3531	Mitochondrial central dogma > mtRNA metabolism > mtRNA granules | Mitochondrial central dogma > mtRNA metabolism > Polycistronic mtRNA processing | Mitochondrial central dogma > mtRNA metabolism > mtRNA stability and decay | Mitochondrial central dogma > Translation > Mitochondrial ribosome assembly	N/A	Homo sapiens	Tmito	0.49068	0.916254	19.9206		48627	0	23471.2	0	0	88424.3	29991.1	67773
1271	P00390	GSR	Glutathione reductase, mitochondrial	6	6	6	6	56257	19.16	141.923	Metabolism > Detoxification > ROS and glutathione metabolism	Carbamidomethylation; Deamidation (NQ)	Homo sapiens	Tmito	0.728614	0.962942	0.845022		1572540	293349	868017	703729	249617	855159	935377	719585
1298	Q9Y2Q3	GSTK1	Glutathione S-transferase kappa 1	6	6	6	6	25497	34.07	143.093	Metabolism > Detoxification > Xenobiotic metabolism	N/A	Homo sapiens	Tmito	0.317939	0.908476	0.745715		515200	896208	1794990	964350	767847	856986	587332	639498
2998	Q8N442	GUF1	Translation factor GUF1, mitochondrial	1	1	1	1	74328	1.79	49.4575	Mitochondrial central dogma > Translation	N/A	Homo sapiens	Tmito	0.943011	1	0.741663		202922	0	94485.9	39875.4	31845.5	228758	0	31754.3
1740	Q16774	GUK1	Guanylate kinase	4	4	4	4	21726	29.95	97.7053	Metabolism > Nucleotide metabolism > Nucleotide synthesis and processing	Acetylation (Protein N-term); Carbamidomethylation	Homo sapiens	Tmito	0.653245	0.941266	1.3623		675752	150974	464207	38225.6	315575	323128	206023	296796
1681	Q16836	HADH	Hydroxyacyl-coenzyme A dehydrogenase, mitochondrial	4	4	4	4	34294	20.7	122.239	Metabolism > Lipid metabolism > Fatty acid oxidation | Metabolism > Amino acid metabolism > Lysine metabolism	Oxidation (M)	Homo sapiens	Tmito	0.404076	0.908476	1.45308		424020	97594.1	460769	119370	286762	349820	271661	372355
203	P40939	HADHA	Trifunctional enzyme subunit alpha, mitochondrial	31	30	31	30	83000	50.98	322.469	Metabolism > Lipid metabolism > Fatty acid oxidation | Metabolism > Lipid metabolism > Cardiolipin synthesis | Metabolism > Amino acid metabolism > Branched-chain amino acid metabolism	Carbamidomethylation; Deamidation (NQ); Oxidation (M)	Homo sapiens	Tmito	0.825252	1	1.06674		12700000	9716220	12600000	4520150	10200000	7151550	13900000	8975120
497	P55084	HADHB	Trifunctional enzyme subunit beta, mitochondrial	17	17	17	17	51294	44.73	236.006	Metabolism > Carbohydrate metabolism > Ketone metabolism | Metabolism > Lipid metabolism > Fatty acid oxidation | Metabolism > Amino acid metabolism > Lysine metabolism	Carbamidomethylation; Deamidation (NQ); Oxidation (M)	Homo sapiens	Tmito	0.693516	0.949973	1.13915		8686860	4069940	3057830	6624990	7393060	5224890	3468110	9002690
1434	Q9NRV9	HEBP1	Heme-binding protein 1	6	6	6	6	21097	41.8	198.991	0	N/A	Homo sapiens	Tmito	0.449602	0.916254	0.782258		3173820	1673120	3571990	1269380	1041290	2185010	2126710	1863280
1233	P31937	HIBADH	3-hydroxyisobutyrate dehydrogenase, mitochondrial	7	7	7	7	35329	26.79	186.907	Metabolism > Amino acid metabolism > Branched-chain amino acid metabolism	Carbamidomethylation	Homo sapiens	Tmito	0.480428	0.916254	0.691104		4189210	5295740	1185530	3223420	3556220	1081440	4333630	1160430
2863	Q9BX68	HINT2	Adenosine 5'-monophosphoramidase HINT2	1	1	1	1	17162	9.82	46.4968	Metabolism > Lipid metabolism > Cholesterol, bile acid, steroid synthesis	N/A	Homo sapiens	Tmito	0.134258	0.908476	0.00390404		0	91263.5	0	47167.8	0	0	0	0
1960	P35914	HMGCL	Hydroxymethylglutaryl-CoA lyase, mitochondrial	3	3	3	3	34360	11.69	114.83	Metabolism > Carbohydrate metabolism > Ketone metabolism | Metabolism > Amino acid metabolism > Branched-chain amino acid metabolism	Carbamidomethylation	Homo sapiens	Tmito	0.329972	0.908476	0.67448		193361	617224	282328	137288	154394	110763	238764	234466
621	Q99714	HSD17B10	3-hydroxyacyl-CoA dehydrogenase type-2	12	11	12	11	26923	72.41	244.152	Mitochondrial central dogma > mtRNA metabolism > mtRNA granules | Mitochondrial central dogma > mtRNA metabolism > Polycistronic mtRNA processing | Mitochondrial central dogma > mtRNA metabolism > mt-tRNA modifications | Metabolism > Lipid metabolism > Fatty acid oxidation | Metabolism > Lipid metabolism > Cholesterol, bile acid, steroid synthesis | Metabolism > Amino acid metabolism > Branched-c…	Carbamidomethylation; Deamidation (NQ); Oxidation (M)	Homo sapiens	Tmito	0.302636	0.908476	1.49796		2571360	545132	1342540	850742	1457720	1898840	1255320	2319900
615	P51659	HSD17B4	Peroxisomal multifunctional enzyme type 2	17	17	17	17	79686	28.94	236.104	Metabolism > Lipid metabolism	Carbamidomethylation	Homo sapiens	Tpossible_mito	0.759646	0.970275	1.14665		2926060	852438	3446840	961397	1047840	1978360	2311030	2982540
1767	Q6YN16	HSDL2	Hydroxysteroid dehydrogenase-like protein 2	4	4	4	4	45395	12.2	105.988	0	Carbamidomethylation	Homo sapiens	Tmito	0.420373	0.908476	14.3578		289663	0	184366	183617	208476	234282	97188	87788
138	P38646	HSPA9	Stress-70 protein, mitochondrial	35	35	35	35	73680	53.9	317.859	Metabolism > Metals and cofactors > Fe-S cluster biosynthesis	Carbamidomethylation; Deamidation (NQ); Oxidation (M)	Homo sapiens	Tmito	0.292847	0.908476	1.21688		49600000	25500000	26500000	30800000	31000000	41900000	42300000	41200000
111	P10809	HSPD1	60 kDa heat shock protein, mitochondrial	39	39	39	39	61055	69.11	372.758	Protein import, sorting and homeostasis > Protein homeostasis > Chaperones	Acetylation (Protein N-term); Carbamidomethylation; Deamidation (NQ); Oxidation (M)	Homo sapiens	Tmito	0.180348	0.908476	1.42923		25500000	12200000	22000000	10900000	20400000	31500000	20100000	24100000
1613	P61604	HSPE1	10 kDa heat shock protein, mitochondrial	5	5	5	5	10932	51.96	138.304	Protein import, sorting and homeostasis > Protein homeostasis > Chaperones	N/A	Homo sapiens	Tmito	0.411287	0.908476	1.48136		3026940	734971	2604030	545212	1686030	2411950	1688460	2215180
1097	Q9NSE4	IARS2	Isoleucine--tRNA ligase, mitochondrial	9	9	9	9	113792	10.28	156.833	Mitochondrial central dogma > Translation > mt-tRNA synthetases	Carbamidomethylation	Homo sapiens	Tmito	0.545563	0.916254	1.46613		955694	74912.2	374170	334841	207671	705147	424472	666755
1753	P14735	IDE	Insulin-degrading enzyme	4	4	4	4	117968	5.2	105.699	Protein import, sorting and homeostasis > Protein homeostasis > Proteases	N/A	Homo sapiens	Tmito	0.323269	0.908476	0.632904		594717	350504	150529	373402	81808.4	284922	255105	316161
369	P48735	IDH2	Isocitrate dehydrogenase [NADP], mitochondrial	21	21	19	19	50909	43.58	265.655	Metabolism > Carbohydrate metabolism > TCA cycle	Carbamidomethylation; Deamidation (NQ); Oxidation (M)	Homo sapiens	Tmito	0.250611	0.908476	1.5595		13600000	4902790	6036260	3204510	5989640	8432570	11800000	12800000
1450	P50213	IDH3A	Isocitrate dehydrogenase [NAD] subunit alpha, mitochondrial	6	6	6	6	39592	20.22	144.501	Metabolism > Carbohydrate metabolism > TCA cycle	Carbamidomethylation	Homo sapiens	Tmito	0.333435	0.908476	1.62253		1259630	301919	1105860	284525	559546	1470480	791064	1274130
1972	O43837	IDH3B	Isocitrate dehydrogenase [NAD] subunit beta, mitochondrial	3	3	3	3	42184	9.87	87.4822	Metabolism > Carbohydrate metabolism > TCA cycle	N/A	Homo sapiens	Tmito	0.375838	0.908476	15.8943		211183	15549.1	125444	0	20929.2	91280.3	89841	153170
2042	Q13907	IDI1	Isopentenyl-diphosphate Delta-isomerase 1	2	2	2	2	26319	13.66	75.5085	Metabolism > Lipid metabolism > Cholesterol-associated	Deamidation (NQ)	Homo sapiens	Tpossible_mito	0.137103	0.908476	230.787		0	0	0	0	0	156305	0	18149.7
292	Q16891	IMMT	MICOS complex subunit MIC60	27	27	27	27	83678	39.97	244.343	Mitochondrial dynamics and surveillance > Cristae formation > MICOS complex	N/A	Homo sapiens	Tmito	0.716016	0.960776	1.11038		7119380	2560750	5672590	2693380	3905770	5879810	4360860	4228040
2339	P26440	IVD	Isovaleryl-CoA dehydrogenase, mitochondrial	2	2	2	2	46651	4.46	62.2712	Metabolism > Amino acid metabolism > Branched-chain amino acid metabolism	N/A	Homo sapiens	Tmito	0.129421	0.908476	4.3549		262391	7047.69	196186	79962.1	275224	327840	231454	499629
847	Q15046	KARS1	Lysine--tRNA ligase	11	10	11	10	68048	16.08	168.4	Mitochondrial central dogma > Translation > mt-tRNA synthetases	Carbamidomethylation	Homo sapiens	Tmito	0.56778	0.916254	1.32769		1706700	312182	770295	766396	400311	1703290	1275670	1123660
3091	P83111	LACTB	Serine beta-lactamase-like protein LACTB, mitochondrial	1	1	1	1	60694	2.74	67.2128	Protein import, sorting and homeostasis > Protein homeostasis > Proteases | Metabolism > Lipid metabolism > Phospholipid metabolism	N/A	Homo sapiens	Tmito	0.537558	0.916254	12.8258		35775.2	0	20877.1	0	0	29408.9	21051.4	32646.3
323	P28838	LAP3	Cytosol aminopeptidase	22	18	22	18	56166	43.74	259.891	Protein import, sorting and homeostasis > Protein homeostasis > Proteases	Carbamidomethylation; Deamidation (NQ)	Homo sapiens	Tmito	0.873067	1	1.05047		6788850	2580830	5254470	2213610	2980780	4493110	5062890	3659650
381	P07195	LDHB	L-lactate dehydrogenase B chain	20	20	19	19	36638	52.69	289.337	Metabolism > Amino acid metabolism > Glyoxylate metabolism	Carbamidomethylation; Deamidation (NQ); Oxidation (M)	Homo sapiens	Tpossible_mito	0.941279	1	1.02467		24400000	8473630	16600000	16400000	8325070	22000000	22000000	15400000
1333	O95202	LETM1	Mitochondrial proton/calcium exchanger protein	7	7	7	7	83354	12.72	158.109	Signaling > Calcium homeostasis > Calcium cycle	Carbamidomethylation	Homo sapiens	Tmito	0.361086	0.908476	1.28102		725166	360999	673539	287040	499050	795197	546956	627916
730	P36776	LONP1	Lon protease homolog, mitochondrial	13	13	13	13	106489	21.38	207.971	Protein import, sorting and homeostasis > Protein homeostasis > Proteases	Carbamidomethylation; Deamidation (NQ)	Homo sapiens	Tmito	0.53643	0.916254	1.56385		2464040	116353	722047	444077	426282	1041750	854285	1449320
422	P42704	LRPPRC	Leucine-rich PPR motif-containing protein, mitochondrial	23	21	23	21	157905	18.87	251.098	Mitochondrial central dogma > mtRNA metabolism > mtRNA stability and decay | Mitochondrial central dogma > Translation	Carbamidomethylation; Oxidation (M)	Homo sapiens	Tmito	0.38596	0.908476	0.567861		2115540	10000000	1380910	674628	717660	1706830	1038070	1611690
2562	O75608	LYPLA1	Acyl-protein thioesterase 1	1	1	1	1	24670	6.09	58.2034	Metabolism > Lipid metabolism | Signaling	Carbamidomethylation	Homo sapiens	Tpossible_mito	0.33766	0.908476	17.3026		72946.3	43497.7	55115	0	71226.1	66740.4	47847.4	68912.3
2607	Q9BQ69	MACROD1	ADP-ribose glycohydrolase MACROD1	1	1	1	1	35505	4.31	71.0644	Signaling	Carbamidomethylation	Homo sapiens	Tmito	0.205924	0.908476	165.446		0	0	21994.8	0	5481.47	49731.6	0	60452.2
1815	Q8NE86	MCU	Calcium uniporter protein, mitochondrial	4	4	4	4	39867	16.81	119.156	Signaling > Calcium homeostasis > Calcium cycle | Small molecule transport > Calcium uniporter	Carbamidomethylation	Homo sapiens	Tmito	0.193259	0.908476	189.037		406472	0	103804	0	23103.7	224921	67112.7	154497
363	P40926	MDH2	Malate dehydrogenase, mitochondrial	18	18	18	18	35503	64.79	277.887	Metabolism > Carbohydrate metabolism > Gluconeogenesis | Metabolism > Carbohydrate metabolism > Malate-aspartate shuttle | Metabolism > Carbohydrate metabolism > TCA cycle	Carbamidomethylation; Deamidation (NQ); Oxidation (M)	Homo sapiens	Tmito	0.669867	0.941266	1.19792		52200000	8520880	23800000	15700000	21100000	35200000	19200000	24000000
2262	P23368	ME2	NAD-dependent malic enzyme, mitochondrial	2	2	2	2	65444	3.94	85.4708	Metabolism > Carbohydrate metabolism > TCA-associated	N/A	Homo sapiens	Tmito	0.551096	0.916254	0.0703199		48776.3	0	41203.9	77536.2	0	137651	0	27681.3
2017	P10620	MGST1	Microsomal glutathione S-transferase 1	3	3	3	3	17599	19.35	135.233	Metabolism > Detoxification > Xenobiotic metabolism | Metabolism > Detoxification > ROS and glutathione metabolism	Carbamidomethylation	Homo sapiens	Tpossible_mito	0.120139	0.908476	0.459424		2052540	3211960	1826500	689757	827476	1258820	1019990	348271
1114	O14880	MGST3	Microsomal glutathione S-transferase 3	5	5	5	5	16516	34.21	185.263	Metabolism > Lipid metabolism > Eicosanoid metabolism	Carbamidomethylation; Deamidation (NQ); Oxidation (M)	Homo sapiens	Tmito	0.974009	1	1.0203		4683680	930084	2336320	336676	1020540	1792480	1830040	1109230
1574	P25325	MPST	3-mercaptopyruvate sulfurtransferase	3	3	3	3	33178	15.15	121.886	Metabolism > Detoxification > Xenobiotic metabolism | Metabolism > Sulfur metabolism	Carbamidomethylation; Deamidation (NQ)	Homo sapiens	Tmito	0.409345	0.908476	1.63086		547192	193860	607983	61421.8	288891	533329	388331	468356
2481	Q9Y3D9	MRPS23	28S ribosomal protein S23, mitochondrial	1	1	1	1	21771	5.26	59.1661	Mitochondrial central dogma > Translation > Mitochondrial ribosome	N/A	Homo sapiens	Tmito	0.110799	0.908476	1.79577		19303.6	14220.6	35391.3	8459.5	35901.5	34938.3	24243.4	28105.5
3035	Q92552	MRPS27	28S ribosomal protein S27, mitochondrial	1	1	1	1	47611	2.66	44.9986	Mitochondrial central dogma > Translation > Mitochondrial ribosome	N/A	Homo sapiens	Tmito	0.468494	0.916254	0.0858327		15690.3	423891	254440	123665	345581	116307	282601	0
2181	P82930	MRPS34	28S ribosomal protein S34, mitochondrial	2	2	2	2	25650	10.09	82.7192	Mitochondrial central dogma > Translation > Mitochondrial ribosome	N/A	Homo sapiens	Tmito	0.142054	0.908476	1.86477		113749	33445.7	83362.2	26429.9	78112.8	89075.7	115749	125851
1160	P00403	MT-CO2	Cytochrome c oxidase subunit 2	4	4	4	4	25565	24.67	139.111	OXPHOS > Complex IV > CIV subunits | OXPHOS > OXPHOS subunits	Deamidation (NQ); Oxidation (M)	Homo sapiens	Tmito	0.840992	1	1.09178		1861710	777450	2068640	379215	1113780	848518	1084170	1574490
2531	P00156	MT-CYB	Cytochrome b	1	1	1	1	42718	2.37	50.1567	OXPHOS > Complex III > CIII subunits | Metabolism > Metals and cofactors > Heme-containing proteins | Metabolism > Electron carriers > Cytochromes | OXPHOS > OXPHOS subunits	N/A	Homo sapiens	Tmito	0.864906	1	2.03532		181277	52435.3	8847.31	0	70283.1	0	121174	169452
2182	Q9NZJ7	MTCH1	Mitochondrial carrier homolog 1	2	2	2	2	41544	5.91	70.8315	Small molecule transport > SLC25A family	N/A	Homo sapiens	Tmito	0.391283	0.908476	2.19389		162045	3873.33	84162.7	25477.1	38713.4	109790	82702.3	88696.5
852	Q9Y6C9	MTCH2	Mitochondrial carrier homolog 2	9	9	9	9	33331	39.6	201.219	Small molecule transport > SLC25A family | Mitochondrial dynamics and surveillance > Fusion	Carbamidomethylation; Deamidation (NQ)	Homo sapiens	Tmito	0.773313	0.977699	0.872365		6232250	1361500	2271300	907922	1112010	2656570	1899630	1805840
2283	Q6UB35	MTHFD1L	Monofunctional C1-tetrahydrofolate synthase, mitochondrial	2	2	2	2	105790	2.25	55.9177	Metabolism > Vitamin metabolism > Folate and 1-C metabolism	N/A	Homo sapiens	Tmito	0.655734	0.941266	1.34401		225434	33643.6	79419.4	19906.2	30170.7	91114.4	94958.4	149879
2765	O75431	MTX2	Metaxin-2	1	1	1	1	29763	8.37	48.0264	Protein import, sorting and homeostasis > Protein import and sorting > SAM | Mitochondrial dynamics and surveillance > Intramitochondrial membrane interactions	N/A	Homo sapiens	Tmito	0.999308	1	1.00398		46701.3	0	47158.8	0	0	63252.1	0	35376.9
3110	Q8NCW5	NAXE	NAD(P)H-hydrate epimerase	1	1	1	1	31675	4.17	56.9071	Metabolism > Metals and cofactors > NAD biosynthesis and metabolism	N/A	Homo sapiens	Tmito	0.349352	0.908476	16.3185		67769.3	37284.1	70334.8	0	53699.7	32636.3	59151.1	121566
1975	O95299	NDUFA10	NADH dehydrogenase [ubiquinone] 1 alpha subcomplex subunit 10, mitochondrial	2	2	2	2	40751	10.42	107.127	OXPHOS > Complex I > CI subunits | OXPHOS > OXPHOS subunits	Deamidation (NQ)	Homo sapiens	Tmito	0.581643	0.916254	1.63869		254985	35025.2	141807	12214.1	66985.9	165659	32234.2	311836
2170	Q9P0J0	NDUFA13	NADH dehydrogenase [ubiquinone] 1 alpha subcomplex subunit 13	2	2	2	2	16698	15.97	71.1932	OXPHOS > Complex I > CI subunits | OXPHOS > OXPHOS subunits	N/A	Homo sapiens	Tmito	0.911104	1	1.02382		774138	438292	999784	687732	548395	730190	697186	918167
1990	O00483	NDUFA4	Cytochrome c oxidase subunit NDUFA4	3	3	3	3	9370	37.04	90.7536	OXPHOS > Complex IV > CIV subunits | OXPHOS > OXPHOS subunits	Carbamidomethylation	Homo sapiens	Tmito	0.369208	0.908476	19.5879		219854	0	335162	58127	158424	49011.5	139463	582298
2924	P56556	NDUFA6	NADH dehydrogenase [ubiquinone] 1 alpha subcomplex subunit 6	1	1	1	1	15137	12.5	47.9806	OXPHOS > Complex I > CI subunits | OXPHOS > OXPHOS subunits	N/A	Homo sapiens	Tmito	0.576131	0.916254	12.0837		85654.5	0	54602.5	0	12123.7	77463.3	0	106176
1831	P51970	NDUFA8	NADH dehydrogenase [ubiquinone] 1 alpha subcomplex subunit 8	4	4	4	4	20105	25.58	106.771	OXPHOS > Complex I > CI subunits | OXPHOS > OXPHOS subunits	Carbamidomethylation	Homo sapiens	Tmito	0.595602	0.932401	1.47723		514847	178695	578188	29464.1	268903	355577	231859	336657
1877	Q16795	NDUFA9	NADH dehydrogenase [ubiquinone] 1 alpha subcomplex subunit 9, mitochondrial	3	3	3	3	42510	13	84.1832	OXPHOS > Complex I > CI subunits | OXPHOS > OXPHOS subunits	N/A	Homo sapiens	Tmito	0.226886	0.908476	0.616786		188204	129552	129430	82977.1	58199.5	144569	121172	37171
2735	Q9P032	NDUFAF4	NADH dehydrogenase [ubiquinone] 1 alpha subcomplex assembly factor 4	1	1	1	1	20266	8	49.0382	OXPHOS > Complex I > CI assembly factors | OXPHOS > OXPHOS assembly factors	N/A	Homo sapiens	Tmito	0.352584	0.908476	14.3743		33556.4	21600.8	70892.6	0	31388.8	40891.5	31278.5	54643.4
2479	O96000	NDUFB10	NADH dehydrogenase [ubiquinone] 1 beta subcomplex subunit 10	1	1	1	1	20777	8.14	62.1388	OXPHOS > Complex I > CI subunits | OXPHOS > OXPHOS subunits	N/A	Homo sapiens	Tmito	0.868369	1	1.11521		444668	151188	456023	37043.5	181230	285210	117050	290341
2219	P17568	NDUFB7	NADH dehydrogenase [ubiquinone] 1 beta subcomplex subunit 7	2	1	2	1	16402	7.3	63.4882	OXPHOS > Complex I > CI subunits | OXPHOS > OXPHOS subunits	N/A	Homo sapiens	Tmito	0.998986	1	0.995027		0	0	42266.4	0	0	41431.9	0	0
2368	O95169	NDUFB8	NADH dehydrogenase [ubiquinone] 1 beta subcomplex subunit 8, mitochondrial	2	2	2	2	21766	12.37	74.1608	OXPHOS > Complex I > CI subunits | OXPHOS > OXPHOS subunits	N/A	Homo sapiens	Tmito	0.165815	0.908476	260.777		178281	0	225302	0	104593	159318	82514.5	135098
1689	Q9Y6M9	NDUFB9	NADH dehydrogenase [ubiquinone] 1 beta subcomplex subunit 9	4	4	4	4	21831	32.4	116.705	OXPHOS > Complex I > CI subunits | OXPHOS > OXPHOS subunits	Acetylation (Protein N-term)	Homo sapiens	Tmito	0.32081	0.908476	0.401109		3524700	4401670	5479040	5168050	160724	6730490	2421720	4340790
2827	O95298	NDUFC2	NADH dehydrogenase [ubiquinone] 1 subunit C2	1	1	1	1	14188	10.08	61.4574	OXPHOS > Complex I > CI subunits | OXPHOS > OXPHOS subunits	N/A	Homo sapiens	Tmito	0.887234	1	0.561347		110611	92370.7	68622.9	0	0	49555.7	64468.7	21791.4
1034	P28331	NDUFS1	NADH-ubiquinone oxidoreductase 75 kDa subunit, mitochondrial	9	8	9	8	79467	16.64	185.461	OXPHOS > Complex I > CI subunits | Metabolism > Metals and cofactors > Fe-S-containing proteins | OXPHOS > OXPHOS subunits	Carbamidomethylation	Homo sapiens	Tmito	0.421422	0.908476	1.81983		511207	121302	367181	37510.5	280574	521661	116083	551336
1983	O75306	NDUFS2	NADH dehydrogenase [ubiquinone] iron-sulfur protein 2, mitochondrial	3	3	3	3	52546	10.58	108.687	OXPHOS > Complex I > CI subunits | Metabolism > Metals and cofactors > Fe-S-containing proteins | OXPHOS > OXPHOS subunits	N/A	Homo sapiens	Tmito	0.991041	1	0.9967		6636470	2584040	3434960	2679490	2293310	5018610	3045160	4444390
1576	O75489	NDUFS3	NADH dehydrogenase [ubiquinone] iron-sulfur protein 3, mitochondrial	5	5	5	5	30242	19.7	154.504	OXPHOS > Complex I > CI subunits | OXPHOS > OXPHOS subunits	N/A	Homo sapiens	Tmito	0.371869	0.908476	21.9688		542985	112128	583565	0	306873	370998	195195	372403
3021	O43920	NDUFS5	NADH dehydrogenase [ubiquinone] iron-sulfur protein 5	1	1	1	1	12517	11.32	50.5619	OXPHOS > Complex I > CI subunits | OXPHOS > OXPHOS subunits	Carbamidomethylation	Homo sapiens	Tmito	0.937716	1	0.718274		40648.1	0	19539.1	0	7636.12	27684.3	0	0
2272	O75251	NDUFS7	NADH dehydrogenase [ubiquinone] iron-sulfur protein 7, mitochondrial	2	2	2	2	23564	10.8	74.513	OXPHOS > Complex I > CI subunits | Metabolism > Metals and cofactors > Fe-S-containing proteins | OXPHOS > OXPHOS subunits	Oxidation (M)	Homo sapiens	Tmito	0.743369	0.963505	1.25433		326366	104926	127139	15039.3	100717	91913.6	102396	170994
1996	O00217	NDUFS8	NADH dehydrogenase [ubiquinone] iron-sulfur protein 8, mitochondrial	3	2	3	2	23705	12.86	119.512	OXPHOS > Complex I > CI subunits | Metabolism > Metals and cofactors > Fe-S-containing proteins | OXPHOS > OXPHOS subunits	Carbamidomethylation	Homo sapiens	Tmito	0.213282	0.908476	2.31874		126094	56078.8	132557	13905.1	126887	79525.9	116036	321779
1993	P49821	NDUFV1	NADH dehydrogenase [ubiquinone] flavoprotein 1, mitochondrial	3	3	3	3	50817	10.13	99.3769	OXPHOS > Complex I > CI subunits | Metabolism > Metals and cofactors > Fe-S-containing proteins | OXPHOS > OXPHOS subunits	N/A	Homo sapiens	Tmito	0.309049	0.908476	32.2381		618670	108908	209202	0	240520	269397	405968	578802
2419	P19404	NDUFV2	NADH dehydrogenase [ubiquinone] flavoprotein 2, mitochondrial	2	2	2	2	27392	9.24	59.8627	OXPHOS > Complex I > CI subunits | Metabolism > Metals and cofactors > Fe-S-containing proteins | OXPHOS > OXPHOS subunits	N/A	Homo sapiens	Tmito	0.610886	0.93955	1.53071		141783	43756.9	223611	6689.59	81831.2	112314	60473	91668.3
2327	Q9BPW8	NIPSNAP1	Protein NipSnap homolog 1	2	2	2	2	33310	8.1	85.9195	Mitochondrial dynamics and surveillance > Mitophagy | Mitochondrial dynamics and surveillance > Autophagy	Oxidation (M)	Homo sapiens	Tmito	0.388011	0.908476	0.0592455		57190.3	63048	217231	415694	238914	154356	0	108779
2295	O75323	NIPSNAP2	Protein NipSnap homolog 2	2	1	2	1	33743	3.15	65.3018	Mitochondrial dynamics and surveillance > Mitophagy | Mitochondrial dynamics and surveillance > Autophagy	N/A	Homo sapiens	Tmito	0.355918	0.908476	15.5241		0	0	0	0	0	0	58080.6	0
1833	Q9UFN0	NIPSNAP3A	Protein NipSnap homolog 3A	4	4	4	4	28467	24.7	117.24	0	N/A	Homo sapiens	Tmito	0.373287	0.908476	1.92694		453023	38987.5	149973	29942.4	90147.3	167605	273709	264416
1959	Q9NQR4	NIT2	Omega-amidase NIT2	3	3	3	3	30608	13.41	109.661	Metabolism > Detoxification	Carbamidomethylation	Homo sapiens	Tpossible_mito	0.934316	1	0.914518		359233	23668.6	131122	688605	16750.6	306135	347659	301207
1845	Q9BYT8	NLN	Neurolysin, mitochondrial	4	3	4	3	80652	5.26	101.034	Protein import, sorting and homeostasis > Protein homeostasis > Proteases	N/A	Homo sapiens	Tmito	0.706874	0.953931	1.29994		467448	34684.4	238718	114437	65588.4	331300	212906	273385
956	Q13423	NNT	NAD(P) transhydrogenase, mitochondrial	11	9	11	9	113896	11.51	197.017	Metabolism > Metals and cofactors > NAD biosynthesis and metabolism	Carbamidomethylation	Homo sapiens	Tmito	0.518548	0.916254	0.704224		2757590	303140	663458	540355	314028	782740	451644	663937
1665	O43847	NRDC	Nardilysin	4	4	4	4	131701	3.65	95.6622	Protein import, sorting and homeostasis > Protein homeostasis > Chaperones | Protein import, sorting and homeostasis > Protein import and sorting	Carbamidomethylation	Homo sapiens	Tpossible_mito	0.150567	0.908476	0.758839		565058	306289	271372	309772	264347	283290	245867	262012
3149	P50583	NUDT2	Bis(5'-nucleosyl)-tetraphosphatase [asymmetrical]	1	1	1	1	16829	5.44	49.4507	Metabolism > Nucleotide metabolism > Nucleotide synthesis and processing	Carbamidomethylation	Homo sapiens	Tpossible_mito	0.955872	1	0.787199		39980.6	0	26707.4	0	0	21650.3	18938.9	0
751	P04181	OAT	Ornithine aminotransferase, mitochondrial	13	13	13	13	48535	38.04	223.055	Metabolism > Amino acid metabolism > Proline metabolism	N/A	Homo sapiens	Tmito	0.838752	1	0.907914		3888840	1451110	2756540	873195	832992	2434310	1353980	3361590
3135	Q9NX40	OCIAD1	OCIA domain-containing protein 1	1	1	1	1	27626	5.31	76.321	0	Carbamidomethylation	Homo sapiens	Tmito	0.355918	0.908476	12.8812		0	0	0	0	0	27530.9	0	0
707	Q02218	OGDH	2-oxoglutarate dehydrogenase complex component E1	14	13	9	9	115935	10.85	192.365	Metabolism > Carbohydrate metabolism > TCA cycle	Carbamidomethylation; Deamidation (NQ)	Homo sapiens	Tmito	0.974911	1	1.01315		1396050	285497	794754	398419	351785	735601	747985	686990
1427	Q9ULD0	OGDHL	2-oxoglutarate dehydrogenase-like, mitochondrial	6	5	1	1	114481	0.69	123.455	Metabolism > Carbohydrate metabolism > TCA cycle	N/A	Homo sapiens	Tmito	0.13526	0.908476	586.829		0	0	0	0	153541	0	0	772365
1718	O60313	OPA1	Dynamin-like 120 kDa protein, mitochondrial	4	3	4	3	111631	3.85	123.224	Mitochondrial dynamics and surveillance > Fusion | Mitochondrial dynamics and surveillance > Cristae formation	N/A	Homo sapiens	Tmito	0.726264	0.962942	0.658263		672142	30096.7	422911	6476750	162083	642911	378141	264024
1664	P55809	OXCT1	Succinyl-CoA:3-ketoacid coenzyme A transferase 1, mitochondrial	5	5	5	5	56158	19.04	158.791	Metabolism > Carbohydrate metabolism > Ketone metabolism	N/A	Homo sapiens	Tmito	0.352803	0.908476	19.1206		314659	0	86333.8	35902.5	66927.5	271915	62474.6	114660
462	P22234	PAICS	Bifunctional phosphoribosylaminoimidazole carboxylase/phosphoribosylaminoimidazole succinocarboxamide synthetase	16	15	16	15	47079	43.29	249.366	Metabolism > Nucleotide metabolism > Nucleotide synthesis and processing	Acetylation (Protein N-term); Carbamidomethylation; Deamidation (NQ); Oxidation (M)	Homo sapiens	Tmito	0.797871	0.989812	1.08034		4412060	1415760	2147510	2549150	1626370	3486320	2675850	3070040
937	Q99497	PARK7	Parkinson disease protein 7	9	9	9	9	19891	61.38	238.514	Protein import, sorting and homeostasis > Protein homeostasis | Mitochondrial dynamics and surveillance > Mitophagy | Mitochondrial dynamics and surveillance > Autophagy	Carbamidomethylation	Homo sapiens	Tmito	0.641256	0.941266	1.10732		6699710	3241160	6247370	3889240	3953180	6574100	5296450	5762830
2591	P11498	PC	Pyruvate carboxylase, mitochondrial	1	1	1	1	129634	0.85	47.4907	Metabolism > Carbohydrate metabolism > Gluconeogenesis | Metabolism > Carbohydrate metabolism > TCA-associated | Metabolism > Vitamin metabolism > Biotin utilizing proteins	N/A	Homo sapiens	Tmito	0.355918	0.908476	15.0148		0	0	0	0	0	0	0	50824.5
2695	P05165	PCCA	Propionyl-CoA carboxylase alpha chain, mitochondrial	1	1	1	1	80059	1.37	57.2358	Metabolism > Carbohydrate metabolism > Propanoate metabolism | Metabolism > Lipid metabolism > Fatty acid oxidation | Metabolism > Vitamin metabolism > Biotin utilizing proteins	N/A	Homo sapiens	Tmito	0.870329	1	2.09721		401267	176025	18959.7	0	109228	0	665418	356430
385	Q16822	PCK2	Phosphoenolpyruvate carboxykinase [GTP], mitochondrial	21	21	21	21	70699	42.66	271.452	Metabolism > Carbohydrate metabolism > Gluconeogenesis | Metabolism > Carbohydrate metabolism > TCA-associated	Carbamidomethylation; Oxidation (M)	Homo sapiens	Tmito	0.177873	0.908476	1.78295		5732120	1458690	6133650	2366360	4188030	5487510	6305450	8463230
1551	P08559	PDHA1	Pyruvate dehydrogenase E1 component subunit alpha, somatic form, mitochondrial	5	4	5	4	43296	9.49	109.823	Metabolism > Carbohydrate metabolism > Pyruvate metabolism	N/A	Homo sapiens	Tmito	0.707288	0.953931	0.882306		382778	114785	245012	165614	104225	222377	215667	216146
1618	P11177	PDHB	Pyruvate dehydrogenase E1 component subunit beta, mitochondrial	5	5	5	5	39233	17.27	137.852	Metabolism > Carbohydrate metabolism > Pyruvate metabolism	Oxidation (M)	Homo sapiens	Tmito	0.3851	0.908476	1.58857		858163	138262	499426	119885	380335	608813	410625	475821
2855	O96011	PEX11B	Peroxisomal membrane protein 11B	1	1	1	1	28431	3.47	42.8204	0	N/A	Homo sapiens	Tpossible_mito	0.560486	0.916254	1.26128		10639.8	12169.6	47732.2	11484.8	16579.7	28300.5	18521.2	20670.4
479	P35232	PHB1	Prohibitin 1	19	19	19	19	29804	82.72	270.989	Protein import, sorting and homeostasis > Protein homeostasis > Chaperones	Carbamidomethylation; Deamidation (NQ)	Homo sapiens	Tmito	0.722527	0.962942	0.926797		14700000	10400000	19100000	8665090	10100000	15100000	9714640	12600000
410	Q99623	PHB2	Prohibitin-2	15	15	15	15	33296	55.18	255.714	Protein import, sorting and homeostasis > Protein homeostasis > Chaperones	Deamidation (NQ); Oxidation (M)	Homo sapiens	Tmito	0.985387	1	0.995249		13800000	7743990	11800000	5003480	7207580	11300000	7862280	9667380
864	Q5JRX3	PITRM1	Presequence protease, mitochondrial	12	11	12	11	117413	14.46	200.625	Protein import, sorting and homeostasis > Protein homeostasis > Proteases	Carbamidomethylation	Homo sapiens	Tmito	0.316697	0.908476	0.574119		1150800	630529	1567080	229274	296202	561197	224455	759141
1205	Q9NRY6	PLSCR3	Phospholipid scramblase 3	6	6	6	6	31648	28.81	211.05	Metabolism > Lipid metabolism > Cardiolipin synthesis	Carbamidomethylation; Deamidation (NQ)	Homo sapiens	Tpossible_mito	0.3948	0.908476	2.74007		1352320	694310	3163240	1030920	873579	1843250	1302420	82300000
2379	O75439	PMPCB	Mitochondrial-processing peptidase subunit beta	2	2	1	1	54366	2.25	68.3781	Protein import, sorting and homeostasis > Protein import and sorting > Preprotein cleavage | Protein import, sorting and homeostasis > Protein homeostasis > Proteases	N/A	Homo sapiens	Tmito	0.398461	0.908476	12.3613		101038	0	50430.8	46059.5	37178.5	70671.9	40626.3	51335.2
2072	Q9NVS9	PNPO	Pyridoxine-5'-phosphate oxidase	3	3	3	3	29988	16.48	89.1173	Metabolism > Vitamin metabolism > Vitamin B6 metabolism	Carbamidomethylation	Homo sapiens	Tmito	0.42625	0.911412	1.52884		405013	387715	476986	68204.6	366139	252562	477441	632142
1564	Q9H2U2	PPA2	Inorganic pyrophosphatase 2, mitochondrial	5	4	4	3	37920	9.88	141.792	Mitochondrial central dogma > mtDNA maintenance | Mitochondrial central dogma > mtRNA metabolism | Mitochondrial central dogma > Translation | Metabolism > Nucleotide metabolism	N/A	Homo sapiens	Tmito	0.965514	1	0.973933		652578	55148.3	384977	142474	116155	285859	192362	278061
592	P32119	PRDX2	Peroxiredoxin-2	14	13	13	12	21892	62.63	235.155	Metabolism > Detoxification > ROS and glutathione metabolism	Carbamidomethylation; Deamidation (NQ)	Homo sapiens	Tmito	0.975952	1	0.989335		14800000	11300000	7226440	4322140	4497700	10100000	10200000	10800000
933	P30048	PRDX3	Thioredoxin-dependent peroxide reductase, mitochondrial	8	8	8	8	27693	41.02	212.239	Metabolism > Detoxification > ROS and glutathione metabolism	Carbamidomethylation; Deamidation (NQ); Oxidation (M)	Homo sapiens	Tmito	0.631969	0.941266	1.14799		8427790	2533320	6332050	3636200	4861960	5941010	5526790	5348180
505	Q13162	PRDX4	Peroxiredoxin-4	14	14	11	11	30540	57.56	266.001	Metabolism > Detoxification > ROS and glutathione metabolism	Carbamidomethylation; Deamidation (NQ)	Homo sapiens	Tmito	0.74296	0.963505	0.879897		13200000	3499810	15400000	4853680	6303440	7167960	7944580	5766240
891	P30044	PRDX5	Peroxiredoxin-5, mitochondrial	10	10	10	10	22086	56.07	218.586	Metabolism > Detoxification > ROS and glutathione metabolism	Carbamidomethylation; Deamidation (NQ); Oxidation (M)	Homo sapiens	Tmito	0.517938	0.916254	0.750517		22000000	14100000	6726440	14800000	13400000	6887080	4847830	21900000
407	P30041	PRDX6	Peroxiredoxin-6	20	20	20	20	25035	81.25	294.607	Metabolism > Lipid metabolism > Phospholipid metabolism | Metabolism > Detoxification > ROS and glutathione metabolism	Carbamidomethylation; Deamidation (NQ); Oxidation (M)	Homo sapiens	Tpossible_mito	0.895954	1	0.947724		43600000	11100000	20700000	15400000	9357660	22200000	18100000	33100000
2222	P17612	PRKACA	cAMP-dependent protein kinase catalytic subunit alpha	2	1	1	1	40590	6.84	85.5592	Signaling > cAMP-PKA signaling	N/A	Homo sapiens	Tpossible_mito	0.166544	0.908476	0.00695321		73660.4	37757.8	50988.5	6998.57	0	57064	40654	0
1562	Q9H7Z7	PTGES2	Prostaglandin E synthase 2	4	4	4	4	41943	17.24	109.098	Metabolism > Lipid metabolism > Eicosanoid metabolism	Deamidation (NQ)	Homo sapiens	Tmito	0.393704	0.908476	1.71632		282157	24444.4	219019	89759.4	122338	300359	147019	217796
2686	Q9Y3E5	PTRH2	Peptidyl-tRNA hydrolase 2, mitochondrial	1	1	1	1	19194	8.38	72.4178	0	N/A	Homo sapiens	Tmito	0.663737	0.941266	1.19076		213199	90886.7	144808	48243.4	82375.2	178933	98272.6	187885
1541	P32322	PYCR1	Pyrroline-5-carboxylate reductase 1, mitochondrial	5	5	4	4	33361	17.87	150.893	Metabolism > Amino acid metabolism > Proline metabolism	Acetylation (Protein N-term)	Homo sapiens	Tmito	0.483977	0.916254	1.91976		975752	38775.2	337708	66402.8	155128	536496	146030	948227
2255	Q96C36	PYCR2	Pyrroline-5-carboxylate reductase 2	2	2	1	1	33637	5	96.9193	Metabolism > Amino acid metabolism > Proline metabolism	Acetylation (Protein N-term)	Homo sapiens	Tmito	0.227768	0.908476	158.533		55073.7	0	0	0	0	36516.1	21350.7	44620.2
1666	P09417	QDPR	Dihydropteridine reductase	4	3	4	3	25789	16.8	127.972	Metabolism > Metals and cofactors > Tetrahydrobiopterin synthesis | Metabolism > Vitamin metabolism > Folate and 1-C metabolism	Carbamidomethylation	Homo sapiens	Tmito	0.218408	0.908476	2.19488		707100	142467	224327	191049	146935	796754	821788	1041480
2458	Q9HBH5	RDH14	Retinol dehydrogenase 14	1	1	1	1	36865	3.87	42.5175	Metabolism > Vitamin metabolism > Vitamin A metabolism	N/A	Homo sapiens	Tpossible_mito	0.495156	0.916254	10.6473		0	0	3384.47	0	0	4013.51	0	10837.2
1345	Q9Y3B8	REXO2	Oligoribonuclease, mitochondrial	5	4	5	4	26833	24.05	153.833	Mitochondrial central dogma > mtRNA metabolism > mtRNA stability and decay	Carbamidomethylation; Deamidation (NQ)	Homo sapiens	Tmito	0.759988	0.970275	1.12305		1443030	628251	1498960	836159	523743	2031190	1560540	1088770
2446	P52758	RIDA	2-iminobutanoate/2-iminopropanoate deaminase	2	2	2	2	14494	18.98	74.3351	0	N/A	Homo sapiens	Tmito	0.333372	0.908476	2.0144		56989.5	34466.2	147967	29696.9	128710	24865.5	118615	374364
1374	Q96DB5	RMDN1	Regulator of microtubule dynamics protein 1	5	5	5	5	35808	19.11	128.423	0	N/A	Homo sapiens	Tmito	0.307922	0.908476	28.209		191269	46169.4	293017	0	92001.3	375364	234955	201934
1417	Q9Y512	SAMM50	Sorting and assembly machinery component 50 homolog	6	5	6	5	51976	11.94	119.51	Protein import, sorting and homeostasis > Protein import and sorting > SAM | Mitochondrial dynamics and surveillance > Intramitochondrial membrane interactions	Carbamidomethylation	Homo sapiens	Tmito	0.47516	0.916254	0.868484		759785	599331	466372	434963	357524	586395	406448	616720
1116	P22307	SCP2	Sterol carrier protein 2	8	8	8	8	58994	13.35	147.764	Metabolism > Lipid metabolism > Cholesterol, bile acid, steroid synthesis	Carbamidomethylation; Deamidation (NQ); Oxidation (M)	Homo sapiens	Tpossible_mito	0.645309	0.941266	1.33012		436859	268974	2743850	237624	864913	964588	475745	604190
1348	P31040	SDHA	Succinate dehydrogenase [ubiquinone] flavoprotein subunit, mitochondrial	6	6	6	6	72692	13.4	164.914	OXPHOS > Complex II > CII subunits | Metabolism > Carbohydrate metabolism > TCA cycle | OXPHOS > OXPHOS subunits	Carbamidomethylation; Deamidation (NQ)	Homo sapiens	Tmito	0.340507	0.908476	1.76601		1329860	238089	387118	113126	437951	635332	484993	999454
1968	P21912	SDHB	Succinate dehydrogenase [ubiquinone] iron-sulfur subunit, mitochondrial	3	3	3	3	31630	11.79	117.863	OXPHOS > Complex II > CII subunits | Metabolism > Carbohydrate metabolism > TCA cycle | Metabolism > Metals and cofactors > Fe-S-containing proteins | OXPHOS > OXPHOS subunits	N/A	Homo sapiens	Tmito	0.252761	0.908476	2.32879		767267	104250	828085	66192.9	470905	596251	578165	794354
987	Q9H9B4	SFXN1	Sideroflexin-1	7	7	5	5	35619	19.57	143.515	Metabolism > Amino acid metabolism > Serine metabolism | Metabolism > Vitamin metabolism > Folate and 1-C metabolism | Small molecule transport > Sideroflexins	N/A	Homo sapiens	Tmito	0.336186	0.908476	1.48728		2802820	2316640	1114230	1328860	2997750	1194660	2452080	5356840
935	Q9BWM7	SFXN3	Sideroflexin-3	10	9	8	8	35503	35.51	190.321	Metabolism > Amino acid metabolism > Serine metabolism | Metabolism > Vitamin metabolism > Folate and 1-C metabolism | Small molecule transport > Sideroflexins	N/A	Homo sapiens	Tpossible_mito	0.776955	0.977699	1.15865		2528670	248032	723394	634975	769802	869610	631252	1228670
436	P34897	SHMT2	Serine hydroxymethyltransferase, mitochondrial	18	18	18	18	55993	46.23	261.624	Metabolism > Amino acid metabolism > Serine metabolism | Metabolism > Amino acid metabolism > Glycine metabolism | Metabolism > Vitamin metabolism > Folate and 1-C metabolism	Carbamidomethylation; Deamidation (NQ); Oxidation (M)	Homo sapiens	Tmito	0.311193	0.908476	1.57852		8109950	1588230	4710060	2392700	3177960	6641110	5308550	8044210
1791	P53007	SLC25A1	Tricarboxylate transport protein, mitochondrial	4	4	4	4	34013	14.79	110.16	Metabolism > Carbohydrate metabolism > Gluconeogenesis | Metabolism > Carbohydrate metabolism > TCA-associated | Metabolism > Lipid metabolism | Small molecule transport > SLC25A family	Carbamidomethylation	Homo sapiens	Tmito	0.843294	1	1.1361		1668840	172381	336676	151884	180344	525158	397228	651418
1265	Q02978	SLC25A11	Mitochondrial 2-oxoglutarate/malate carrier protein	7	7	7	7	34062	25.8	153.79	Metabolism > Carbohydrate metabolism > Gluconeogenesis | Metabolism > Carbohydrate metabolism > Malate-aspartate shuttle | Metabolism > Carbohydrate metabolism > TCA-associated | Small molecule transport > SLC25A family	Acetylation (Protein N-term)	Homo sapiens	Tmito	0.541894	0.916254	1.67256		1321740	46714.8	245347	118111	118899	507614	388307	597468
2091	O75746	SLC25A12	Electrogenic aspartate/glutamate antiporter SLC25A12, mitochondrial	3	3	1	1	74762	2.21	88.34	Metabolism > Carbohydrate metabolism > Malate-aspartate shuttle | Metabolism > Amino acid metabolism > Glutamate metabolism | Signaling > Calcium homeostasis > EF hand proteins | Small molecule transport > SLC25A family	N/A	Homo sapiens	Tmito	0.934732	1	0.751136		22794.4	0	0	0	7256.12	0	0	0
3077	Q9H936	SLC25A22	Mitochondrial glutamate carrier 1	1	1	1	1	34470	4.64	59.9365	Small molecule transport > SLC25A family	Carbamidomethylation	Homo sapiens	Tmito	0.979509	1	0.908934		29041.2	0	0	0	0	19821.8	0	0
3099	Q9BV35	SLC25A23	Calcium-binding mitochondrial carrier protein SCaMC-3	1	1	1	1	52378	2.35	47.9262	Metabolism > Nucleotide metabolism > Nucleotide import | Signaling > Calcium homeostasis > EF hand proteins | Small molecule transport > SLC25A family	Deamidation (NQ)	Homo sapiens	Tmito	0.857551	1	0.741988		12154.8	288764	903304	7339810	3266570	287705	120588	62237.4
457	Q6NUK1	SLC25A24	Calcium-binding mitochondrial carrier protein SCaMC-1	18	17	18	17	53354	42.14	238.359	Metabolism > Nucleotide metabolism > Nucleotide import | Signaling > Calcium homeostasis > EF hand proteins | Small molecule transport > SLC25A family	Carbamidomethylation; Oxidation (M)	Homo sapiens	Tmito	0.420192	0.908476	1.41191		4465630	1066880	2754900	1045570	1769550	3832110	2443460	3291430
1099	Q00325	SLC25A3	Phosphate carrier protein, mitochondrial	9	9	9	9	40095	19.61	169.305	Metabolism > Metals and cofactors > Copper metabolism | Signaling > Calcium homeostasis > Calcium cycle | Small molecule transport > SLC25A family	Oxidation (M)	Homo sapiens	Tmito	0.667638	0.941266	1.22981		11400000	1583960	5132490	2305550	3221370	5328200	4852770	5867970
701	P12235	SLC25A4	ADP/ATP translocase 1	12	12	1	1	33064	3.02	240.075	Metabolism > Nucleotide metabolism > Nucleotide import | Signaling > Calcium homeostasis > Mitochondrial permeability transition pore | Small molecule transport > SLC25A family	N/A	Homo sapiens	Tmito	0.97845	1	0.884128		54186.4	0	47388	0	0	31092.9	0	50461.2
637	P05141	SLC25A5	ADP/ATP translocase 2	15	15	5	5	32852	19.13	219.583	Metabolism > Nucleotide metabolism > Nucleotide import | Signaling > Calcium homeostasis > Mitochondrial permeability transition pore | Small molecule transport > SLC25A family	Acetylation (Protein N-term); Carbamidomethylation; Oxidation (M)	Homo sapiens	Tmito	0.929093	1	1.04496		5901300	844228	1809240	1027380	1079440	2528280	2051100	1972490
512	P12236	SLC25A6	ADP/ATP translocase 3	16	14	3	3	32866	9.4	265.36	Metabolism > Nucleotide metabolism > Nucleotide import | Signaling > Calcium homeostasis > Mitochondrial permeability transition pore | Small molecule transport > SLC25A family	Acetylation (Protein N-term)	Homo sapiens	Tmito	0.768576	0.9765	1.16205		5560180	738410	1815900	712406	1577670	1989550	1592240	1937890
209	Q7KZF4	SND1	Staphylococcal nuclease domain-containing protein 1	30	30	30	30	101997	40.99	296.152	0	Acetylation (Protein N-term); Carbamidomethylation; Deamidation (NQ); Oxidation (M)	Homo sapiens	Tmito	0.985453	1	0.991023		12900000	1863950	5153930	4987310	2426460	6670480	4623320	7966740
1118	P00441	SOD1	Superoxide dismutase [Cu-Zn]	7	7	7	7	15936	73.38	163.904	Metabolism > Detoxification > ROS and glutathione metabolism	Carbamidomethylation; Deamidation (NQ)	Homo sapiens	Tmito	0.180066	0.908476	1.90922		1149610	332676	1415710	918784	821419	3173990	1407960	1800630
660	P04179	SOD2	Superoxide dismutase [Mn], mitochondrial	11	10	11	10	24750	50.9	231.015	Metabolism > Detoxification > ROS and glutathione metabolism	Deamidation (NQ)	Homo sapiens	Tmito	0.133511	0.908476	1.84946		2079650	2702130	6620280	2031800	3053690	6942120	8365710	4986710
2424	P35270	SPR	Sepiapterin reductase	2	2	2	2	28048	13.03	131.856	Metabolism > Metals and cofactors > Tetrahydrobiopterin synthesis	N/A	Homo sapiens	Tpossible_mito	0.604264	0.934832	0.738704		139568	34912.3	268466	33313.6	44347.6	105516	56124.9	49410
893	Q9Y6N5	SQOR	Sulfide:quinone oxidoreductase, mitochondrial	11	11	11	11	49961	32.22	184.929	Metabolism > Electron carriers > Q-linked reactions, other | Metabolism > Sulfur metabolism	Carbamidomethylation	Homo sapiens	Tmito	0.326871	0.908476	1.77116		2434460	488086	1732390	623007	1711520	1598060	889454	5187670
1478	Q04837	SSBP1	Single-stranded DNA-binding protein, mitochondrial	5	5	5	5	17260	43.24	171.532	Mitochondrial central dogma > mtDNA maintenance > mtDNA replication | Mitochondrial central dogma > mtDNA maintenance > mtDNA nucleoid	N/A	Homo sapiens	Tmito	0.550383	0.916254	1.1812		1022660	459830	1381370	1188980	1292850	1238430	844298	1112220
781	Q9UJZ1	STOML2	Stomatin-like protein 2, mitochondrial	13	13	13	13	38534	51.97	237.599	Protein import, sorting and homeostasis > Protein homeostasis	Carbamidomethylation	Homo sapiens	Tmito	0.346989	0.908476	1.56126		3364200	795906	3816750	951230	2139810	4171150	2352310	2751060
1836	Q9P2R7	SUCLA2	Succinate--CoA ligase [ADP-forming] subunit beta, mitochondrial	4	4	4	4	50317	8.64	88.1774	Metabolism > Carbohydrate metabolism > TCA cycle | Metabolism > Carbohydrate metabolism > Itaconate metabolism | Metabolism > Nucleotide metabolism > Nucleotide synthesis and processing	N/A	Homo sapiens	Tmito	0.32066	0.908476	26.6085		542103	0	125288	56770.7	139822	270600	182835	279403
1734	P53597	SUCLG1	Succinate--CoA ligase [ADP/GDP-forming] subunit alpha, mitochondrial	3	3	3	3	36250	11.56	134.369	Metabolism > Carbohydrate metabolism > TCA cycle | Metabolism > Carbohydrate metabolism > Itaconate metabolism | Metabolism > Nucleotide metabolism > Nucleotide synthesis and processing	Carbamidomethylation; Deamidation (NQ)	Homo sapiens	Tpossible_mito	0.404027	0.908476	1.38295		1154770	277358	1114710	449091	790353	1125250	794976	829542
1139	Q96I99	SUCLG2	Succinate--CoA ligase [GDP-forming] subunit beta, mitochondrial	8	8	8	8	46511	21.99	145.927	Metabolism > Carbohydrate metabolism > TCA cycle | Metabolism > Carbohydrate metabolism > Itaconate metabolism | Metabolism > Nucleotide metabolism > Nucleotide synthesis and processing	N/A	Homo sapiens	Tmito	0.637793	0.941266	1.14701		1514480	576027	1063160	841765	624828	1325940	1137960	1433360
1555	O43615	TIMM44	Mitochondrial import inner membrane translocase subunit TIM44	5	5	5	5	51356	11.95	124.604	Protein import, sorting and homeostasis > Protein import and sorting > Import motor	N/A	Homo sapiens	Tmito	0.795825	0.989812	1.22187		476226	67540.6	125516	52883.8	29018.7	296446	185152	298780
2608	Q3ZCQ8	TIMM50	Mitochondrial import inner membrane translocase subunit TIM50	1	1	1	1	39646	2.83	43.7814	Protein import, sorting and homeostasis > Protein import and sorting > TIM23 presequence pathway	N/A	Homo sapiens	Tmito	0.319778	0.908476	16.1035		41548.7	7582.5	45209.5	0	20221.1	44161.7	30729.2	34903.9
2672	Q9H061	TMEM126A	Transmembrane protein 126A	1	1	1	1	21527	13.85	57.0215	OXPHOS > Complex I > CI assembly factors | OXPHOS > OXPHOS assembly factors	N/A	Homo sapiens	Tmito	0.555217	0.916254	8.50575		9203.23	0	0	0	0	0	4908.68	9813.55
2241	Q9P0S9	TMEM14C	Transmembrane protein 14C	1	1	1	1	11565	25.89	88.5392	0	Deamidation (NQ)	Homo sapiens	Tmito	0.482409	0.916254	0.11649		131059	32495	44633.2	17759.9	0	120108	67121.9	77108.9
2071	Q9NS69	TOMM22	Mitochondrial import receptor subunit TOM22 homolog	2	2	2	2	15522	32.39	107.998	Protein import, sorting and homeostasis > Protein import and sorting > TOM	Acetylation (Protein N-term); Deamidation (NQ)	Homo sapiens	Tmito	0.581804	0.916254	3.20148		48339.2	11215.2	7029560	9575400	6447760	71520.4	4100520	2027300
2646	Q15785	TOMM34	Mitochondrial import receptor subunit TOM34	1	1	1	1	34559	4.85	54.8797	Protein import, sorting and homeostasis > Protein import and sorting > TOM	N/A	Homo sapiens	Tmito	0.473153	0.916254	0.0517455		48322.2	0	35693.6	0	0	12365.9	0	0
1523	O96008	TOMM40	Mitochondrial import receptor subunit TOM40 homolog	4	2	4	2	37893	9.42	97.7613	Protein import, sorting and homeostasis > Protein import and sorting > TOM	N/A	Homo sapiens	Tmito	0.508033	0.916254	21.5208		162948	0	0	33597.4	0	110859	50745.1	208748
1492	O94826	TOMM70	Mitochondrial import receptor subunit TOM70	5	5	5	5	67455	9.54	154.765	Protein import, sorting and homeostasis > Protein import and sorting > TOM	Carbamidomethylation; Deamidation (NQ)	Homo sapiens	Tmito	0.397469	0.908476	1.56135		711140	123618	519251	253257	247976	1025640	456781	591376
1602	Q12931	TRAP1	Heat shock protein 75 kDa, mitochondrial	4	4	3	3	80110	4.97	133.879	Protein import, sorting and homeostasis > Protein homeostasis > Chaperones	N/A	Homo sapiens	Tmito	0.300423	0.908476	2.73759		211989	38978.1	80199.3	3885.36	59911.7	159175	86699.4	174908
2879	P43897	TSFM	Elongation factor Ts, mitochondrial	1	1	1	1	35391	5.23	49.788	Mitochondrial central dogma > Translation > Translation factors	N/A	Homo sapiens	Tmito	0.984563	1	0.913407		52247.1	0	80777.7	0	36605.4	0	0	80253.9
1952	P30536	TSPO	Translocator protein	2	2	2	2	18828	18.34	103.876	Metabolism > Lipid metabolism > Cholesterol, bile acid, steroid synthesis	Carbamidomethylation; Oxidation (M)	Homo sapiens	Tmito	0.0574627	0.908476	0.444539		12200000	5938760	12900000	11900000	2168780	6158350	8337600	3900410
511	P49411	TUFM	Elongation factor Tu, mitochondrial	19	19	19	19	49875	50.11	243.282	Mitochondrial central dogma > Translation > Translation factors	Carbamidomethylation; Oxidation (M)	Homo sapiens	Tmito	0.152492	0.908476	1.82913		17800000	7073850	6519520	5912070	11700000	8501150	19300000	28300000
252	Q16881	TXNRD1	Thioredoxin reductase 1, cytoplasmic	21	21	21	21	70875	44.53	303.939	Metabolism > Detoxification > ROS and glutathione metabolism | Metabolism > Detoxification > Selenoproteins	Carbamidomethylation; Deamidation (NQ); Oxidation (M)	Homo sapiens	Tmito	0.948721	1	1.02754		17000000	3085460	8038500	5718710	4053750	8274360	9527680	8411260
2198	Q9UDW1	UQCR10	Cytochrome b-c1 complex subunit 9	1	1	1	1	7308	26.98	47.966	OXPHOS > Complex III > CIII subunits | OXPHOS > OXPHOS subunits	N/A	Homo sapiens	Tmito	0.197639	0.908476	136.103		69179.6	0	190839	0	80465.4	56625.1	14774.9	67292.9
2749	P14927	UQCRB	Cytochrome b-c1 complex subunit 7	1	1	1	1	13530	11.71	66.1043	OXPHOS > Complex III > CIII subunits | OXPHOS > OXPHOS subunits	N/A	Homo sapiens	Tmito	0.21698	0.908476	99.0332		70159	0	115189	0	32076.5	48020	7239.97	69706.5
458	P31930	UQCRC1	Cytochrome b-c1 complex subunit 1, mitochondrial	15	15	14	14	52646	46.04	284.545	Protein import, sorting and homeostasis > Protein import and sorting > Preprotein cleavage | OXPHOS > Complex III > CIII subunits | OXPHOS > OXPHOS subunits	Carbamidomethylation; Deamidation (NQ); Oxidation (M)	Homo sapiens	Tmito	0.279595	0.908476	1.78067		6590630	2659700	7226000	1086070	4510910	10500000	6275160	4653450
451	P22695	UQCRC2	Cytochrome b-c1 complex subunit 2, mitochondrial	13	13	13	13	48443	47.02	244.885	Protein import, sorting and homeostasis > Protein import and sorting > Preprotein cleavage | OXPHOS > Complex III > CIII subunits | OXPHOS > OXPHOS subunits	Carbamidomethylation; Deamidation (NQ)	Homo sapiens	Tmito	0.926107	1	0.958649		9373140	4742940	12300000	1748880	5306450	5572940	5764130	4738220
1286	P47985	UQCRFS1	Cytochrome b-c1 complex subunit Rieske, mitochondrial	6	6	2	2	29668	8.03	150.79	OXPHOS > Complex III > CIII subunits | Metabolism > Metals and cofactors > Fe-S-containing proteins | OXPHOS > OXPHOS subunits	N/A	Homo sapiens	Tmito	0.346471	0.908476	24.9797		500382	117156	366651	0	269827	394735	286322	274425
2376	O14949	UQCRQ	Cytochrome b-c1 complex subunit 8	2	2	2	2	9906	29.27	87.0574	OXPHOS > Complex III > CIII subunits | OXPHOS > OXPHOS subunits	N/A	Homo sapiens	Tmito	0.822442	1	1.18072		132643	60387.1	142033	9563.17	66978.5	102441	27004	114124
316	P21796	VDAC1	Voltage-dependent anion-selective channel protein 1	23	22	22	22	30773	87.63	311.156	Signaling > Calcium homeostasis > Mitochondrial permeability transition pore | Mitochondrial dynamics and surveillance > Organelle contact sites | Small molecule transport	Acetylation (Protein N-term); Carbamidomethylation; Oxidation (M)	Homo sapiens	Tmito	0.754815	0.970275	1.12389		35800000	10900000	35200000	10500000	17600000	25800000	20600000	24600000
625	P45880	VDAC2	Voltage-dependent anion-selective channel protein 2	14	14	14	14	31566	56.46	241.416	Small molecule transport	Carbamidomethylation	Homo sapiens	Tmito	0.98228	1	1.00794		26800000	7722890	20100000	7730820	10600000	17200000	11900000	15300000
1299	Q9Y277	VDAC3	Voltage-dependent anion-selective channel protein 3	7	7	6	6	30659	23.32	159.317	Signaling > Calcium homeostasis > Mitochondrial permeability transition pore | Small molecule transport	Acetylation (Protein N-term); Carbamidomethylation	Homo sapiens	Tmito	0.683581	0.941266	1.21299		3465150	659332	1330750	543368	849506	1745490	1423620	1694220
