# Supplementary material for: Large extracellular vesicles containing mitochondria (EVMs) derived from Alzheimer’s disease cells harbor pathologic functional and molecular profiles and spread mitochondrial dysfunctions
Source: Research Square preprint supplement (doi:10.21203/rs.3.rs-5932075/v1), 2025-02-13
Supplement: Supplementary file 4 [file ab1f6a80e17bab0aaff0957a.xlsx]

## Sheet: Volcano Plot
Up-regulated	Down-regulated																			EVMs APPswe				EVMS CTRL
Accession	#Peptides DB	#Peptides LFQ	#Unique DB	#Unique LFQ	-10LgP	Avg. Mass	Coverage (%)	Description	Gene	MitoCarta3.0_MitoPathways	MitoCarta3.0_SubMitoLocalization	PTM	Protein Group	Taxonomia	TrainingDataset	p-value	q-value	Fold change	Log2(FC)	EVMs_SH_APPswe_1 Area	EVMs_SH_APPswe_3 Area	EVMs_SH_APPswe_2 Area	EVMs_SH_APPswe_4 Area	EVMs_SH_CTRL_1 Area	EVMs_SH_CTRL_2 Area	EVMs_SH_CTRL_3 Area	EVMs_SH_CTRL_4 Area
Q96AE7	3	3	3	3	179.248	129558	3.94	Tetratricopeptide repeat protein 17	TTC17	#N/A	#N/A	N/A	3839	Homo sapiens	#N/A	1.455e-14	7.55288e-11	95561.9	16.5441	92587.8	101571	98645.2	89896.3	0	0	0	0
Q96NE9	4	4	4	4	218.558	72044	9	FERM domain-containing protein 6	FRMD6	#N/A	#N/A	N/A	3121	Homo sapiens	#N/A	1.17139e-06	0.000160018	72289.3	16.1415	40246.7	173373	19191.2	203932	0	0	0	0
Q6P4E1	4	3	4	3	210.351	49498	9.17	Protein GOLM2	GOLM2	#N/A	#N/A	N/A	3239	Homo sapiens	#N/A	0.00685152	0.0446906	13711.5	13.7431	162427	181648	92972.3	160073	0	12422.7	0	0
P56730	52	52	52	52	528.589	97067	64.8	Neurotrypsin	PRSS12	#N/A	#N/A	Carbamidomethylation; Deamidation (NQ); Oxidation (M)	102	Homo sapiens	#N/A	1.60488e-09	8.39071e-07	46.2752	5.53217	225000000	262000000	215000000	230000000	4813760	4823320	5817150	4706670
P05067	38	37	35	34	493.374	86943	48.7	Amyloid-beta precursor protein	APP	#N/A	#N/A	Carbamidomethylation; Deamidation (NQ); Oxidation (M)	126	Homo sapiens	#N/A	1.62852e-05	0.00136349	29.4357	4.8795	470000000	417000000	379000000	305000000	16100000	23200000	11600000	6964680
Q6ZRI8	27	27	27	27	450.053	61664	59.96	Rho GTPase-activating protein 36	ARHGAP36	#N/A	#N/A	Carbamidomethylation; Deamidation (NQ); Oxidation (M)	407	Homo sapiens	#N/A	5.39253e-06	0.000608535	18.9309	4.24267	50200000	59000000	50700000	43000000	2249940	1718110	3472730	3745040
P16402	19	18	4	4	400.777	22350	19.91	Histone H1.3	H1-3	#N/A	#N/A	Acetylation (Protein N-term)	815	Homo sapiens	#N/A	3.03237e-05	0.0022171	15.116	3.91801	4229700	6957520	2634870	4479830	302689	408248	253406	212468
Q14432	7	7	7	7	268.468	124979	7.45	cGMP-inhibited 3',5'-cyclic phosphodiesterase 3A	PDE3A	#N/A	#N/A	N/A	2442	Homo sapiens	#N/A	2.13607e-05	0.0017059	14.8479	3.89219	1265280	1388820	777852	998940	83510.4	61235.2	113670	48330.5
Q96MW5	9	9	9	9	318.603	68424	18.3	Conserved oligomeric Golgi complex subunit 8	COG8	#N/A	#N/A	Carbamidomethylation	2040	Homo sapiens	#N/A	0.00692012	0.0448282	14.3976	3.84776	434176	1330120	388414	881079	39754	14781	31964.6	244876
Q6UXH1	6	6	6	6	262.237	38192	24.36	Protein disulfide isomerase CRELD2	CRELD2	#N/A	#N/A	Carbamidomethylation	2822	Homo sapiens	#N/A	9.66764e-05	0.0048723	13.9548	3.80269	2330770	1564210	1247810	1443120	53591.1	147003	137202	160167
O94907	13	13	11	11	370.353	28672	52.63	Dickkopf-related protein 1	DKK1	#N/A	#N/A	Carbamidomethylation; Deamidation (NQ); Oxidation (M)	794	Homo sapiens	#N/A	0.0010968	0.0165029	12.6574	3.66191	73400000	26200000	60000000	17800000	1483370	2532860	4396830	4843900
Q92604	6	6	6	6	252.607	43089	20	Acyl-CoA:lysophosphatidylglycerol acyltransferase 1	LPGAT1	#N/A	#N/A	N/A	2685	Homo sapiens	#N/A	0.00852828	0.0510201	11.5543	3.53036	193854	242940	160880	364198	4829.47	40968.1	11019.1	71014.2
Q6UXK2	5	5	5	5	227.533	78990	11.54	Immunoglobulin superfamily containing leucine-rich repeat protein 2	ISLR2	#N/A	#N/A	Carbamidomethylation	2876	Homo sapiens	#N/A	3.13442e-06	0.0003874	11.0054	3.46014	584937	600524	447322	424273	40867.8	55581.8	35567.1	56249.8
Q9HAN9	6	5	6	5	264.485	31932	25.45	Nicotinamide/nicotinic acid mononucleotide adenylyltransferase 1	NMNAT1	#N/A	#N/A	Carbamidomethylation	2810	Homo sapiens	#N/A	0.000125322	0.00573098	10.2407	3.35624	225479	459397	193323	394483	18125.6	38453.9	31418.9	32799.3
P48307	9	9	9	9	330.647	26934	42.55	Tissue factor pathway inhibitor 2	TFPI2	#N/A	#N/A	Carbamidomethylation; Oxidation (M)	1553	Homo sapiens	#N/A	0.00161701	0.0205391	10.0448	3.32838	4898150	13500000	5234900	14700000	1953190	455442	762362	737029
Q9H9F9	3	3	3	3	189.603	68297	6.26	Actin-related protein 5	ACTR5	#N/A	#N/A	Acetylation (Protein N-term)	3826	Homo sapiens	#N/A	0.00148129	0.0197072	9.87755	3.30415	116442	147440	70637.1	121542	5537.37	6178.92	17117.3	26438.4
Q8NFH5	4	4	4	4	225.071	34774	19.94	Nucleoporin NUP35	NUP35	#N/A	#N/A	Carbamidomethylation	3251	Homo sapiens	#N/A	0.00630032	0.0432404	9.80856	3.29404	470394	169673	151547	107974	57173.9	20163.9	20000.5	6119.38
Q96EB6	3	3	3	3	211.777	81681	6.56	NAD-dependent protein deacetylase sirtuin-1	SIRT1	#N/A	#N/A	N/A	3871	Homo sapiens	#N/A	0.00125037	0.017839	9.74529	3.2847	267081	441482	216721	385827	34427.5	33356.2	12694.4	74985.5
O43159	6	6	6	6	270.849	50715	18.2	Ribosomal RNA-processing protein 8	RRP8	#N/A	#N/A	Carbamidomethylation	2619	Homo sapiens	#N/A	0.00138428	0.0189599	9.17319	3.19742	343753	835879	411061	640337	41997.8	50676.2	32811.6	152955
O60613	3	3	3	3	201.65	18061	24.85	Selenoprotein F	SELENOF	#N/A	#N/A	Carbamidomethylation	3640	Homo sapiens	#N/A	0.000462568	0.0112205	8.69531	3.12024	406308	274783	311799	268571	19434.3	63363	23630.2	56204
Q96ET8	3	3	3	3	177.381	31105	16.3	Golgi apparatus membrane protein TVP23 homolog C	TVP23C	#N/A	#N/A	Acetylation (Protein N-term); Oxidation (M)	3497	Homo sapiens	#N/A	0.00761742	0.0474694	8.64016	3.11106	308809	732071	90728.1	429292	57280.6	64916.4	17453	24345.6
P07355	33	33	33	33	474.978	38604	75.52	Annexin A2	ANXA2	#N/A	#N/A	Acetylation (Protein N-term); Carbamidomethylation; Deamidation (NQ); Oxidation (M)	222	Homo sapiens	#N/A	0.00177529	0.0212178	8.58643	3.10206	117000000	170000000	76600000	105000000	37200000	7682880	7921230	13000000
O95983	3	3	3	3	198.541	32844	13.4	Methyl-CpG-binding domain protein 3	MBD3	#N/A	#N/A	Carbamidomethylation	3531	Homo sapiens	#N/A	0.000161804	0.00671939	8.00832	3.0015	123427	177019	61258.3	96025.2	9697.82	16333	13511.4	14600.8
Q9C040	4	4	3	3	231.644	81530	7.93	Tripartite motif-containing protein 2	TRIM2	#N/A	#N/A	N/A	3144	Homo sapiens	#N/A	0.0024037	0.02473	7.83223	2.96942	82930.2	217309	59766.3	153915	20634.8	22186.4	6336.91	15185.2
Q9NWU2	4	4	4	4	240.56	26749	25.88	Glucose-induced degradation protein 8 homolog	GID8	#N/A	#N/A	N/A	3374	Homo sapiens	#N/A	0.00197067	0.022287	7.25702	2.85938	832686	1039550	628796	1085540	319051	122879	93073.2	58382.6
P26885	6	6	6	6	275.408	15649	53.52	Peptidyl-prolyl cis-trans isomerase FKBP2	FKBP2	#N/A	#N/A	Carbamidomethylation; Oxidation (M)	2377	Homo sapiens	#N/A	0.00496425	0.0375434	7.24242	2.85647	3619770	2461890	2899650	2554800	189937	286070	1462530	301944
Q13546	3	3	3	3	149.67	75931	6.41	Receptor-interacting serine/threonine-protein kinase 1	RIPK1	#N/A	#N/A	N/A	3822	Homo sapiens	#N/A	0.00209939	0.022704	7.20994	2.84999	1050950	1730960	604297	1723390	83768.2	122732	226278	301369
O43852	25	25	25	25	449.211	37107	63.81	Calumenin	CALU	#N/A	#N/A	Deamidation (NQ); Oxidation (M)	367	Homo sapiens	#N/A	0.000609607	0.0123491	7.01993	2.81146	93100000	57000000	42000000	48200000	12500000	11700000	4505120	6714130
Q15050	4	4	4	4	235.734	41193	15.07	Ribosome biogenesis regulatory protein homolog	RRS1	#N/A	#N/A	N/A	3116	Homo sapiens	#N/A	0.00297213	0.0273552	6.97042	2.80125	805280	394198	645563	314572	31596.2	103507	148292	56307.4
O60476	3	3	3	3	183.258	73004	7.8	Mannosyl-oligosaccharide 1,2-alpha-mannosidase IB	MAN1A2	#N/A	#N/A	N/A	3751	Homo sapiens	#N/A	0.00648498	0.0439472	6.95559	2.79817	110381	214837	98888	170550	14091.4	64067.2	8133.34	23270.4
Q9BW19	8	8	8	8	294.827	73748	17.83	Kinesin-like protein KIFC1	KIFC1	#N/A	#N/A	Carbamidomethylation	2285	Homo sapiens	#N/A	0.000989375	0.0159005	6.92621	2.79207	999504	695753	533392	609037	46948.6	137621	179233	84765.6
O76024	3	3	3	3	180.832	100291	2.58	Wolframin	WFS1	#N/A	#N/A	N/A	3724	Homo sapiens	#N/A	0.000405205	0.0104454	6.77679	2.7606	204713	341097	154820	382798	25570.2	35840.4	37064.3	57764.5
P00533	30	30	30	30	456.634	134277	29.34	Epidermal growth factor receptor	EGFR	#N/A	#N/A	Carbamidomethylation; Deamidation (NQ); Oxidation (M)	398	Homo sapiens	#N/A	0.000198946	0.00739992	6.70379	2.74498	11100000	12900000	9913900	8277290	1792160	2500140	1469400	883658
P83881	11	10	3	3	336.6	12441	10.38	60S ribosomal protein L36a	RPL36A	#N/A	#N/A	N/A	1721	Homo sapiens	#N/A	0.00275685	0.0265015	6.6314	2.72931	810700	1523470	900598	1550800	435781	94685.2	108848	198604
Q7Z3J2	9	8	9	8	308.531	109563	9.87	VPS35 endosomal protein-sorting factor-like	VPS35L	#N/A	#N/A	Carbamidomethylation	1973	Homo sapiens	#N/A	0.00237034	0.0246582	6.57698	2.71742	1760470	806293	1340490	1528200	270406	315948	73943	245998
P11177	12	12	12	12	348.234	39233	43.73	Pyruvate dehydrogenase E1 component subunit beta, mitochondrial	PDHB	Metabolism > Carbohydrate metabolism > Pyruvate metabolism	Matrix	Carbamidomethylation; Deamidation (NQ); Oxidation (M)	1067	Homo sapiens	Tmito	9.46246e-06	0.000893084	6.55472	2.71253	7828500	6177230	5307270	4903210	922903	950710	708676	1096370
Q9Y3E1	6	6	4	4	256.206	22620	31.53	Hepatoma-derived growth factor-related protein 3	HDGFL3	#N/A	#N/A	N/A	2711	Homo sapiens	#N/A	0.00358189	0.0307841	6.3666	2.67052	122656	517868	194974	501567	47449.1	38445.2	29740.5	69688.8
Q9Y3A4	4	4	4	4	223.264	32334	25.36	Ribosomal RNA-processing protein 7 homolog A	RRP7A	#N/A	#N/A	Carbamidomethylation	3413	Homo sapiens	#N/A	0.000689592	0.0131747	6.1848	2.62873	520722	389860	248872	284110	33967.9	99684	45239.6	64041.5
O75446	3	3	3	3	174.249	23306	17.73	Histone deacetylase complex subunit SAP30	SAP30	#N/A	#N/A	Carbamidomethylation	3597	Homo sapiens	#N/A	0.00693656	0.0448414	6.16599	2.62433	219552	394228	181668	240630	12420.8	39000.1	80667.8	66986.4
Q8N6C5	7	7	7	7	283.036	148936	7.26	Immunoglobulin superfamily member 1	IGSF1	#N/A	#N/A	N/A	2494	Homo sapiens	#N/A	0.000122662	0.00573098	6.10745	2.61057	738279	1272300	905301	829111	128352	107093	236787	155689
Q9Y2B0	11	11	11	11	350.037	20652	64.29	Protein canopy homolog 2	CNPY2	#N/A	#N/A	Carbamidomethylation; Deamidation (NQ)	1601	Homo sapiens	#N/A	5.52794e-06	0.000610543	6.03743	2.59394	5500400	5736850	5609600	5222980	740600	1072640	751273	1165940
Q9H336	25	25	25	25	438.828	56888	64.8	Cysteine-rich secretory protein LCCL domain-containing 1	CRISPLD1	#N/A	#N/A	Carbamidomethylation; Deamidation (NQ); Oxidation (M)	451	Homo sapiens	#N/A	0.0010007	0.0159541	6.03535	2.59344	17100000	9532890	17100000	10400000	1427560	1999760	1681170	4552530
P55145	18	18	18	18	394.67	20700	58.79	Mesencephalic astrocyte-derived neurotrophic factor	MANF	#N/A	#N/A	Carbamidomethylation; Oxidation (M)	975	Homo sapiens	#N/A	0.000186694	0.00739793	6.03324	2.59293	30200000	22400000	23000000	19600000	2402360	6338600	3536660	4273780
Q9HC07	6	6	6	6	265.736	34906	25.31	Transmembrane protein 165	TMEM165	#N/A	#N/A	Oxidation (M)	2816	Homo sapiens	#N/A	0.000751434	0.0137834	6.00027	2.58503	2790960	3521150	1918930	3496640	518247	824183	248683	478916
Q13501	7	6	7	6	287.216	47687	22.05	Sequestosome-1	SQSTM1	#N/A	#N/A	Carbamidomethylation	2473	Homo sapiens	#N/A	0.000544829	0.0115437	5.97162	2.57812	738187	1548540	572654	1067740	99520.4	208473	155803	170038
P08559	18	18	18	18	399.888	43296	43.08	Pyruvate dehydrogenase E1 component subunit alpha, somatic form, mitochondrial	PDHA1	Metabolism > Carbohydrate metabolism > Pyruvate metabolism	Matrix	Carbamidomethylation; Deamidation (NQ); Oxidation (M)	950	Homo sapiens	Tmito	3.51114e-05	0.00246231	5.96005	2.57533	10300000	9798550	7134550	12400000	1272170	1830620	2125800	1429280
P53384	3	3	3	3	194.593	34534	9.06	Cytosolic Fe-S cluster assembly factor NUBP1	NUBP1	#N/A	#N/A	Carbamidomethylation	3856	Homo sapiens	#N/A	0.000381137	0.0101461	5.95882	2.57503	705333	622417	401581	450548	63963	107337	61785.2	148522
P09382	9	9	9	9	325.385	14716	71.85	Galectin-1	LGALS1	#N/A	#N/A	Acetylation (Protein N-term); Carbamidomethylation; Deamidation (NQ); Oxidation (M)	1698	Homo sapiens	#N/A	2.43606e-05	0.00185964	5.89264	2.55891	25900000	20100000	18800000	15300000	3033160	3717190	2605780	4227250
O14813	8	8	4	4	310.872	29653	25.35	Paired mesoderm homeobox protein 2A	PHOX2A	#N/A	#N/A	N/A	2264	Homo sapiens	#N/A	0.000590183	0.0121641	5.80731	2.53787	3078190	2718760	1658930	2040220	220593	464590	371714	653734
Q14195	32	31	25	24	468.332	61963	58.6	Dihydropyrimidinase-related protein 3	DPYSL3	#N/A	#N/A	Carbamidomethylation; Deamidation (NQ); Oxidation (M)	248	Homo sapiens	#N/A	0.00147057	0.0197072	5.69258	2.50908	52400000	39200000	29000000	29800000	10500000	7220310	7830450	2847490
A6NKG5	57	56	57	56	534.171	155048	47.05	Retrotransposon-like protein 1	RTL1	#N/A	#N/A	Carbamidomethylation; Deamidation (NQ); Oxidation (M)	65	Homo sapiens	#N/A	9.31286e-06	0.000893084	5.67393	2.50435	99300000	104000000	85700000	94200000	12900000	21000000	14700000	20200000
Q6NYC1	10	10	10	10	326.546	46462	33.25	Bifunctional arginine demethylase and lysyl-hydroxylase JMJD6	JMJD6	#N/A	#N/A	Carbamidomethylation	1815	Homo sapiens	#N/A	0.000741911	0.0136969	5.54054	2.47003	2207410	2756100	1486500	2771380	343715	626722	228537	540257
Q12830	7	4	7	4	239.718	338262	1.74	Nucleosome-remodeling factor subunit BPTF	BPTF	#N/A	#N/A	N/A	2481	Homo sapiens	#N/A	0.00867425	0.0517408	5.51149	2.46244	146628	300329	96896.5	219632	10836.9	40039.3	38822.2	60293.8
Q68CZ6	4	4	4	4	213.579	69650	8.79	HAUS augmin-like complex subunit 3	HAUS3	#N/A	#N/A	N/A	3321	Homo sapiens	#N/A	0.00258789	0.0255881	5.45871	2.44856	99707.1	255141	69121.7	181563	29234.9	25447.5	32884.3	14697.8
Q8TDP1	3	3	3	3	205.795	17840	27.44	Ribonuclease H2 subunit C	RNASEH2C	#N/A	#N/A	Carbamidomethylation	3667	Homo sapiens	#N/A	0.00544279	0.0394602	5.43653	2.44269	462191	319708	239452	224512	20135.8	51443.9	99268.1	88436.8
Q16563	3	3	3	3	211.781	28565	19.69	Synaptophysin-like protein 1	SYPL1	#N/A	#N/A	Carbamidomethylation	3783	Homo sapiens	#N/A	0.000828531	0.0146289	5.35901	2.42197	5503590	8359860	3761700	12200000	1628210	1186970	1037380	1276920
Q9BT40	3	3	3	3	199.279	51090	8.48	Inositol polyphosphate 5-phosphatase K	INPP5K	#N/A	#N/A	N/A	3824	Homo sapiens	#N/A	0.00171334	0.0210757	5.31301	2.40953	241278	362342	207325	463660	40718.2	49286.5	43917	119668
P09172	29	29	29	29	463.16	69065	65.48	Dopamine beta-hydroxylase	DBH	#N/A	#N/A	Carbamidomethylation; Deamidation (NQ); Oxidation (M)	151	Homo sapiens	#N/A	6.28865e-05	0.0035483	5.26528	2.39651	242000000	221000000	189000000	181000000	49000000	50500000	26000000	37000000
Q8IUR7	6	6	6	6	257.474	75509	12.63	Armadillo repeat-containing protein 8	ARMC8	#N/A	#N/A	Carbamidomethylation	2815	Homo sapiens	#N/A	0.000711518	0.0134309	5.24924	2.39211	446209	666659	243420	521298	99211.2	114416	58820.4	74460.3
P15289	4	4	4	4	229.958	53588	12.43	Arylsulfatase A	ARSA	#N/A	#N/A	Carbamidomethylation	3280	Homo sapiens	#N/A	0.000826888	0.0146289	5.20444	2.37974	411824	481841	325144	355028	85498.7	90101.5	113143	35821.2
Q96HE7	29	29	28	28	460.136	54393	65.6	ERO1-like protein alpha	ERO1A	#N/A	#N/A	Carbamidomethylation; Deamidation (NQ); Oxidation (M)	359	Homo sapiens	#N/A	2.31773e-05	0.00182293	5.18015	2.37299	42700000	39200000	32700000	34600000	7307610	9509560	7371440	5134290
Q10471	29	29	29	29	456.694	64733	48.34	Polypeptide N-acetylgalactosaminyltransferase 2	GALNT2	#N/A	#N/A	Carbamidomethylation; Deamidation (NQ); Oxidation (M)	388	Homo sapiens	#N/A	0.00068848	0.0131747	5.15096	2.36484	8940510	17400000	6236620	12800000	1489580	2522440	2520800	1862480
Q8IY37	4	3	4	3	191.258	129545	2.94	Probable ATP-dependent RNA helicase DHX37	DHX37	#N/A	#N/A	Carbamidomethylation	3241	Homo sapiens	#N/A	0.000203302	0.00748467	5.11375	2.35438	794120	670882	550358	558986	82544.3	114590	125515	201879
P18074	5	4	5	4	233.648	86909	7.76	General transcription and DNA repair factor IIH helicase subunit XPD	ERCC2	#N/A	#N/A	Carbamidomethylation	2891	Homo sapiens	#N/A	0.0053497	0.0390292	5.07601	2.3437	193808	257455	154933	368229	22811.9	52012	33558.6	107690
P04792	22	22	22	22	423.064	22783	92.68	Heat shock protein beta-1	HSPB1	#N/A	#N/A	Deamidation (NQ); Oxidation (M)	464	Homo sapiens	#N/A	0.000397062	0.0104454	5.04484	2.33481	128000000	134000000	85600000	102000000	36800000	16600000	15200000	24900000
Q6ZRP7	23	23	23	23	420.804	77529	37.97	Sulfhydryl oxidase 2	QSOX2	#N/A	#N/A	Carbamidomethylation	704	Homo sapiens	#N/A	7.54226e-05	0.00409272	5.0242	2.3289	5483800	8497020	4585330	6470710	910493	1454850	1399160	1170690
Q14004	7	6	3	3	287.139	164923	2.98	Cyclin-dependent kinase 13	CDK13	#N/A	#N/A	N/A	2435	Homo sapiens	#N/A	0.00477628	0.0370865	4.89772	2.29211	293541	459066	248466	378319	40552.2	80001.5	40523.3	167447
Q15084	33	33	33	33	472.116	48121	61.14	Protein disulfide-isomerase A6	PDIA6	#N/A	#N/A	Carbamidomethylation; Deamidation (NQ)	244	Homo sapiens	#N/A	8.29278e-05	0.00434143	4.89117	2.29018	409000000	261000000	279000000	231000000	60500000	79600000	54500000	45800000
Q6Y288	8	8	8	8	305.897	56564	19.68	Beta-1,3-glucosyltransferase	B3GLCT	#N/A	#N/A	Deamidation (NQ)	2071	Homo sapiens	#N/A	0.00235645	0.0246124	4.87383	2.28505	2043990	1670570	1450370	2479750	626318	545943	170821	372623
P11021	51	51	48	48	527.273	72333	61.16	Endoplasmic reticulum chaperone BiP	HSPA5	#N/A	#N/A	Carbamidomethylation; Deamidation (NQ); Oxidation (M)	45	Homo sapiens	#N/A	0.000126715	0.00573098	4.77423	2.25527	897000000	553000000	589000000	465000000	127000000	175000000	111000000	106000000
P30419	9	9	5	5	317.838	56806	15.12	Glycylpeptide N-tetradecanoyltransferase 1	NMT1	#N/A	#N/A	N/A	1834	Homo sapiens	#N/A	0.004918	0.0374457	4.71443	2.23708	1203680	2394840	3354780	3500790	351284	446954	397488	1098130
Q14257	17	17	17	17	402.1	36876	51.1	Reticulocalbin-2	RCN2	#N/A	#N/A	Deamidation (NQ); Oxidation (M)	806	Homo sapiens	#N/A	0.00105068	0.0161938	4.67421	2.22472	25300000	11800000	14000000	10600000	4307940	3955570	2031850	2680600
Q8TED0	9	9	9	9	275.477	58415	20.46	U3 small nucleolar RNA-associated protein 15 homolog	UTP15	#N/A	#N/A	Acetylation (Protein N-term); Carbamidomethylation	2061	Homo sapiens	#N/A	0.00531718	0.0390044	4.664	2.22157	478241	935217	461373	1470050	113505	147951	123287	309642
Q9Y3E0	3	3	3	3	215.567	15426	18.84	Vesicle transport protein GOT1B	GOLT1B	#N/A	#N/A	N/A	3816	Homo sapiens	#N/A	0.00243542	0.0249355	4.62008	2.20792	220964	609162	362939	793130	70244.9	115982	93470.2	111675
Q92786	4	4	4	4	199.224	83203	6.92	Prospero homeobox protein 1	PROX1	#N/A	#N/A	N/A	3415	Homo sapiens	#N/A	0.00184964	0.0214318	4.59162	2.199	402682	205625	216601	137546	36745.2	64875.2	34005.4	68462.8
Q9HCN8	7	7	7	7	274.451	23598	42.08	Stromal cell-derived factor 2-like protein 1	SDF2L1	#N/A	#N/A	Carbamidomethylation; Deamidation (NQ)	2240	Homo sapiens	#N/A	0.000369449	0.00988561	4.54788	2.18519	2185200	1572100	1775300	1312890	236731	468662	524656	321547
Q9H3G5	7	7	7	7	292.678	54164	17.65	Probable serine carboxypeptidase CPVL	CPVL	#N/A	#N/A	N/A	2426	Homo sapiens	#N/A	2.42117e-05	0.00185964	4.52523	2.17799	4388740	3913550	3369410	3027290	944319	720407	960035	639693
Q9Y2R4	9	6	8	5	314.783	67466	12.19	Probable ATP-dependent RNA helicase DDX52	DDX52	#N/A	#N/A	Carbamidomethylation	1974	Homo sapiens	#N/A	0.00106249	0.0162063	4.51452	2.17457	355192	439509	234058	586144	88366	76200.3	58565.1	130747
Q9BT09	9	9	9	9	322.986	30748	34.53	Protein canopy homolog 3	CNPY3	#N/A	#N/A	Carbamidomethylation	2125	Homo sapiens	#N/A	0.000410956	0.0104537	4.48639	2.16555	4619680	3154770	2999210	2807870	953128	1035610	472225	649953
Q495W5	4	4	4	4	208.05	55816	10.77	Alpha-(1,3)-fucosyltransferase 11	FUT11	#N/A	#N/A	N/A	3134	Homo sapiens	#N/A	0.00993837	0.0555221	4.48487	2.16507	335919	261164	204716	265172	42321	173255	27788.8	57771.7
Q9BRC7	8	8	8	8	304.361	87585	14.57	1-phosphatidylinositol 4,5-bisphosphate phosphodiesterase delta-4	PLCD4	#N/A	#N/A	Carbamidomethylation	2306	Homo sapiens	#N/A	0.00141718	0.0192078	4.48429	2.16488	660525	1270600	533059	1279920	133022	270972	210341	186770
Q9NPF5	4	4	4	4	187.324	52993	10.49	DNA methyltransferase 1-associated protein 1	DMAP1	#N/A	#N/A	N/A	3372	Homo sapiens	#N/A	0.000937175	0.0158306	4.46086	2.15732	461269	770408	298284	582294	78189.5	131974	100563	150210
P27797	30	30	30	30	467.655	48142	75.06	Calreticulin	CALR	#N/A	#N/A	Carbamidomethylation; Deamidation (NQ); Oxidation (M)	227	Homo sapiens	#N/A	0.000264935	0.00823519	4.45285	2.15473	450000000	282000000	309000000	232000000	75000000	99100000	56400000	55200000
P30040	14	14	14	14	375.006	28993	59.39	Endoplasmic reticulum resident protein 29	ERP29	#N/A	#N/A	Carbamidomethylation; Deamidation (NQ); Oxidation (M)	1089	Homo sapiens	#N/A	1.84593e-05	0.00149722	4.43027	2.1474	53100000	36900000	39400000	31900000	8031840	10200000	8183680	9535060
Q5H8A4	4	4	4	4	206.246	108173	5.6	GPI ethanolamine phosphate transferase 2	PIGG	#N/A	#N/A	N/A	3119	Homo sapiens	#N/A	0.00273061	0.0263468	4.39167	2.13477	464276	461106	343493	446840	120241	149914	40726.5	120326
Q9UBB9	3	3	3	3	186.677	96820	5.85	Tuftelin-interacting protein 11	TFIP11	#N/A	#N/A	Carbamidomethylation	3853	Homo sapiens	#N/A	0.00468386	0.0366371	4.38863	2.13377	132893	334545	147484	256347	22010.5	69896	50280.5	58577.7
O94766	10	10	10	10	335.937	37122	40	Galactosylgalactosylxylosylprotein 3-beta-glucuronosyltransferase 3	B3GAT3	#N/A	#N/A	Deamidation (NQ)	1592	Homo sapiens	#N/A	0.000565845	0.0117964	4.36973	2.12754	8743110	9879170	5498600	8034500	1370700	3022820	1786090	1414230
Q92522	11	11	11	11	351.591	22487	45.54	Histone H1.10	H1-10	#N/A	#N/A	Acetylation (Protein N-term); Deamidation (NQ); Oxidation (M)	1500	Homo sapiens	#N/A	0.00338325	0.0296805	4.36653	2.12649	9419250	22200000	5417710	16200000	2299910	2702600	2766440	2935910
O14735	3	3	3	3	199.173	23539	15.96	CDP-diacylglycerol--inositol 3-phosphatidyltransferase	CDIPT	#N/A	#N/A	Oxidation (M)	3147	Homo sapiens	#N/A	0.00107815	0.0163646	4.36339	2.12545	747577	512862	371328	672936	109259	228469	108382	97689.5
Q9UHB6	6	6	6	6	225.951	85226	10.01	LIM domain and actin-binding protein 1	LIMA1	#N/A	#N/A	Carbamidomethylation	2771	Homo sapiens	#N/A	0.00179704	0.0212492	4.36028	2.12442	695960	328291	415050	230023	126366	92912.9	60735	84627.3
P07305	6	6	6	6	275.259	20863	27.84	Histone H1.0	H1-0	#N/A	#N/A	Acetylation (Protein N-term); Deamidation (NQ); Oxidation (M)	1765	Homo sapiens	#N/A	0.000670919	0.0131424	4.34761	2.12022	20400000	30000000	12200000	22700000	4304470	6382230	5022500	3438130
Q9BRK5	8	8	8	8	298.488	41807	20.99	45 kDa calcium-binding protein	SDF4	#N/A	#N/A	N/A	2289	Homo sapiens	#N/A	0.000209359	0.00750615	4.31692	2.11	4350610	3216460	2669140	2396820	724943	1020570	598650	581996
Q6NTF9	3	3	3	3	196.168	39202	9.07	Rhomboid domain-containing protein 2	RHBDD2	#N/A	#N/A	N/A	3844	Homo sapiens	#N/A	0.00770277	0.0478212	4.30226	2.10509	576747	896061	444293	1027690	234873	123451	76428	310807
Q13586	4	3	4	3	221.183	77423	6.28	Stromal interaction molecule 1	STIM1	#N/A	#N/A	Carbamidomethylation	3323	Homo sapiens	#N/A	0.000165097	0.00680172	4.2929	2.10195	653044	592761	519500	530460	167609	184402	90863.9	111842
Q9UNH6	10	10	10	10	331.99	45303	24.29	Sorting nexin-7	SNX7	#N/A	#N/A	Carbamidomethylation	1811	Homo sapiens	#N/A	0.00497589	0.0375434	4.25872	2.09042	2093120	2887840	1487500	2704410	305654	447077	1231710	439199
O75173	17	17	17	17	397.554	90197	29.87	A disintegrin and metalloproteinase with thrombospondin motifs 4	ADAMTS4	#N/A	#N/A	Carbamidomethylation; Deamidation (NQ); Oxidation (M)	927	Homo sapiens	#N/A	0.0010375	0.0160766	4.25523	2.08924	10700000	10200000	12900000	9243890	2235430	4582820	1475540	2625990
Q71UI9	5	5	3	3	261.003	13509	24.22	Histone H2A.V	H2AZ2	#N/A	#N/A	N/A	2482	Homo sapiens	#N/A	0.00506802	0.0379079	4.2275	2.07981	13100000	37600000	9738900	28100000	3860140	4993240	3720430	5885170
Q5VW38	3	3	3	3	210.18	66990	5.33	Protein GPR107	GPR107	#N/A	#N/A	N/A	3541	Homo sapiens	#N/A	0.000651365	0.0129549	4.20916	2.07353	616386	1105350	483010	710324	155077	186921	115922	221620
P78395	3	3	3	3	201.412	57890	8.25	Melanoma antigen preferentially expressed in tumors	PRAME	#N/A	#N/A	Carbamidomethylation	3715	Homo sapiens	#N/A	0.000881334	0.01525	4.20211	2.07111	107004	125197	116651	156107	17884	34164.1	25324.4	50566.2
O15260	8	8	8	8	306.393	30394	32.34	Surfeit locus protein 4	SURF4	#N/A	#N/A	Acetylation (Protein N-term); Carbamidomethylation; Deamidation (NQ); Oxidation (M)	1289	Homo sapiens	#N/A	0.00703588	0.0452055	4.18146	2.06401	3668700	3630500	2787370	4119520	624876	1892510	381862	1107820
Q9UMX5	6	6	6	6	265.068	18856	37.21	Neudesin	NENF	#N/A	#N/A	N/A	2688	Homo sapiens	#N/A	0.00824411	0.0501115	4.15675	2.05545	2549570	1729570	1672740	1657700	1030660	212355	305607	612329
Q7Z2T5	7	7	7	7	283.108	81747	14.87	TRMT1-like protein	TRMT1L	#N/A	#N/A	Carbamidomethylation	2570	Homo sapiens	#N/A	0.0062084	0.043143	4.13891	2.04925	492605	904796	451069	977872	70498	198073	195042	245981
P13667	58	58	58	58	543.986	72932	71.01	Protein disulfide-isomerase A4	PDIA4	#N/A	#N/A	Deamidation (NQ); Oxidation (M)	59	Homo sapiens	#N/A	0.000595286	0.0121659	4.12453	2.04423	323000000	203000000	212000000	176000000	78400000	66400000	40700000	39900000
Q8IYS2	7	7	7	7	294.448	69157	13.56	Uncharacterized protein KIAA2013	KIAA2013	#N/A	#N/A	Carbamidomethylation	2417	Homo sapiens	#N/A	0.000141444	0.00622234	4.11776	2.04186	1884590	2890750	2987100	3156020	544090	762734	824189	522277
Q5JTV8	16	15	15	14	382.207	66248	28.3	Torsin-1A-interacting protein 1	TOR1AIP1	#N/A	#N/A	Carbamidomethylation; Deamidation (NQ); Oxidation (M)	1072	Homo sapiens	#N/A	0.000243324	0.00799914	4.11216	2.0399	11700000	7289520	8507950	6308360	1585520	2738870	2185190	1686990
Q96II8	5	4	5	4	229.106	86083	6.95	DISP complex protein LRCH3	LRCH3	#N/A	#N/A	Carbamidomethylation	2971	Homo sapiens	#N/A	0.00189376	0.0217009	4.11142	2.03964	348515	583968	308531	498972	54465.6	120849	107911	154377
P30101	49	49	49	49	518.21	56782	73.47	Protein disulfide-isomerase A3	PDIA3	#N/A	#N/A	Carbamidomethylation; Deamidation (NQ); Oxidation (M)	101	Homo sapiens	#N/A	0.000285694	0.00857248	4.07983	2.02851	460000000	322000000	309000000	253000000	87800000	113000000	71400000	59000000
Q96DZ1	13	12	13	12	356.194	54858	32.51	Endoplasmic reticulum lectin 1	ERLEC1	#N/A	#N/A	Carbamidomethylation	1431	Homo sapiens	#N/A	0.00019608	0.00739992	4.06846	2.02448	2420400	2229270	1533120	2259730	575360	635804	338670	550705
Q7LGA3	8	8	8	8	302.951	41881	25.84	Heparan sulfate 2-O-sulfotransferase 1	HS2ST1	#N/A	#N/A	Carbamidomethylation	2175	Homo sapiens	#N/A	3.19302e-05	0.00230208	4.05963	2.02135	2572870	3491430	2242860	2487220	570789	692758	808772	576912
Q9Y4L1	66	65	66	65	550.429	111335	60.96	Hypoxia up-regulated protein 1	HYOU1	#N/A	#N/A	Carbamidomethylation; Deamidation (NQ); Oxidation (M)	36	Homo sapiens	#N/A	0.000942334	0.0158306	4.03033	2.0109	287000000	155000000	149000000	121000000	43400000	60400000	35900000	32300000
Q92615	5	4	5	4	221.005	80552	8.4	La-related protein 4B	LARP4B	#N/A	#N/A	Deamidation (NQ)	2780	Homo sapiens	#N/A	0.000491989	0.0113536	4.01307	2.00471	178410	330127	214007	218884	39679.2	56367.3	55575.8	85577.4
Q99470	7	7	7	7	297.757	23026	44.55	Stromal cell-derived factor 2	SDF2	#N/A	#N/A	Oxidation (M)	2226	Homo sapiens	#N/A	8.20479e-05	0.00434143	4.01047	2.00377	3432800	2153290	2863980	1986590	545837	774229	588336	653869
Q9BUF5	23	23	9	9	435.247	49857	30.94	Tubulin beta-6 chain	TUBB6	#N/A	#N/A	Carbamidomethylation; Deamidation (NQ); Oxidation (M)	182	Homo sapiens	#N/A	0.00167751	0.0209094	3.96826	1.98851	9029380	12400000	3901510	7604680	1537160	2161000	2086650	1932700
Q8IVL6	14	13	14	13	356.963	81837	22.96	Prolyl 3-hydroxylase 3	P3H3	#N/A	#N/A	Carbamidomethylation	1364	Homo sapiens	#N/A	0.00301188	0.0275258	3.90255	1.96442	2209130	1289290	1346890	1187500	201803	398477	673123	362842
Q5VSG8	4	4	4	4	223.634	51317	9.85	Glycoprotein endo-alpha-1,2-mannosidase-like protein	MANEAL	#N/A	#N/A	N/A	3132	Homo sapiens	#N/A	0.0040007	0.0333349	3.8978	1.96266	806564	1123200	775023	898502	181813	532923	145012	194517
P08670	45	44	37	36	505.626	53652	64.59	Vimentin	VIM	#N/A	#N/A	Carbamidomethylation; Deamidation (NQ); Oxidation (M)	149	Homo sapiens	#N/A	0.00542151	0.0393609	3.89516	1.96168	64300000	19600000	25100000	15700000	7422890	7962970	5493080	6644690
P07237	46	46	45	45	512.866	57116	78.54	Protein disulfide-isomerase	P4HB	#N/A	#N/A	Carbamidomethylation; Deamidation (NQ); Oxidation (M)	127	Homo sapiens	#N/A	0.00025529	0.00803158	3.8934	1.96103	331000000	225000000	225000000	184000000	61600000	85600000	53800000	47300000
Q9BS26	17	16	16	16	394.578	46971	37.68	Endoplasmic reticulum resident protein 44	ERP44	#N/A	#N/A	Carbamidomethylation; Oxidation (M)	914	Homo sapiens	#N/A	5.15258e-05	0.00314671	3.89256	1.96072	28400000	22400000	22500000	20600000	5614760	7931760	6277450	4593990
O95881	8	7	8	7	298.797	19206	43.6	Thioredoxin domain-containing protein 12	TXNDC12	#N/A	#N/A	Carbamidomethylation; Oxidation (M)	1960	Homo sapiens	#N/A	5.40308e-05	0.00322384	3.87735	1.95507	14700000	14500000	11100000	10300000	2996310	4318190	2883730	2889740
Q9BSV6	4	4	4	4	205.97	33652	15.48	tRNA-splicing endonuclease subunit Sen34	TSEN34	#N/A	#N/A	Carbamidomethylation	3425	Homo sapiens	#N/A	0.000486978	0.0113391	3.87293	1.95342	331277	310975	299888	285738	45796.9	79611.3	95030.8	113243
P51617	3	3	3	3	155.871	76537	4.92	Interleukin-1 receptor-associated kinase 1	IRAK1	#N/A	#N/A	N/A	3861	Homo sapiens	#N/A	0.00349181	0.0302604	3.82826	1.93669	336708	176631	167222	258368	61036	84524.6	77689.8	29847.8
P06865	12	11	11	11	344.546	60703	20.04	Beta-hexosaminidase subunit alpha	HEXA	#N/A	#N/A	Carbamidomethylation	1655	Homo sapiens	#N/A	4.07398e-05	0.00257903	3.82614	1.93589	3253600	3770090	2543890	3226010	871979	999404	632338	852402
Q9NUJ3	5	5	5	5	237.11	57035	12.38	T-complex protein 11-like protein 1	TCP11L1	#N/A	#N/A	N/A	3018	Homo sapiens	#N/A	0.00947887	0.0541307	3.81611	1.9321	222596	561742	168691	288961	46732.8	106944	48887	117633
P14625	71	70	69	68	566.399	92469	61.39	Endoplasmin	HSP90B1	#N/A	#N/A	Carbamidomethylation; Deamidation (NQ); Oxidation (M)	18	Homo sapiens	#N/A	0.000777061	0.0139829	3.77018	1.91463	1000000000	555000000	632000000	444000000	175000000	233000000	136000000	139000000
Q7L3T8	3	3	3	3	152.186	53263	12	Probable proline--tRNA ligase, mitochondrial	PARS2	Mitochondrial central dogma > Translation > mt-tRNA synthetases	Matrix	Carbamidomethylation	3685	Homo sapiens	Tmito	0.00516678	0.0384802	3.76528	1.91276	157927	248729	110365	275595	56704.4	61916.6	25304.4	66907.5
Q9UKM7	9	8	9	8	309.479	79580	15.16	Endoplasmic reticulum mannosyl-oligosaccharide 1,2-alpha-mannosidase	MAN1B1	#N/A	#N/A	N/A	2011	Homo sapiens	#N/A	0.00181831	0.0213158	3.72432	1.89698	956814	1455760	827072	1130000	254103	543104	231539	211756
O14646	4	4	3	3	148.492	196688	1.29	Chromodomain-helicase-DNA-binding protein 1	CHD1	#N/A	#N/A	N/A	3161	Homo sapiens	#N/A	0.00118272	0.0172458	3.71878	1.89483	426853	403157	354593	515178	132976	118616	168306	61918.8
Q9UM22	3	3	3	3	196.454	25437	14.29	Mammalian ependymin-related protein 1	EPDR1	#N/A	#N/A	Oxidation (M)	3596	Homo sapiens	#N/A	0.000570939	0.011855	3.7049	1.88944	1095890	1194010	932984	995879	163062	298250	363498	365017
Q8TE59	22	21	22	21	412.681	134048	20.38	A disintegrin and metalloproteinase with thrombospondin motifs 19	ADAMTS19	#N/A	#N/A	Carbamidomethylation	705	Homo sapiens	#N/A	0.00450652	0.0356063	3.69917	1.8872	15400000	6814650	12800000	4802260	1776560	3017940	2812070	2284980
Q96LT7	3	3	3	3	206.261	54328	7.28	Guanine nucleotide exchange factor C9orf72	C9orf72	#N/A	#N/A	N/A	3831	Homo sapiens	#N/A	0.00249196	0.0253146	3.6978	1.88667	147585	357920	140644	323049	48697	70398.4	56543	66221.7
O75063	12	12	12	12	352.917	46432	33.74	Glycosaminoglycan xylosylkinase	FAM20B	#N/A	#N/A	Carbamidomethylation; Oxidation (M)	1646	Homo sapiens	#N/A	2.80496e-06	0.000355136	3.69626	1.88606	6410980	6390720	5399380	5177800	1698880	1691490	1348540	1583500
Q06787	6	6	3	3	275.703	71174	5.85	Fragile X messenger ribonucleoprotein 1	FMR1	#N/A	#N/A	N/A	2604	Homo sapiens	#N/A	0.000188863	0.00739992	3.68855	1.88305	236260	219578	154079	204746	59031.8	43978.4	44611.2	76338.5
Q9NY61	5	5	5	5	261.598	63133	11.43	Protein AATF	AATF	#N/A	#N/A	N/A	2955	Homo sapiens	#N/A	0.00719574	0.0457899	3.68633	1.88218	382671	349014	294123	340010	35415.2	143670	115107	123496
O75340	11	11	11	11	334.033	21868	70.16	Programmed cell death protein 6	PDCD6	#N/A	#N/A	Acetylation (Protein N-term); Deamidation (NQ); Oxidation (M)	1266	Homo sapiens	#N/A	0.00209303	0.0226825	3.68394	1.88125	32100000	18500000	34800000	12200000	6055530	7073420	5430080	5885440
Q8TEQ8	4	4	4	4	220.786	118699	4.32	GPI ethanolamine phosphate transferase 3	PIGO	#N/A	#N/A	N/A	3286	Homo sapiens	#N/A	0.00290564	0.0270794	3.68258	1.88072	359932	508748	343341	535362	167985	144177	56732.5	133194
O75400	24	23	22	21	431.867	108805	19.75	Pre-mRNA-processing factor 40 homolog A	PRPF40A	#N/A	#N/A	Oxidation (M)	539	Homo sapiens	#N/A	0.00647124	0.0439472	3.6795	1.87951	8705190	13900000	4453450	14200000	1560800	2932610	2760150	3304360
O14967	16	16	15	15	379.912	70039	38.03	Calmegin	CLGN	#N/A	#N/A	Carbamidomethylation; Oxidation (M)	1079	Homo sapiens	#N/A	0.000434104	0.0108773	3.66953	1.87559	12600000	9992620	9576240	7563390	3072720	3714140	2427660	1815320
Q9Y679	5	5	5	5	237.164	45787	14.39	Lipid droplet-regulating VLDL assembly factor AUP1	AUP1	#N/A	#N/A	N/A	2837	Homo sapiens	#N/A	0.000525991	0.0113851	3.66532	1.87394	2378780	1558530	1373010	2520830	429876	657537	411216	611653
Q92896	61	57	61	57	539.584	134552	50.89	Golgi apparatus protein 1	GLG1	#N/A	#N/A	Carbamidomethylation; Deamidation (NQ); Oxidation (M)	80	Homo sapiens	#N/A	8.36338e-05	0.00434143	3.66167	1.8725	36100000	38200000	26200000	26500000	8748340	11000000	7923130	6985280
Q6NXE6	6	5	6	5	267.636	54142	12.77	Armadillo repeat-containing protein 6	ARMC6	#N/A	#N/A	Carbamidomethylation	2693	Homo sapiens	#N/A	0.00176292	0.0211905	3.63642	1.86252	823842	959936	893010	775278	125113	389921	235524	272514
Q9Y5V3	6	6	5	5	273.623	86161	4.88	Melanoma-associated antigen D1	MAGED1	#N/A	#N/A	Carbamidomethylation	2622	Homo sapiens	#N/A	0.00166618	0.0208413	3.63214	1.86082	872093	1174730	857608	1023750	146931	381205	242291	380823
P11117	8	8	8	8	266.251	48344	19.15	Lysosomal acid phosphatase	ACP2	#N/A	#N/A	Carbamidomethylation	2199	Homo sapiens	#N/A	0.00179616	0.0212492	3.60874	1.85149	1549250	1341590	1080160	1117240	325879	550716	429477	191882
Q13547	10	10	6	6	328.042	55103	18.88	Histone deacetylase 1	HDAC1	#N/A	#N/A	Carbamidomethylation; Oxidation (M)	1612	Homo sapiens	#N/A	0.00296048	0.0272963	3.59015	1.84404	621400	738219	383444	648623	135571	197140	95841.8	268105
Q14137	8	6	8	6	290.966	83630	16.49	Ribosome biogenesis protein BOP1	BOP1	#N/A	#N/A	Carbamidomethylation	2153	Homo sapiens	#N/A	0.00286136	0.0269021	3.5815	1.84056	315940	486028	618757	718728	84657.3	169922	138898	207723
Q96S59	5	5	4	4	247.274	77847	7.54	Ran-binding protein 9	RANBP9	#N/A	#N/A	N/A	2990	Homo sapiens	#N/A	0.00496754	0.0375434	3.56526	1.83401	669642	1039930	467030	1396190	283624	331227	169542	176452
Q99523	14	13	14	13	371.161	92068	17.69	Sortilin	SORT1	#N/A	#N/A	Carbamidomethylation; Oxidation (M)	1232	Homo sapiens	#N/A	0.00369179	0.0314165	3.56007	1.83191	2944750	6797970	2418000	3976850	757603	953929	1623240	1021520
Q9UBV2	20	19	20	19	408.927	88755	30.23	Protein sel-1 homolog 1	SEL1L	#N/A	#N/A	Carbamidomethylation	865	Homo sapiens	#N/A	0.000299197	0.0088246	3.55514	1.82991	3964180	3413850	2815540	2932600	1000280	1279620	882124	619513
Q86VY4	3	3	3	3	209.578	45143	13.19	Testis-specific Y-encoded-like protein 5	TSPYL5	#N/A	#N/A	Carbamidomethylation	3801	Homo sapiens	#N/A	0.000683991	0.0131747	3.53447	1.82149	460266	420398	369406	361454	68309.1	147738	106042	154697
Q9UER7	3	3	3	3	197.083	81373	6.08	Death domain-associated protein 6	DAXX	#N/A	#N/A	Carbamidomethylation	3382	Homo sapiens	#N/A	0.00101649	0.0159602	3.53006	1.81969	929123	854630	439872	700906	175518	293535	184059	166253
Q9Y5A7	6	6	6	6	264.951	70538	12.36	NEDD8 ultimate buster 1	NUB1	#N/A	#N/A	Carbamidomethylation	2654	Homo sapiens	#N/A	0.00567009	0.040774	3.50971	1.81135	786119	684880	386845	579819	128016	201882	98094.4	313935
Q9BRJ6	3	3	3	3	214.736	22083	28.35	Uncharacterized protein C7orf50	C7orf50	#N/A	#N/A	Carbamidomethylation	3568	Homo sapiens	#N/A	0.0017635	0.0211905	3.49765	1.80639	1104040	977566	777326	735472	137068	262105	326150	351855
P11717	99	98	99	98	600.241	274375	43.08	Cation-independent mannose-6-phosphate receptor	IGF2R	#N/A	#N/A	Carbamidomethylation; Deamidation (NQ); Oxidation (M)	17	Homo sapiens	#N/A	0.00144546	0.0194893	3.47926	1.79878	44600000	83500000	31500000	60600000	12600000	18600000	13800000	15000000
Q8NBS9	20	19	20	19	414.166	47629	43.75	Thioredoxin domain-containing protein 5	TXNDC5	#N/A	#N/A	Carbamidomethylation; Deamidation (NQ); Oxidation (M)	697	Homo sapiens	#N/A	0.000249636	0.00799914	3.45687	1.78947	39400000	29500000	29300000	24200000	7876600	12100000	9053030	6688850
P08758	31	30	30	30	467.813	35937	79.69	Annexin A5	ANXA5	#N/A	#N/A	Carbamidomethylation; Oxidation (M)	322	Homo sapiens	#N/A	0.000452983	0.0110396	3.44223	1.78335	114000000	153000000	74800000	93300000	24800000	28200000	38500000	32200000
Q9UBG0	29	27	29	27	456.536	166674	22.04	C-type mannose receptor 2	MRC2	#N/A	#N/A	Carbamidomethylation	449	Homo sapiens	#N/A	0.00688693	0.0447853	3.42746	1.77714	4112030	11200000	3086470	7300250	1759270	2133360	1481930	1351950
Q96S52	13	12	13	12	361.796	61656	25.77	GPI transamidase component PIG-S	PIGS	#N/A	#N/A	Acetylation (Protein N-term); Oxidation (M)	1091	Homo sapiens	#N/A	0.00033291	0.00937721	3.41845	1.77334	5793100	3652080	4148460	3478410	1364270	1639970	979772	1019870
P50995	24	24	23	23	433.177	54390	38.42	Annexin A11	ANXA11	#N/A	#N/A	Carbamidomethylation	656	Homo sapiens	#N/A	0.000279174	0.0085116	3.40837	1.76908	30100000	24100000	21000000	14400000	5605910	6883800	6148300	6850960
P61916	6	6	6	6	257.263	16570	49.01	NPC intracellular cholesterol transporter 2	NPC2	#N/A	#N/A	Carbamidomethylation; Oxidation (M)	2373	Homo sapiens	#N/A	0.000676075	0.0131747	3.40397	1.76722	3164220	2631740	2590710	2405210	1262250	677644	841799	536763
O60637	3	3	3	3	154.217	28018	9.88	Tetraspanin-3	TSPAN3	#N/A	#N/A	N/A	3539	Homo sapiens	#N/A	0.00265229	0.0260445	3.40306	1.76683	440552	301790	415041	296806	78637.3	188414	69289	118955
Q7Z4H8	15	14	15	14	377.139	58572	33.33	Protein O-glucosyltransferase 3	POGLUT3	#N/A	#N/A	Carbamidomethylation	1187	Homo sapiens	#N/A	0.000216047	0.00750615	3.39726	1.76437	4929480	3774360	3503910	3575600	1300630	1533530	829643	1057530
Q9NWM8	3	3	3	3	189.339	24172	15.64	Peptidyl-prolyl cis-trans isomerase FKBP14	FKBP14	#N/A	#N/A	Carbamidomethylation	3650	Homo sapiens	#N/A	0.00448588	0.0354973	3.3968	1.76418	1348990	1163230	957033	944873	146531	389485	450815	414263
Q96T60	13	12	13	12	357.57	57076	28.41	Bifunctional polynucleotide phosphatase/kinase	PNKP	#N/A	#N/A	Carbamidomethylation	1462	Homo sapiens	#N/A	0.00475061	0.0370276	3.38884	1.76079	1990100	2278200	1155910	1933690	276972	661532	828738	506023
Q7Z7H5	10	10	9	9	318.492	25943	35.68	Transmembrane emp24 domain-containing protein 4	TMED4	#N/A	#N/A	Oxidation (M)	1509	Homo sapiens	#N/A	3.44131e-05	0.0024471	3.38585	1.75952	6210730	6916440	7143120	6306530	1852600	2055230	1525070	2535720
P37198	5	5	5	5	233.735	53255	14.75	Nuclear pore glycoprotein p62	NUP62	#N/A	#N/A	Carbamidomethylation	2912	Homo sapiens	#N/A	0.00019654	0.00739992	3.38004	1.75704	753651	542198	696073	503433	206011	154438	145510	236972
O14657	7	7	7	7	282.701	37979	22.32	Torsin-1B	TOR1B	#N/A	#N/A	Carbamidomethylation; Deamidation (NQ)	2284	Homo sapiens	#N/A	1.78987e-05	0.0014748	3.36153	1.74912	2605290	2776240	2410270	2469600	818827	943072	607363	718910
O75976	48	47	48	47	516.111	152931	38.62	Carboxypeptidase D	CPD	#N/A	#N/A	Carbamidomethylation; Deamidation (NQ); Oxidation (M)	136	Homo sapiens	#N/A	3.03244e-05	0.0022171	3.35503	1.74633	33900000	40300000	24600000	28500000	9235330	9757690	9022400	9297750
O00116	32	32	32	32	470.867	72912	54.41	Alkyldihydroxyacetonephosphate synthase, peroxisomal	AGPS	#N/A	#N/A	Carbamidomethylation; Deamidation (NQ); Oxidation (M)	278	Homo sapiens	#N/A	0.0018674	0.0214937	3.33397	1.73724	18700000	15000000	34400000	16600000	4201300	7658190	5814030	6930560
O60762	14	13	14	13	369.344	29634	53.85	Dolichol-phosphate mannosyltransferase subunit 1	DPM1	#N/A	#N/A	Deamidation (NQ); Oxidation (M)	1163	Homo sapiens	#N/A	0.0028647	0.0269021	3.33323	1.73692	13100000	19600000	10200000	19300000	2916220	4274770	4437560	7401900
Q8IXM6	4	4	4	4	204.186	29379	17.18	Nurim	NRM	#N/A	#N/A	N/A	3200	Homo sapiens	#N/A	0.000177942	0.00712136	3.32576	1.73369	1403940	1314010	1197240	1497920	324771	411682	339066	596526
P30154	14	14	7	7	368.923	66214	17.3	Serine/threonine-protein phosphatase 2A 65 kDa regulatory subunit A beta isoform	PPP2R1B	#N/A	#N/A	N/A	1317	Homo sapiens	#N/A	0.00310546	0.0280844	3.32127	1.73174	1278310	1748540	611285	1542510	312765	461815	375068	319721
Q9H488	11	11	11	11	336.648	43956	41.24	GDP-fucose protein O-fucosyltransferase 1	POFUT1	#N/A	#N/A	Carbamidomethylation; Oxidation (M)	1463	Homo sapiens	#N/A	5.76627e-05	0.00336323	3.31928	1.73087	5233400	5217240	5186140	4746220	1546610	2016250	1564090	1135150
Q8NBM8	6	6	6	6	261.716	54646	16.4	Prenylcysteine oxidase-like	PCYOX1L	#N/A	#N/A	N/A	2800	Homo sapiens	#N/A	0.00684334	0.0446906	3.31312	1.72819	2209780	1991700	923344	2784530	536617	548722	367540	867792
Q658P3	4	3	4	3	213.48	54601	6.35	Metalloreductase STEAP3	STEAP3	#N/A	#N/A	Carbamidomethylation	3390	Homo sapiens	#N/A	0.00887548	0.0525943	3.28683	1.7167	268753	466309	124316	405094	83859.9	108408	88181.5	67453.5
Q9ULR0	6	6	6	6	272.809	32992	26.67	Pre-mRNA-splicing factor ISY1 homolog	ISY1	#N/A	#N/A	Carbamidomethylation	2806	Homo sapiens	#N/A	0.00497312	0.0375434	3.28545	1.71609	1656870	1132660	881775	652822	319394	526608	248309	222001
P38606	37	36	37	36	484.047	68304	56.24	V-type proton ATPase catalytic subunit A	ATP6V1A	#N/A	#N/A	Carbamidomethylation; Deamidation (NQ); Oxidation (M)	213	Homo sapiens	#N/A	0.000144034	0.00628302	3.28289	1.71497	57800000	65200000	44400000	53800000	17500000	22600000	13800000	14200000
P18858	9	9	9	9	309.053	101736	13.38	DNA ligase 1	LIG1	#N/A	#N/A	Carbamidomethylation	2084	Homo sapiens	#N/A	0.00323064	0.0287161	3.27684	1.71231	1196680	1166810	977613	992880	408252	397083	158600	457201
Q8WYA6	8	8	8	8	299.069	65173	15.28	Beta-catenin-like protein 1	CTNNBL1	#N/A	#N/A	Carbamidomethylation	2156	Homo sapiens	#N/A	0.0063687	0.0434999	3.25938	1.7046	583648	1113020	397406	795451	120470	280596	218733	246087
Q03426	6	6	6	6	269.672	42451	26.01	Mevalonate kinase	MVK	#N/A	#N/A	Carbamidomethylation; Deamidation (NQ)	2503	Homo sapiens	#N/A	0.00134714	0.0187984	3.23768	1.69496	975839	1402250	600000	1095450	289179	327528	227380	380053
P15586	8	8	8	8	306.329	62082	14.86	N-acetylglucosamine-6-sulfatase	GNS	#N/A	#N/A	N/A	2165	Homo sapiens	#N/A	0.000853955	0.0148257	3.23342	1.69306	4868630	4065100	2983390	3866840	1165550	1263090	1768050	802480
P07858	8	8	8	8	315.282	37822	29.79	Cathepsin B	CTSB	#N/A	#N/A	Carbamidomethylation	2276	Homo sapiens	#N/A	1.25677e-05	0.00110574	3.22638	1.68992	4340160	3954640	3137080	4292410	1178380	1363720	1077720	1231570
P27824	46	45	45	44	515.659	67568	49.66	Calnexin	CANX	#N/A	#N/A	Carbamidomethylation; Deamidation (NQ); Oxidation (M)	124	Homo sapiens	#N/A	0.00189905	0.0217136	3.21683	1.68564	378000000	257000000	312000000	197000000	64300000	130000000	102000000	65400000
Q8NHP8	13	13	13	13	347.56	65472	22.07	Putative phospholipase B-like 2	PLBD2	#N/A	#N/A	Carbamidomethylation	1513	Homo sapiens	#N/A	0.000338273	0.00939023	3.21511	1.68487	4986510	5089300	4528820	3886300	1301870	2175080	1356820	1088000
Q14554	13	12	13	12	354.76	59594	29.67	Protein disulfide-isomerase A5	PDIA5	#N/A	#N/A	Carbamidomethylation	1430	Homo sapiens	#N/A	0.00430242	0.0346799	3.21039	1.68275	3156320	2003110	1900080	1542740	575858	948737	860058	371306
Q96HR9	3	3	3	3	173.396	23418	15.64	Receptor expression-enhancing protein 6	REEP6	#N/A	#N/A	N/A	3569	Homo sapiens	#N/A	0.00195907	0.0222529	3.20489	1.68027	421557	564385	490975	588709	122604	156020	117095	291016
O43172	17	17	17	17	400.76	58449	48.66	U4/U6 small nuclear ribonucleoprotein Prp4	PRPF4	#N/A	#N/A	Carbamidomethylation; Deamidation (NQ)	860	Homo sapiens	#N/A	0.00183075	0.0214041	3.20015	1.67814	7136340	11900000	5147220	10100000	2086440	3194670	2088430	3024030
P80303	11	11	11	11	342.775	50223	29.52	Nucleobindin-2	NUCB2	#N/A	#N/A	Oxidation (M)	1667	Homo sapiens	#N/A	0.00338487	0.0296805	3.19973	1.67795	16600000	7936540	8037120	7618580	4382140	2821460	1984010	3137300
Q99943	3	3	3	3	181.319	31717	13.78	1-acyl-sn-glycerol-3-phosphate acyltransferase alpha	AGPAT1	#N/A	#N/A	Carbamidomethylation	3632	Homo sapiens	#N/A	0.00237816	0.0246747	3.19821	1.67727	669735	415878	422565	448904	131790	189225	90369.3	224081
P50454	24	24	24	24	440.61	46441	61	Serpin H1	SERPINH1	#N/A	#N/A	Deamidation (NQ); Oxidation (M)	453	Homo sapiens	#N/A	0.000702283	0.0133537	3.18523	1.6714	75100000	47800000	57800000	40500000	16500000	24200000	14100000	14500000
Q14671	7	6	3	3	253.614	126473	3.37	Pumilio homolog 1	PUM1	#N/A	#N/A	N/A	2355	Homo sapiens	#N/A	0.00467756	0.0366371	3.18508	1.67133	333287	577564	237107	481927	106572	132856	81144.8	186030
P55769	4	4	4	4	221.276	14174	37.5	NHP2-like protein 1	SNU13	#N/A	#N/A	Carbamidomethylation	3342	Homo sapiens	#N/A	0.00011155	0.00536164	3.1811	1.66953	2125660	2145180	1531950	2075700	536155	525563	615394	816565
P29692	12	12	12	12	351.655	31122	55.52	Elongation factor 1-delta	EEF1D	#N/A	#N/A	Acetylation (Protein N-term); Carbamidomethylation; Oxidation (M)	1511	Homo sapiens	#N/A	0.000510255	0.0113851	3.17407	1.66633	22500000	23200000	21700000	21100000	6785750	7802650	4449470	9995400
Q587I9	4	4	4	4	238.523	21790	26.98	Vesicle transport protein SFT2C	SFT2D3	#N/A	#N/A	Carbamidomethylation	3263	Homo sapiens	#N/A	0.00813081	0.049674	3.14405	1.65262	1215420	1326810	714145	893810	316398	380952	546909	159804
O00461	28	26	28	26	448.796	81880	43.39	Golgi integral membrane protein 4	GOLIM4	#N/A	#N/A	Oxidation (M)	523	Homo sapiens	#N/A	0.00114381	0.0168202	3.13862	1.65013	12400000	11400000	8250790	9325500	2881030	2729770	5459290	2610550
P16401	16	15	12	11	386.579	22580	25.22	Histone H1.5	H1-5	#N/A	#N/A	Acetylation (Protein N-term); Deamidation (NQ)	822	Homo sapiens	#N/A	0.00112839	0.0166592	3.13496	1.64845	108000000	145000000	69600000	104000000	29500000	47300000	31500000	26700000
P55795	18	18	8	8	404.995	49264	30.07	Heterogeneous nuclear ribonucleoprotein H2	HNRNPH2	#N/A	#N/A	Carbamidomethylation; Oxidation (M)	672	Homo sapiens	#N/A	0.000354094	0.00967422	3.13482	1.64838	7948800	6386560	4840960	4852070	1459440	1962090	1798770	2397160
Q9NQX7	6	6	6	6	282.034	30224	32.96	Integral membrane protein 2C	ITM2C	#N/A	#N/A	Carbamidomethylation	2737	Homo sapiens	#N/A	0.00367969	0.031365	3.12888	1.64565	1376110	2804290	1631060	1655680	648722	879081	347145	549243
Q96AQ6	15	15	15	15	371.923	80643	23.8	Pre-B-cell leukemia transcription factor-interacting protein 1	PBXIP1	#N/A	#N/A	Carbamidomethylation	1238	Homo sapiens	#N/A	0.000954904	0.0158708	3.12485	1.64379	2605780	1986110	1487360	1558190	559213	794662	679160	416801
Q8TB61	5	4	5	4	237.672	47515	9.26	Adenosine 3'-phospho 5'-phosphosulfate transporter 1	SLC35B2	#N/A	#N/A	N/A	3074	Homo sapiens	#N/A	0.00101529	0.0159602	3.12221	1.64257	1452510	1959600	1070880	1691790	416572	510865	364864	698877
Q5SY16	9	9	9	9	320.739	79323	17.24	Polynucleotide 5'-hydroxyl-kinase NOL9	NOL9	#N/A	#N/A	Carbamidomethylation	1955	Homo sapiens	#N/A	0.00639233	0.043604	3.12016	1.64162	945177	1087180	667756	1430810	414428	254803	189461	517761
Q96G21	7	6	7	6	294.535	33757	21.31	U3 small nucleolar ribonucleoprotein protein IMP4	IMP4	#N/A	#N/A	N/A	2492	Homo sapiens	#N/A	0.0046222	0.0364095	3.11358	1.63857	5275580	2028070	3070690	4571930	793098	1287780	1539020	1016810
O14733	3	3	3	3	170.139	47485	6.68	Dual specificity mitogen-activated protein kinase kinase 7	MAP2K7	#N/A	#N/A	Carbamidomethylation	3887	Homo sapiens	#N/A	0.00621758	0.043149	3.10822	1.63609	296638	358966	200962	327705	188310	78665	82831.4	61232.4
Q9P0M6	24	24	22	22	441.603	40058	52.96	Core histone macro-H2A.2	MACROH2A2	#N/A	#N/A	Carbamidomethylation; Deamidation (NQ); Oxidation (M)	556	Homo sapiens	#N/A	0.00650293	0.0440114	3.10501	1.6346	12400000	26000000	7757400	17800000	3520190	5250050	4626970	5600830
P36578	34	33	34	33	475.324	47697	55.04	60S ribosomal protein L4	RPL4	#N/A	#N/A	Acetylation (Protein N-term); Carbamidomethylation; Deamidation (NQ); Oxidation (M)	224	Homo sapiens	#N/A	0.00685295	0.0446906	3.09817	1.63142	77700000	157000000	62600000	147000000	25700000	44100000	24600000	43700000
O43688	4	3	4	3	231.485	32574	11.11	Phospholipid phosphatase 2	PLPP2	#N/A	#N/A	Carbamidomethylation	3227	Homo sapiens	#N/A	0.002726	0.0263468	3.0936	1.62928	693167	936423	467773	567248	261825	302697	157201	150935
Q6ZXV5	6	6	6	6	243.169	104009	8.42	Protein O-mannosyl-transferase TMTC3	TMTC3	#N/A	#N/A	Carbamidomethylation	2637	Homo sapiens	#N/A	0.000942189	0.0158306	3.08925	1.62726	677910	939512	679612	1310210	287724	337307	210623	304617
P11908	15	15	6	6	367.29	34769	24.21	Ribose-phosphate pyrophosphokinase 2	PRPS2	#N/A	#N/A	N/A	1020	Homo sapiens	#N/A	0.00740607	0.0465999	3.08697	1.62619	2589020	2316270	1272330	2652920	612511	533201	509971	1338340
Q9NV31	5	5	5	5	249.942	21850	36.41	U3 small nucleolar ribonucleoprotein protein IMP3	IMP3	#N/A	#N/A	Carbamidomethylation	2869	Homo sapiens	#N/A	0.000521978	0.0113851	3.08446	1.62502	627510	898847	583403	901868	168765	278072	245606	284458
P13473	4	4	4	4	222.758	44961	8.78	Lysosome-associated membrane glycoprotein 2	LAMP2	#N/A	#N/A	Carbamidomethylation	3293	Homo sapiens	#N/A	3.89274e-05	0.00249472	3.07564	1.62088	3371910	2813460	2417910	2941710	1116460	993371	771644	881142
Q8WY21	18	17	18	17	396.5	129635	16.78	VPS10 domain-containing receptor SorCS1	SORCS1	#N/A	#N/A	Carbamidomethylation	1036	Homo sapiens	#N/A	0.000270848	0.00831935	3.07517	1.62067	4979490	4898420	3687220	3551640	1218490	1723220	1050380	1619510
P61018	5	4	3	3	253.164	23587	18.31	Ras-related protein Rab-4B	RAB4B	#N/A	#N/A	Acetylation (Protein N-term); Carbamidomethylation	2942	Homo sapiens	#N/A	0.00139492	0.0190554	3.06493	1.61585	211687	298640	165187	347176	94539.6	78502.9	59121.1	93636.3
P40938	20	20	20	20	413.706	40556	59.27	Replication factor C subunit 3	RFC3	#N/A	#N/A	Acetylation (Protein N-term); Carbamidomethylation	791	Homo sapiens	#N/A	0.00244422	0.0249762	3.03104	1.59981	7358460	7762540	4909620	5338610	1266070	2116330	2065990	3204270
Q9P0K1	20	19	20	19	402.514	100433	28.37	Disintegrin and metalloproteinase domain-containing protein 22	ADAM22	#N/A	#N/A	Carbamidomethylation; Oxidation (M)	862	Homo sapiens	#N/A	0.00199882	0.0224586	3.02809	1.59841	4759940	5359090	3442880	3480150	1627510	2127100	996269	1054020
Q86TG7	3	3	3	3	194.948	80173	5.65	Retrotransposon-derived protein PEG10	PEG10	#N/A	#N/A	Carbamidomethylation	3782	Homo sapiens	#N/A	3.73082e-05	0.00248291	3.02592	1.59737	378189	471937	363385	348601	146627	139563	103430	127417
Q9H4L4	10	10	10	10	330.785	65010	19.69	Sentrin-specific protease 3	SENP3	#N/A	#N/A	Carbamidomethylation	1937	Homo sapiens	#N/A	0.000683747	0.0131747	3.02462	1.59675	658082	946929	562995	1030620	340291	235880	237596	226535
P37108	8	8	8	8	307.196	14570	44.12	Signal recognition particle 14 kDa protein	SRP14	#N/A	#N/A	N/A	2232	Homo sapiens	#N/A	0.000401818	0.0104454	3.0132	1.5913	6595290	5235060	4321200	3354040	1746140	1669500	1320340	1577120
Q6RFH5	5	5	5	5	245.012	42441	17.66	WD repeat-containing protein 74	WDR74	#N/A	#N/A	Carbamidomethylation	2996	Homo sapiens	#N/A	0.00412653	0.0339474	3.01113	1.5903	513209	597487	449398	798923	173089	172929	128421	348393
Q9Y3U8	5	5	5	5	257.618	12254	30.48	60S ribosomal protein L36	RPL36	#N/A	#N/A	Carbamidomethylation; Oxidation (M)	2369	Homo sapiens	#N/A	0.00411011	0.0339172	3.0029	1.58636	10900000	18000000	8176970	18100000	2902700	5464580	4244860	5303760
Q86UV5	11	11	11	11	328.468	119032	12.66	Ubiquitin carboxyl-terminal hydrolase 48	USP48	#N/A	#N/A	Carbamidomethylation; Oxidation (M)	1715	Homo sapiens	#N/A	0.00149492	0.0197072	2.9983	1.58414	1125590	1809170	826396	1557020	345718	485567	376839	512529
Q9BWF3	15	15	4	4	375.899	40314	24.45	RNA-binding protein 4	RBM4	#N/A	#N/A	Carbamidomethylation	1294	Homo sapiens	#N/A	0.00174247	0.0211905	2.99501	1.58256	1287330	981608	678725	887030	205668	379605	293411	412757
Q9H3N1	11	11	11	11	340.001	31791	33.21	Thioredoxin-related transmembrane protein 1	TMX1	#N/A	#N/A	Carbamidomethylation; Deamidation (NQ)	1563	Homo sapiens	#N/A	5.37159e-05	0.00322384	2.99297	1.58158	12900000	10400000	12900000	8924550	3251380	4158530	3485200	4084620
Q9NW13	15	15	15	15	363.274	85738	21.74	RNA-binding protein 28	RBM28	#N/A	#N/A	Acetylation (Protein N-term); Carbamidomethylation; Oxidation (M)	1252	Homo sapiens	#N/A	0.00181166	0.0213158	2.98687	1.57863	2984180	2877490	1911630	2556110	525028	943020	856857	1242640
Q9Y394	14	14	14	14	370.415	38299	47.79	Dehydrogenase/reductase SDR family member 7	DHRS7	#N/A	#N/A	Carbamidomethylation; Deamidation (NQ); Oxidation (M)	1154	Homo sapiens	#N/A	0.000121109	0.00573098	2.96929	1.57012	16000000	12800000	11600000	11000000	3971120	5343450	3475650	4558300
Q9UKV3	15	15	15	15	370.831	151862	14.39	Apoptotic chromatin condensation inducer in the nucleus	ACIN1	#N/A	#N/A	Carbamidomethylation	1244	Homo sapiens	#N/A	0.00175697	0.0211905	2.96699	1.569	10500000	6039000	4937770	4462630	1865820	2424920	2214290	1799730
Q9UIQ6	17	16	17	16	376.226	117349	14.83	Leucyl-cystinyl aminopeptidase	LNPEP	#N/A	#N/A	Carbamidomethylation	1110	Homo sapiens	#N/A	0.00304677	0.0277957	2.96649	1.56876	2134880	3533340	2704110	2647230	920327	1105170	1320770	519041
Q9BSD7	8	8	8	8	317.249	20713	58.95	Cancer-related nucleoside-triphosphatase	NTPCR	#N/A	#N/A	Carbamidomethylation	2281	Homo sapiens	#N/A	0.0057982	0.0413441	2.95066	1.56104	4535120	5597840	5897530	4774080	884279	1639710	2465470	2637750
Q14684	6	6	6	6	263.592	84428	9.63	Ribosomal RNA processing protein 1 homolog B	RRP1B	#N/A	#N/A	Carbamidomethylation	2770	Homo sapiens	#N/A	0.00223739	0.0237511	2.94747	1.55948	1236090	923712	714502	725344	186186	380308	290406	381283
O15127	6	6	6	6	272.777	36649	18.24	Secretory carrier-associated membrane protein 2	SCAMP2	#N/A	#N/A	Deamidation (NQ)	2221	Homo sapiens	#N/A	0.00198261	0.0223248	2.94735	1.55942	2735140	4136550	1895490	2668360	1075870	1062500	1056130	628128
O14656	11	11	10	10	345.694	37809	35.54	Torsin-1A	TOR1A	#N/A	#N/A	Carbamidomethylation	1666	Homo sapiens	#N/A	7.45994e-05	0.00409272	2.94405	1.5578	4906690	4294350	4716030	3379550	1382580	1778980	1238530	1467470
Q13286	3	3	3	3	183.749	47623	10.5	Battenin	CLN3	#N/A	#N/A	N/A	3563	Homo sapiens	#N/A	0.00197746	0.0223152	2.94361	1.55759	252069	412273	211890	329262	102613	147729	81879.8	77802
Q96KR1	7	7	7	7	276.03	117012	8.01	Zinc finger RNA-binding protein	ZFR	#N/A	#N/A	Carbamidomethylation	2439	Homo sapiens	#N/A	0.00181679	0.0213158	2.93507	1.5534	699981	628828	449737	356440	147354	234316	204103	134920
Q8NBZ7	4	4	4	4	221.195	47577	16.9	UDP-glucuronic acid decarboxylase 1	UXS1	#N/A	#N/A	N/A	3336	Homo sapiens	#N/A	0.0028216	0.0268751	2.93109	1.55144	407781	918653	449295	517357	150479	214892	148962	244911
Q8WX93	8	8	8	8	293.966	150564	6.8	Palladin	PALLD	#N/A	#N/A	Carbamidomethylation	2308	Homo sapiens	#N/A	0.0015892	0.020319	2.93084	1.55131	1791500	1812310	1167380	1571810	624778	787448	373150	439806
O75352	3	3	3	3	209.364	26638	13.77	Mannose-P-dolichol utilization defect 1 protein	MPDU1	#N/A	#N/A	Acetylation (Protein N-term)	3767	Homo sapiens	#N/A	0.00228822	0.0240936	2.91808	1.54502	5834250	6281830	4051620	7158120	2179790	2452560	1172230	2339150
Q14697	48	48	48	48	521.37	106874	52.12	Neutral alpha-glucosidase AB	GANAB	#N/A	#N/A	Carbamidomethylation; Deamidation (NQ); Oxidation (M)	122	Homo sapiens	#N/A	6.00668e-05	0.00346452	2.90481	1.53844	230000000	213000000	187000000	188000000	67600000	90200000	57000000	69600000
O75915	3	3	3	3	206.872	21615	20.74	PRA1 family protein 3	ARL6IP5	#N/A	#N/A	Acetylation (Protein N-term); Oxidation (M)	3327	Homo sapiens	#N/A	0.00426008	0.0344817	2.89538	1.53375	1285420	1574310	678397	1557140	430779	557214	293768	431359
Q9NX24	4	4	4	4	232.843	17201	37.91	H/ACA ribonucleoprotein complex subunit 2	NHP2	#N/A	#N/A	Carbamidomethylation; Deamidation (NQ)	3094	Homo sapiens	#N/A	0.00121515	0.0176197	2.89503	1.53358	3313760	3644360	1780300	3116370	768963	973181	1113510	1144670
Q9NVP1	18	17	18	17	390.185	75407	26.12	ATP-dependent RNA helicase DDX18	DDX18	#N/A	#N/A	Carbamidomethylation; Deamidation (NQ); Oxidation (M)	931	Homo sapiens	#N/A	0.00366382	0.0313326	2.89109	1.53161	4343480	7260080	3270030	7619500	1363750	1940550	2249550	1889100
Q96KA5	6	6	6	6	283.036	62229	16.54	Lipid scramblase CLPTM1L	CLPTM1L	#N/A	#N/A	Oxidation (M)	2594	Homo sapiens	#N/A	0.00196452	0.022266	2.8867	1.52942	2351720	2641320	2311550	2643090	526994	1384280	802432	933634
Q8TB96	10	10	10	10	327.524	68108	22.22	T-cell immunomodulatory protein	ITFG1	#N/A	#N/A	Carbamidomethylation	1876	Homo sapiens	#N/A	0.00125289	0.017839	2.87923	1.52568	1367720	1654260	1668890	1250120	496943	740477	571226	326776
Q9P2K5	16	15	16	15	377.782	64122	25.33	Myelin expression factor 2	MYEF2	#N/A	#N/A	Acetylation (Protein N-term); Carbamidomethylation; Oxidation (M)	1047	Homo sapiens	#N/A	0.0046642	0.0366291	2.87509	1.52361	4022680	3575870	2209300	2687280	622435	1373500	1495380	977655
Q52LJ0	7	6	5	4	296.432	45547	11.55	Protein FAM98B	FAM98B	#N/A	#N/A	Carbamidomethylation; Oxidation (M)	2219	Homo sapiens	#N/A	0.0020344	0.0224952	2.86981	1.52095	61700000	59100000	36000000	46300000	14200000	24200000	21200000	12300000
Q14108	15	15	15	15	380.157	54290	30.33	Lysosome membrane protein 2	SCARB2	#N/A	#N/A	Carbamidomethylation; Deamidation (NQ); Oxidation (M)	729	Homo sapiens	#N/A	0.00159974	0.0204036	2.86971	1.52091	69600000	47600000	61500000	43200000	19700000	24400000	22500000	12000000
Q9Y282	10	10	10	10	331.877	43222	25.85	Endoplasmic reticulum-Golgi intermediate compartment protein 3	ERGIC3	#N/A	#N/A	Carbamidomethylation	1842	Homo sapiens	#N/A	0.000337143	0.00939023	2.86194	1.51699	3702690	2441040	2424060	2109770	1006100	1068670	830766	771374
Q9UQC2	5	5	5	5	248.55	74458	8.88	GRB2-associated-binding protein 2	GAB2	#N/A	#N/A	Acetylation (Protein N-term); Carbamidomethylation	2846	Homo sapiens	#N/A	0.00572515	0.0410246	2.85743	1.51472	749245	494817	366185	375089	212597	208758	96022.4	179238
Q13162	18	18	15	15	396.9	30540	63.1	Peroxiredoxin-4	PRDX4	Metabolism > Detoxification > ROS and glutathione metabolism	IMS	Carbamidomethylation	916	Homo sapiens	Tmito	0.000550649	0.0115725	2.8454	1.50863	50900000	32000000	46300000	28800000	11300000	15600000	12700000	14800000
O94874	15	15	15	15	371.524	89595	21.16	E3 UFM1-protein ligase 1	UFL1	#N/A	#N/A	Carbamidomethylation	1220	Homo sapiens	#N/A	0.000269105	0.00831504	2.82367	1.49757	2080320	2437710	2763230	2053810	685014	740195	772910	1155210
P30533	15	15	14	14	359.764	41466	36.41	Alpha-2-macroglobulin receptor-associated protein	LRPAP1	#N/A	#N/A	N/A	1216	Homo sapiens	#N/A	0.000529258	0.0113851	2.82315	1.4973	5642550	4682690	4340580	4153270	1094790	1991580	1887990	1821570
P25686	5	4	4	3	250.778	35580	11.73	DnaJ homolog subfamily B member 2	DNAJB2	#N/A	#N/A	Acetylation (Protein N-term)	3030	Homo sapiens	#N/A	0.00431741	0.0346888	2.82221	1.49682	392383	374716	182222	279105	78344.3	123628	83082.9	146485
Q96FN4	17	17	16	16	394.883	61190	32.85	Copine-2	CPNE2	#N/A	#N/A	Carbamidomethylation	1103	Homo sapiens	#N/A	0.00101146	0.0159602	2.81777	1.49455	2519540	3223970	2424120	2742380	925900	1370800	630828	1069840
O15258	6	6	6	6	270.477	22958	31.63	Protein RER1	RER1	#N/A	#N/A	Acetylation (Protein N-term)	2497	Homo sapiens	#N/A	1.08834e-05	0.00100886	2.81675	1.49403	5974270	7249350	5347740	6633660	1978850	2264010	2269040	2400940
Q92598	39	39	35	35	494.218	96865	44.06	Heat shock protein 105 kDa	HSPH1	#N/A	#N/A	Acetylation (Protein N-term); Carbamidomethylation; Deamidation (NQ); Oxidation (M)	208	Homo sapiens	#N/A	0.000281953	0.0085116	2.8136	1.49242	37800000	35700000	26900000	34700000	11500000	14500000	8734600	13800000
P49354	5	4	5	4	244.776	44409	11.35	Protein farnesyltransferase/geranylgeranyltransferase type-1 subunit alpha	FNTA	#N/A	#N/A	Carbamidomethylation	2983	Homo sapiens	#N/A	0.00309108	0.0280032	2.81343	1.49233	493943	1017770	1195780	944326	368607	351670	242673	288030
A0AVT1	44	44	44	44	503.184	117970	47.91	Ubiquitin-like modifier-activating enzyme 6	UBA6	#N/A	#N/A	Carbamidomethylation; Deamidation (NQ); Oxidation (M)	199	Homo sapiens	#N/A	0.000519782	0.0113851	2.81119	1.49118	17800000	26800000	14200000	23500000	6329130	6641030	7409210	8184680
P51571	7	7	7	7	303.534	18999	38.15	Translocon-associated protein subunit delta	SSR4	#N/A	#N/A	Deamidation (NQ); Oxidation (M)	1956	Homo sapiens	#N/A	9.16718e-05	0.00466538	2.80084	1.48586	13000000	9857490	12600000	9548070	3455610	4376770	3521500	4703700
Q4G148	3	3	3	3	169.334	50567	7.27	Glucoside xylosyltransferase 1	GXYLT1	#N/A	#N/A	N/A	3657	Homo sapiens	#N/A	0.00149879	0.0197072	2.79939	1.48511	312628	460613	372396	397647	123781	208649	144731	92893.7
P53634	11	11	11	11	344.211	51854	25.7	Dipeptidyl peptidase 1	CTSC	#N/A	#N/A	Carbamidomethylation; Oxidation (M)	1619	Homo sapiens	#N/A	0.000126962	0.00573098	2.79642	1.48358	8319150	7000080	7995740	5688040	2155270	2776150	2343260	3089090
Q9Y2Q3	5	5	5	5	260.806	25497	27.43	Glutathione S-transferase kappa 1	GSTK1	Metabolism > Detoxification > Xenobiotic metabolism	Matrix	Oxidation (M)	2522	Homo sapiens	Tmito	0.00274583	0.0264445	2.79553	1.48312	4839380	2837220	4087810	2648920	1024310	1861720	948248	1346230
P53801	5	5	5	5	249.913	20324	26.67	Pituitary tumor-transforming gene 1 protein-interacting protein	PTTG1IP	#N/A	#N/A	Carbamidomethylation	2953	Homo sapiens	#N/A	0.000410335	0.0104537	2.77751	1.47379	4662600	3728030	3878380	3170150	1234790	1946550	1114090	1341020
Q9NY12	7	7	7	7	300.037	22348	34.56	H/ACA ribonucleoprotein complex subunit 1	GAR1	#N/A	#N/A	Carbamidomethylation	2459	Homo sapiens	#N/A	0.00261206	0.0257779	2.77618	1.4731	3893860	6453660	2880400	5459300	1494820	2006970	1252130	1770940
Q9BUJ2	26	26	25	25	439.45	95739	34.93	Heterogeneous nuclear ribonucleoprotein U-like protein 1	HNRNPUL1	#N/A	#N/A	Carbamidomethylation; Oxidation (M)	516	Homo sapiens	#N/A	0.000840644	0.0146929	2.77601	1.47301	14500000	22200000	11500000	19600000	4879870	6990730	5979140	5989920
Q6PJG6	15	13	14	12	371.083	88119	22.78	BRCA1-associated ATM activator 1	BRAT1	#N/A	#N/A	Carbamidomethylation; Deamidation (NQ)	1200	Homo sapiens	#N/A	0.000474162	0.0112651	2.76958	1.46967	1210860	1216820	1172040	1320200	321491	565490	571770	372765
P43307	4	4	4	4	236.239	32235	19.93	Translocon-associated protein subunit alpha	SSR1	#N/A	#N/A	N/A	3211	Homo sapiens	#N/A	0.00617803	0.0429895	2.76262	1.46604	10300000	6987380	7844390	6480710	2105500	2537440	2155000	5455670
P22307	8	7	8	7	293.214	58994	9.69	Sterol carrier protein 2	SCP2	Metabolism > Lipid metabolism > Cholesterol, bile acid, steroid synthesis	MIM	Oxidation (M)	2201	Homo sapiens	Tpossible_mito	0.00205012	0.0224993	2.75647	1.46282	4256750	2888930	3746670	2895480	803877	1113210	1480660	1743990
Q15029	43	42	42	41	505.19	109436	49.59	116 kDa U5 small nuclear ribonucleoprotein component	EFTUD2	#N/A	#N/A	Carbamidomethylation; Oxidation (M)	189	Homo sapiens	#N/A	0.00883889	0.0524887	2.75202	1.46049	18800000	34400000	16300000	44500000	7673170	10900000	8014900	12200000
Q8TAG9	6	6	5	5	253.274	93722	7.71	Exocyst complex component 6	EXOC6	#N/A	#N/A	Carbamidomethylation	2358	Homo sapiens	#N/A	0.00647203	0.0439472	2.74805	1.45841	218490	406548	163583	292102	60198.9	109955	118990	94494.6
Q9BXY0	6	6	6	6	275.478	35369	26	Protein MAK16 homolog	MAK16	#N/A	#N/A	Carbamidomethylation	2824	Homo sapiens	#N/A	0.0041516	0.0340457	2.74249	1.45549	1327840	988407	732701	819773	238278	395909	274974	537216
O15173	12	12	10	10	351.532	23818	43.5	Membrane-associated progesterone receptor component 2	PGRMC2	#N/A	#N/A	Carbamidomethylation	1537	Homo sapiens	#N/A	0.00536079	0.0390292	2.72788	1.44778	9714480	4551910	7947810	4115010	1678120	2744690	2550760	2223020
Q8NFH4	5	5	5	5	260.841	36708	22.09	Nucleoporin Nup37	NUP37	#N/A	#N/A	Carbamidomethylation	3047	Homo sapiens	#N/A	0.000406469	0.0104454	2.72774	1.4477	894790	1135560	737953	1145130	382962	363388	268226	415510
Q9UBP9	5	5	5	5	219.923	34490	12.83	PTB domain-containing engulfment adapter protein 1	GULP1	#N/A	#N/A	Carbamidomethylation	2936	Homo sapiens	#N/A	0.000198029	0.00739992	2.71878	1.44296	1725180	1760840	1644700	1520830	462400	543437	710792	778605
P51665	17	17	17	17	395.773	37025	53.7	26S proteasome non-ATPase regulatory subunit 7	PSMD7	#N/A	#N/A	Carbamidomethylation; Oxidation (M)	908	Homo sapiens	#N/A	0.000844784	0.0147157	2.71684	1.44193	18900000	33000000	16600000	22100000	6824820	9354550	8137560	8083690
P49257	21	21	20	20	413.774	57549	39.02	Protein ERGIC-53	LMAN1	#N/A	#N/A	Carbamidomethylation; Deamidation (NQ); Oxidation (M)	605	Homo sapiens	#N/A	0.000631201	0.0126508	2.7031	1.43461	33100000	23300000	24200000	20300000	8553110	12300000	9419300	7161440
P37235	9	9	9	9	325.271	22313	51.3	Hippocalcin-like protein 1	HPCAL1	#N/A	#N/A	Carbamidomethylation	2129	Homo sapiens	#N/A	0.000443905	0.0109209	2.6922	1.42878	4879610	6343620	3593760	5379820	1593890	1634380	1981530	2206990
O75531	8	8	8	8	294.708	10059	79.78	Barrier-to-autointegration factor	BANF1	#N/A	#N/A	Carbamidomethylation; Oxidation (M)	1899	Homo sapiens	#N/A	0.000532959	0.0113851	2.69106	1.42817	2694920	3829260	2375360	3223620	854170	1104640	1121600	1423760
Q16774	8	8	8	8	290.738	21726	64.47	Guanylate kinase	GUK1	Metabolism > Nucleotide metabolism > Nucleotide synthesis and processing	Matrix	Acetylation (Protein N-term); Carbamidomethylation	2273	Homo sapiens	Tmito	0.00137493	0.0189599	2.67663	1.42042	1199140	1116950	1228780	804313	554907	273077	416092	409030
P61803	4	4	4	4	232.893	12497	35.4	Dolichyl-diphosphooligosaccharide--protein glycosyltransferase subunit DAD1	DAD1	#N/A	#N/A	Acetylation (Protein N-term)	2756	Homo sapiens	#N/A	0.000361782	0.00977882	2.66915	1.41638	7618800	5390810	5560780	7163570	2473420	2776200	1757070	2671630
O43402	7	7	7	7	283.537	23773	32.86	ER membrane protein complex subunit 8	EMC8	#N/A	#N/A	Carbamidomethylation	2568	Homo sapiens	#N/A	0.00287069	0.0269021	2.66703	1.41524	2684490	1641270	1856450	1387880	762242	780913	445943	845257
P20290	5	5	5	5	253.36	22168	41.75	Transcription factor BTF3	BTF3	#N/A	#N/A	Oxidation (M)	2599	Homo sapiens	#N/A	0.00358964	0.0307997	2.65327	1.40777	2477470	1041090	1599180	1535090	465138	736794	522171	713937
Q9Y2P8	11	11	11	11	333.796	40843	43.43	RNA 3'-terminal phosphate cyclase-like protein	RCL1	#N/A	#N/A	Acetylation (Protein N-term); Carbamidomethylation; Oxidation (M)	1599	Homo sapiens	#N/A	0.00534522	0.0390292	2.64568	1.40364	2138230	2534300	1532930	2279830	554546	1373390	626029	810711
Q5SWX8	4	3	4	3	226.205	51103	7.49	Protein odr-4 homolog	ODR4	#N/A	#N/A	N/A	3204	Homo sapiens	#N/A	0.000175677	0.00712136	2.64485	1.40319	313011	245665	231537	360853	108275	120032	110380	91522.8
Q8TCJ2	17	16	15	14	386.195	93674	15.98	Dolichyl-diphosphooligosaccharide--protein glycosyltransferase subunit STT3B	STT3B	#N/A	#N/A	Carbamidomethylation; Oxidation (M)	986	Homo sapiens	#N/A	0.000106241	0.00520281	2.64082	1.40098	5788610	4962100	4990390	4948980	2216360	2202500	1448900	2062250
Q07065	32	32	32	32	472.139	66022	60.63	Cytoskeleton-associated protein 4	CKAP4	#N/A	#N/A	Carbamidomethylation; Deamidation (NQ); Oxidation (M)	296	Homo sapiens	#N/A	0.00591713	0.0417902	2.63996	1.40052	45100000	29000000	22800000	24700000	11800000	17500000	9667210	7596170
O60264	50	48	33	33	516.715	121905	27.66	SWI/SNF-related matrix-associated actin-dependent regulator of chromatin subfamily A member 5	SMARCA5	#N/A	#N/A	Carbamidomethylation; Deamidation (NQ); Oxidation (M)	128	Homo sapiens	#N/A	0.000154671	0.00652762	2.63969	1.40037	13200000	14500000	13600000	17700000	4916470	6316760	4546650	6720550
P62753	20	20	20	20	407.676	28681	48.59	40S ribosomal protein S6	RPS6	#N/A	#N/A	Carbamidomethylation; Deamidation (NQ); Oxidation (M)	624	Homo sapiens	#N/A	0.00152748	0.0198608	2.6386	1.39977	54200000	82600000	40400000	51500000	17700000	25100000	17800000	24300000
O95219	14	13	14	13	366.186	51909	31.33	Sorting nexin-4	SNX4	#N/A	#N/A	Carbamidomethylation; Oxidation (M)	1351	Homo sapiens	#N/A	0.00679433	0.0446906	2.63784	1.39936	2593780	4001810	2170310	2906460	1857740	891300	724201	1127750
O60568	36	36	36	36	481.389	84785	53.79	Multifunctional procollagen lysine hydroxylase and glycosyltransferase LH3	PLOD3	#N/A	#N/A	Carbamidomethylation; Deamidation (NQ); Oxidation (M)	241	Homo sapiens	#N/A	0.00204288	0.0224952	2.63046	1.39532	38100000	28000000	31800000	21900000	11000000	14900000	7514060	12600000
P61421	18	18	18	18	406.305	40329	54.99	V-type proton ATPase subunit d 1	ATP6V0D1	#N/A	#N/A	Carbamidomethylation; Oxidation (M)	936	Homo sapiens	#N/A	0.000219967	0.00756193	2.62018	1.38966	14600000	17200000	11200000	13200000	5279970	6088920	4204790	5826860
Q9P287	5	5	5	5	251.574	35979	21.97	BRCA2 and CDKN1A-interacting protein	BCCIP	#N/A	#N/A	Carbamidomethylation	2941	Homo sapiens	#N/A	0.006828	0.0446906	2.61906	1.38905	3969200	3592360	2743430	2653450	719159	1170100	1263700	2074500
Q14165	15	15	15	15	376.752	32234	47.95	Malectin	MLEC	#N/A	#N/A	Carbamidomethylation; Oxidation (M)	1150	Homo sapiens	#N/A	0.000332989	0.00937721	2.61897	1.389	12100000	9042660	10100000	8804180	3453830	4322680	2917260	4748330
Q8NBQ5	14	13	14	13	369.776	32936	50.67	Estradiol 17-beta-dehydrogenase 11	HSD17B11	#N/A	#N/A	Carbamidomethylation; Oxidation (M)	1267	Homo sapiens	#N/A	0.00238144	0.0246747	2.61849	1.38874	6139880	3932360	3803720	6131480	1326930	1681470	2201220	2438830
Q13200	54	53	54	53	531.571	100200	63.33	26S proteasome non-ATPase regulatory subunit 2	PSMD2	#N/A	#N/A	Acetylation (Protein N-term); Carbamidomethylation; Deamidation (NQ); Oxidation (M)	83	Homo sapiens	#N/A	0.00720677	0.0457899	2.61732	1.38809	49800000	86200000	31200000	66200000	21300000	25100000	15500000	22800000
Q8TC12	13	12	13	12	359.582	35386	47.17	Retinol dehydrogenase 11	RDH11	#N/A	#N/A	Carbamidomethylation; Oxidation (M)	1467	Homo sapiens	#N/A	0.00121994	0.0176399	2.61687	1.38784	5536210	5630540	4521730	5093320	1565840	2287240	1475270	2897380
O43181	6	6	6	6	259.775	20108	29.14	NADH dehydrogenase [ubiquinone] iron-sulfur protein 4, mitochondrial	NDUFS4	OXPHOS > Complex I > CI subunits | OXPHOS > OXPHOS subunits	MIM	Deamidation (NQ)	2360	Homo sapiens	Tmito	0.000744084	0.0136969	2.61416	1.38635	3401480	2662530	4430570	2502910	1374930	1216900	966647	1329640
O00425	26	25	24	24	447.121	63705	46.11	Insulin-like growth factor 2 mRNA-binding protein 3	IGF2BP3	#N/A	#N/A	Carbamidomethylation; Oxidation (M)	496	Homo sapiens	#N/A	0.000985612	0.0159005	2.60858	1.38326	27900000	31000000	18400000	22400000	7044340	11400000	8795220	10900000
Q9Y6Y8	18	16	16	15	393.539	111076	19.3	SEC23-interacting protein	SEC23IP	#N/A	#N/A	Carbamidomethylation; Deamidation (NQ); Oxidation (M)	967	Homo sapiens	#N/A	0.00153423	0.0198608	2.60689	1.38233	6148630	6158600	4266590	4113260	1544840	2804610	2023810	1641000
P40616	4	4	4	4	227.268	20418	28.18	ADP-ribosylation factor-like protein 1	ARL1	#N/A	#N/A	Oxidation (M)	3194	Homo sapiens	#N/A	0.000146843	0.00629967	2.6059	1.38178	1047370	730984	716101	791921	268923	302656	305628	378496
P04844	24	24	24	24	435.381	69284	45.48	Dolichyl-diphosphooligosaccharide--protein glycosyltransferase subunit 2	RPN2	#N/A	#N/A	Carbamidomethylation; Oxidation (M)	560	Homo sapiens	#N/A	0.00126954	0.0179081	2.6038	1.38062	14000000	11200000	12200000	16100000	4984440	5898930	3393980	6714350
O00232	31	30	31	30	463.354	52904	56.36	26S proteasome non-ATPase regulatory subunit 12	PSMD12	#N/A	#N/A	Carbamidomethylation; Oxidation (M)	265	Homo sapiens	#N/A	0.00178693	0.0212265	2.60371	1.38057	20600000	25900000	15000000	29700000	6486070	9504810	8224720	10200000
Q9P2N4	51	51	51	51	519.526	216491	32.87	A disintegrin and metalloproteinase with thrombospondin motifs 9	ADAMTS9	#N/A	#N/A	Carbamidomethylation; Oxidation (M)	158	Homo sapiens	#N/A	0.00480393	0.0371643	2.60275	1.38004	14600000	7996330	13400000	9513860	4123670	6402950	2820680	4354640
Q16864	3	3	3	3	200.162	13370	35.29	V-type proton ATPase subunit F	ATP6V1F	#N/A	#N/A	N/A	3480	Homo sapiens	#N/A	0.000624262	0.0125603	2.59405	1.37521	597745	656839	709381	391025	224325	220163	190011	256295
Q9UBQ6	6	6	6	6	274.873	37466	23.64	Exostosin-like 2	EXTL2	#N/A	#N/A	N/A	2393	Homo sapiens	#N/A	0.00134487	0.0187984	2.59402	1.37519	2936200	3089320	3107360	1909460	833790	1477740	998167	966498
Q15005	16	16	16	16	383.172	25003	61.5	Signal peptidase complex subunit 2	SPCS2	#N/A	#N/A	Acetylation (Protein N-term); Carbamidomethylation; Oxidation (M)	964	Homo sapiens	#N/A	0.00147943	0.0197072	2.59003	1.37297	13900000	8009950	12400000	7029490	3964970	4062210	3317770	4035710
P42892	9	9	9	9	313.909	87164	13.77	Endothelin-converting enzyme 1	ECE1	#N/A	#N/A	N/A	1996	Homo sapiens	#N/A	0.0025672	0.0255881	2.58737	1.37149	3186980	1821050	2407570	2908500	719811	808180	1335050	1167590
O00567	32	32	32	32	466.696	66050	63.47	Nucleolar protein 56	NOP56	#N/A	#N/A	Carbamidomethylation; Oxidation (M)	343	Homo sapiens	#N/A	0.000515424	0.0113851	2.58689	1.37122	13800000	15700000	9406090	14200000	4414300	5500300	4338670	6134260
O96019	9	9	6	6	324.223	47461	21.91	Actin-like protein 6A	ACTL6A	#N/A	#N/A	Oxidation (M)	1872	Homo sapiens	#N/A	0.0016422	0.0206909	2.5865	1.371	2736830	3776890	1851520	2887880	1128440	1282540	813247	1049230
Q8NBJ5	20	18	20	18	398.304	71636	29.58	Procollagen galactosyltransferase 1	COLGALT1	#N/A	#N/A	Carbamidomethylation; Oxidation (M)	843	Homo sapiens	#N/A	0.000314863	0.00900565	2.58582	1.37062	7429010	7776460	4954750	7783070	2625890	3033780	2823180	2215600
Q9NRX1	8	7	8	7	295.717	27924	38.49	RNA-binding protein PNO1	PNO1	#N/A	#N/A	Carbamidomethylation	2190	Homo sapiens	#N/A	0.00252548	0.0255881	2.585	1.37016	1495370	1520500	922947	1361470	406697	556354	383720	736958
Q9NRX5	5	5	5	5	262.736	50495	12.8	Serine incorporator 1	SERINC1	#N/A	#N/A	Carbamidomethylation	2924	Homo sapiens	#N/A	0.00715894	0.0457098	2.58402	1.36962	1491100	2193230	1000730	1590050	571790	907181	385843	583162
Q8WWY3	8	8	8	8	308.158	55456	18.24	U4/U6 small nuclear ribonucleoprotein Prp31	PRPF31	#N/A	#N/A	Oxidation (M)	2145	Homo sapiens	#N/A	0.001581	0.0202641	2.56109	1.35676	2169240	2598260	1354850	2075680	577404	928890	818720	839005
O15042	15	14	15	14	374.489	118292	14.67	U2 snRNP-associated SURP motif-containing protein	U2SURP	#N/A	#N/A	Carbamidomethylation	1283	Homo sapiens	#N/A	0.000214593	0.00750615	2.56078	1.35658	4233180	5041810	3563450	3986250	1696560	1495030	1339340	2075360
Q6NXR4	5	5	5	5	258.279	56915	13.78	TELO2-interacting protein 2	TTI2	#N/A	#N/A	Carbamidomethylation; Deamidation (NQ)	2812	Homo sapiens	#N/A	2.54519e-06	0.000330302	2.55092	1.35102	622484	616559	624658	690538	253091	226348	240611	283646
O15230	107	106	106	105	613.52	399737	39.32	Laminin subunit alpha-5	LAMA5	#N/A	#N/A	Carbamidomethylation; Deamidation (NQ); Oxidation (M)	14	Homo sapiens	#N/A	0.00375591	0.0316508	2.55024	1.35063	40100000	65800000	37200000	58000000	18000000	29300000	17600000	14500000
Q00839	50	50	49	49	522.544	90584	53.7	Heterogeneous nuclear ribonucleoprotein U	HNRNPU	#N/A	#N/A	Acetylation (Protein N-term); Carbamidomethylation; Deamidation (NQ); Oxidation (M)	72	Homo sapiens	#N/A	0.00194717	0.0221662	2.54936	1.35014	168000000	168000000	113000000	164000000	45800000	61800000	49100000	89100000
Q8IV08	14	14	14	14	370.546	54705	35.1	5'-3' exonuclease PLD3	PLD3	#N/A	#N/A	Carbamidomethylation	1159	Homo sapiens	#N/A	0.000282026	0.0085116	2.53821	1.34381	19000000	16700000	15000000	14900000	5930420	8889070	5477050	5917680
P14314	30	29	30	29	459.669	59425	58.52	Glucosidase 2 subunit beta	PRKCSH	#N/A	#N/A	Carbamidomethylation; Deamidation (NQ); Oxidation (M)	215	Homo sapiens	#N/A	0.00879686	0.0523076	2.5273	1.3376	171000000	114000000	85300000	59000000	37400000	51600000	35300000	35300000
Q9BUN8	3	3	3	3	170.083	28801	13.15	Derlin-1	DERL1	#N/A	#N/A	Acetylation (Protein N-term)	3441	Homo sapiens	#N/A	0.00535664	0.0390292	2.52252	1.33487	651018	1238770	616139	1263900	289934	418556	313652	407510
Q96A65	30	28	30	28	459.834	110498	33.37	Exocyst complex component 4	EXOC4	#N/A	#N/A	Carbamidomethylation; Oxidation (M)	457	Homo sapiens	#N/A	0.00344234	0.0299316	2.5158	1.33102	3507150	6288840	2852430	5127950	1494470	1690050	1494990	2132820
P46379	19	18	19	18	399.617	119409	23.32	Large proline-rich protein BAG6	BAG6	#N/A	#N/A	Carbamidomethylation; Oxidation (M)	864	Homo sapiens	#N/A	0.00125433	0.017839	2.51303	1.32943	7391940	8368130	4738840	6594910	2259340	3603880	2485190	2395330
Q9Y3Q3	5	5	5	5	227.521	24777	17.05	Transmembrane emp24 domain-containing protein 3	TMED3	#N/A	#N/A	Carbamidomethylation	3048	Homo sapiens	#N/A	0.000947778	0.0158707	2.5114	1.32849	1608160	1315670	1401030	1199960	710115	658516	384845	496870
P67812	4	4	4	4	241.401	20625	16.2	Signal peptidase complex catalytic subunit SEC11A	SEC11A	#N/A	#N/A	Oxidation (M)	2671	Homo sapiens	#N/A	0.000305114	0.00889801	2.50807	1.32658	8771090	5690600	7064940	6783460	2726350	2938700	2234950	3376030
Q6ZMG9	4	3	4	3	173.869	44890	6.51	Ceramide synthase 6	CERS6	#N/A	#N/A	N/A	3344	Homo sapiens	#N/A	0.00126909	0.0179081	2.50414	1.32432	524191	554936	382909	733604	181732	255142	183483	244257
O43169	8	8	8	8	309.227	16695	63.33	Cytochrome b5 type B	CYB5B	Metabolism > Metals and cofactors > Heme-containing proteins | Metabolism > Detoxification > Xenobiotic metabolism | Metabolism > Detoxification > Amidoxime reducing complex | Metabolism > Electron carriers > Cytochromes	MOM	N/A	2268	Homo sapiens	Tmito	0.00108867	0.0164281	2.50412	1.32431	5241080	7221280	8931780	5760850	1967270	2866440	3083530	2848270
Q969N2	11	10	11	10	327.538	65700	19.2	GPI transamidase component PIG-T	PIGT	#N/A	#N/A	Carbamidomethylation	1705	Homo sapiens	#N/A	0.000356642	0.00969282	2.48992	1.3161	4489300	5163350	3011910	4489370	1666850	1925900	1515090	1676600
P61927	3	3	3	3	143.889	11078	22.68	60S ribosomal protein L37	RPL37	#N/A	#N/A	Carbamidomethylation	3488	Homo sapiens	#N/A	0.00526632	0.0389303	2.48987	1.31607	799327	823070	554261	675110	298057	382242	161738	347612
Q9BTY7	3	3	3	3	175.251	42129	7.95	Protein HGH1 homolog	HGH1	#N/A	#N/A	N/A	3746	Homo sapiens	#N/A	0.00723354	0.045871	2.48469	1.31306	459144	443962	446787	338643	191276	215582	88613.2	221452
Q15738	16	16	16	16	383.752	41900	53.62	Sterol-4-alpha-carboxylate 3-dehydrogenase, decarboxylating	NSDHL	#N/A	#N/A	Carbamidomethylation; Deamidation (NQ); Oxidation (M)	1107	Homo sapiens	#N/A	0.000732928	0.0136367	2.48243	1.31176	8319310	7138910	6958500	5820610	2423530	4009560	2803380	2325230
Q9BV86	7	7	7	7	283.417	25387	31.84	N-terminal Xaa-Pro-Lys N-methyltransferase 1	NTMT1	#N/A	#N/A	Acetylation (Protein N-term); Carbamidomethylation	2411	Homo sapiens	#N/A	0.00140704	0.0191202	2.48016	1.31043	1954200	1672960	1736340	1966630	492340	729829	774266	1060520
Q99574	3	3	3	3	189.541	46427	7.8	Neuroserpin	SERPINI1	#N/A	#N/A	N/A	3451	Homo sapiens	#N/A	0.000737393	0.0136707	2.47556	1.30775	378910	281649	277733	233706	93010.6	117084	152780	110854
P46776	10	10	10	10	328.902	16561	43.24	60S ribosomal protein L27a	RPL27A	#N/A	#N/A	Carbamidomethylation	1924	Homo sapiens	#N/A	0.00740511	0.0465999	2.47428	1.30701	21400000	35500000	16600000	35700000	9033450	11800000	8049310	14000000
P21246	3	3	3	3	211.489	18942	30.36	Pleiotrophin	PTN	#N/A	#N/A	Carbamidomethylation	3448	Homo sapiens	#N/A	0.00493087	0.0374457	2.47358	1.3066	1082260	793348	1117480	800093	447420	593216	279602	276311
Q9UBM7	9	9	9	9	307.866	54489	19.58	7-dehydrocholesterol reductase	DHCR7	#N/A	#N/A	Carbamidomethylation	2041	Homo sapiens	#N/A	0.0096839	0.054879	2.46574	1.30202	2675390	3233720	2688930	4769830	905372	1375110	1065790	2262270
Q6UXD5	8	8	8	8	298.362	97560	9.78	Seizure 6-like protein 2	SEZ6L2	#N/A	#N/A	Carbamidomethylation	2243	Homo sapiens	#N/A	0.00270474	0.0262436	2.45284	1.29446	2442710	2283170	1416080	1517850	823943	997438	567929	709528
Q15904	11	11	11	11	331.238	52026	26.38	V-type proton ATPase subunit S1	ATP6AP1	#N/A	#N/A	N/A	1687	Homo sapiens	#N/A	0.00950473	0.0542187	2.45201	1.29396	8875080	7496470	6909900	4907760	4487220	3487670	1953440	2041660
P18621	16	16	15	15	385.958	21397	62.5	60S ribosomal protein L17	RPL17	#N/A	#N/A	Carbamidomethylation; Oxidation (M)	968	Homo sapiens	#N/A	0.0052947	0.0389303	2.4492	1.29231	29100000	47700000	26300000	46300000	11100000	17400000	12100000	20100000
P33993	42	41	42	41	501.895	81308	56.47	DNA replication licensing factor MCM7	MCM7	#N/A	#N/A	Acetylation (Protein N-term); Carbamidomethylation; Deamidation (NQ); Oxidation (M)	173	Homo sapiens	#N/A	0.000436237	0.0108773	2.44846	1.29188	43400000	52000000	39900000	41600000	14200000	20500000	15500000	23100000
P30626	7	7	7	7	294.06	21676	40.91	Sorcin	SRI	#N/A	#N/A	Carbamidomethylation	2207	Homo sapiens	#N/A	0.00177803	0.0212178	2.44555	1.29016	4190750	4704980	3835960	2972850	1100030	1725310	2113940	1566830
P07814	79	79	77	77	573.745	170591	57.47	Bifunctional glutamate/proline--tRNA ligase	EPRS1	#N/A	#N/A	Carbamidomethylation; Deamidation (NQ); Oxidation (M)	31	Homo sapiens	#N/A	0.00911785	0.0532405	2.44274	1.2885	30800000	61200000	26300000	47200000	12100000	21400000	13500000	18800000
Q8NFQ8	8	8	7	7	311.547	51263	20.85	Torsin-1A-interacting protein 2	TOR1AIP2	#N/A	#N/A	Carbamidomethylation	2279	Homo sapiens	#N/A	0.00386297	0.0323431	2.43686	1.28502	3735280	3990740	3281340	2778160	1704110	1334470	866971	1954580
O94925	17	16	17	16	398.422	73461	32.44	Glutaminase kidney isoform, mitochondrial	GLS	Metabolism > Amino acid metabolism > Glutamate metabolism	MIM	Carbamidomethylation; Oxidation (M)	853	Homo sapiens	Tmito	0.00112187	0.0166592	2.43434	1.28353	10800000	10100000	7410660	8565710	3120760	5343140	3116040	3794730
Q08J23	41	41	41	41	490.837	86471	63.23	RNA cytosine C(5)-methyltransferase NSUN2	NSUN2	Mitochondrial central dogma > mtRNA metabolism > mt-tRNA modifications	Matrix	Carbamidomethylation; Deamidation (NQ); Oxidation (M)	195	Homo sapiens	Tnon_mito	0.000657106	0.0130192	2.43228	1.28231	16300000	22100000	12600000	17900000	5751150	6755150	8154670	7327420
Q9Y265	35	35	35	35	476.07	50228	68.86	RuvB-like 1	RUVBL1	#N/A	#N/A	Carbamidomethylation; Oxidation (M)	251	Homo sapiens	#N/A	0.000521943	0.0113851	2.42946	1.28063	105000000	126000000	72200000	96100000	40600000	46700000	34400000	40400000
Q13895	14	14	14	14	367.907	49601	35.24	Bystin	BYSL	#N/A	#N/A	Carbamidomethylation; Oxidation (M)	1381	Homo sapiens	#N/A	0.00258616	0.0255881	2.4273	1.27935	4079400	6108990	4362570	4260970	1301140	2596790	1733170	2278870
P22087	17	17	14	14	394.956	33784	42.99	rRNA 2'-O-methyltransferase fibrillarin	FBL	#N/A	#N/A	Carbamidomethylation; Deamidation (NQ); Oxidation (M)	998	Homo sapiens	#N/A	0.00671392	0.0446515	2.4244	1.27763	12100000	14300000	8389870	13500000	3193380	5410880	4320880	7598090
P38571	4	4	4	4	214.654	45419	13.03	Lysosomal acid lipase/cholesteryl ester hydrolase	LIPA	#N/A	#N/A	N/A	3240	Homo sapiens	#N/A	0.00884755	0.0524887	2.42394	1.27736	1043620	1034000	1150280	725196	305259	716069	416068	286711
Q7Z4S6	45	43	45	43	505.408	187179	32.68	Kinesin-like protein KIF21A	KIF21A	#N/A	#N/A	Carbamidomethylation; Deamidation (NQ); Oxidation (M)	139	Homo sapiens	#N/A	0.00078602	0.0140698	2.42228	1.27636	19200000	25700000	13600000	19700000	7780170	9242880	7282370	7332890
Q9BVC6	4	4	4	4	234.152	26210	13.17	Transmembrane protein 109	TMEM109	#N/A	#N/A	N/A	3333	Homo sapiens	#N/A	0.00277786	0.0265723	2.42221	1.27632	5799270	3291990	4903630	2968120	1811530	1510150	1420280	2077520
Q8NBL1	10	10	10	10	333.683	46189	23.72	Protein O-glucosyltransferase 1	POGLUT1	#N/A	#N/A	Oxidation (M)	1720	Homo sapiens	#N/A	0.00278837	0.0266074	2.41903	1.27443	4382530	2776040	2979190	2566620	1233190	1904410	1020970	1133020
P55083	10	10	10	10	330.412	28648	36.47	Microfibril-associated glycoprotein 4	MFAP4	#N/A	#N/A	Carbamidomethylation; Oxidation (M)	1784	Homo sapiens	#N/A	0.00290423	0.0270794	2.40998	1.26902	24300000	22400000	18800000	12400000	8358220	10100000	6266210	7111110
Q9BQ39	19	18	16	15	402.785	82565	27.14	ATP-dependent RNA helicase DDX50	DDX50	#N/A	#N/A	Carbamidomethylation; Deamidation (NQ); Oxidation (M)	777	Homo sapiens	#N/A	0.00489086	0.0373688	2.40442	1.26569	1967040	2875410	2640330	3131290	661193	1126030	1482820	1267330
Q32P28	21	21	21	21	405.607	83394	34.38	Prolyl 3-hydroxylase 1	P3H1	#N/A	#N/A	Carbamidomethylation; Oxidation (M)	792	Homo sapiens	#N/A	0.000967465	0.0158708	2.39812	1.26191	9126400	7956700	8055240	9250710	2832100	3508730	5333410	3087000
P35250	12	12	12	12	352.702	39157	42.94	Replication factor C subunit 2	RFC2	#N/A	#N/A	Carbamidomethylation; Oxidation (M)	1418	Homo sapiens	#N/A	0.00115083	0.0168755	2.39667	1.26103	6999220	7037450	4401650	6323450	2174830	2112070	3229580	2801030
O94906	38	36	38	36	476.235	106925	40.81	Pre-mRNA-processing factor 6	PRPF6	#N/A	#N/A	Carbamidomethylation; Oxidation (M)	270	Homo sapiens	#N/A	0.000215427	0.00750615	2.39635	1.26084	16900000	17500000	11800000	14300000	5476530	6909420	5713420	6999950
Q6P1X6	4	4	4	4	230.435	23889	25.46	UPF0598 protein C8orf82	C8orf82	0	Matrix	Carbamidomethylation; Oxidation (M)	2841	Homo sapiens	Tmito	0.000487118	0.0113391	2.39571	1.26045	1250160	1131000	1022440	936392	449447	474434	335079	575160
Q9NR30	39	39	36	36	489.195	87344	45.85	Nucleolar RNA helicase 2	DDX21	#N/A	#N/A	Carbamidomethylation	268	Homo sapiens	#N/A	0.00208451	0.0226825	2.39544	1.26029	19300000	24600000	16800000	29000000	7752790	9912890	7431870	12300000
Q5UCC4	3	3	3	3	198.823	27347	12.98	ER membrane protein complex subunit 10	EMC10	#N/A	#N/A	N/A	3557	Homo sapiens	#N/A	0.000974436	0.0159005	2.39399	1.25942	3815920	4663090	2666400	3887180	1232850	1789410	1457530	1746260
Q6PK18	7	7	7	7	274.637	35646	26.96	2-oxoglutarate and iron-dependent oxygenase domain-containing protein 3	OGFOD3	#N/A	#N/A	Carbamidomethylation	2374	Homo sapiens	#N/A	0.00905633	0.0531803	2.39202	1.25823	1919490	1175370	1457720	1536340	415285	754945	481420	1022530
Q15024	6	5	6	5	255.721	31821	25.43	Exosome complex component RRP42	EXOSC7	#N/A	#N/A	Carbamidomethylation	2645	Homo sapiens	#N/A	0.00488963	0.0373688	2.38059	1.25132	1536360	1943160	872979	1773250	566906	735563	501137	688569
Q5J8M3	5	4	5	4	258.067	20087	26.23	ER membrane protein complex subunit 4	EMC4	#N/A	#N/A	Acetylation (Protein N-term); Carbamidomethylation	2853	Homo sapiens	#N/A	0.00398336	0.0332438	2.37984	1.25087	1633040	1156330	1215770	963889	329616	634918	507901	649022
Q15165	7	7	7	7	291.449	39381	21.75	Serum paraoxonase/arylesterase 2	PON2	#N/A	#N/A	Carbamidomethylation	2387	Homo sapiens	#N/A	0.00256945	0.0255881	2.37717	1.24924	5846880	3572230	5267060	3238910	1513560	1943340	1616530	2346720
P06400	14	14	14	14	358.871	106159	15.52	Retinoblastoma-associated protein	RB1	#N/A	#N/A	Carbamidomethylation	1373	Homo sapiens	#N/A	0.00162223	0.0205391	2.37164	1.24588	2653990	3441570	2132800	3820020	957061	1454140	1292330	1307860
Q96KP1	26	26	26	26	429.201	104066	29.22	Exocyst complex component 2	EXOC2	#N/A	#N/A	Carbamidomethylation	583	Homo sapiens	#N/A	0.000955407	0.0158708	2.37151	1.24581	3541650	5596420	3024450	4624810	1700080	1561470	1713330	1927130
O43264	18	18	18	18	395.521	88829	29.91	Centromere/kinetochore protein zw10 homolog	ZW10	#N/A	#N/A	Acetylation (Protein N-term); Carbamidomethylation	1000	Homo sapiens	#N/A	0.00192512	0.0219633	2.37093	1.24546	2597250	2825610	1575010	2752160	876889	1132690	1202860	842621
Q9Y320	12	10	12	10	323.357	34038	37.5	Thioredoxin-related transmembrane protein 2	TMX2	#N/A	#N/A	Carbamidomethylation	1587	Homo sapiens	#N/A	0.000531938	0.0113851	2.3705	1.24519	2271470	2093600	1479140	2017460	782736	920245	651282	958002
P40937	17	17	17	17	386.254	38497	52.35	Replication factor C subunit 5	RFC5	#N/A	#N/A	Carbamidomethylation; Oxidation (M)	1018	Homo sapiens	#N/A	0.00163001	0.0205873	2.36855	1.244	6226190	7151470	4494690	7226250	1976830	2935430	2387660	3316560
O75477	11	11	8	8	331.73	39171	22.13	Erlin-1	ERLIN1	#N/A	#N/A	Carbamidomethylation; Oxidation (M)	1629	Homo sapiens	#N/A	0.00187999	0.0215907	2.36329	1.2408	3068300	1968300	2130040	1624230	783888	1081970	754830	1046250
O95816	7	7	7	7	285.516	23772	33.18	BAG family molecular chaperone regulator 2	BAG2	#N/A	#N/A	Carbamidomethylation; Deamidation (NQ)	2234	Homo sapiens	#N/A	0.00185683	0.0214673	2.36242	1.24027	1553120	1910270	1158610	1472640	824154	695134	452697	626636
Q9BXS5	4	4	4	4	228.174	48587	10.17	AP-1 complex subunit mu-1	AP1M1	#N/A	#N/A	N/A	3151	Homo sapiens	#N/A	0.00839587	0.0504068	2.36172	1.23984	1528440	2193430	1536260	2667900	546554	845389	749698	1275010
Q9UHG3	17	17	17	17	397.479	56640	36.44	Prenylcysteine oxidase 1	PCYOX1	#N/A	#N/A	Carbamidomethylation; Oxidation (M)	959	Homo sapiens	#N/A	0.000686479	0.0131747	2.34559	1.22995	15700000	12700000	11800000	12300000	5794270	7111510	4044830	5736120
Q5JPH6	8	8	8	8	286.836	58689	19.5	Probable glutamate--tRNA ligase, mitochondrial	EARS2	Mitochondrial central dogma > Translation > mt-tRNA synthetases	Matrix	N/A	2217	Homo sapiens	Tmito	0.00134697	0.0187984	2.34546	1.22987	2113660	2156820	2363740	1733820	973500	1241200	666887	766146
Q9UM00	4	4	4	4	234.911	27079	20.08	Calcium load-activated calcium channel	TMCO1	#N/A	#N/A	Deamidation (NQ)	2968	Homo sapiens	#N/A	0.000669353	0.0131424	2.34256	1.22808	2427680	2803480	2620930	2564840	761776	1347760	1166080	1269040
Q2NL82	20	20	20	20	418.764	91810	26.62	Pre-rRNA-processing protein TSR1 homolog	TSR1	#N/A	#N/A	Carbamidomethylation; Oxidation (M)	847	Homo sapiens	#N/A	0.00300762	0.0275258	2.34243	1.22801	6565990	9928760	5358720	8970350	2703570	3212500	2782360	4307290
P00387	14	14	14	14	372.317	34235	57.81	NADH-cytochrome b5 reductase 3	CYB5R3	Metabolism > Detoxification > Xenobiotic metabolism | Metabolism > Detoxification > Amidoxime reducing complex | Metabolism > Lipid metabolism	MOM	Carbamidomethylation; Oxidation (M)	1094	Homo sapiens	Tmito	5.47763e-05	0.00323118	2.34053	1.22684	9515900	9094970	8421300	7916110	3207920	4158330	3359040	4290690
P48681	34	32	34	32	456.744	177439	24	Nestin	NES	#N/A	#N/A	Carbamidomethylation	337	Homo sapiens	#N/A	0.00703643	0.0452055	2.33991	1.22645	13200000	6556820	8938980	6730500	2768260	3027960	4923480	4209010
Q92643	6	6	6	6	260.816	45252	15.19	GPI-anchor transamidase	PIGK	#N/A	#N/A	Carbamidomethylation	2753	Homo sapiens	#N/A	6.51742e-06	0.000699993	2.33935	1.22611	1444050	1406900	1253440	1473410	582479	679558	552349	573024
P04439	7	7	4	4	296.292	40841	15.62	HLA class I histocompatibility antigen, A alpha chain	HLA-A	#N/A	#N/A	N/A	2347	Homo sapiens	#N/A	0.00972599	0.0550566	2.33851	1.22559	1160600	860928	704185	593702	205335	418837	366487	443181
Q9NPA0	5	5	5	5	257.466	26471	28.93	ER membrane protein complex subunit 7	EMC7	#N/A	#N/A	N/A	2898	Homo sapiens	#N/A	0.000592184	0.0121641	2.33752	1.22498	4708120	3121630	3682710	3264110	1470370	1820780	1239580	1783120
Q07955	21	21	20	20	413.98	27745	56.85	Serine/arginine-rich splicing factor 1	SRSF1	#N/A	#N/A	Carbamidomethylation; Oxidation (M)	772	Homo sapiens	#N/A	0.000987363	0.0159005	2.33407	1.22285	108000000	75600000	62900000	60100000	28600000	36300000	31700000	31600000
P16278	14	14	14	14	369.849	76075	28.06	Beta-galactosidase	GLB1	#N/A	#N/A	Carbamidomethylation	1369	Homo sapiens	#N/A	0.00598845	0.0420082	2.33068	1.22075	5298460	5839180	4393470	5154130	1615030	2444920	3671960	1637530
P56199	29	27	29	27	450.021	130848	22.99	Integrin alpha-1	ITGA1	#N/A	#N/A	Carbamidomethylation; Deamidation (NQ); Oxidation (M)	393	Homo sapiens	#N/A	0.00438442	0.0349608	2.32123	1.21489	20400000	25500000	17000000	20400000	10300000	13400000	6557520	6865820
P49755	11	11	11	11	348.562	24976	46.12	Transmembrane emp24 domain-containing protein 10	TMED10	#N/A	#N/A	Oxidation (M)	1338	Homo sapiens	#N/A	0.000959821	0.0158708	2.32102	1.21476	22700000	14100000	19800000	13000000	6462310	7902410	7505950	7406050
Q71RC2	3	3	3	3	188.92	80596	4.01	La-related protein 4	LARP4	#N/A	#N/A	Carbamidomethylation	3764	Homo sapiens	#N/A	0.000230817	0.00788272	2.31978	1.21399	501467	494156	469266	386777	159516	208125	190917	245033
Q9UL33	3	3	3	3	135.656	16146	22.14	Trafficking protein particle complex subunit 2-like protein	TRAPPC2L	#N/A	#N/A	N/A	3465	Homo sapiens	#N/A	0.00164689	0.0206997	2.31946	1.21379	471642	583932	460929	479238	140711	258343	219905	262937
Q9UKM9	19	17	17	17	399.233	32463	57.84	RNA-binding protein Raly	RALY	#N/A	#N/A	Oxidation (M)	893	Homo sapiens	#N/A	0.00079208	0.0141295	2.31892	1.21346	23300000	23300000	15100000	20700000	7122090	9713100	8079040	10500000
Q15363	4	4	4	4	235.177	22761	19.9	Transmembrane emp24 domain-containing protein 2	TMED2	#N/A	#N/A	Carbamidomethylation; Oxidation (M)	2720	Homo sapiens	#N/A	0.00100193	0.0159541	2.31646	1.21192	5586060	3518130	3729970	3050280	1646850	1767820	1437920	1854980
Q9NYU2	63	62	63	62	545.978	177190	47.91	UDP-glucose:glycoprotein glucosyltransferase 1	UGGT1	#N/A	#N/A	Carbamidomethylation; Deamidation (NQ); Oxidation (M)	68	Homo sapiens	#N/A	0.00100078	0.0159541	2.31073	1.20835	24400000	28700000	24700000	33500000	16100000	12800000	10600000	9304100
P04843	35	35	35	35	481.317	68569	63.1	Dolichyl-diphosphooligosaccharide--protein glycosyltransferase subunit 1	RPN1	#N/A	#N/A	Carbamidomethylation; Deamidation (NQ); Oxidation (M)	320	Homo sapiens	#N/A	1.38506e-05	0.00119831	2.30991	1.20784	83300000	83100000	68700000	86200000	32500000	38400000	35500000	32500000
Q96GC9	3	3	3	3	183.615	46238	13.05	Vacuole membrane protein 1	VMP1	#N/A	#N/A	N/A	3864	Homo sapiens	#N/A	0.00156661	0.0201793	2.30933	1.20748	696598	493588	420677	768629	216648	239788	271930	276711
P78357	19	18	19	18	399.664	156267	15.1	Contactin-associated protein 1	CNTNAP1	#N/A	#N/A	Carbamidomethylation; Deamidation (NQ)	867	Homo sapiens	#N/A	0.00270469	0.0262436	2.30858	1.20701	6569220	3607040	3643330	3124570	1624850	1639720	1954950	1823290
P57737	19	18	19	18	409.386	100605	32.22	Coronin-7	CORO7	#N/A	#N/A	Carbamidomethylation; Deamidation (NQ)	785	Homo sapiens	#N/A	0.00469313	0.0366371	2.30515	1.20486	2729160	4287160	2918740	4995260	1141720	1468310	1862930	1934540
P23284	20	20	19	19	413.191	23743	64.35	Peptidyl-prolyl cis-trans isomerase B	PPIB	#N/A	#N/A	Carbamidomethylation; Deamidation (NQ); Oxidation (M)	572	Homo sapiens	#N/A	0.00228141	0.0240707	2.29545	1.19878	229000000	137000000	178000000	111000000	69600000	71600000	60300000	74300000
P07437	34	34	6	6	483.88	49671	17.12	Tubulin beta chain	TUBB	#N/A	#N/A	Deamidation (NQ); Oxidation (M)	35	Homo sapiens	#N/A	0.00220753	0.0234863	2.29166	1.19639	223000000	337000000	168000000	260000000	94600000	125000000	91500000	110000000
Q9UGP8	27	25	27	25	445.11	87997	37.5	Translocation protein SEC63 homolog	SEC63	#N/A	#N/A	Carbamidomethylation; Oxidation (M)	497	Homo sapiens	#N/A	0.000714443	0.0134372	2.28739	1.1937	15800000	11000000	9425640	10300000	4646380	5434660	5658820	4313440
P48556	12	12	12	12	336.845	39612	31.14	26S proteasome non-ATPase regulatory subunit 8	PSMD8	#N/A	#N/A	Carbamidomethylation; Oxidation (M)	1478	Homo sapiens	#N/A	0.000891226	0.0153191	2.28261	1.19068	16400000	23700000	13800000	19000000	8817220	6998430	6821280	8918650
P05388	20	20	20	20	413.428	34274	67.82	60S acidic ribosomal protein P0	RPLP0	#N/A	#N/A	Carbamidomethylation; Oxidation (M)	776	Homo sapiens	#N/A	0.000690333	0.0131747	2.28173	1.19013	58200000	60400000	41900000	52400000	22700000	29900000	18400000	22800000
Q9H5Q4	13	13	13	13	343.426	45349	29.29	Dimethyladenosine transferase 2, mitochondrial	TFB2M	Mitochondrial central dogma > mtDNA maintenance > mtDNA replication | Mitochondrial central dogma > mtRNA metabolism > Transcription	Matrix	Carbamidomethylation; Oxidation (M)	1442	Homo sapiens	Tmito	3.60499e-05	0.00246231	2.27522	1.18601	3153510	3349080	2643200	3508690	1365420	1379300	1548240	1253540
Q96JJ7	11	11	11	11	335.926	51872	27.97	Protein disulfide-isomerase TMX3	TMX3	#N/A	#N/A	Oxidation (M)	1541	Homo sapiens	#N/A	0.00529048	0.0389303	2.2741	1.18529	6177020	4752360	4461020	4341950	1945560	2867530	1365260	2791280
Q9BRR6	13	12	13	12	355.736	54089	37.63	ADP-dependent glucokinase	ADPGK	#N/A	#N/A	Carbamidomethylation; Oxidation (M)	1486	Homo sapiens	#N/A	0.000778202	0.0139829	2.27105	1.18336	2252380	2284200	2259920	2286750	677951	1083450	1200190	1133770
P43686	32	32	31	31	466.936	47366	69.62	26S proteasome regulatory subunit 6B	PSMC4	#N/A	#N/A	Acetylation (Protein N-term); Carbamidomethylation; Deamidation (NQ); Oxidation (M)	257	Homo sapiens	#N/A	0.00039477	0.0104454	2.26554	1.17986	28900000	40600000	23700000	30600000	13000000	14300000	12500000	13900000
Q96AG4	15	15	15	15	380.654	34930	50.81	Leucine-rich repeat-containing protein 59	LRRC59	#N/A	#N/A	Carbamidomethylation; Deamidation (NQ)	1082	Homo sapiens	#N/A	0.00936004	0.0537833	2.26323	1.17838	29800000	18500000	20900000	14600000	6630070	13200000	10100000	7253730
O00231	30	30	30	30	460.859	47464	71.8	26S proteasome non-ATPase regulatory subunit 11	PSMD11	#N/A	#N/A	Acetylation (Protein N-term); Carbamidomethylation; Deamidation (NQ); Oxidation (M)	358	Homo sapiens	#N/A	0.00135172	0.0188118	2.26029	1.17651	40600000	57600000	29600000	41200000	16000000	20200000	17700000	19100000
Q9Y5X1	8	8	8	8	301.292	66592	19.16	Sorting nexin-9	SNX9	#N/A	#N/A	Carbamidomethylation	2185	Homo sapiens	#N/A	0.00314128	0.0282654	2.25686	1.17432	975600	1607910	881280	1494650	619550	591167	501472	433643
Q7Z2Z2	16	15	16	15	377.602	125430	15.89	Elongation factor-like GTPase 1	EFL1	#N/A	#N/A	Carbamidomethylation; Deamidation (NQ)	1141	Homo sapiens	#N/A	0.00839951	0.0504068	2.25476	1.17297	1072260	2189090	1157220	1836290	483419	661211	703897	857728
Q01081	10	10	5	5	340.281	27872	32.08	Splicing factor U2AF 35 kDa subunit	U2AF1	#N/A	#N/A	Carbamidomethylation; Deamidation (NQ); Oxidation (M)	1087	Homo sapiens	#N/A	0.00241749	0.0248007	2.24581	1.16723	9492500	12500000	7949250	9913810	3148810	5706130	4024110	5084050
Q9H444	7	7	7	7	285.62	24950	38.84	Charged multivesicular body protein 4b	CHMP4B	#N/A	#N/A	N/A	2340	Homo sapiens	#N/A	0.00843893	0.0505849	2.23571	1.16073	3292180	2662580	1647700	1698850	1092670	1219550	702010	1049850
O00264	10	10	8	8	335.112	21671	42.05	Membrane-associated progesterone receptor component 1	PGRMC1	#N/A	#N/A	Oxidation (M)	1690	Homo sapiens	#N/A	0.00103297	0.0160543	2.23212	1.15841	5740460	3808180	4095090	3444500	1492940	2048260	2098780	1935490
Q13155	13	13	13	13	361.821	35349	45.94	Aminoacyl tRNA synthase complex-interacting multifunctional protein 2	AIMP2	#N/A	#N/A	Carbamidomethylation; Oxidation (M)	1296	Homo sapiens	#N/A	0.00659807	0.0444236	2.23147	1.158	6969400	11900000	5121740	8943500	2780810	4070090	3721420	3637590
P26373	17	17	17	17	384.887	24261	56.87	60S ribosomal protein L13	RPL13	#N/A	#N/A	Deamidation (NQ); Oxidation (M)	907	Homo sapiens	#N/A	0.00165781	0.0207867	2.22633	1.15467	58500000	83400000	53000000	77500000	23300000	33200000	28500000	37000000
Q15067	26	24	26	24	443.661	74424	50.76	Peroxisomal acyl-coenzyme A oxidase 1	ACOX1	#N/A	#N/A	Carbamidomethylation; Oxidation (M)	432	Homo sapiens	#N/A	7.07054e-06	0.000734064	2.22627	1.15463	9195650	8515680	7911310	8037410	3996320	3711880	4073160	3354800
P17844	50	48	41	39	510.411	69148	51.95	Probable ATP-dependent RNA helicase DDX5	DDX5	#N/A	#N/A	Acetylation (Protein N-term); Carbamidomethylation; Deamidation (NQ); Oxidation (M)	115	Homo sapiens	#N/A	0.00248869	0.0253146	2.22021	1.15069	64300000	55800000	45500000	40100000	16000000	25500000	24100000	27400000
Q05048	7	6	7	6	285.086	48358	18.79	Cleavage stimulation factor subunit 1	CSTF1	#N/A	#N/A	Carbamidomethylation; Deamidation (NQ)	2134	Homo sapiens	#N/A	0.0085312	0.0510201	2.21885	1.14981	767081	1417420	1269910	1421140	571984	461858	394721	776349
P30050	8	8	8	8	309.598	17819	63.64	60S ribosomal protein L12	RPL12	#N/A	#N/A	Carbamidomethylation; Deamidation (NQ)	2098	Homo sapiens	#N/A	0.000310167	0.00894487	2.2172	1.14874	46200000	50900000	40100000	41000000	18800000	22300000	15900000	24000000
Q9HCM3	6	6	6	6	274.398	210755	3.85	UPF0606 protein KIAA1549	KIAA1549	#N/A	#N/A	N/A	2582	Homo sapiens	#N/A	0.00775405	0.0479182	2.2157	1.14777	672929	612464	491503	678057	263299	378878	347829	164241
Q1KMD3	36	35	36	35	481.483	85105	38.55	Heterogeneous nuclear ribonucleoprotein U-like protein 2	HNRNPUL2	#N/A	#N/A	Carbamidomethylation; Deamidation (NQ); Oxidation (M)	269	Homo sapiens	#N/A	0.00266416	0.0260445	2.21145	1.14499	21800000	27600000	14800000	21500000	7674990	10800000	8397640	11500000
Q92542	9	9	9	9	326.115	78411	20.87	Nicastrin	NCSTN	#N/A	#N/A	Carbamidomethylation	1908	Homo sapiens	#N/A	0.00924498	0.0534911	2.21069	1.14449	11200000	11200000	11500000	9145430	5858400	7629290	4105790	3010040
O00422	3	3	3	3	169.578	17561	15.69	Histone deacetylase complex subunit SAP18	SAP18	#N/A	#N/A	N/A	3849	Homo sapiens	#N/A	0.00904276	0.0531608	2.21047	1.14435	3292660	2760030	1638370	2145530	930304	772595	1307310	1424010
Q8TCT9	8	8	8	8	308.937	41488	23.08	Minor histocompatibility antigen H13	HM13	#N/A	#N/A	Oxidation (M)	2034	Homo sapiens	#N/A	0.00203488	0.0224952	2.21032	1.14425	6928510	5314760	3792630	5939620	2419420	2531320	1946360	2915560
Q8N163	37	36	37	36	479.94	102902	49.3	Cell cycle and apoptosis regulator protein 2	CCAR2	#N/A	#N/A	Carbamidomethylation; Deamidation (NQ); Oxidation (M)	280	Homo sapiens	#N/A	0.000778472	0.0139829	2.21028	1.14423	19700000	21500000	14100000	15500000	7468610	7890640	6719430	9794540
O95347	63	63	63	63	545.254	135656	51.38	Structural maintenance of chromosomes protein 2	SMC2	#N/A	#N/A	Carbamidomethylation; Deamidation (NQ); Oxidation (M)	77	Homo sapiens	#N/A	0.000775947	0.0139829	2.20901	1.1434	30600000	39300000	24000000	31500000	13300000	15700000	11500000	15900000
Q13242	11	11	10	10	346.529	25542	41.18	Serine/arginine-rich splicing factor 9	SRSF9	#N/A	#N/A	Carbamidomethylation	1741	Homo sapiens	#N/A	0.00287108	0.0269021	2.20764	1.1425	9970180	8759360	6596860	5804470	2641420	3204740	4194700	3964920
Q9H7D7	16	16	16	16	384.509	72124	28.44	WD repeat-containing protein 26	WDR26	#N/A	#N/A	Carbamidomethylation	1120	Homo sapiens	#N/A	0.00332488	0.029277	2.20656	1.1418	2738960	4148850	2625360	3189740	1995370	1082540	1236290	1503170
Q13445	6	6	6	6	279.813	25206	22.03	Transmembrane emp24 domain-containing protein 1	TMED1	#N/A	#N/A	Carbamidomethylation; Oxidation (M)	2345	Homo sapiens	#N/A	0.00401618	0.0334102	2.2064	1.1417	2594540	1534080	1907220	1230880	870818	921525	725454	677241
P49419	27	26	27	26	445.082	58487	52.69	Alpha-aminoadipic semialdehyde dehydrogenase	ALDH7A1	Metabolism > Amino acid metabolism > Lysine metabolism | Metabolism > Amino acid metabolism > Glycine metabolism | Metabolism > Vitamin metabolism > Choline and betaine metabolism | Metabolism > Vitamin metabolism > Folate and 1-C metabolism | Metabolism > Detoxification > ROS and glutathione metabolism	Matrix	Carbamidomethylation; Oxidation (M)	481	Homo sapiens	Tmito	0.00181909	0.0213158	2.20616	1.14154	16000000	15700000	9668450	11700000	6725150	6786600	4727120	5559810
P46977	20	20	18	18	406.621	80530	23.4	Dolichyl-diphosphooligosaccharide--protein glycosyltransferase subunit STT3A	STT3A	#N/A	#N/A	Carbamidomethylation; Oxidation (M)	755	Homo sapiens	#N/A	0.000334191	0.00937721	2.20353	1.13982	19500000	16300000	13900000	18600000	7289270	8859680	6334910	8519840
Q8WXF7	11	11	10	10	336.28	63544	19.53	Atlastin-1	ATL1	#N/A	#N/A	N/A	1707	Homo sapiens	#N/A	0.00411633	0.0339172	2.19281	1.13278	1494460	1737110	1053140	1459850	617563	946886	486501	606784
P10619	7	6	7	6	280.45	54466	13.33	Lysosomal protective protein	CTSA	#N/A	#N/A	Carbamidomethylation	2172	Homo sapiens	#N/A	0.00293958	0.0272488	2.18263	1.12607	1707720	1399100	1625250	1516450	1076870	734029	511619	641611
Q15269	12	12	12	12	338.84	102452	15.34	Periodic tryptophan protein 2 homolog	PWP2	#N/A	#N/A	Carbamidomethylation	1583	Homo sapiens	#N/A	0.00937669	0.0537839	2.18031	1.12453	2541330	1881140	1741150	3407100	748386	1283380	956083	1366630
P09110	9	9	9	9	325.535	44292	29.95	3-ketoacyl-CoA thiolase, peroxisomal	ACAA1	Metabolism > Lipid metabolism	unknown	Carbamidomethylation	2113	Homo sapiens	Tpossible_mito	0.0053198	0.0390044	2.17339	1.11994	2414290	1778210	1844110	1404450	988231	679076	639563	1161070
P19387	12	11	12	11	357.309	31441	51.27	DNA-directed RNA polymerase II subunit RPB3	POLR2C	#N/A	#N/A	N/A	1604	Homo sapiens	#N/A	0.00123222	0.017768	2.16781	1.11624	2986870	2882330	2473060	2207360	1069520	1452850	926302	1478500
P07949	32	30	32	30	461.395	124319	29.26	Proto-oncogene tyrosine-protein kinase receptor Ret	RET	#N/A	#N/A	Carbamidomethylation	376	Homo sapiens	#N/A	0.000424354	0.0106933	2.1565	1.10869	7607760	8860600	6787900	7210400	3906500	4258020	3286140	2790850
P83731	10	9	10	9	325.145	17779	42.04	60S ribosomal protein L24	RPL24	#N/A	#N/A	Carbamidomethylation; Oxidation (M)	1789	Homo sapiens	#N/A	0.00908263	0.0532315	2.15448	1.10734	21400000	31400000	18800000	37600000	8564210	13100000	13100000	15000000
P62333	29	29	29	29	458.043	44173	71.21	26S proteasome regulatory subunit 10B	PSMC6	#N/A	#N/A	Carbamidomethylation; Deamidation (NQ); Oxidation (M)	264	Homo sapiens	#N/A	0.00237011	0.0246582	2.15406	1.10706	27200000	40000000	20800000	26600000	10600000	14400000	12900000	14200000
Q9BY50	5	5	5	5	244.68	21542	22.92	Signal peptidase complex catalytic subunit SEC11C	SEC11C	#N/A	#N/A	N/A	3041	Homo sapiens	#N/A	0.00202039	0.0224952	2.15296	1.10632	733070	596913	1023180	538879	290455	336097	354369	324608
Q92616	144	143	144	143	643.137	292710	56.01	eIF-2-alpha kinase activator GCN1	GCN1	#N/A	#N/A	Acetylation (Protein N-term); Carbamidomethylation; Deamidation (NQ); Oxidation (M)	6	Homo sapiens	#N/A	0.00833736	0.0502663	2.15213	1.10577	43300000	83100000	42900000	79600000	25600000	28300000	23600000	33500000
P19525	19	18	19	18	386.106	62094	41.02	Interferon-induced, double-stranded RNA-activated protein kinase	EIF2AK2	#N/A	#N/A	Acetylation (Protein N-term); Carbamidomethylation; Oxidation (M)	935	Homo sapiens	#N/A	0.00174343	0.0211905	2.13893	1.09689	6671240	7493320	4999300	6231160	2264220	3361080	2623230	3726790
P07686	19	16	17	15	396.36	63137	29.5	Beta-hexosaminidase subunit beta	HEXB	#N/A	#N/A	Carbamidomethylation; Oxidation (M)	946	Homo sapiens	#N/A	0.000210709	0.00750615	2.13666	1.09536	8850550	9851290	6809120	6960390	3888690	3605080	4001280	3534500
O15091	12	12	12	12	336.922	67315	21.27	Mitochondrial ribonuclease P catalytic subunit	PRORP	Mitochondrial central dogma > mtRNA metabolism > mtRNA granules | Mitochondrial central dogma > mtRNA metabolism > Polycistronic mtRNA processing	Matrix	Carbamidomethylation	1558	Homo sapiens	Tmito	0.00292595	0.0272198	2.13628	1.0951	1358490	1761770	1113970	1790140	612490	914275	557768	733683
Q16629	13	13	12	12	361.554	27367	40.34	Serine/arginine-rich splicing factor 7	SRSF7	#N/A	#N/A	Carbamidomethylation; Oxidation (M)	1176	Homo sapiens	#N/A	0.0025738	0.0255881	2.13613	1.095	27100000	24500000	17100000	19500000	7964240	12800000	8914790	11700000
P45973	12	12	11	11	348.541	22225	60.21	Chromobox protein homolog 5	CBX5	#N/A	#N/A	Carbamidomethylation	1522	Homo sapiens	#N/A	0.00593498	0.0418333	2.13195	1.09217	5158190	4335070	3167920	2884640	1391470	1875490	1560130	2429400
P61371	5	5	5	5	189.792	39036	13.47	Insulin gene enhancer protein ISL-1	ISL1	#N/A	#N/A	Carbamidomethylation	2930	Homo sapiens	#N/A	0.00631222	0.0432404	2.13134	1.09176	1452400	834971	941022	1001440	333128	639278	468924	554584
Q9GZS3	14	14	14	14	363.197	33581	52.79	SKI8 subunit of superkiller complex protein	SKIC8	#N/A	#N/A	Acetylation (Protein N-term); Carbamidomethylation	1231	Homo sapiens	#N/A	0.00479272	0.0371329	2.12804	1.08953	6047870	6079430	4381650	6512390	2527630	2903980	1846200	3775160
Q8NEB9	4	4	4	4	227.912	101549	5.86	Phosphatidylinositol 3-kinase catalytic subunit type 3	PIK3C3	#N/A	#N/A	N/A	3423	Homo sapiens	#N/A	0.00792527	0.048802	2.12803	1.08952	341269	379033	202993	317507	105297	173615	121054	183704
P15927	3	3	3	3	202.412	29247	16.3	Replication protein A 32 kDa subunit	RPA2	#N/A	#N/A	Carbamidomethylation	3754	Homo sapiens	#N/A	0.00477959	0.0370865	2.12764	1.08925	2445890	2663320	1472980	1998010	744982	1219270	903711	1139690
P46100	10	10	10	10	321.52	282587	5.74	Transcriptional regulator ATRX	ATRX	#N/A	#N/A	Carbamidomethylation	1841	Homo sapiens	#N/A	0.00316703	0.0283939	2.12729	1.08902	1233340	1127100	1049940	1112630	440157	580812	393230	788795
O15397	9	9	8	8	302.847	119938	9.45	Importin-8	IPO8	#N/A	#N/A	Carbamidomethylation	2043	Homo sapiens	#N/A	0.00710687	0.0454892	2.12576	1.08798	850665	1435710	659519	965646	410606	540393	350287	490067
P17301	29	29	29	29	457.138	129296	32.09	Integrin alpha-2	ITGA2	#N/A	#N/A	Carbamidomethylation; Deamidation (NQ); Oxidation (M)	332	Homo sapiens	#N/A	0.00284426	0.0268982	2.12258	1.08582	9867200	16200000	8092740	9943520	4373280	5395900	5097770	5267870
Q9Y5R8	6	6	6	6	262.213	16832	44.14	Trafficking protein particle complex subunit 1	TRAPPC1	#N/A	#N/A	Carbamidomethylation	2595	Homo sapiens	#N/A	0.00295673	0.0272963	2.12122	1.08489	1094880	872191	733102	663194	291556	419152	378735	495467
Q9HA64	8	7	8	7	307.572	34412	20.06	Ketosamine-3-kinase	FN3KRP	#N/A	#N/A	Carbamidomethylation	2324	Homo sapiens	#N/A	0.00318816	0.0284849	2.11138	1.07819	2502180	3622910	1982550	3520290	1288100	1516990	1430960	1138560
Q9UH62	4	4	4	4	198.311	42501	13.46	Armadillo repeat-containing X-linked protein 3	ARMCX3	Mitochondrial dynamics and surveillance > Trafficking	MOM	N/A	3113	Homo sapiens	Tpossible_mito	0.000473856	0.0112651	2.10797	1.07585	501656	451724	369888	355679	160066	205505	206372	222421
Q9Y230	42	42	42	42	500.657	51157	74.3	RuvB-like 2	RUVBL2	#N/A	#N/A	Acetylation (Protein N-term); Carbamidomethylation; Deamidation (NQ); Oxidation (M)	147	Homo sapiens	#N/A	0.00142953	0.0193247	2.10609	1.07456	87000000	110000000	63000000	74000000	36700000	44100000	33600000	41700000
Q92878	76	73	76	73	563.137	153892	55.11	DNA repair protein RAD50	RAD50	#N/A	#N/A	Carbamidomethylation; Deamidation (NQ); Oxidation (M)	38	Homo sapiens	#N/A	0.000126321	0.00573098	2.1017	1.07156	34000000	36900000	26300000	34200000	16200000	17100000	14600000	14300000
Q8IZ81	5	5	5	5	255.885	34961	17.75	ELMO domain-containing protein 2	ELMOD2	#N/A	#N/A	Carbamidomethylation; Oxidation (M)	2733	Homo sapiens	#N/A	0.00218962	0.0233875	2.10163	1.07151	1712230	1917100	1718600	2166970	1180870	630740	1001500	840046
P62829	13	13	13	13	359.533	14865	68.57	60S ribosomal protein L23	RPL23	#N/A	#N/A	Carbamidomethylation; Oxidation (M)	1174	Homo sapiens	#N/A	0.00370561	0.0314311	2.10159	1.07148	33700000	44100000	29700000	37500000	12300000	21000000	15000000	21900000
Q9NQT5	9	8	9	8	311.181	29572	42.91	Exosome complex component RRP40	EXOSC3	#N/A	#N/A	Carbamidomethylation	2089	Homo sapiens	#N/A	0.00773466	0.0479124	2.10016	1.0705	2366660	2843510	1504560	2381900	1251470	930172	777260	1370140
Q9H0V9	5	4	5	4	239.579	39711	17.24	VIP36-like protein	LMAN2L	#N/A	#N/A	Carbamidomethylation	3101	Homo sapiens	#N/A	0.00523006	0.0387846	2.09996	1.07036	1327750	1029620	1350560	816919	388318	570216	708491	494401
P05387	9	9	8	8	315.776	11665	80.87	60S acidic ribosomal protein P2	RPLP2	#N/A	#N/A	N/A	1851	Homo sapiens	#N/A	0.00213266	0.0229681	2.0995	1.07005	4565780	5505220	3180790	5098270	2123640	1756480	2568520	2189680
P49959	23	22	23	22	423.427	80593	35.03	Double-strand break repair protein MRE11	MRE11	#N/A	#N/A	Acetylation (Protein N-term); Carbamidomethylation	712	Homo sapiens	#N/A	0.00112556	0.0166592	2.09804	1.06904	7643940	7661100	5153390	6117320	2958140	3797110	2562900	3309810
P14210	35	34	35	34	477.131	83134	51.79	Hepatocyte growth factor	HGF	#N/A	#N/A	Carbamidomethylation; Deamidation (NQ); Oxidation (M)	299	Homo sapiens	#N/A	0.0051823	0.0385406	2.09347	1.06589	26300000	19100000	23200000	16600000	9880880	12200000	6793000	12300000
Q969X5	11	11	11	11	347.841	32592	41.38	Endoplasmic reticulum-Golgi intermediate compartment protein 1	ERGIC1	#N/A	#N/A	Carbamidomethylation; Deamidation (NQ); Oxidation (M)	1560	Homo sapiens	#N/A	0.00504755	0.0379031	2.08717	1.06155	18300000	11600000	13400000	9472380	5777060	8155560	5106360	5901620
P45877	5	5	4	4	246.81	22763	17.45	Peptidyl-prolyl cis-trans isomerase C	PPIC	#N/A	#N/A	N/A	2870	Homo sapiens	#N/A	0.00119781	0.0174169	2.08665	1.06119	1190980	1269290	1103770	1087040	426345	621862	488530	738664
Q8NBX0	9	9	9	9	327.036	47151	21.45	Saccharopine dehydrogenase-like oxidoreductase	SCCPDH	#N/A	#N/A	Carbamidomethylation; Oxidation (M)	1855	Homo sapiens	#N/A	0.0073745	0.0465706	2.0854	1.06033	10500000	6414900	6494900	5418880	2711010	3851590	2764930	4341580
Q9BQG0	45	45	45	45	509.248	148855	38.1	Myb-binding protein 1A	MYBBP1A	#N/A	#N/A	Carbamidomethylation; Oxidation (M)	185	Homo sapiens	#N/A	0.00024927	0.00799914	2.08072	1.05709	15300000	15200000	13300000	13400000	5650050	7826220	8051920	6210540
Q96IX5	3	3	3	3	213.774	6458	44.83	ATP synthase membrane subunit K, mitochondrial	ATP5MK	OXPHOS > Complex V > CV subunits | OXPHOS > OXPHOS subunits | Mitochondrial dynamics and surveillance > Cristae formation	MIM	N/A	3880	Homo sapiens	Tmito	0.00702853	0.0452055	2.0797	1.05638	1841570	835427	1468720	1562370	555114	660621	738996	696373
P21953	7	7	7	7	293.027	43122	23.47	2-oxoisovalerate dehydrogenase subunit beta, mitochondrial	BCKDHB	Metabolism > Amino acid metabolism > Branched-chain amino acid metabolism | Metabolism > Amino acid metabolism > Branched-chain amino acid dehydrogenase complex	MIM	Carbamidomethylation; Oxidation (M)	2187	Homo sapiens	Tmito	0.00794569	0.0488388	2.07584	1.0537	762428	1251630	970551	1386970	390636	657850	431818	623418
Q96DI7	15	15	15	15	384.631	39311	54.62	U5 small nuclear ribonucleoprotein 40 kDa protein	SNRNP40	#N/A	#N/A	Carbamidomethylation; Deamidation (NQ); Oxidation (M)	982	Homo sapiens	#N/A	0.00405841	0.0336073	2.06981	1.0495	8254400	9223560	6460570	8226470	2625070	3912000	4108160	5225860
Q92820	14	13	14	13	368.766	35964	36.48	Gamma-glutamyl hydrolase	GGH	#N/A	#N/A	N/A	1333	Homo sapiens	#N/A	0.00112965	0.0166592	2.06856	1.04863	13000000	12300000	11400000	9613360	6383600	6668350	4173960	5386740
P21127	18	18	18	18	382.753	92620	20.88	Cyclin-dependent kinase 11B	CDK11B	#N/A	#N/A	Carbamidomethylation; Oxidation (M)	1038	Homo sapiens	#N/A	0.0076687	0.0476745	2.06754	1.04792	6331940	6083970	4222780	5334920	1902240	4049740	2673320	2306150
P23919	18	18	18	18	397.565	23819	67.92	Thymidylate kinase	DTYMK	Metabolism > Nucleotide metabolism > Nucleotide synthesis and processing	Matrix	Carbamidomethylation; Deamidation (NQ)	930	Homo sapiens	Tpossible_mito	0.00203799	0.0224952	2.05783	1.04112	19800000	18400000	13700000	16200000	6867190	9265890	6685120	10600000
Q13510	9	9	9	9	319.403	44660	22.78	Acid ceramidase	ASAH1	#N/A	#N/A	Carbamidomethylation; Deamidation (NQ)	1871	Homo sapiens	#N/A	0.00870782	0.0518375	2.05699	1.04053	4053490	3860180	3596540	3023290	2974550	1567200	1458150	1398070
Q99720	3	3	3	3	192.352	25128	14.8	Sigma non-opioid intracellular receptor 1	SIGMAR1	#N/A	#N/A	N/A	3522	Homo sapiens	#N/A	0.00939553	0.0538325	2.05662	1.04028	2596730	1565530	1942530	1363840	779313	1184810	655592	994511
O60831	3	3	3	3	204.818	19258	22.47	PRA1 family protein 2	PRAF2	#N/A	#N/A	Carbamidomethylation; Oxidation (M)	3697	Homo sapiens	#N/A	0.000128696	0.00575916	2.04816	1.03433	3293760	2803020	3168210	2441690	1282390	1467790	1353400	1593150
P10909	13	13	13	13	346.283	52495	32.96	Clusterin	CLU	#N/A	#N/A	Carbamidomethylation	1480	Homo sapiens	#N/A	0.00506007	0.0379031	2.04598	1.03279	7497310	4668480	6556870	4904400	2797340	3892510	2728240	2162210
P43243	42	41	41	40	500.931	94623	47.23	Matrin-3	MATR3	#N/A	#N/A	Carbamidomethylation; Deamidation (NQ); Oxidation (M)	203	Homo sapiens	#N/A	0.00475869	0.037035	2.04512	1.03219	55700000	45200000	30900000	36100000	16200000	23400000	17500000	24200000
Q9HDC9	23	23	23	23	429.526	46480	57.69	Adipocyte plasma membrane-associated protein	APMAP	#N/A	#N/A	Carbamidomethylation; Oxidation (M)	512	Homo sapiens	#N/A	0.00138356	0.0189599	2.04128	1.02948	36900000	26700000	30900000	22500000	15900000	15500000	11600000	13800000
Q9NVR2	4	3	4	3	198.165	82236	4.37	Integrator complex subunit 10	INTS10	#N/A	#N/A	N/A	3282	Homo sapiens	#N/A	0.00371487	0.0314582	2.03825	1.02733	270286	316395	374104	260193	103499	180496	143692	179669
Q96CS3	15	15	15	15	383.64	52623	44.04	FAS-associated factor 2	FAF2	#N/A	#N/A	Carbamidomethylation; Deamidation (NQ); Oxidation (M)	887	Homo sapiens	#N/A	0.00584443	0.0416165	2.03548	1.02537	6664950	4923050	6725710	4042000	2443110	3595770	2077880	2846720
Q9P289	18	18	7	7	393.255	46529	24.28	Serine/threonine-protein kinase 26	STK26	#N/A	#N/A	Acetylation (Protein N-term); Carbamidomethylation; Oxidation (M)	1010	Homo sapiens	#N/A	0.00377006	0.0317186	2.035	1.02503	3058380	2537130	1787180	1722550	1088240	1295900	925947	1066690
Q07954	81	74	80	73	568.734	504606	18.95	Prolow-density lipoprotein receptor-related protein 1	LRP1	#N/A	#N/A	Carbamidomethylation; Oxidation (M)	40	Homo sapiens	#N/A	0.00168193	0.0209094	2.0316	1.02262	14000000	16200000	10600000	13000000	6748620	7972250	6820300	4999610
Q969V3	23	23	23	23	425.893	62974	42.98	Nicalin	NCLN	#N/A	#N/A	Oxidation (M)	694	Homo sapiens	#N/A	0.000197996	0.00739992	2.01856	1.01333	7639000	10200000	8347720	9316170	4369460	4831250	4687900	3688120
Q15006	10	10	10	10	322.345	34834	41.08	ER membrane protein complex subunit 2	EMC2	#N/A	#N/A	Carbamidomethylation; Oxidation (M)	1946	Homo sapiens	#N/A	0.00489516	0.0373688	2.0185	1.01328	4499720	2741380	3565990	2202100	1531300	1774220	1480780	1450440
P57088	9	9	9	9	310.711	27978	31.17	Transmembrane protein 33	TMEM33	#N/A	#N/A	Carbamidomethylation; Oxidation (M)	1911	Homo sapiens	#N/A	0.0059765	0.0419941	2.01759	1.01263	9352840	8425900	7131650	11000000	4252690	4680330	3067260	6111080
Q14643	9	9	9	9	312.318	313929	3.59	Inositol 1,4,5-trisphosphate receptor type 1	ITPR1	#N/A	#N/A	Carbamidomethylation	1976	Homo sapiens	#N/A	0.00959424	0.0545172	2.01547	1.01112	1016400	1021510	816140	1226330	377108	412534	800008	506006
P62136	22	22	5	5	431.2	37512	16.06	Serine/threonine-protein phosphatase PP1-alpha catalytic subunit	PPP1CA	#N/A	#N/A	Acetylation (Protein N-term)	665	Homo sapiens	#N/A	0.00332682	0.029277	2.00373	1.00269	9630820	10300000	7372900	9961040	3664150	5864300	3747310	5612810
Q9BVP2	17	17	16	16	387.261	61993	35.7	Guanine nucleotide-binding protein-like 3	GNL3	#N/A	#N/A	Carbamidomethylation; Oxidation (M)	1056	Homo sapiens	#N/A	0.00651461	0.044033	1.99468	0.996155	3625090	2704360	2242200	2625270	955561	1834500	1504230	1382460
Q15645	19	19	19	19	400.017	48551	45.37	Pachytene checkpoint protein 2 homolog	TRIP13	#N/A	#N/A	Carbamidomethylation; Oxidation (M)	793	Homo sapiens	#N/A	0.00934357	0.0537721	1.98977	0.992602	10600000	13000000	8499910	12900000	3619580	5569740	6805570	7025600
A1L0T0	11	10	11	10	340.678	67868	22.31	2-hydroxyacyl-CoA lyase 2	ILVBL	#N/A	#N/A	Carbamidomethylation; Deamidation (NQ); Oxidation (M)	1471	Homo sapiens	#N/A	0.000547913	0.0115619	1.98878	0.991884	1352330	1638100	1393400	2018460	692918	835099	810227	849471
P11310	15	14	15	14	379.945	46588	32.54	Medium-chain specific acyl-CoA dehydrogenase, mitochondrial	ACADM	Metabolism > Lipid metabolism > Fatty acid oxidation	Matrix	N/A	1280	Homo sapiens	Tmito	0.00208198	0.0226825	1.98326	0.987873	14100000	15700000	10800000	12700000	5846250	8741320	5446890	7050600
Q9UI30	5	4	5	4	257.685	14199	42.4	Multifunctional methyltransferase subunit TRM112-like protein	TRMT112	#N/A	#N/A	Carbamidomethylation	2864	Homo sapiens	#N/A	0.00111209	0.0165887	1.98156	0.986634	2406340	2417630	2450200	2417350	929746	1244480	1175170	1643650
P33991	43	43	43	43	500.483	96558	52.49	DNA replication licensing factor MCM4	MCM4	#N/A	#N/A	Carbamidomethylation; Deamidation (NQ); Oxidation (M)	146	Homo sapiens	#N/A	0.00220792	0.0234863	1.97787	0.983946	25000000	33500000	19500000	25900000	10600000	14900000	12500000	14000000
Q9NR31	12	11	8	7	354.366	22367	37.88	GTP-binding protein SAR1a	SAR1A	#N/A	#N/A	Carbamidomethylation; Oxidation (M)	1128	Homo sapiens	#N/A	0.00110388	0.0165136	1.97635	0.982841	4511260	5089120	3822680	4352910	2116890	2077950	1898340	2998620
Q92841	34	34	25	25	473.504	80272	31.96	Probable ATP-dependent RNA helicase DDX17	DDX17	#N/A	#N/A	Carbamidomethylation; Deamidation (NQ); Oxidation (M)	279	Homo sapiens	#N/A	0.00162157	0.0205391	1.9756	0.98229	18300000	26700000	16200000	20100000	8733580	12000000	10300000	9675410
Q29RF7	32	32	28	28	466.325	150830	24.31	Sister chromatid cohesion protein PDS5 homolog A	PDS5A	#N/A	#N/A	Carbamidomethylation; Oxidation (M)	413	Homo sapiens	#N/A	0.00266017	0.0260445	1.9709	0.978851	4937530	7292080	3939620	6022030	2934260	2862360	2453790	2746900
Q8NBJ7	13	13	13	13	356.282	33843	40.86	Inactive C-alpha-formylglycine-generating enzyme 2	SUMF2	#N/A	#N/A	Carbamidomethylation; Oxidation (M)	1496	Homo sapiens	#N/A	0.00305925	0.027831	1.96822	0.976893	4839050	3793590	3797960	3082290	1839610	2614640	1563850	1903730
Q7Z2W4	27	27	27	27	445.043	101431	36.03	Zinc finger CCCH-type antiviral protein 1	ZC3HAV1	#N/A	#N/A	Acetylation (Protein N-term); Carbamidomethylation; Deamidation (NQ); Oxidation (M)	522	Homo sapiens	#N/A	0.00914413	0.053288	1.96447	0.974143	5325160	7849850	8584160	5331990	2349440	3435660	4173180	3813760
P49447	3	3	3	3	207.116	27559	14.34	Transmembrane ascorbate-dependent reductase CYB561	CYB561	#N/A	#N/A	Oxidation (M)	3275	Homo sapiens	#N/A	0.00483437	0.0371838	1.96277	0.972889	3508030	4635230	2624010	3193510	2031200	1923340	1299420	1808570
Q13263	35	35	35	35	478.627	88550	61.56	Transcription intermediary factor 1-beta	TRIM28	#N/A	#N/A	Acetylation (Protein N-term); Carbamidomethylation; Deamidation (NQ); Oxidation (M)	176	Homo sapiens	#N/A	0.00815767	0.0497608	1.96177	0.972157	29600000	34700000	20800000	30800000	9961180	17400000	17800000	14400000
Q96AY3	17	17	16	16	376.047	64245	30.76	Peptidyl-prolyl cis-trans isomerase FKBP10	FKBP10	Protein import, sorting and homeostasis > Protein homeostasis > Chaperones	IMS	Carbamidomethylation; Oxidation (M)	845	Homo sapiens	Tmito	0.00314181	0.0282654	1.95739	0.96893	9081790	8141940	9320000	6734000	4534410	5744230	3513100	3454920
Q14498	15	15	14	14	380.142	59380	29.62	RNA-binding protein 39	RBM39	#N/A	#N/A	Carbamidomethylation; Oxidation (M)	1136	Homo sapiens	#N/A	0.00647897	0.0439472	1.95627	0.968105	5744740	8963550	5160520	7992360	2912090	3760680	2996540	4418890
O75396	7	7	7	7	274.46	24741	42.33	Vesicle-trafficking protein SEC22b	SEC22B	#N/A	#N/A	Oxidation (M)	2233	Homo sapiens	#N/A	0.00681951	0.0446906	1.95161	0.964663	3244970	3197530	3258370	2185810	1135410	1986760	1268660	1780010
Q96L58	7	7	7	7	266.443	37138	24.01	Beta-1,3-galactosyltransferase 6	B3GALT6	#N/A	#N/A	Carbamidomethylation	2537	Homo sapiens	#N/A	0.000440365	0.0108854	1.94858	0.962425	1300060	1513260	1239410	1015180	569300	716822	671482	626573
O60884	16	16	16	16	386.306	45746	43.2	DnaJ homolog subfamily A member 2	DNAJA2	#N/A	#N/A	Carbamidomethylation; Oxidation (M)	1190	Homo sapiens	#N/A	0.00746964	0.0468917	1.94846	0.962334	14500000	12800000	19100000	9746270	7279620	8941410	5787410	6363340
Q7Z3K3	16	15	16	15	370.064	155344	13.62	Pogo transposable element with ZNF domain	POGZ	#N/A	#N/A	Carbamidomethylation; Oxidation (M)	1138	Homo sapiens	#N/A	0.00134652	0.0187984	1.9474	0.961551	2236480	2864780	1921020	2625570	975071	1303960	1399050	1263140
A6NHR9	50	48	50	48	503.465	226374	28.58	Structural maintenance of chromosomes flexible hinge domain-containing protein 1	SMCHD1	#N/A	#N/A	Carbamidomethylation	167	Homo sapiens	#N/A	0.00382247	0.0320557	1.94679	0.9611	11200000	8304870	8277300	12300000	5498190	5970240	3735050	5377190
Q9BRX8	13	13	13	13	359.021	25764	43.23	Peroxiredoxin-like 2A	PRXL2A	Metabolism > Detoxification > ROS and glutathione metabolism	Membrane	Oxidation (M)	1401	Homo sapiens	Tmito	3.84076e-05	0.00249217	1.94509	0.95984	7619000	6573420	7063350	7224580	3459970	4041590	3228120	3955270
O43681	12	12	12	12	355.293	38793	42.82	ATPase GET3	GET3	#N/A	#N/A	Carbamidomethylation; Oxidation (M)	1425	Homo sapiens	#N/A	0.00212607	0.0229447	1.94045	0.956389	7683330	7415680	6155470	7036030	3559300	4142680	2619920	4505570
P53582	9	9	9	9	307.665	43215	31.87	Methionine aminopeptidase 1	METAP1	#N/A	#N/A	Carbamidomethylation	2132	Homo sapiens	#N/A	0.00363186	0.0311106	1.93533	0.952582	2030920	2123680	1520610	1370270	812837	1089830	722033	1001530
Q13724	29	28	29	28	449.354	91918	40.86	Mannosyl-oligosaccharide glucosidase	MOGS	#N/A	#N/A	Carbamidomethylation; Deamidation (NQ); Oxidation (M)	389	Homo sapiens	#N/A	0.00677586	0.0446515	1.92573	0.945403	15100000	24300000	14800000	22600000	8951800	12700000	8129860	9655520
O00571	44	43	43	42	502.784	73243	61.18	ATP-dependent RNA helicase DDX3X	DDX3X	#N/A	#N/A	Carbamidomethylation; Oxidation (M)	162	Homo sapiens	#N/A	0.000940742	0.0158306	1.92274	0.94316	51300000	50100000	40000000	41100000	20700000	25800000	20100000	28800000
O00487	11	9	11	9	333.555	34577	39.68	26S proteasome non-ATPase regulatory subunit 14	PSMD14	#N/A	#N/A	Carbamidomethylation; Deamidation (NQ); Oxidation (M)	1129	Homo sapiens	#N/A	0.000728337	0.0136033	1.90756	0.931726	8841670	9954920	6439730	8461460	4146100	4458430	4008270	4888740
Q16799	7	6	6	6	297.389	83618	9.54	Reticulon-1	RTN1	#N/A	#N/A	Carbamidomethylation	2437	Homo sapiens	#N/A	0.00126473	0.0179081	1.90717	0.931437	11200000	11800000	9752760	9328430	4800120	5773020	4616840	7103570
Q53EL6	14	14	14	14	375.604	51735	39.02	Programmed cell death protein 4	PDCD4	#N/A	#N/A	Carbamidomethylation; Deamidation (NQ); Oxidation (M)	1224	Homo sapiens	#N/A	0.00898401	0.0528753	1.90619	0.930694	3916500	4565450	2407440	4041950	1620940	2402490	2058210	1644150
P50213	14	14	14	14	370.667	39592	38.25	Isocitrate dehydrogenase [NAD] subunit alpha, mitochondrial	IDH3A	Metabolism > Carbohydrate metabolism > TCA cycle	Matrix	Carbamidomethylation; Oxidation (M)	1184	Homo sapiens	Tmito	0.00258129	0.0255881	1.90541	0.930105	5984610	6552990	4510290	5268190	2491450	3895830	2578220	2824960
O43324	11	11	11	11	339.367	19811	66.67	Eukaryotic translation elongation factor 1 epsilon-1	EEF1E1	#N/A	#N/A	Acetylation (Protein N-term); Carbamidomethylation	1719	Homo sapiens	#N/A	0.00312832	0.0282419	1.90498	0.929776	4150210	6175490	3658290	5466330	2342770	2198180	2906590	2600010
Q14683	55	54	55	54	519.771	143233	43.15	Structural maintenance of chromosomes protein 1A	SMC1A	#N/A	#N/A	Carbamidomethylation; Oxidation (M)	125	Homo sapiens	#N/A	0.00203504	0.0224952	1.90272	0.928066	20300000	22900000	14100000	19400000	9025830	11400000	8650300	10900000
Q96DV4	9	9	9	9	310.587	44597	28.95	39S ribosomal protein L38, mitochondrial	MRPL38	Mitochondrial central dogma > Translation > Mitochondrial ribosome	Matrix	Carbamidomethylation	2073	Homo sapiens	Tmito	0.00587666	0.0416256	1.89848	0.924843	5965810	6691780	4140260	6094750	2539960	4106700	2873440	2587330
Q13409	17	17	17	17	389.854	71457	40.44	Cytoplasmic dynein 1 intermediate chain 2	DYNC1I2	#N/A	#N/A	Carbamidomethylation; Oxidation (M)	957	Homo sapiens	#N/A	0.00891134	0.0527466	1.89305	0.920709	13600000	11800000	7925870	9655320	4815230	6925640	4286280	6690090
Q9Y6Y0	10	9	10	9	323.889	71729	16.67	Influenza virus NS1A-binding protein	IVNS1ABP	#N/A	#N/A	Carbamidomethylation	1888	Homo sapiens	#N/A	0.00253404	0.0255881	1.89227	0.920116	1311340	1635320	1112680	1558160	577706	741482	913660	740934
Q8N2K0	12	12	12	12	339.122	45097	39.2	Lysophosphatidylserine lipase ABHD12	ABHD12	#N/A	#N/A	Carbamidomethylation	1564	Homo sapiens	#N/A	0.000524604	0.0113851	1.887	0.916098	4421010	4018530	3810520	3240200	1853000	2498000	1942770	1923830
O75844	11	11	11	11	332.925	54813	24.42	CAAX prenyl protease 1 homolog	ZMPSTE24	#N/A	#N/A	Oxidation (M)	1742	Homo sapiens	#N/A	0.000887681	0.0153088	1.88427	0.914002	3759240	3445020	3506460	3555400	1608580	2118760	1577360	2382470
O96008	14	14	14	14	355.83	37893	48.2	Mitochondrial import receptor subunit TOM40 homolog	TOMM40	Protein import, sorting and homeostasis > Protein import and sorting > TOM	MOM	Carbamidomethylation; Deamidation (NQ); Oxidation (M)	849	Homo sapiens	Tmito	0.00028748	0.0085765	1.88398	0.913781	10600000	13500000	9399360	11200000	5941220	6302520	5284170	6043490
Q9BSJ8	31	30	30	29	458.728	122856	35.05	Extended synaptotagmin-1	ESYT1	#N/A	#N/A	Carbamidomethylation; Deamidation (NQ); Oxidation (M)	346	Homo sapiens	#N/A	0.00186594	0.0214937	1.88146	0.911854	11600000	12600000	9148300	11700000	6021180	7066170	4512660	6502420
O75131	23	23	22	22	431.86	60131	45.44	Copine-3	CPNE3	#N/A	#N/A	Carbamidomethylation; Deamidation (NQ); Oxidation (M)	495	Homo sapiens	#N/A	0.00549522	0.0396741	1.87984	0.910607	23600000	28000000	22000000	26600000	14700000	15200000	8771540	15800000
Q9Y383	19	19	13	13	403.31	46514	28.06	Putative RNA-binding protein Luc7-like 2	LUC7L2	#N/A	#N/A	Carbamidomethylation; Oxidation (M)	854	Homo sapiens	#N/A	0.00574784	0.0410978	1.87397	0.906095	5213740	5464230	3603770	4129040	2613380	3193340	1897560	2170670
P24941	10	9	8	8	324.185	33930	34.23	Cyclin-dependent kinase 2	CDK2	#N/A	#N/A	Carbamidomethylation; Oxidation (M)	1803	Homo sapiens	#N/A	0.00898013	0.0528753	1.86592	0.899888	1300430	1147910	1070450	1038900	528216	694141	427268	874177
Q8NHH9	7	7	6	6	269.492	66229	12.69	Atlastin-2	ATL2	#N/A	#N/A	N/A	2513	Homo sapiens	#N/A	0.000193242	0.00739992	1.8632	0.897784	2120390	1864620	1520880	1597180	920818	938421	984655	936610
Q9NUM4	6	6	6	6	278.717	31127	22.63	Transmembrane protein 106B	TMEM106B	#N/A	#N/A	Carbamidomethylation	2731	Homo sapiens	#N/A	0.00990513	0.0555221	1.85425	0.890834	1864520	1671100	2731850	1517540	977298	1126120	1272380	780309
E9PAV3	9	9	9	9	320.54	205422	5.92	Nascent polypeptide-associated complex subunit alpha, muscle-specific form	NACA	#N/A	#N/A	Oxidation (M)	1859	Homo sapiens	#N/A	0.00421763	0.0343161	1.84529	0.883846	19600000	13400000	13200000	12200000	7105380	9482570	6432520	8416710
Q9NSE4	29	29	29	29	453.875	113792	34.88	Isoleucine--tRNA ligase, mitochondrial	IARS2	Mitochondrial central dogma > Translation > mt-tRNA synthetases	Matrix	Carbamidomethylation; Oxidation (M)	490	Homo sapiens	Tmito	0.00610747	0.0426416	1.83911	0.879006	12400000	15800000	9428930	12400000	5726540	8626740	5596790	7241930
P51659	43	42	43	42	501.457	79686	62.09	Peroxisomal multifunctional enzyme type 2	HSD17B4	Metabolism > Lipid metabolism	unknown	Carbamidomethylation; Deamidation (NQ); Oxidation (M)	155	Homo sapiens	Tpossible_mito	0.00978232	0.0551357	1.83086	0.87252	33400000	23400000	25000000	28300000	12400000	17700000	11100000	20200000
P26196	10	9	10	9	327.55	54417	22.98	Probable ATP-dependent RNA helicase DDX6	DDX6	#N/A	#N/A	Carbamidomethylation; Oxidation (M)	1819	Homo sapiens	#N/A	0.00287055	0.0269021	1.82878	0.870883	5347320	7221220	5762590	6611260	2694830	4436400	3142960	3500260
O43684	14	13	14	13	366.651	37155	52.13	Mitotic checkpoint protein BUB3	BUB3	#N/A	#N/A	Carbamidomethylation; Deamidation (NQ); Oxidation (M)	1236	Homo sapiens	#N/A	0.00630292	0.0432404	1.82353	0.866735	8624960	9470180	7257950	7612830	4130730	6316840	3339090	4684570
P52564	12	12	12	12	333.109	37492	39.52	Dual specificity mitogen-activated protein kinase kinase 6	MAP2K6	#N/A	#N/A	Carbamidomethylation; Oxidation (M)	1598	Homo sapiens	#N/A	0.0080399	0.0492741	1.81073	0.856573	3284430	3359280	2173650	3138330	1329060	1579630	1485910	2244330
Q07157	26	26	25	25	431.466	195459	18.14	Tight junction protein ZO-1	TJP1	#N/A	#N/A	N/A	596	Homo sapiens	#N/A	0.00925033	0.0534911	1.8049	0.851917	4272530	3163150	3240370	2380760	1864410	2301840	1470600	1556670
Q9H7Z7	11	11	11	11	345.469	41943	32.36	Prostaglandin E synthase 2	PTGES2	Metabolism > Lipid metabolism > Eicosanoid metabolism	MIM	Carbamidomethylation	1692	Homo sapiens	Tmito	0.0032296	0.0287161	1.80147	0.849175	1898480	1875310	1532700	1646920	701216	1043920	975883	1194500
Q9BY41	4	4	4	4	207.107	41758	14.85	Histone deacetylase 8	HDAC8	#N/A	#N/A	Carbamidomethylation	3232	Homo sapiens	#N/A	0.0013804	0.0189599	1.79893	0.847139	364472	418357	327405	382793	167374	227775	189869	252090
Q92538	18	16	18	16	383.578	206446	9.9	Golgi-specific brefeldin A-resistance guanine nucleotide exchange factor 1	GBF1	#N/A	#N/A	Carbamidomethylation	997	Homo sapiens	#N/A	0.00215393	0.0231361	1.79284	0.842244	2180270	2606980	1776420	2040560	1173300	1220550	968373	1438040
A8MXV4	4	3	4	3	231.157	42233	9.6	Acyl-coenzyme A diphosphatase NUDT19	NUDT19	Metabolism > Metals and cofactors > Coenzyme A metabolism	Matrix	N/A	3173	Homo sapiens	Tmito	0.0035564	0.0306666	1.79145	0.841127	711207	658076	608079	820222	312282	509285	342990	415485
Q9HCG8	7	6	7	6	282.289	105466	6.94	Pre-mRNA-splicing factor CWC22 homolog	CWC22	#N/A	#N/A	N/A	2410	Homo sapiens	#N/A	0.00125025	0.017839	1.79023	0.840145	833856	1305330	1020260	1179170	627143	581539	554630	630251
Q9P2R7	17	16	17	16	381.667	50317	40.39	Succinate--CoA ligase [ADP-forming] subunit beta, mitochondrial	SUCLA2	Metabolism > Carbohydrate metabolism > TCA cycle | Metabolism > Carbohydrate metabolism > Itaconate metabolism | Metabolism > Nucleotide metabolism > Nucleotide synthesis and processing	Matrix	Carbamidomethylation	1112	Homo sapiens	Tmito	0.00623976	0.0431925	1.78584	0.836606	6456710	5497670	4623160	5003970	2829360	3360700	2199500	3860360
O75127	3	3	3	3	178.977	78856	5.86	Pentatricopeptide repeat-containing protein 1, mitochondrial	PTCD1	Mitochondrial central dogma > mtRNA metabolism > mtRNA granules	Matrix	Carbamidomethylation	3810	Homo sapiens	Tpossible_mito	0.00065106	0.0129549	1.78044	0.832238	143996	185916	157176	158780	75531.3	85618.7	100682	102114
O14776	16	15	16	15	373.11	123901	13.93	Transcription elongation regulator 1	TCERG1	#N/A	#N/A	Carbamidomethylation	1191	Homo sapiens	#N/A	0.00587778	0.0416256	1.77657	0.829098	3379180	2420290	2099830	1979400	1246140	1666430	1281600	1282200
Q9NPQ8	17	16	16	15	386.523	59710	32.96	Synembryn-A	RIC8A	#N/A	#N/A	Carbamidomethylation	1096	Homo sapiens	#N/A	0.000823624	0.0146289	1.76725	0.821506	2484010	3448540	2311220	2459790	1446860	1563640	1455290	1516440
P35249	22	20	22	20	413.342	39682	57.58	Replication factor C subunit 4	RFC4	#N/A	#N/A	Carbamidomethylation; Deamidation (NQ)	575	Homo sapiens	#N/A	0.00108397	0.016405	1.76202	0.81723	12600000	9990510	9500150	8583490	5040040	6479700	5843980	5579720
Q07960	18	17	18	17	401.741	50436	41.69	Rho GTPase-activating protein 1	ARHGAP1	#N/A	#N/A	Carbamidomethylation; Oxidation (M)	1022	Homo sapiens	#N/A	0.00421212	0.0343161	1.76008	0.815638	7290860	10600000	6112500	8297610	3882890	4816820	4561320	4787660
O95197	6	6	5	5	271.172	112611	6.98	Reticulon-3	RTN3	#N/A	#N/A	Acetylation (Protein N-term); Carbamidomethylation; Deamidation (NQ)	2343	Homo sapiens	#N/A	0.00440732	0.0350358	1.75858	0.814413	10900000	9498020	7978540	8827170	4824590	5815060	4058980	6694580
P31942	12	12	10	10	354.362	36926	40.46	Heterogeneous nuclear ribonucleoprotein H3	HNRNPH3	#N/A	#N/A	Oxidation (M)	1376	Homo sapiens	#N/A	0.00828447	0.0502105	1.74836	0.806005	27100000	22200000	17700000	17400000	9590220	11500000	11600000	15500000
P62995	15	15	11	11	369.703	33666	44.79	Transformer-2 protein homolog beta	TRA2B	#N/A	#N/A	Acetylation (Protein N-term); Carbamidomethylation; Deamidation (NQ); Oxidation (M)	1085	Homo sapiens	#N/A	0.00692588	0.0448282	1.74308	0.801639	9926530	8043250	5554930	8290350	3811400	4448390	4481780	5241710
Q08AM6	24	22	24	22	426.958	87973	32.86	Protein VAC14 homolog	VAC14	#N/A	#N/A	Carbamidomethylation	642	Homo sapiens	#N/A	0.00674483	0.0446515	1.74193	0.800686	3167860	5209780	3992720	4171590	3012540	1962630	2163680	2333840
Q9BWM7	15	14	13	13	381.852	35503	48.91	Sideroflexin-3	SFXN3	Metabolism > Amino acid metabolism > Serine metabolism | Metabolism > Vitamin metabolism > Folate and 1-C metabolism | Small molecule transport > Sideroflexins	MIM	Acetylation (Protein N-term); Deamidation (NQ); Oxidation (M)	961	Homo sapiens	Tpossible_mito	0.00918623	0.0533995	1.73804	0.797459	6033490	5110270	3691280	4584810	2716920	3379030	2075390	3001270
Q7L0Y3	24	24	24	24	419.356	47347	60.79	tRNA methyltransferase 10 homolog C	TRMT10C	Mitochondrial central dogma > mtRNA metabolism > mtRNA granules | Mitochondrial central dogma > mtRNA metabolism > Polycistronic mtRNA processing | Mitochondrial central dogma > mtRNA metabolism > mt-tRNA modifications	Matrix	Carbamidomethylation; Oxidation (M)	591	Homo sapiens	Tmito	0.0028356	0.0268982	1.72893	0.789879	17200000	15100000	15100000	12900000	7293920	8789290	7815720	11300000
Q9UNM6	23	23	23	23	431.983	42945	57.45	26S proteasome non-ATPase regulatory subunit 13	PSMD13	#N/A	#N/A	Carbamidomethylation; Oxidation (M)	547	Homo sapiens	#N/A	0.00176176	0.0211905	1.72295	0.784878	38900000	44900000	28800000	34100000	21200000	23200000	20400000	19400000
Q8TBX8	9	8	9	8	313.052	47300	16.63	Phosphatidylinositol 5-phosphate 4-kinase type-2 gamma	PIP4K2C	#N/A	#N/A	Carbamidomethylation	2066	Homo sapiens	#N/A	0.00695717	0.0449187	1.72124	0.783446	1724980	2057410	1451920	1596250	935792	1284340	746275	1044790
Q9NZB2	25	25	23	23	426.04	121888	26.12	Constitutive coactivator of PPAR-gamma-like protein 1	FAM120A	#N/A	#N/A	Carbamidomethylation	618	Homo sapiens	#N/A	0.00508777	0.0380009	1.72038	0.782724	4182920	5696830	3637330	5462690	2246340	2869160	2754510	3044620
Q49A26	4	4	4	4	196.211	60547	9.22	Cytokine-like nuclear factor N-PAC	GLYR1	#N/A	#N/A	N/A	3383	Homo sapiens	#N/A	0.000707206	0.0133982	1.71842	0.781082	394399	409377	363245	321867	259420	196006	195652	217601
P49915	29	28	29	28	450.771	76715	44.59	GMP synthase [glutamine-hydrolyzing]	GMPS	#N/A	#N/A	Carbamidomethylation; Oxidation (M)	452	Homo sapiens	#N/A	0.00375332	0.0316508	1.71743	0.78025	8033060	9390990	7455420	7810210	3547290	5669600	4598510	5459420
Q6UW63	19	19	17	17	390.218	58043	40.24	Protein O-glucosyltransferase 2	POGLUT2	#N/A	#N/A	Carbamidomethylation; Oxidation (M)	923	Homo sapiens	#N/A	0.00974854	0.0550649	1.71518	0.778356	4696140	3007180	2923360	3023700	1686720	2326090	1653930	2222810
Q9BTV4	23	23	23	23	428.491	44876	61.25	Transmembrane protein 43	TMEM43	#N/A	#N/A	Acetylation (Protein N-term)	686	Homo sapiens	#N/A	0.00634198	0.0433744	1.70551	0.770207	20900000	15200000	20000000	12900000	9153700	11900000	9628070	9236410
P25205	52	52	52	52	525.831	90981	60.02	DNA replication licensing factor MCM3	MCM3	#N/A	#N/A	Acetylation (Protein N-term); Carbamidomethylation; Deamidation (NQ); Oxidation (M)	130	Homo sapiens	#N/A	0.0071985	0.0457899	1.70079	0.766203	39300000	37500000	33500000	32700000	20700000	28000000	15200000	21900000
P04632	7	7	7	7	281.187	28316	32.84	Calpain small subunit 1	CAPNS1	#N/A	#N/A	Carbamidomethylation; Oxidation (M)	2454	Homo sapiens	#N/A	0.00300269	0.0275258	1.68048	0.748876	2305480	2140960	1747500	1705350	1390360	1201000	950335	1162300
P62861	3	3	3	3	203.683	14390	9.02	FAU ubiquitin-like and ribosomal protein S30	FAU	#N/A	#N/A	N/A	3487	Homo sapiens	#N/A	0.00992688	0.0555221	1.66808	0.738189	1030780	885303	596271	648719	508660	449798	408008	488402
O94979	26	26	26	26	430.69	133015	23.69	Protein transport protein Sec31A	SEC31A	#N/A	#N/A	Carbamidomethylation; Oxidation (M)	555	Homo sapiens	#N/A	0.00586004	0.0416256	1.65068	0.723061	8109900	7934300	5281480	6912540	4713600	4482250	3456830	4332510
P11172	22	22	22	22	408.29	52222	45	Uridine 5'-monophosphate synthase	UMPS	#N/A	#N/A	Carbamidomethylation	687	Homo sapiens	#N/A	0.007754	0.0479182	1.65058	0.722976	9323350	10700000	6975360	9296800	4891380	6459140	4448350	6201580
P46459	37	37	37	37	481.563	82594	46.77	Vesicle-fusing ATPase	NSF	#N/A	#N/A	Carbamidomethylation; Oxidation (M)	310	Homo sapiens	#N/A	0.00753099	0.0470438	1.6489	0.7215	20200000	24700000	17000000	22800000	11600000	10300000	16100000	13600000
P43246	38	37	38	37	480.08	104743	46.47	DNA mismatch repair protein Msh2	MSH2	#N/A	#N/A	Carbamidomethylation; Oxidation (M)	277	Homo sapiens	#N/A	0.00432017	0.0346888	1.64823	0.72092	19700000	26500000	17300000	25000000	11500000	13700000	13300000	14600000
Q9UBQ5	4	4	4	4	219.978	25060	24.31	Eukaryotic translation initiation factor 3 subunit K	EIF3K	#N/A	#N/A	Carbamidomethylation	3111	Homo sapiens	#N/A	0.00378032	0.0317535	1.64425	0.717432	2584690	2605580	2023290	2686800	1445240	1893620	1248370	1466080
Q9Y4R8	18	18	18	18	383.788	91747	27	Telomere length regulation protein TEL2 homolog	TELO2	#N/A	#N/A	Carbamidomethylation	994	Homo sapiens	#N/A	0.00665721	0.0445904	1.64332	0.716611	3096430	3627300	2424700	3129540	1690270	2416700	1663380	1719990
Q5SW79	9	9	9	9	283.803	175293	6.57	Centrosomal protein of 170 kDa	CEP170	#N/A	#N/A	Acetylation (Protein N-term)	1986	Homo sapiens	#N/A	0.00456196	0.0359895	1.64123	0.714774	2856380	1755300	2044590	2189890	1201370	1415190	1243040	1464010
Q00341	32	29	31	28	453.368	141456	25.24	Vigilin	HDLBP	#N/A	#N/A	Oxidation (M)	400	Homo sapiens	#N/A	0.00433694	0.0346888	1.63454	0.708888	8041750	8394370	5577480	6841600	4682480	3923560	3949860	4972920
Q9HB40	6	6	6	6	256.643	50831	13.5	Retinoid-inducible serine carboxypeptidase	SCPEP1	#N/A	#N/A	Carbamidomethylation	2596	Homo sapiens	#N/A	0.00682263	0.0446906	1.63353	0.707993	737320	603742	585726	448263	308297	409366	334372	388970
Q9HBM1	3	3	3	3	207.748	26153	20.09	Kinetochore protein Spc25	SPC25	#N/A	#N/A	N/A	3550	Homo sapiens	#N/A	0.00332757	0.029277	1.62756	0.702713	195996	196910	247998	154734	115709	122110	133431	111950
Q15393	44	43	44	43	498.169	135577	39.85	Splicing factor 3B subunit 3	SF3B3	#N/A	#N/A	Carbamidomethylation; Deamidation (NQ); Oxidation (M)	187	Homo sapiens	#N/A	0.00993065	0.0555221	1.62744	0.702604	24900000	23400000	20200000	25000000	16300000	18500000	10700000	13000000
Q12888	12	12	12	12	327.583	213574	7	TP53-binding protein 1	TP53BP1	#N/A	#N/A	Carbamidomethylation	1603	Homo sapiens	#N/A	0.0095883	0.0545172	1.62166	0.69747	2467020	2061280	2179630	2584850	1930370	1123340	1262840	1512830
Q9H6V9	11	11	11	11	339.758	37318	33.85	Lipid droplet-associated hydrolase	LDAH	#N/A	#N/A	Carbamidomethylation	1689	Homo sapiens	#N/A	0.00206311	0.0225567	1.61836	0.69453	2337410	2360760	1967230	1773610	1330860	1118340	1253200	1504800
P17655	21	19	21	19	414.315	79995	34	Calpain-2 catalytic subunit	CAPN2	#N/A	#N/A	Carbamidomethylation	828	Homo sapiens	#N/A	0.00910796	0.0532405	1.6052	0.682752	4478320	4591810	3133190	3952390	2032410	2382290	2530590	3130420
Q8WUM0	15	14	15	14	361.712	128979	16.18	Nuclear pore complex protein Nup133	NUP133	#N/A	#N/A	Carbamidomethylation	1299	Homo sapiens	#N/A	0.000161027	0.00671939	1.5951	0.673651	2487140	2517180	2781290	2289010	1514370	1770110	1496280	1535000
Q9UJA5	19	19	19	19	392.978	55799	42.25	tRNA (adenine(58)-N(1))-methyltransferase non-catalytic subunit TRM6	TRMT6	#N/A	#N/A	Carbamidomethylation; Oxidation (M)	896	Homo sapiens	#N/A	0.00300889	0.0275258	1.58308	0.662731	6202010	5033720	4081050	4871820	3054790	3357170	3397020	2836770
Q08170	17	17	11	11	380.753	56678	21.46	Serine/arginine-rich splicing factor 4	SRSF4	#N/A	#N/A	Deamidation (NQ); Oxidation (M)	929	Homo sapiens	#N/A	0.000525884	0.0113851	1.58161	0.661395	4187290	3994440	4300450	4659000	2259960	2880190	2894860	2842150
Q9GZR7	12	11	12	11	344.986	96332	14.9	ATP-dependent RNA helicase DDX24	DDX24	#N/A	#N/A	Carbamidomethylation	1552	Homo sapiens	#N/A	0.00668702	0.0446515	1.55533	0.637222	1218870	1309490	1091140	1364600	659971	846819	711564	1021240
P21912	10	10	10	10	316.383	31630	31.79	Succinate dehydrogenase [ubiquinone] iron-sulfur subunit, mitochondrial	SDHB	OXPHOS > Complex II > CII subunits | Metabolism > Carbohydrate metabolism > TCA cycle | Metabolism > Metals and cofactors > Fe-S-containing proteins | OXPHOS > OXPHOS subunits	MIM	Carbamidomethylation	1914	Homo sapiens	Tmito	0.00995098	0.0555221	1.54614	0.628675	10100000	9975220	6678770	7359970	5044040	5933360	4888850	5922870
Q9NV70	16	16	16	16	372.362	101982	18.46	Exocyst complex component 1	EXOC1	#N/A	#N/A	Carbamidomethylation	1148	Homo sapiens	#N/A	0.00217429	0.0232716	1.53629	0.619448	4043510	3959350	3618100	3260340	2171480	2943680	2334920	2271530
Q9BZX2	7	7	7	7	279.343	29299	39.08	Uridine-cytidine kinase 2	UCK2	#N/A	#N/A	Acetylation (Protein N-term); Carbamidomethylation; Deamidation (NQ)	2244	Homo sapiens	#N/A	0.00465867	0.0366291	1.51921	0.603325	1936480	1614520	1831770	1281790	1070960	1035220	1062200	1170180
Q9UIG0	44	43	44	43	495.417	170903	34.59	Tyrosine-protein kinase BAZ1B	BAZ1B	#N/A	#N/A	Carbamidomethylation; Oxidation (M)	205	Homo sapiens	#N/A	0.0061116	0.0426416	1.51484	0.599161	11900000	12300000	8850650	9634670	7275800	5914440	6988800	7881450
Q02252	20	20	20	20	397.816	57840	36.64	Methylmalonate-semialdehyde dehydrogenase [acylating], mitochondrial	ALDH6A1	Metabolism > Amino acid metabolism > Branched-chain amino acid metabolism	MIM	Carbamidomethylation; Oxidation (M)	873	Homo sapiens	Tmito	0.00272665	0.0263468	1.49312	0.578326	5421940	4855140	3758100	4533490	3240630	3005630	2881170	3215500
P11498	35	34	35	34	477.975	129634	36.33	Pyruvate carboxylase, mitochondrial	PC	Metabolism > Carbohydrate metabolism > Gluconeogenesis | Metabolism > Carbohydrate metabolism > TCA-associated | Metabolism > Vitamin metabolism > Biotin utilizing proteins	Matrix	Carbamidomethylation; Deamidation (NQ); Oxidation (M)	309	Homo sapiens	Tmito	0.00505335	0.0379031	1.45846	0.544446	8263590	8914040	8084790	8197300	5207880	6276020	4772000	6917660
O96011	10	10	10	10	334.374	28431	39	Peroxisomal membrane protein 11B	PEX11B	0	Membrane	Carbamidomethylation	1835	Homo sapiens	Tpossible_mito	0.00676511	0.0446515	1.4312	0.517227	3400720	2523020	2855250	2461380	2214750	1926240	1745430	1930060
Q15020	28	28	28	28	442.309	109935	29.08	Squamous cell carcinoma antigen recognized by T-cells 3	SART3	#N/A	#N/A	Acetylation (Protein N-term); Carbamidomethylation; Deamidation (NQ)	498	Homo sapiens	#N/A	0.0075417	0.047054	1.40783	0.493478	6377830	6334870	5037420	5527200	3888280	4886680	4187780	3598830
Q7Z6Z7	77	74	77	74	562.15	481891	20.3	E3 ubiquitin-protein ligase HUWE1	HUWE1	#N/A	#N/A	Carbamidomethylation; Deamidation (NQ); Oxidation (M)	47	Homo sapiens	#N/A	0.00837357	0.0504068	1.40697	0.492592	14600000	15800000	16200000	19100000	10500000	13900000	12000000	10400000
Q96HS1	15	15	15	15	366.529	32004	57.09	Serine/threonine-protein phosphatase PGAM5, mitochondrial	PGAM5	Mitochondrial dynamics and surveillance > Mitophagy | Mitochondrial dynamics and surveillance > Autophagy	MOM	Carbamidomethylation; Deamidation (NQ); Oxidation (M)	1140	Homo sapiens	Tmito	0.00909962	0.0532405	1.39356	0.478773	13700000	12100000	12300000	11400000	7634480	9767890	7871310	10500000
Q92621	43	42	43	42	487.605	227922	24.8	Nuclear pore complex protein Nup205	NUP205	#N/A	#N/A	Acetylation (Protein N-term); Carbamidomethylation; Deamidation (NQ); Oxidation (M)	209	Homo sapiens	#N/A	0.00578804	0.0413284	1.36953	0.45368	5540880	6163050	6000790	6489170	4736410	3641840	4942600	4433670
Q92520	7	6	7	6	283.39	24680	25.99	Protein FAM3C	FAM3C	#N/A	#N/A	Carbamidomethylation	2445	Homo sapiens	#N/A	0.00231389	0.0242655	1.36802	0.45209	1989580	2253530	2146370	2451470	1433940	1581810	1734750	1711840
P62081	15	15	15	15	384.385	22127	67.53	40S ribosomal protein S7	RPS7	#N/A	#N/A	Deamidation (NQ); Oxidation (M)	978	Homo sapiens	#N/A	0.00723721	0.045871	0.719206	-0.475524	93600000	113000000	85600000	86900000	116000000	150000000	130000000	130000000
P19823	12	12	12	12	334.734	106463	11.84	Inter-alpha-trypsin inhibitor heavy chain H2	ITIH2	#N/A	#N/A	Deamidation (NQ); Oxidation (M)	1476	Homo sapiens	#N/A	0.00925351	0.0534911	0.665973	-0.586463	24500000	21700000	25000000	19000000	32400000	42100000	27600000	34100000
P02753	4	4	4	4	217.557	23010	13.43	Retinol-binding protein 4	RBP4	#N/A	#N/A	Carbamidomethylation	3279	Homo sapiens	#N/A	3.83088e-05	0.00249217	0.627711	-0.671828	594287	681277	612993	586737	923831	1015910	960327	1040660
O60313	21	21	21	21	401.714	111631	23.23	Dynamin-like 120 kDa protein, mitochondrial	OPA1	Mitochondrial dynamics and surveillance > Fusion | Mitochondrial dynamics and surveillance > Cristae formation	MIM	Carbamidomethylation	790	Homo sapiens	Tmito	0.00206404	0.0225567	0.602863	-0.730098	3258510	3409840	2734110	2448890	4131460	4975150	5518720	4964960
P02675	4	4	4	4	218.423	55928	6.52	Fibrinogen beta chain	FGB	#N/A	#N/A	Carbamidomethylation	3319	Homo sapiens	#N/A	0.000178343	0.00712136	0.591695	-0.757073	2826510	3186620	2790990	2607670	4701400	5469950	4324250	4809270
P55786	32	32	32	32	451.93	103276	35.8	Puromycin-sensitive aminopeptidase	NPEPPS	#N/A	#N/A	Carbamidomethylation; Oxidation (M)	391	Homo sapiens	#N/A	0.00483286	0.0371838	0.588681	-0.764441	16000000	13100000	11900000	11500000	23400000	25200000	24400000	16600000
Q9ULD0	13	13	3	3	344.153	114481	2.57	2-oxoglutarate dehydrogenase-like, mitochondrial	OGDHL	Metabolism > Carbohydrate metabolism > TCA cycle	Matrix	Carbamidomethylation	1441	Homo sapiens	Tmito	0.00240583	0.02473	0.572007	-0.805895	642514	575702	432233	453258	906143	822332	850467	1068160
P15531	8	8	5	5	309.517	17149	26.97	Nucleoside diphosphate kinase A	NME1	#N/A	#N/A	Oxidation (M)	1813	Homo sapiens	#N/A	0.00752841	0.0470438	0.568108	-0.815764	7233360	4479550	5387890	4758340	10400000	11400000	7333800	9171880
Q9UNP9	3	3	3	3	157.192	33431	9.97	Peptidyl-prolyl cis-trans isomerase E	PPIE	#N/A	#N/A	N/A	3496	Homo sapiens	#N/A	0.00977938	0.0551357	0.56705	-0.818452	322492	218825	284150	186183	441169	459214	520659	342328
Q5VYS8	7	7	6	6	269.797	171229	4.88	Terminal uridylyltransferase 7	TUT7	#N/A	#N/A	Carbamidomethylation	2408	Homo sapiens	#N/A	0.00572969	0.0410246	0.562909	-0.829026	520019	641882	426407	550432	1178700	1050390	720179	875093
P80404	11	11	11	11	324.304	56439	29.4	4-aminobutyrate aminotransferase, mitochondrial	ABAT	Metabolism > Amino acid metabolism > GABA metabolism | Metabolism > Metals and cofactors > Fe-S-containing proteins	Matrix	Carbamidomethylation	1713	Homo sapiens	Tmito	0.00820324	0.0499215	0.560975	-0.833992	733856	621850	695347	754768	1297170	1831250	955298	1065750
P47756	18	17	18	17	391.814	30629	56.25	F-actin-capping protein subunit beta	CAPZB	#N/A	#N/A	Acetylation (Protein N-term); Carbamidomethylation; Deamidation (NQ); Oxidation (M)	703	Homo sapiens	#N/A	0.00663096	0.0445295	0.548234	-0.867136	5766850	4483130	4205170	3754950	9778120	9383200	5850890	8418110
Q9UIW2	28	28	23	23	420.962	211067	14.29	Plexin-A1	PLXNA1	#N/A	#N/A	Carbamidomethylation	518	Homo sapiens	#N/A	0.00705786	0.0452872	0.545168	-0.875227	2741220	2640280	4184300	3190500	5201900	6411350	7330540	4474100
P09543	32	32	31	31	465.064	47579	54.87	2',3'-cyclic-nucleotide 3'-phosphodiesterase	CNP	#N/A	#N/A	Carbamidomethylation; Deamidation (NQ); Oxidation (M)	297	Homo sapiens	#N/A	0.00373535	0.0315801	0.53402	-0.905035	26200000	24800000	22000000	19500000	48600000	55700000	32300000	39200000
Q01433	3	3	3	3	156.621	100688	3.41	AMP deaminase 2	AMPD2	#N/A	#N/A	N/A	3671	Homo sapiens	#N/A	0.00227153	0.0240643	0.52741	-0.923004	382034	371690	323652	261425	561554	823650	564735	594480
Q01974	14	14	13	13	357.289	104757	14.95	Tyrosine-protein kinase transmembrane receptor ROR2	ROR2	#N/A	#N/A	Carbamidomethylation	1309	Homo sapiens	#N/A	0.00675129	0.0446515	0.515549	-0.955817	2262580	2121690	1896590	1409210	3709880	4827640	2626650	3860610
P78417	8	8	8	8	284.278	27566	33.2	Glutathione S-transferase omega-1	GSTO1	#N/A	#N/A	Carbamidomethylation	2334	Homo sapiens	#N/A	0.00908556	0.0532315	0.504704	-0.98649	1700990	1214990	1090310	961781	2810330	3015050	1663910	2369050
Q14624	5	5	5	5	247.879	103357	5.7	Inter-alpha-trypsin inhibitor heavy chain H4	ITIH4	#N/A	#N/A	Oxidation (M)	2682	Homo sapiens	#N/A	0.00239544	0.02473	0.500018	-0.999949	3888320	4557960	4402250	3735970	8287420	11800000	6444470	7399140
P02765	6	6	6	6	265.795	39341	11.44	Alpha-2-HS-glycoprotein	AHSG	#N/A	#N/A	Carbamidomethylation; Deamidation (NQ)	2774	Homo sapiens	#N/A	0.00048147	0.0113091	0.491152	-1.02576	271000000	336000000	248000000	238000000	455000000	637000000	566000000	563000000
P10114	7	7	3	3	288.475	20615	15.3	Ras-related protein Rap-2a	RAP2A	#N/A	#N/A	Oxidation (M)	2447	Homo sapiens	#N/A	0.0043266	0.0346888	0.490416	-1.02792	232781	166764	199255	179557	474915	458623	257727	427730
P01024	14	14	14	14	368.347	187148	8.36	Complement C3	C3	#N/A	#N/A	Carbamidomethylation; Oxidation (M)	1255	Homo sapiens	#N/A	0.00153187	0.0198608	0.490063	-1.02896	12700000	18200000	17200000	17300000	31400000	44000000	27400000	31500000
P11234	13	12	8	8	357.615	23409	25.24	Ras-related protein Ral-B	RALB	#N/A	#N/A	Deamidation (NQ)	1178	Homo sapiens	#N/A	0.00483511	0.0371838	0.466042	-1.10147	1736880	1542710	1451420	970010	3098730	3990760	2202890	2935560
Q9UHD1	5	5	5	5	233.052	37490	18.98	Cysteine and histidine-rich domain-containing protein 1	CHORDC1	#N/A	#N/A	Acetylation (Protein N-term); Carbamidomethylation	2881	Homo sapiens	#N/A	0.00675565	0.0446515	0.465743	-1.10239	476707	358773	233350	337252	529611	938725	758530	758546
P02768	42	41	42	41	483.922	69367	67.32	Albumin	ALB	#N/A	#N/A	Carbamidomethylation; Deamidation (NQ); Oxidation (M)	180	Homo sapiens	#N/A	0.00481197	0.037171	0.465436	-1.10335	520000000	447000000	509000000	321000000	1310000000	1060000000	822000000	709000000
Q16352	31	28	27	25	448.557	55391	53.11	Alpha-internexin	INA	#N/A	#N/A	Acetylation (Protein N-term); Carbamidomethylation	369	Homo sapiens	#N/A	0.00740043	0.0465999	0.463788	-1.10846	10200000	5575060	7366640	6004160	13800000	22900000	14100000	12200000
Q9Y376	6	5	6	5	248.278	39869	14.08	Calcium-binding protein 39	CAB39	#N/A	#N/A	N/A	2585	Homo sapiens	#N/A	0.00102077	0.0159602	0.453414	-1.1411	663503	408247	670337	465582	1200190	1336460	1081190	1153370
P31641	5	5	4	4	238.529	69830	6.61	Sodium- and chloride-dependent taurine transporter	SLC6A6	#N/A	#N/A	N/A	2979	Homo sapiens	#N/A	0.00316215	0.0283939	0.451205	-1.14815	405058	609650	383450	328268	1000390	1205730	774942	802319
P41217	4	4	4	4	208.123	31264	23.38	OX-2 membrane glycoprotein	CD200	#N/A	#N/A	Carbamidomethylation; Oxidation (M)	2878	Homo sapiens	#N/A	0.00896975	0.0528753	0.43903	-1.18761	555649	428957	420809	346835	1186330	1548570	748212	681214
P55011	15	14	15	14	355.429	131447	13.7	Solute carrier family 12 member 2	SLC12A2	#N/A	#N/A	Carbamidomethylation; Oxidation (M)	1217	Homo sapiens	#N/A	0.00147705	0.0197072	0.438482	-1.18941	1272470	900787	1205150	875764	2254430	2991420	2715590	1786950
Q7L9L4	3	3	3	3	194.304	25091	16.2	MOB kinase activator 1B	MOB1B	#N/A	#N/A	N/A	3748	Homo sapiens	#N/A	0.0054676	0.0395848	0.4359	-1.19793	606760	356349	482180	272881	894417	1211610	794472	915265
P04114	16	16	16	16	375.627	515605	3.22	Apolipoprotein B-100	APOB	#N/A	#N/A	Deamidation (NQ)	1093	Homo sapiens	#N/A	0.00984143	0.0554088	0.435595	-1.19894	3184890	3161860	4264040	3330590	10500000	11500000	4528720	7264180
O43427	13	12	13	12	334.579	41878	39.29	Acidic fibroblast growth factor intracellular-binding protein	FIBP	#N/A	#N/A	Carbamidomethylation; Oxidation (M)	1484	Homo sapiens	#N/A	0.00370147	0.0314311	0.435347	-1.19976	2236860	1797310	2092400	1363970	4399810	5965340	4110210	2960960
O95445	3	3	3	3	177.558	21253	10.64	Apolipoprotein M	APOM	#N/A	#N/A	Carbamidomethylation	3462	Homo sapiens	#N/A	0.00151279	0.0197806	0.434857	-1.20139	1760400	2694470	2939410	2377260	4121770	5744410	6608920	5923460
Q9BSQ5	10	10	10	10	315.364	48837	28.83	Cerebral cavernous malformations 2 protein	CCM2	#N/A	#N/A	Carbamidomethylation	1807	Homo sapiens	#N/A	0.00353085	0.0305477	0.433807	-1.20487	1449030	1053290	888865	723181	1974350	2681430	2802150	1867400
P21397	14	14	14	14	335.382	59682	29.6	Amine oxidase [flavin-containing] A	MAOA	Metabolism > Amino acid metabolism > Catechol metabolism | Metabolism > Detoxification > Xenobiotic metabolism	MOM	Carbamidomethylation; Oxidation (M)	1380	Homo sapiens	Tmito	0.00712665	0.0455597	0.431977	-1.21097	2723650	1650970	3271880	2865830	5174050	6311530	4319630	8583910
Q9NQX3	4	4	4	4	220.292	79748	6.79	Gephyrin	GPHN	#N/A	#N/A	Carbamidomethylation	3370	Homo sapiens	#N/A	0.00614846	0.0428412	0.431806	-1.21155	286861	227919	250010	243374	814069	815372	382218	451027
Q86W92	11	11	11	11	302.747	114024	10.48	Liprin-beta-1	PPFIBP1	#N/A	#N/A	Carbamidomethylation	1699	Homo sapiens	#N/A	0.00832943	0.0502663	0.429998	-1.2176	449565	562778	276932	513030	1155060	1453860	828860	755390
P20618	6	6	6	6	251.041	26489	32.78	Proteasome subunit beta type-1	PSMB1	#N/A	#N/A	Carbamidomethylation; Oxidation (M)	2567	Homo sapiens	#N/A	0.00178499	0.0212265	0.427521	-1.22593	2088380	1342720	1736140	2019420	4397400	4383200	5232160	2918180
P07996	24	24	23	23	420.48	129383	20.6	Thrombospondin-1	THBS1	#N/A	#N/A	Carbamidomethylation; Oxidation (M)	662	Homo sapiens	#N/A	0.000764643	0.0139763	0.426942	-1.22789	2057580	2115840	2572030	2098640	5725190	6862510	3841310	4686270
P00492	9	9	9	9	317.982	24579	49.54	Hypoxanthine-guanine phosphoribosyltransferase	HPRT1	#N/A	#N/A	Carbamidomethylation; Oxidation (M)	1678	Homo sapiens	#N/A	0.0058712	0.0416256	0.421968	-1.24479	1690130	1245360	1223990	678701	2853880	3309490	2267250	2575470
P62258	27	27	24	24	447.106	29174	71.37	14-3-3 protein epsilon	YWHAE	#N/A	#N/A	Acetylation (Protein N-term); Carbamidomethylation; Deamidation (NQ); Oxidation (M)	341	Homo sapiens	#N/A	0.00956779	0.0545172	0.419004	-1.25496	36300000	19500000	23100000	15400000	66100000	70400000	38500000	45600000
P07948	30	30	27	27	457.079	58574	59.38	Tyrosine-protein kinase Lyn	LYN	#N/A	#N/A	Carbamidomethylation; Deamidation (NQ); Oxidation (M)	274	Homo sapiens	#N/A	0.00927534	0.0534981	0.417625	-1.25972	13200000	12100000	11700000	8930460	31000000	43000000	15300000	26900000
O75608	3	3	3	3	187.247	24670	16.52	Acyl-protein thioesterase 1	LYPLA1	Metabolism > Lipid metabolism | Signaling	unknown	Carbamidomethylation	3469	Homo sapiens	Tpossible_mito	0.00921181	0.0534883	0.410091	-1.28598	243112	383169	151557	172859	715648	592760	461562	440693
P62834	13	13	3	3	361.794	20987	19.02	Ras-related protein Rap-1A	RAP1A	#N/A	#N/A	Carbamidomethylation; Oxidation (M)	1305	Homo sapiens	#N/A	0.00406519	0.0336073	0.406596	-1.29833	952430	875268	821543	663149	2498900	2955960	1304830	1724100
P51153	11	9	8	7	337.916	22774	35.96	Ras-related protein Rab-13	RAB13	#N/A	#N/A	Deamidation (NQ); Oxidation (M)	1440	Homo sapiens	#N/A	0.00765584	0.0476517	0.406277	-1.29946	2117470	1081740	1330980	912844	3388560	4281160	2191640	3212750
Q96PY5	26	26	21	21	421.229	123321	18.14	Formin-like protein 2	FMNL2	#N/A	#N/A	Carbamidomethylation; Oxidation (M)	538	Homo sapiens	#N/A	0.000206305	0.00750615	0.398418	-1.32765	2496610	2619560	2064450	1919860	7292760	5546680	4894430	5196000
O95865	15	15	14	14	370.139	29644	57.54	N(G),N(G)-dimethylarginine dimethylaminohydrolase 2	DDAH2	#N/A	#N/A	Carbamidomethylation; Oxidation (M)	1249	Homo sapiens	#N/A	0.0099332	0.0555221	0.396057	-1.33622	4737570	2600080	3277300	2169920	9078090	11700000	5013100	6686320
Q9NY47	32	31	31	30	465.757	129817	29.65	Voltage-dependent calcium channel subunit alpha-2/delta-2	CACNA2D2	#N/A	#N/A	Carbamidomethylation; Deamidation (NQ); Oxidation (M)	377	Homo sapiens	#N/A	0.00675388	0.0446515	0.395941	-1.33664	10600000	8856920	8264730	5005540	23400000	29000000	16400000	14200000
Q8N9I0	8	7	5	4	279.846	46872	10.5	Synaptotagmin-2	SYT2	#N/A	#N/A	Carbamidomethylation	2136	Homo sapiens	#N/A	0.00511411	0.0381427	0.393889	-1.34414	221367	497613	296703	266051	883630	989566	759411	544004
Q99715	14	14	14	14	325.191	333147	5.13	Collagen alpha-1(XII) chain	COL12A1	#N/A	#N/A	N/A	1312	Homo sapiens	#N/A	0.00469345	0.0366371	0.392287	-1.35002	737973	581047	885048	800760	3024390	2136220	1215020	1634710
P61586	14	14	4	4	373.557	21768	15.03	Transforming protein RhoA	RHOA	#N/A	#N/A	Carbamidomethylation; Oxidation (M)	1071	Homo sapiens	#N/A	0.00672702	0.0446515	0.386206	-1.37256	4085310	2173970	3010160	1813020	8051260	8671180	4415660	7067320
Q14344	27	26	25	24	446.345	44050	60.74	Guanine nucleotide-binding protein subunit alpha-13	GNA13	#N/A	#N/A	Carbamidomethylation; Deamidation (NQ); Oxidation (M)	450	Homo sapiens	#N/A	0.00484984	0.0372419	0.385491	-1.37523	16200000	14400000	13100000	8672030	37200000	50600000	23100000	27600000
Q16623	14	14	13	13	365.279	33023	42.01	Syntaxin-1A	STX1A	#N/A	#N/A	Oxidation (M)	1137	Homo sapiens	#N/A	0.00624881	0.0431925	0.381267	-1.39113	5088730	4510800	3388470	2223990	10100000	14000000	7562560	7655330
Q9UPZ6	43	42	43	42	470.259	185363	31.74	Thrombospondin type-1 domain-containing protein 7A	THSD7A	#N/A	#N/A	Carbamidomethylation; Deamidation (NQ); Oxidation (M)	171	Homo sapiens	#N/A	0.00170012	0.0210126	0.380348	-1.39461	7692270	6604250	6049270	5453890	18200000	23500000	10700000	17500000
P07947	14	14	4	4	365.166	60801	9.02	Tyrosine-protein kinase Yes	YES1	#N/A	#N/A	Carbamidomethylation	1335	Homo sapiens	#N/A	0.00808112	0.0494683	0.378752	-1.40068	321621	240960	554864	212839	788919	1115530	593098	852059
Q8IVB5	10	10	10	10	301.665	36563	27	LIX1-like protein	LIX1L	#N/A	#N/A	N/A	1874	Homo sapiens	#N/A	0.00895159	0.0528643	0.37814	-1.40301	1855340	861822	1831700	805158	3025090	4072490	3777570	2478300
O14578	79	74	79	74	548.708	231431	40.11	Citron Rho-interacting kinase	CIT	#N/A	#N/A	Carbamidomethylation; Deamidation (NQ); Oxidation (M)	48	Homo sapiens	#N/A	0.00175127	0.0211905	0.374833	-1.41568	12000000	7977760	16500000	9405960	30000000	34800000	22600000	31900000
P11233	11	10	6	6	345.646	23567	23.3	Ras-related protein Ral-A	RALA	#N/A	#N/A	N/A	1510	Homo sapiens	#N/A	0.00710609	0.0454892	0.373113	-1.42232	12600000	8660100	10600000	6051020	30900000	36700000	16500000	19300000
P58107	52	49	46	43	466.115	555658	11.71	Epiplakin	EPPK1	#N/A	#N/A	Carbamidomethylation; Deamidation (NQ)	145	Homo sapiens	#N/A	0.00414352	0.0340332	0.365449	-1.45226	2542110	1604590	2964830	1885320	9805930	5977320	4850240	4496510
Q96F85	7	7	7	7	284.668	18648	58.54	CB1 cannabinoid receptor-interacting protein 1	CNRIP1	#N/A	#N/A	Acetylation (Protein N-term); Carbamidomethylation	2484	Homo sapiens	#N/A	0.00344119	0.0299316	0.357775	-1.48288	1423630	932444	1240560	720953	3254020	3966600	1867520	3006080
P48163	6	6	6	6	234.54	64150	11.71	NADP-dependent malic enzyme	ME1	#N/A	#N/A	Carbamidomethylation	2648	Homo sapiens	#N/A	0.000962112	0.0158708	0.357774	-1.48288	244281	209939	291782	165731	897853	567641	559950	530374
P32119	17	17	16	16	388.349	21892	59.6	Peroxiredoxin-2	PRDX2	Metabolism > Detoxification > ROS and glutathione metabolism	unknown	Carbamidomethylation	1045	Homo sapiens	Tmito	0.0082997	0.0502105	0.353715	-1.49934	20300000	10800000	19600000	7653160	44500000	46100000	26600000	38500000
Q9H4G4	5	5	5	5	260.599	17218	46.1	Golgi-associated plant pathogenesis-related protein 1	GLIPR2	#N/A	#N/A	Carbamidomethylation	3050	Homo sapiens	#N/A	0.00683431	0.0446906	0.352625	-1.50379	1315090	1196610	1127540	645292	2978170	4939570	1846340	2726410
P02649	15	15	15	15	358.993	36154	49.53	Apolipoprotein E	APOE	#N/A	#N/A	Oxidation (M)	1149	Homo sapiens	#N/A	8.93351e-05	0.00459147	0.34385	-1.54015	3784850	3095950	2731430	2308240	7802050	9708690	8019020	8700570
Q02241	53	52	53	52	523.342	110059	57.6	Kinesin-like protein KIF23	KIF23	#N/A	#N/A	Carbamidomethylation; Deamidation (NQ); Oxidation (M)	89	Homo sapiens	#N/A	0.000969187	0.0158708	0.341067	-1.55187	48400000	27900000	44800000	35100000	144000000	130000000	80600000	104000000
Q9H4G0	9	9	8	8	300.387	98503	11.46	Band 4.1-like protein 1	EPB41L1	#N/A	#N/A	Carbamidomethylation	1970	Homo sapiens	#N/A	0.00662214	0.0445279	0.339075	-1.56032	213472	334359	170936	393867	918893	1194980	544259	608313
P63096	19	18	9	9	406.309	40361	24.29	Guanine nucleotide-binding protein G(i) subunit alpha-1	GNAI1	#N/A	#N/A	Carbamidomethylation	816	Homo sapiens	#N/A	0.00170588	0.0210338	0.335734	-1.57461	3792380	3826640	2686650	2544360	10900000	13300000	5957760	9040180
Q12860	55	55	55	55	532.43	113320	56.88	Contactin-1	CNTN1	#N/A	#N/A	Carbamidomethylation; Deamidation (NQ); Oxidation (M)	56	Homo sapiens	#N/A	0.00609307	0.0426268	0.330386	-1.59778	48100000	48200000	39800000	23400000	149000000	182000000	82400000	81100000
Q9ULK5	14	14	14	14	359.249	59714	36.28	Vang-like protein 2	VANGL2	#N/A	#N/A	Oxidation (M)	1234	Homo sapiens	#N/A	0.00830877	0.0502105	0.323806	-1.6268	1752600	1587330	1591040	707676	4588770	6627660	2540990	3686920
Q96FZ7	6	6	6	6	270.058	23485	32.84	Charged multivesicular body protein 6	CHMP6	#N/A	#N/A	Carbamidomethylation; Oxidation (M)	2421	Homo sapiens	#N/A	0.00691686	0.0448282	0.311066	-1.68471	2881380	1834440	1346530	802391	5567010	6259020	3800510	4606010
Q9Y4F1	42	42	42	42	484.218	118633	47.85	FERM, ARHGEF and pleckstrin domain-containing protein 1	FARP1	#N/A	#N/A	Acetylation (Protein N-term); Carbamidomethylation; Oxidation (M)	211	Homo sapiens	#N/A	0.000964279	0.0158708	0.309158	-1.69358	9920130	9267860	11500000	7940650	33500000	44800000	18900000	32400000
Q14642	4	4	4	4	170.708	47820	8.74	Inositol polyphosphate-5-phosphatase A	INPP5A	#N/A	#N/A	Carbamidomethylation	3158	Homo sapiens	#N/A	0.000835745	0.0146566	0.307352	-1.70204	273336	180812	298423	321496	700760	1134980	1041390	641539
P63000	11	11	5	5	345.029	21450	26.56	Ras-related C3 botulinum toxin substrate 1	RAC1	#N/A	#N/A	Carbamidomethylation; Oxidation (M)	1449	Homo sapiens	#N/A	0.0025726	0.0255881	0.303178	-1.72176	7050340	5391750	6527510	3235970	18200000	25800000	11500000	17600000
Q9H0H5	39	38	39	38	490.072	71027	57.91	Rac GTPase-activating protein 1	RACGAP1	#N/A	#N/A	Acetylation (Protein N-term); Carbamidomethylation; Deamidation (NQ); Oxidation (M)	188	Homo sapiens	#N/A	0.0052849	0.0389303	0.301544	-1.72956	47000000	23400000	39200000	18900000	122000000	148000000	66400000	82200000
O14936	35	35	35	35	456.297	105123	37.69	Peripheral plasma membrane protein CASK	CASK	#N/A	#N/A	Carbamidomethylation; Deamidation (NQ); Oxidation (M)	327	Homo sapiens	#N/A	0.0052919	0.0389303	0.300259	-1.73572	11300000	4954120	9515020	3959100	22000000	32500000	19200000	18900000
Q9NVA2	25	25	13	13	424.924	49398	33.57	Septin-11	SEPTIN11	#N/A	#N/A	Acetylation (Protein N-term); Carbamidomethylation; Deamidation (NQ)	493	Homo sapiens	#N/A	0.000609069	0.0123491	0.28661	-1.80284	2282830	2055570	2970240	1442570	7475200	10200000	6692330	5839380
P53794	3	3	3	3	174.907	79664	4.32	Sodium/myo-inositol cotransporter	SLC5A3	#N/A	#N/A	Carbamidomethylation	3799	Homo sapiens	#N/A	0.0014898	0.0197072	0.283273	-1.81973	240705	87598.5	160620	110954	487550	533274	536861	418089
Q92817	45	44	45	44	449.174	231604	26.17	Envoplakin	EVPL	#N/A	#N/A	Carbamidomethylation	202	Homo sapiens	#N/A	0.00689099	0.0447853	0.278499	-1.84426	2450770	1845130	1997000	2300440	8818930	12000000	10600000	3078380
P62070	6	6	4	4	268.683	23400	20.1	Ras-related protein R-Ras2	RRAS2	#N/A	#N/A	Oxidation (M)	2433	Homo sapiens	#N/A	0.00135818	0.0188511	0.276841	-1.85287	488256	377508	463211	242487	1538300	1966860	900888	1293110
P62330	9	9	6	6	313.453	20082	44.57	ADP-ribosylation factor 6	ARF6	#N/A	#N/A	Carbamidomethylation; Oxidation (M)	1780	Homo sapiens	#N/A	0.000523507	0.0113851	0.274727	-1.86393	2741300	1534920	2394870	1453770	7208720	9277520	5464040	7037410
P18084	9	7	9	7	296.427	88054	9.64	Integrin beta-5	ITGB5	#N/A	#N/A	Carbamidomethylation	2016	Homo sapiens	#N/A	0.00813386	0.049674	0.27218	-1.87736	325854	756975	170586	355578	882652	1553090	1612350	1233420
P53350	14	14	14	14	336.488	68255	26.37	Serine/threonine-protein kinase PLK1	PLK1	#N/A	#N/A	Carbamidomethylation	1254	Homo sapiens	#N/A	0.00568329	0.0408049	0.269437	-1.89198	1258490	683649	717451	665580	3506810	4101180	1320140	4105880
P62993	10	10	10	10	314.237	25206	41.47	Growth factor receptor-bound protein 2	GRB2	#N/A	#N/A	Carbamidomethylation	1831	Homo sapiens	#N/A	0.00944938	0.0540218	0.266354	-1.90858	1963260	840362	1606570	450957	4124390	5289160	3224530	3376200
P17252	24	24	23	23	419.081	76750	38.84	Protein kinase C alpha type	PRKCA	#N/A	#N/A	Acetylation (Protein N-term); Carbamidomethylation; Oxidation (M)	513	Homo sapiens	#N/A	0.00963874	0.0546827	0.26487	-1.91664	6241820	2289820	1336940	2734980	8918900	13000000	6937770	13200000
O14829	6	6	6	6	221.79	75792	11.79	Serine/threonine-protein phosphatase with EF-hands 1	PPEF1	#N/A	#N/A	N/A	2744	Homo sapiens	#N/A	7.95826e-05	0.0042589	0.26098	-1.93799	128147	122847	197874	169235	554064	590660	480264	723011
Q9HCP0	9	9	5	5	293.96	48511	15.88	Casein kinase I isoform gamma-1	CSNK1G1	#N/A	#N/A	Carbamidomethylation	2006	Homo sapiens	#N/A	0.0018464	0.0214318	0.253908	-1.97762	95500.2	144082	183616	77805.5	423252	774119	368673	391546
Q8WUN7	5	5	5	5	221.431	26190	19.66	Ubiquitin domain-containing protein 2	UBTD2	#N/A	#N/A	Carbamidomethylation	3012	Homo sapiens	#N/A	0.00830534	0.0502105	0.244613	-2.03143	303907	100021	266219	93152.4	833969	977634	421656	612437
P09471	17	16	14	14	397.121	40051	38.7	Guanine nucleotide-binding protein G(o) subunit alpha	GNAO1	#N/A	#N/A	Carbamidomethylation; Oxidation (M)	760	Homo sapiens	#N/A	0.000543196	0.0115437	0.244517	-2.03199	11100000	10800000	7694780	6965850	41800000	55400000	24800000	31300000
P78347	46	45	46	45	501.742	112416	41.48	General transcription factor II-I	GTF2I	#N/A	#N/A	Acetylation (Protein N-term); Carbamidomethylation; Deamidation (NQ); Oxidation (M)	143	Homo sapiens	#N/A	0.000100793	0.00498301	0.241645	-2.04904	36300000	30200000	23300000	21000000	114000000	85900000	135000000	119000000
P60880	4	4	4	4	217.684	23315	26.7	Synaptosomal-associated protein 25	SNAP25	#N/A	#N/A	Oxidation (M)	2943	Homo sapiens	#N/A	0.00936623	0.0537833	0.240155	-2.05796	478974	208419	422287	114087	1215820	1722670	919455	750800
P29323	24	23	23	22	416.988	117493	26.07	Ephrin type-B receptor 2	EPHB2	#N/A	#N/A	Carbamidomethylation; Oxidation (M)	607	Homo sapiens	#N/A	0.0077696	0.0479513	0.237246	-2.07554	2644680	1444320	2089600	726338	8619000	10300000	3590340	5741350
P60484	3	3	3	3	168.247	47166	8.93	Phosphatidylinositol 3,4,5-trisphosphate 3-phosphatase and dual-specificity protein phosphatase PTEN	PTEN	#N/A	#N/A	N/A	3443	Homo sapiens	#N/A	4.64462e-05	0.00287026	0.236261	-2.08155	114411	133864	136459	107508	371004	608603	492844	648013
Q9UN36	6	6	5	5	256.431	40798	18.6	Protein NDRG2	NDRG2	#N/A	#N/A	Acetylation (Protein N-term)	2639	Homo sapiens	#N/A	0.00157462	0.0202323	0.233692	-2.09732	160350	240197	122430	135791	931343	1052080	424240	516475
Q9H8M5	8	8	6	6	295.252	96623	8	Metal transporter CNNM2	CNNM2	#N/A	#N/A	N/A	2245	Homo sapiens	#N/A	0.00433574	0.0346888	0.221853	-2.17233	170642	79126.2	97778.9	89190.1	733195	775044	226760	377222
Q14644	17	17	16	16	365.877	95699	24.1	Ras GTPase-activating protein 3	RASA3	#N/A	#N/A	Carbamidomethylation	1062	Homo sapiens	#N/A	0.00124494	0.017839	0.221135	-2.177	503730	436038	805613	505396	3219630	3690850	1323030	2378740
O43173	11	11	11	11	307.977	43970	32.63	Sia-alpha-2,3-Gal-beta-1,4-GlcNAc-R:alpha 2,8-sialyltransferase	ST8SIA3	#N/A	#N/A	Carbamidomethylation; Oxidation (M)	1776	Homo sapiens	#N/A	0.00677815	0.0446515	0.205902	-2.27997	914012	902604	1587050	497500	3515100	2552140	3775380	10700000
Q15223	3	3	3	3	175.618	57158	6.58	Nectin-1	NECTIN1	#N/A	#N/A	N/A	3478	Homo sapiens	#N/A	0.00990135	0.0555221	0.180686	-2.46844	439721	1409430	362460	2311980	4629880	6296380	3964670	4216000
P06213	5	5	4	4	243.497	156333	3.33	Insulin receptor	INSR	#N/A	#N/A	Carbamidomethylation	3092	Homo sapiens	#N/A	4.58615e-05	0.00286828	0.174566	-2.51816	75648	117888	75868.9	80899.4	510377	521465	641989	344981
O43602	18	18	16	16	387.561	40574	43.84	Neuronal migration protein doublecortin	DCX	#N/A	#N/A	Acetylation (Protein N-term); Carbamidomethylation	984	Homo sapiens	#N/A	3.57228e-05	0.00246231	0.174018	-2.52269	1102620	1053070	1435570	875905	4668290	6542390	6100390	8545450
P26038	46	46	32	32	491.867	67820	45.23	Moesin	MSN	#N/A	#N/A	Oxidation (M)	132	Homo sapiens	#N/A	0.00175188	0.0211905	0.173677	-2.52552	5266600	10500000	5326590	11700000	59700000	67600000	41900000	22400000
Q9Y6M4	7	7	3	3	275.869	51389	10.74	Casein kinase I isoform gamma-3	CSNK1G3	#N/A	#N/A	Carbamidomethylation	2356	Homo sapiens	#N/A	0.00388708	0.0324925	0.168034	-2.57318	60990.3	60677.4	48666.8	20163	299240	555585	154176	177707
P29373	7	7	6	6	282.747	15693	47.1	Cellular retinoic acid-binding protein 2	CRABP2	#N/A	#N/A	Carbamidomethylation	2541	Homo sapiens	#N/A	0.000125171	0.00573098	0.161651	-2.62905	988410	604063	575501	396405	3817270	3715580	2996500	4693510
P10643	38	38	38	38	474.376	93518	56.47	Complement component C7	C7	#N/A	#N/A	Carbamidomethylation; Oxidation (M)	252	Homo sapiens	#N/A	0.000134461	0.00596569	0.153564	-2.70309	3773860	2433090	3510780	2096030	22100000	27300000	14700000	13700000
P42658	10	9	10	9	301.859	97588	12.02	Dipeptidyl aminopeptidase-like protein 6	DPP6	#N/A	#N/A	Carbamidomethylation	1901	Homo sapiens	#N/A	0.000110268	0.00534953	0.148731	-2.74923	386529	181252	358126	214017	1551450	1786160	2442050	1621560
Q9Y625	16	15	14	14	364.691	62736	26.31	Glypican-6	GPC6	#N/A	#N/A	Carbamidomethylation; Oxidation (M)	878	Homo sapiens	#N/A	0.000151318	0.00643847	0.147711	-2.75915	1653090	923697	1559940	857470	8719960	11900000	6154890	6717780
Q96T23	4	4	4	4	201.876	163820	3.54	Remodeling and spacing factor 1	RSF1	#N/A	#N/A	N/A	3242	Homo sapiens	#N/A	1.47081e-05	0.00125163	0.14366	-2.79927	240571	274570	176202	204997	1703670	1911170	1101330	1562100
O43854	30	30	30	30	443.043	53765	63.13	EGF-like repeat and discoidin I-like domain-containing protein 3	EDIL3	#N/A	#N/A	Carbamidomethylation; Oxidation (M)	311	Homo sapiens	#N/A	0.000246587	0.00799914	0.129772	-2.94595	21900000	9267390	10700000	6682860	73300000	108000000	80000000	80800000
P27105	10	7	10	7	304.034	31731	31.25	Stomatin	STOM	0	Membrane	Carbamidomethylation; Oxidation (M)	1636	Homo sapiens	Tnon_mito	0.000216899	0.00750615	0.120426	-3.05378	604223	265114	348912	171348	2454020	2823140	2356640	2788920
Q7Z3B1	3	3	3	3	166.646	38719	14.41	Neuronal growth regulator 1	NEGR1	#N/A	#N/A	N/A	3893	Homo sapiens	#N/A	0.00436799	0.0348835	0.119082	-3.06997	29116.9	15336.4	11562.5	22843	215902	455798	74160.4	80368.3
Q7Z2D5	7	7	7	7	272.249	82983	11.93	Phospholipid phosphatase-related protein type 4	PLPPR4	#N/A	#N/A	Carbamidomethylation	2402	Homo sapiens	#N/A	0.00318418	0.0284849	0.116352	-3.10343	269478	125345	197466	48135.6	2261900	1151620	661863	1016120
Q5JRA6	27	27	27	27	443.687	213702	20.92	Transport and Golgi organization protein 1 homolog	MIA3	#N/A	#N/A	Carbamidomethylation; Oxidation (M)	505	Homo sapiens	#N/A	0.000214244	0.00750615	0.111846	-3.16042	11900000	11900000	6661870	12700000	55300000	138000000	72700000	138000000
Q13822	7	7	7	7	260.938	98994	9.5	Ectonucleotide pyrophosphatase/phosphodiesterase family member 2	ENPP2	#N/A	#N/A	Carbamidomethylation	2542	Homo sapiens	#N/A	0.00101059	0.0159602	0.0966421	-3.3712	138049	37976.7	85680	60836.8	1033470	1404340	491650	439039
Q53GL0	9	9	9	9	294.105	46237	29.34	Pleckstrin homology domain-containing family O member 1	PLEKHO1	#N/A	#N/A	Carbamidomethylation	2083	Homo sapiens	#N/A	0.00367076	0.0313403	0.0917595	-3.446	199861	31336.9	126073	297609	1419190	2128410	1009070	1087510
P00491	9	9	9	9	289.18	32118	38.75	Purine nucleoside phosphorylase	PNP	#N/A	#N/A	Carbamidomethylation; Oxidation (M)	2048	Homo sapiens	#N/A	0.0063127	0.0432404	0.0916502	-3.44772	306698	50887.5	244766	43376.6	1547800	1307970	566585	2047470
P22692	8	8	8	8	286.993	27934	38.37	Insulin-like growth factor-binding protein 4	IGFBP4	#N/A	#N/A	Carbamidomethylation; Oxidation (M)	2137	Homo sapiens	#N/A	0.000437942	0.0108773	0.0913185	-3.45295	306478	186763	431426	153018	2347470	5708720	1933970	2096600
Q3ZCW2	6	6	6	6	242.438	18986	40.12	Galectin-related protein	LGALSL	#N/A	#N/A	Acetylation (Protein N-term); Carbamidomethylation	2722	Homo sapiens	#N/A	0.00631405	0.0432404	0.0882738	-3.50187	383286	269709	401540	167393	1779140	943961	6813830	10000000
Q8NCC3	3	3	3	3	179.425	46658	10.92	Phospholipase A2 group XV	PLA2G15	#N/A	#N/A	Carbamidomethylation	3500	Homo sapiens	#N/A	2.52102e-05	0.00189661	0.084451	-3.56574	275772	360146	162111	197103	2790020	3680510	2057940	2952320
P98095	25	24	25	24	420.893	126573	29.73	Fibulin-2	FBLN2	#N/A	#N/A	Carbamidomethylation; Deamidation (NQ); Oxidation (M)	571	Homo sapiens	#N/A	0.000561461	0.0117522	0.0815264	-3.61659	622478	1361680	2929510	724355	12800000	21200000	12100000	12400000
P13646	22	22	9	9	417.888	49588	21.62	Keratin, type I cytoskeletal 13	KRT13	#N/A	#N/A	Carbamidomethylation; Oxidation (M)	486	Homo sapiens	#N/A	0.00666585	0.0445908	0.076187	-3.71431	97723.2	145343	145567	857537	1776480	2373000	1420130	8790180
Q12788	19	19	19	19	399.839	89035	35.15	Transducin beta-like protein 3	TBL3	#N/A	#N/A	Carbamidomethylation; Oxidation (M)	962	Homo sapiens	#N/A	0.00053032	0.0113851	0.0510786	-4.29114	3097320	2099650	2398300	3172650	158000000	25700000	26800000	66800000
Q6ZVX7	7	7	7	7	257.886	30847	28.73	F-box only protein 50	NCCRP1	#N/A	#N/A	N/A	2465	Homo sapiens	#N/A	0.000403622	0.0104454	0.03113	-5.00555	293238	109112	965944	246017	6799740	13300000	6681120	13400000
Q9UIV8	3	3	3	3	187.991	44276	9.72	Serpin B13	SERPINB13	#N/A	#N/A	N/A	3503	Homo sapiens	#N/A	4.39137e-07	6.70459e-05	7.99627e-06	-16.9322	0	0	0	0	406237	85059	37976.9	186394

## Sheet: Heatmap TOP 10 UP & DOWN
Up-regulated	Down-regulated																		Groups	EVMs APPswe				EVMS CTRL
Accession	#Peptides DB	#Peptides LFQ	#Unique DB	#Unique LFQ	-10LgP	Avg. Mass	Coverage (%)	Description	Gene	MitoCarta3.0_MitoPathways	MitoCarta3.0_SubMitoLocalization	PTM	Protein Group	Taxonomia	TrainingDataset	p-value	q-value	Fold change	Log2(FC)	EVMs_SH_APPswe_1 Area	EVMs_SH_APPswe_3 Area	EVMs_SH_APPswe_2 Area	EVMS_SH_APPswe_4 Area	EVMs_SH_CTRL_1 Area	EVMs_SH_CTRL_2 Area	EVMs_SH_CTRL_3 Area	EVMs_SH_CTRL_4 Area
Q96AE7	3	3	3	3	179.248	129558	3.94	Tetratricopeptide repeat protein 17	TTC17	#N/A	#N/A	N/A	3839	Homo sapiens	#N/A	1.455e-14	7.55288e-11	95561.9	16.5441	92587.8	101571	98645.2	89896.3	0	0	0	0
Q96NE9	4	4	4	4	218.558	72044	9	FERM domain-containing protein 6	FRMD6	#N/A	#N/A	N/A	3121	Homo sapiens	#N/A	1.17139e-06	0.000160018	72289.3	16.1415	40246.7	173373	19191.2	203932	0	0	0	0
Q6P4E1	4	3	4	3	210.351	49498	9.17	Protein GOLM2	GOLM2	#N/A	#N/A	N/A	3239	Homo sapiens	#N/A	0.00685152	0.0446906	13711.5	13.7431	162427	181648	92972.3	160073	0	12422.7	0	0
P56730	52	52	52	52	528.589	97067	64.8	Neurotrypsin	PRSS12	#N/A	#N/A	Carbamidomethylation; Deamidation (NQ); Oxidation (M)	102	Homo sapiens	#N/A	1.60488e-09	8.39071e-07	46.2752	5.53217	225000000	262000000	215000000	230000000	4813760	4823320	5817150	4706670
P05067	38	37	35	34	493.374	86943	48.7	Amyloid-beta precursor protein	APP	#N/A	#N/A	Carbamidomethylation; Deamidation (NQ); Oxidation (M)	126	Homo sapiens	#N/A	1.62852e-05	0.00136349	29.4357	4.8795	470000000	417000000	379000000	305000000	16100000	23200000	11600000	6964680
Q6ZRI8	27	27	27	27	450.053	61664	59.96	Rho GTPase-activating protein 36	ARHGAP36	#N/A	#N/A	Carbamidomethylation; Deamidation (NQ); Oxidation (M)	407	Homo sapiens	#N/A	5.39253e-06	0.000608535	18.9309	4.24267	50200000	59000000	50700000	43000000	2249940	1718110	3472730	3745040
P16402	19	18	4	4	400.777	22350	19.91	Histone H1.3	H1-3	#N/A	#N/A	Acetylation (Protein N-term)	815	Homo sapiens	#N/A	3.03237e-05	0.0022171	15.116	3.91801	4229700	6957520	2634870	4479830	302689	408248	253406	212468
Q14432	7	7	7	7	268.468	124979	7.45	cGMP-inhibited 3',5'-cyclic phosphodiesterase 3A	PDE3A	#N/A	#N/A	N/A	2442	Homo sapiens	#N/A	2.13607e-05	0.0017059	14.8479	3.89219	1265280	1388820	777852	998940	83510.4	61235.2	113670	48330.5
Q96MW5	9	9	9	9	318.603	68424	18.3	Conserved oligomeric Golgi complex subunit 8	COG8	#N/A	#N/A	Carbamidomethylation	2040	Homo sapiens	#N/A	0.00692012	0.0448282	14.3976	3.84776	434176	1330120	388414	881079	39754	14781	31964.6	244876
Q6UXH1	6	6	6	6	262.237	38192	24.36	Protein disulfide isomerase CRELD2	CRELD2	#N/A	#N/A	Carbamidomethylation	2822	Homo sapiens	#N/A	9.66764e-05	0.0048723	13.9548	3.80269	2330770	1564210	1247810	1443120	53591.1	147003	137202	160167
Q53GL0	9	9	9	9	294.105	46237	29.34	Pleckstrin homology domain-containing family O member 1	PLEKHO1	#N/A	#N/A	Carbamidomethylation	2083	Homo sapiens	#N/A	0.00367076	0.0313403	0.0917595	-3.446	199861	31336.9	126073	297609	1419190	2128410	1009070	1087510
P00491	9	9	9	9	289.18	32118	38.75	Purine nucleoside phosphorylase	PNP	#N/A	#N/A	Carbamidomethylation; Oxidation (M)	2048	Homo sapiens	#N/A	0.0063127	0.0432404	0.0916502	-3.44772	306698	50887.5	244766	43376.6	1547800	1307970	566585	2047470
P22692	8	8	8	8	286.993	27934	38.37	Insulin-like growth factor-binding protein 4	IGFBP4	#N/A	#N/A	Carbamidomethylation; Oxidation (M)	2137	Homo sapiens	#N/A	0.000437942	0.0108773	0.0913185	-3.45295	306478	186763	431426	153018	2347470	5708720	1933970	2096600
Q3ZCW2	6	6	6	6	242.438	18986	40.12	Galectin-related protein	LGALSL	#N/A	#N/A	Acetylation (Protein N-term); Carbamidomethylation	2722	Homo sapiens	#N/A	0.00631405	0.0432404	0.0882738	-3.50187	383286	269709	401540	167393	1779140	943961	6813830	10000000
Q8NCC3	3	3	3	3	179.425	46658	10.92	Phospholipase A2 group XV	PLA2G15	#N/A	#N/A	Carbamidomethylation	3500	Homo sapiens	#N/A	2.52102e-05	0.00189661	0.084451	-3.56574	275772	360146	162111	197103	2790020	3680510	2057940	2952320
P98095	25	24	25	24	420.893	126573	29.73	Fibulin-2	FBLN2	#N/A	#N/A	Carbamidomethylation; Deamidation (NQ); Oxidation (M)	571	Homo sapiens	#N/A	0.000561461	0.0117522	0.0815264	-3.61659	622478	1361680	2929510	724355	12800000	21200000	12100000	12400000
P13646	22	22	9	9	417.888	49588	21.62	Keratin, type I cytoskeletal 13	KRT13	#N/A	#N/A	Carbamidomethylation; Oxidation (M)	486	Homo sapiens	#N/A	0.00666585	0.0445908	0.076187	-3.71431	97723.2	145343	145567	857537	1776480	2373000	1420130	8790180
Q12788	19	19	19	19	399.839	89035	35.15	Transducin beta-like protein 3	TBL3	#N/A	#N/A	Carbamidomethylation; Oxidation (M)	962	Homo sapiens	#N/A	0.00053032	0.0113851	0.0510786	-4.29114	3097320	2099650	2398300	3172650	158000000	25700000	26800000	66800000
Q6ZVX7	7	7	7	7	257.886	30847	28.73	F-box only protein 50	NCCRP1	#N/A	#N/A	N/A	2465	Homo sapiens	#N/A	0.000403622	0.0104454	0.03113	-5.00555	293238	109112	965944	246017	6799740	13300000	6681120	13400000
Q9UIV8	3	3	3	3	187.991	44276	9.72	Serpin B13	SERPINB13	#N/A	#N/A	N/A	3503	Homo sapiens	#N/A	4.39137e-07	6.70459e-05	7.99627e-06	-16.9322	0	0	0	0	406237	85059	37976.9	186394
