# Supplementary material for: Large extracellular vesicles containing mitochondria (EVMs) derived from Alzheimer’s disease cells harbor pathologic functional and molecular profiles and spread mitochondrial dysfunctions
Source: Research Square preprint supplement (doi:10.21203/rs.3.rs-5932075/v1), 2025-02-13
Supplement: Supplementary file 5 [file ae628d9561e79fd50b479fe6.xlsx]

## Sheet: Heatmap AD-MCIvsCTRL prot MITO
Up-regulated	Dow-regulated																		CTRL				AD-MCI
Protein Group	Accession	Gene	Description	#Peptides DB	#Peptides LFQ	#Unique DB	#Unique LFQ	Avg. Mass	Coverage (%)	-10LgP	MitoPathway	PTM	Taxonomia	Training Data set	p-value	q-value	Fold change	Log2(FC)	CTRL-1 Area	CTRL-2 Area	CTRL-3 Area	CTRL-4 Area	AD-MCI-1 Area	AD-MCI-2 Area	AD-MCI-3 Area	AD-MCI-4 Area	AD-MCI-5 Area	AD-MCI-6 Area
2986	P80404	ABAT	4-aminobutyrate aminotransferase, mitochondrial	1	1	1	1	56439	3	62.891	Metabolism > Amino acid metabolism > GABA metabolism | Metabolism > Metals and cofactors > Fe-S-containing proteins	N/A	Homo sapiens	Tmito	0.446813	0.559698	4.62424		0	0	0	0	0	0	0	0	9777.83	0
2699	P28288	ABCD3	ATP-binding cassette sub-family D member 3	1	1	1	1	75476	2.12	42.9789	Small molecule transport > ABC transporters	N/A	Homo sapiens	Tmito	0.673262	0.743983	0.213365		21937.8	0	19259.1	0	0	0	0	0	20341.6	40280.5
1341	P09110	ACAA1	3-ketoacyl-CoA thiolase, peroxisomal	6	6	6	6	44292	25.71	180.576	Metabolism > Lipid metabolism	Carbamidomethylation	Homo sapiens	Tpossible_mito	0.400681	0.521678	1.5461		258110	109291	879008	124503	198670	361842	171784	362373	664881	787483
606	P42765	ACAA2	3-ketoacyl-CoA thiolase, mitochondrial	14	13	14	13	41924	48.36	219.961	Metabolism > Carbohydrate metabolism > Ketone metabolism | Metabolism > Lipid metabolism > Fatty acid oxidation | Metabolism > Amino acid metabolism > Lysine metabolism	Carbamidomethylation; Deamidation (NQ); Oxidation (M)	Homo sapiens	Tmito	0.233585	0.398915	0.318438		2608320	40300000	2098660	53700000	1482460	28100000	1397730	3362670	3147800	2181310
2872	P20674	COX5A	Cytochrome c oxidase subunit 5A, mitochondrial	1	1	1	1	16762	20	47.444	OXPHOS > Complex IV > CIV subunits | OXPHOS > OXPHOS subunits	N/A	Homo sapiens	Tmito	0.00672628	0.352911	4113.88	12.0063	0	0	89090.8	0	13431.2	84919.8	75861.9	84957.4	166996	105004
2239	P11310	ACADM	Medium-chain specific acyl-CoA dehydrogenase, mitochondrial	2	2	2	2	46588	5.23	73.1585	Metabolism > Lipid metabolism > Fatty acid oxidation	N/A	Homo sapiens	Tmito	0.138746	0.395999	45.7183		280991	88492	0	64153.8	290084	243747	209324	503152	274494	284611
367	P49748	ACADVL	Very long-chain specific acyl-CoA dehydrogenase, mitochondrial	22	20	22	20	70390	43.97	239.856	Metabolism > Lipid metabolism > Fatty acid oxidation	Carbamidomethylation; Deamidation (NQ)	Homo sapiens	Tmito	0.73071	0.790851	1.07473		11400000	12100000	9316190	5942560	10500000	8600300	13700000	14400000	6338940	9106490
727	P24752	ACAT1	Acetyl-CoA acetyltransferase, mitochondrial	13	12	13	12	45200	40.28	246.417	Metabolism > Carbohydrate metabolism > Ketone metabolism | Metabolism > Lipid metabolism > Fatty acid oxidation | Metabolism > Amino acid metabolism > Branched-chain amino acid metabolism | Metabolism > Amino acid metabolism > Lysine metabolism	Carbamidomethylation; Oxidation (M)	Homo sapiens	Tmito	0.120754	0.395999	2.02413		3443710	787070	3298950	767543	3008660	2125930	1790960	4294600	5533630	4542260
134	P53396	ACLY	ATP-citrate synthase	44	42	44	42	120839	45.32	342.794	Metabolism > Carbohydrate metabolism > TCA-associated	Carbamidomethylation; Oxidation (M)	Homo sapiens	Tmito	0.86509	0.884712	0.960314		54700000	22900000	31000000	23900000	30500000	51600000	25200000	34300000	19600000	26300000
333	Q99798	ACO2	Aconitate hydratase, mitochondrial	24	24	24	24	85425	38.33	263.462	Metabolism > Carbohydrate metabolism > TCA cycle | Metabolism > Metals and cofactors > Fe-S-containing proteins	Carbamidomethylation; Deamidation (NQ)	Homo sapiens	Tmito	0.0990405	0.395999	2.70914		21000000	14000000	19500000	1828840	14500000	57900000	14600000	37400000	31600000	29300000
2673	Q9NPJ3	ACOT13	Acyl-coenzyme A thioesterase 13	1	1	1	1	14960	7.14	43.9123	Metabolism > Lipid metabolism	N/A	Homo sapiens	Tpossible_mito	0.368468	0.497201	0.68725		116600	34461.7	163517	55184.7	71414.5	43990.4	61870.3	107457	21317.9	51666.4
1829	O00154	ACOT7	Cytosolic acyl coenzyme A thioester hydrolase	4	3	4	3	41796	10.26	123.211	Metabolism > Lipid metabolism	Oxidation (M)	Homo sapiens	Tpossible_mito	0.348091	0.482119	1.33464		988650	256472	324151	464217	514640	1021640	508870	731990	388275	553944
1760	Q9Y305	ACOT9	Acyl-coenzyme A thioesterase 9, mitochondrial	4	4	4	4	49902	11.85	104.04	Metabolism > Lipid metabolism	N/A	Homo sapiens	Tmito	0.340904	0.479453	1.5412		987361	152520	349745	130500	524089	475232	193156	570924	437232	635904
1812	Q9Y4W6	AFG3L2	AFG3-like protein 2	4	4	3	3	88584	3.39	143.647	Protein import, sorting and homeostasis > Protein homeostasis > Proteases	Carbamidomethylation	Homo sapiens	Tmito	0.236743	0.401451	1.74313		453409	188193	86152	58602.2	230509	458721	373389	299205	134035	158420
1840	Q53H12	AGK	Acylglycerol kinase, mitochondrial	4	4	4	4	47137	12.8	105.51	Protein import, sorting and homeostasis > Protein import and sorting > TIM22 carrier pathway | Metabolism > Lipid metabolism > Phospholipid metabolism	N/A	Homo sapiens	Tmito	0.682552	0.751093	1.12561		399113	618074	341437	133547	265228	328015	321622	460229	446630	421869
2299	O95831	AIFM1	Apoptosis-inducing factor 1, mitochondrial	2	2	2	2	66901	3.92	64.2829	Protein import, sorting and homeostasis > Protein import and sorting > MIA40 | OXPHOS > Complex I > CI assembly factors | OXPHOS > OXPHOS assembly factors | Mitochondrial dynamics and surveillance > Apoptosis	N/A	Homo sapiens	Tmito	0.20843	0.395999	1.47824		55923	16280.7	37293.8	20725.2	50338.3	42052.2	21528.6	57215.3	52294.6	45175
2645	Q96NN9	AIFM3	Apoptosis-inducing factor 3	1	1	1	1	66791	1.16	45.8876	Metabolism > Metals and cofactors > Fe-S-containing proteins | Mitochondrial dynamics and surveillance > Apoptosis	Deamidation (NQ)	Homo sapiens	Tmito	0.498962	0.596486	0.634027		1303030	340456	136899	203877	321453	868829	294219	247898	78659.7	55856.9
2325	P54819	AK2	Adenylate kinase 2, mitochondrial	2	2	2	2	26478	14.64	92.2012	Metabolism > Nucleotide metabolism > Nucleotide synthesis and processing	N/A	Homo sapiens	Tmito	0.333258	0.473766	1.31272		153633	68641.8	197504	94847.5	144488	123956	86851	214710	196361	216656
1120	Q9UIJ7	AK3	GTP:AMP phosphotransferase AK3, mitochondrial	7	7	7	7	25565	37.89	153.833	Metabolism > Nucleotide metabolism > Nucleotide synthesis and processing	Deamidation (NQ)	Homo sapiens	Tmito	0.762308	0.805169	1.09865		976194	451915	1378070	1951860	743228	1349610	794991	1131350	1564930	1610070
3026	P27144	AK4	Adenylate kinase 4, mitochondrial	1	1	1	1	25268	5.38	47.0813	Metabolism > Nucleotide metabolism > Nucleotide synthesis and processing	N/A	Homo sapiens	Tmito	0.073532	0.38343	659.166		0	0	51152.9	0	0	54431.5	30310.1	96637.5	114450	52008.7
976	O43488	AKR7A2	Aflatoxin B1 aldehyde reductase member 2	8	8	4	4	39589	19.78	193.395	Metabolism > Amino acid metabolism > GABA metabolism | Metabolism > Detoxification > Xenobiotic metabolism	Carbamidomethylation; Deamidation (NQ)	Homo sapiens	Tmito	0.116223	0.395999	2.44338		1959200	418847	1007650	145402	693442	3018500	1196750	1536290	1424070	1618690
1631	P54886	ALDH18A1	Delta-1-pyrroline-5-carboxylate synthase	5	5	5	5	87302	7.42	128.837	Metabolism > Amino acid metabolism > Proline metabolism	N/A	Homo sapiens	Tmito	0.712532	0.774363	1.20547		3317540	1095830	554823	920050	1050640	6247610	1505680	972358	776403	1039680
1021	P30837	ALDH1B1	Aldehyde dehydrogenase X, mitochondrial	9	9	9	9	57249	27.47	182.45	Metabolism > Detoxification > Xenobiotic metabolism	Oxidation (M)	Homo sapiens	Tmito	0.291108	0.434394	1.94075		1093090	137261	1732310	202139	574071	1061810	332255	1607050	1544110	1280400
281	Q3SY69	ALDH1L2	Mitochondrial 10-formyltetrahydrofolate dehydrogenase	26	23	26	23	101746	31.53	256.189	Metabolism > Vitamin metabolism > Folate and 1-C metabolism	Carbamidomethylation; Deamidation (NQ)	Homo sapiens	Tmito	0.558316	0.661428	1.2916		5593330	1157320	1744000	876325	2522200	3722170	1463600	4329460	1115250	2177580
1063	P05091	ALDH2	Aldehyde dehydrogenase, mitochondrial	8	7	8	7	56381	17.79	180.989	Metabolism > Detoxification > Xenobiotic metabolism	N/A	Homo sapiens	Tmito	0.125622	0.395999	2.15167		933937	419055	435684	209650	545735	1265680	2222880	1947360	618184	362872
1890	P51648	ALDH3A2	Aldehyde dehydrogenase family 3 member A2	3	3	2	2	54848	5.15	99.1393	Metabolism > Detoxification > ROS and glutathione metabolism	N/A	Homo sapiens	Tpossible_mito	0.1669	0.395999	33.3304		80154.6	0	150346	82894.4	222666	251388	64964.3	99645.5	282380	423060
2410	P30038	ALDH4A1	Delta-1-pyrroline-5-carboxylate dehydrogenase, mitochondrial	2	1	2	1	61719	1.42	58.1357	Metabolism > Amino acid metabolism > Proline metabolism | Metabolism > Amino acid metabolism > Glyoxylate metabolism	N/A	Homo sapiens	Tmito	0.393347	0.517252	0.130642		71439.1	80709	65579.6	38373.6	0	42203.4	32451.2	66985.9	53298	56198.2
464	P49419	ALDH7A1	Alpha-aminoadipic semialdehyde dehydrogenase	19	19	19	19	58487	47.87	270.003	Metabolism > Amino acid metabolism > Lysine metabolism | Metabolism > Amino acid metabolism > Glycine metabolism | Metabolism > Vitamin metabolism > Choline and betaine metabolism | Metabolism > Vitamin metabolism > Folate and 1-C metabolism | Metabolism > Detoxification > ROS and glutathione metabolism	Carbamidomethylation; Deamidation (NQ)	Homo sapiens	Tmito	0.33087	0.472929	1.3006		5884730	1944960	5321760	4004040	3497770	5944750	3588730	5580620	5685260	7786670
753	P49189	ALDH9A1	4-trimethylaminobutyraldehyde dehydrogenase	14	13	14	13	53802	31.17	200.949	Metabolism > Amino acid metabolism > GABA metabolism | Metabolism > Detoxification > ROS and glutathione metabolism	Acetylation (Protein N-term); Carbamidomethylation; Oxidation (M)	Homo sapiens	Tmito	0.320146	0.465184	0.82549		7839430	3621450	5885530	4516370	4851130	4752170	3081430	4314590	3523770	6073650
2834	P27695	APEX1	DNA-(apurinic or apyrimidinic site) endonuclease	1	1	1	1	35554	5.35	59.2502	Mitochondrial central dogma > mtDNA maintenance > mtDNA repair	N/A	Homo sapiens	Tpossible_mito	0.214473	0.395999	15.4631		17022.5	0	18324	58060	51074	19984.2	34958.5	23366.3	32164.8	39287.4
2423	P36404	ARL2	ADP-ribosylation factor-like protein 2	2	2	2	2	20878	10.87	58.7401	Mitochondrial dynamics and surveillance > Fusion	N/A	Homo sapiens	Tmito	0.160288	0.395999	1.62226		60420.8	43612.4	81670.9	59580.3	55683.7	70905.1	123207	205968	51866.7	161045
1506	Q9UH62	ARMCX3	Armadillo repeat-containing X-linked protein 3	5	4	5	4	42501	15.04	147.938	Mitochondrial dynamics and surveillance > Trafficking	N/A	Homo sapiens	Tpossible_mito	0.397137	0.519637	1.4951		1010160	77080.7	288827	167720	229997	434332	334648	463770	465812	358276
1339	Q9NVI7	ATAD3A	ATPase family AAA domain-containing protein 3A	7	7	4	4	71369	8.99	172.747	Mitochondrial central dogma > mtDNA maintenance > mtDNA nucleoid | Mitochondrial dynamics and surveillance > Organelle contact sites | Mitochondrial dynamics and surveillance > Intramitochondrial membrane interactions	N/A	Homo sapiens	Tmito	0.185743	0.395999	1.9275		1518590	177629	656690	153558	849561	989713	477165	730917	850977	921904
1825	Q5T9A4	ATAD3B	ATPase family AAA domain-containing protein 3B	4	4	1	1	72573	1.85	113.031	Mitochondrial central dogma > mtDNA maintenance > mtDNA nucleoid | Mitochondrial dynamics and surveillance > Organelle contact sites | Mitochondrial dynamics and surveillance > Intramitochondrial membrane interactions	N/A	Homo sapiens	Tmito	0.221338	0.395999	1.70676		196840	208980	73952.7	179275	359529	641552	140107	137841	479969	147249
266	P25705	ATP5F1A	ATP synthase subunit alpha, mitochondrial	24	23	24	23	59751	50.27	320.298	OXPHOS > Complex V > CV subunits | OXPHOS > OXPHOS subunits	Oxidation (M)	Homo sapiens	Tmito	0.16478	0.395999	1.50906		50900000	16500000	23800000	10400000	30700000	37800000	29800000	32400000	30000000	33300000
148	P06576	ATP5F1B	ATP synthase subunit beta, mitochondrial	24	24	24	24	56560	68.81	332.965	OXPHOS > Complex V > CV subunits | OXPHOS > OXPHOS subunits	Deamidation (NQ); Oxidation (M)	Homo sapiens	Tmito	0.13115	0.395999	1.33855		54900000	28000000	42100000	22200000	39200000	43300000	42100000	52600000	54000000	48800000
1065	P36542	ATP5F1C	ATP synthase subunit gamma, mitochondrial	8	7	8	7	32996	32.21	163.639	OXPHOS > Complex V > CV subunits | OXPHOS > OXPHOS subunits	Carbamidomethylation; Deamidation (NQ)	Homo sapiens	Tmito	0.20333	0.395999	1.56335		2550900	663221	1649860	512361	2098430	1865590	1068070	1800380	1739090	1907250
2466	P30049	ATP5F1D	ATP synthase subunit delta, mitochondrial	1	1	1	1	17490	8.33	63.7232	OXPHOS > Complex V > CV subunits | OXPHOS > OXPHOS subunits	N/A	Homo sapiens	Tmito	0.229809	0.398767	23.9874		326213	89580.6	317470	0	167679	148997	159723	345765	397209	310597
1427	Q9ULD0	OGDHL	2-oxoglutarate dehydrogenase-like, mitochondrial	6	5	1	1	114481	0.69	123.455	Metabolism > Carbohydrate metabolism > TCA cycle	N/A	Homo sapiens	Tmito	0.0356483	0.38343	3582.92	11.8069	0	0	0	0	154911	468008	249722	0	116850	0
1732	P56134	ATP5MF	ATP synthase subunit f, mitochondrial	3	3	3	3	10918	39.36	102.365	OXPHOS > Complex V > CV subunits | OXPHOS > OXPHOS subunits	Acetylation (Protein N-term); Carbamidomethylation; Oxidation (M)	Homo sapiens	Tmito	0.0665221	0.38343	2.37753		761410	222985	689442	120768	731712	842548	402112	1308890	934009	1001700
1704	O75964	ATP5MG	ATP synthase subunit g, mitochondrial	4	4	4	4	11428	46.6	125.648	OXPHOS > Complex V > CV subunits | OXPHOS > OXPHOS subunits | Mitochondrial dynamics and surveillance > Cristae formation	N/A	Homo sapiens	Tmito	0.10928	0.395999	2.08486		486851	299084	1622190	218668	539992	1424940	711233	898812	1307510	1498870
3089	Q96IX5	ATP5MK	ATP synthase membrane subunit K, mitochondrial	1	1	1	1	6458	25.86	52.3092	OXPHOS > Complex V > CV subunits | OXPHOS > OXPHOS subunits | Mitochondrial dynamics and surveillance > Cristae formation	N/A	Homo sapiens	Tmito	0.241504	0.401451	0.0733975		0	0	34456.7	0	0	0	0	0	0	0
1257	P24539	ATP5PB	ATP synthase F(0) complex subunit B1, mitochondrial	7	7	7	7	28909	29.3	170.353	OXPHOS > Complex V > CV subunits | OXPHOS > OXPHOS subunits	N/A	Homo sapiens	Tmito	0.221273	0.395999	1.50149		2415920	780043	1788120	511946	1709280	1624080	1191870	1850750	1778130	2384560
1273	O75947	ATP5PD	ATP synthase subunit d, mitochondrial	6	6	6	6	18491	42.24	155.264	OXPHOS > Complex V > CV subunits | OXPHOS > OXPHOS subunits	Carbamidomethylation	Homo sapiens	Tmito	0.195655	0.395999	2.87968		1013210	467354	1295520	22274	645934	1125040	1028700	988674	1269770	970555
2255	Q96C36	PYCR2	Pyrroline-5-carboxylate reductase 2	2	2	1	1	33637	5	96.9193	Metabolism > Amino acid metabolism > Proline metabolism	Acetylation (Protein N-term)	Homo sapiens	Tmito	0.00933974	0.352911	1603.06	10.6466	55073.7	0	0	0	39510.7	30920.1	12569.9	36640	21386.8	18227.6
1038	Q07021	C1QBP	Complement component 1 Q subcomponent-binding protein, mitochondrial	6	6	6	6	31362	28.37	193.889	Signaling > Immune response	Carbamidomethylation; Deamidation (NQ)	Homo sapiens	Tmito	0.0833712	0.391547	4.41033		1678860	26962	769088	373055	1480680	974105	779102	1795630	1795470	3006360
2911	Q9HA77	CARS2	Probable cysteine--tRNA ligase, mitochondrial	1	1	1	1	62224	3.19	54.146	Mitochondrial central dogma > Translation > mt-tRNA synthetases	N/A	Homo sapiens	Tmito	0.670284	0.743983	5.9315		110287	0	132119	0	86823.6	0	0	82881.8	99680.1	106787
481	P04040	CAT	Catalase	17	16	17	16	59756	38.9	285.273	Metabolism > Detoxification > ROS and glutathione metabolism	Carbamidomethylation; Deamidation (NQ); Oxidation (M)	Homo sapiens	Tpossible_mito	0.319406	0.465184	1.45243		5915820	4109540	4858900	4016650	8164940	12500000	2167020	5339030	13700000	5997720
1199	Q9NX63	CHCHD3	MICOS complex subunit MIC19	8	8	8	8	26152	35.24	182.411	Mitochondrial dynamics and surveillance > Cristae formation > MICOS complex | Mitochondrial dynamics and surveillance > Intramitochondrial membrane interactions	Carbamidomethylation	Homo sapiens	Tmito	0.0582271	0.38343	2.39288		1349270	242631	1263520	318219	1299300	1261530	826028	1713440	1893860	2040520
3073	O76031	CLPX	ATP-dependent Clp protease ATP-binding subunit clpX-like, mitochondrial	1	1	1	1	69224	2.05	46.8262	Protein import, sorting and homeostasis > Protein homeostasis > Proteases	N/A	Homo sapiens	Tmito	0.453968	0.559698	1.49142		632141	426035	126229	87932.1	291356	886537	653824	352482	175126	172535
388	P21964	COMT	Catechol O-methyltransferase	18	18	18	18	30037	71.22	268.863	Metabolism > Amino acid metabolism > Catechol metabolism	Carbamidomethylation; Deamidation (NQ); Oxidation (M)	Homo sapiens	Tmito	0.220468	0.395999	1.78208		5956200	1317380	5580750	736728	3698590	5115330	3393430	3092360	5812010	5086460
1632	P13073	COX4I1	Cytochrome c oxidase subunit 4 isoform 1, mitochondrial	5	5	5	5	19577	26.63	117.14	OXPHOS > Complex IV > CIV subunits | OXPHOS > OXPHOS subunits	N/A	Homo sapiens	Tmito	0.184025	0.395999	1.84058		2150070	859191	3087450	502623	909868	3148230	2200970	3746800	3198750	2497530
2467	Q7L2E3	DHX30	ATP-dependent RNA helicase DHX30	1	1	1	1	133938	1.51	49.6908	Mitochondrial central dogma > mtRNA metabolism > mtRNA granules | Mitochondrial central dogma > Translation > Mitochondrial ribosome assembly	N/A	Homo sapiens	Tmito	0.00378499	0.352911	1583.86	10.6292	9975.69	0	0	0	14977.5	23609.4	23852.9	14586.5	11417.7	11197.4
2057	P10606	COX5B	Cytochrome c oxidase subunit 5B, mitochondrial	3	3	3	3	13696	19.38	88.6951	OXPHOS > Complex IV > CIV subunits | OXPHOS > OXPHOS subunits	N/A	Homo sapiens	Tmito	0.239127	0.401451	2.85592		339230	286634	628200	7060.54	293579	276614	350255	619597	573345	480956
2178	P09669	COX6C	Cytochrome c oxidase subunit 6C	2	1	2	1	8781	9.33	70.738	OXPHOS > Complex IV > CIV subunits | OXPHOS > OXPHOS subunits	N/A	Homo sapiens	Tmito	0.184961	0.395999	2.08037		218876	95775.5	427218	39836.2	91525.2	295414	298351	447612	447459	338108
1925	P36551	CPOX	Oxygen-dependent coproporphyrinogen-III oxidase, mitochondrial	3	3	3	3	50152	6.39	88.1329	Metabolism > Metals and cofactors > Heme synthesis and processing	Carbamidomethylation	Homo sapiens	Tmito	0.253188	0.403482	0.365089		237857	3125490	4940300	3710870	309659	864166	226140	587156	530993	6315190
1210	P50416	CPT1A	Carnitine O-palmitoyltransferase 1, liver isoform	7	6	7	6	88368	10.09	145.664	Metabolism > Lipid metabolism > Fatty acid oxidation | Metabolism > Metals and cofactors > Carnitine synthesis and transport | Metabolism > Metals and cofactors > Carnitine shuttle	Carbamidomethylation; Deamidation (NQ)	Homo sapiens	Tmito	0.136667	0.395999	2.68096		1259180	69302.3	302518	121888	426465	2291730	495652	556570	559915	448952
938	Q08257	CRYZ	Quinone oxidoreductase	10	10	10	10	35207	43.77	187.506	0	Carbamidomethylation; Deamidation (NQ)	Homo sapiens	Tmito	0.1819	0.395999	1.9531		392736	254540	1434990	415946	1158260	451538	380837	1409850	1341630	2147400
581	P49448	GLUD2	Glutamate dehydrogenase 2, mitochondrial	17	17	1	1	61434	2.33	237.74	Metabolism > Amino acid metabolism > Glutamate metabolism | Metabolism > Amino acid metabolism > GABA metabolism	N/A	Homo sapiens	Tpossible_mito	0.00886247	0.352911	860.674	9.74932	19093.3	0	0	0	6833.33	4633.11	14015	11421.4	19987	10587.3
1721	O43169	CYB5B	Cytochrome b5 type B	3	3	3	3	16695	43.33	134.195	Metabolism > Metals and cofactors > Heme-containing proteins | Metabolism > Detoxification > Xenobiotic metabolism | Metabolism > Detoxification > Amidoxime reducing complex | Metabolism > Electron carriers > Cytochromes	Deamidation (NQ)	Homo sapiens	Tmito	0.220853	0.395999	2.01792		638805	416729	2487840	145360	822024	740954	682134	1265730	1628200	2355370
168	P00387	CYB5R3	NADH-cytochrome b5 reductase 3	21	20	21	20	34235	78.74	341.205	Metabolism > Detoxification > Xenobiotic metabolism | Metabolism > Detoxification > Amidoxime reducing complex | Metabolism > Lipid metabolism	Carbamidomethylation; Deamidation (NQ); Oxidation (M)	Homo sapiens	Tmito	0.105734	0.395999	1.83132		48000000	16300000	64400000	16300000	35500000	64700000	38900000	53000000	77100000	76900000
2368	O95169	NDUFB8	NADH dehydrogenase [ubiquinone] 1 beta subcomplex subunit 8, mitochondrial	2	2	2	2	21766	12.37	74.1608	OXPHOS > Complex I > CI subunits | OXPHOS > OXPHOS subunits	N/A	Homo sapiens	Tmito	0.0489636	0.38343	647.712	9.33921	178281	0	225302	0	245701	181973	273258	453300	357420	300293
1523	O96008	TOMM40	Mitochondrial import receptor subunit TOM40 homolog	4	2	4	2	37893	9.42	97.7613	Protein import, sorting and homeostasis > Protein import and sorting > TOM	N/A	Homo sapiens	Tmito	0.0368887	0.38343	625.241	9.28827	162948	0	0	33597.4	124664	246256	140223	194390	174592	165642
2146	Q7Z4W1	DCXR	L-xylulose reductase	2	2	2	2	25913	8.61	68.2682	Metabolism > Carbohydrate metabolism	N/A	Homo sapiens	Tmito	0.21129	0.395999	1.26303		312419	201738	194038	125822	249929	288729	205571	200286	303479	271761
1203	Q16698	DECR1	2,4-dienoyl-CoA reductase [(3E)-enoyl-CoA-producing], mitochondrial	7	7	7	7	36068	25.37	177.536	Metabolism > Lipid metabolism > Fatty acid oxidation	N/A	Homo sapiens	Tmito	0.0719396	0.38343	2.02921		1748530	317305	1416610	572901	1758520	1421950	1098230	2347590	1738830	1881780
2399	P56385	ATP5ME	ATP synthase subunit e, mitochondrial	2	2	2	2	7933	30.43	59.3274	OXPHOS > Complex V > CV subunits | OXPHOS > OXPHOS subunits | Mitochondrial dynamics and surveillance > Cristae formation	N/A	Homo sapiens	Tmito	0.0493822	0.38343	535.409	9.0645	141606	0	125815	0	629743	213188	79880.2	164712	206720	153413
2975	Q12849	GRSF1	G-rich sequence factor 1	1	1	1	1	53126	4.58	59.3531	Mitochondrial central dogma > mtRNA metabolism > mtRNA granules | Mitochondrial central dogma > mtRNA metabolism > Polycistronic mtRNA processing | Mitochondrial central dogma > mtRNA metabolism > mtRNA stability and decay | Mitochondrial central dogma > Translation > Mitochondrial ribosome assembly	N/A	Homo sapiens	Tmito	0.0386031	0.38343	367.023	8.51973	48627	0	23471.2	0	36122.3	90786.6	73454.9	61896.6	92104.8	68629.8
572	P09622	DLD	Dihydrolipoyl dehydrogenase, mitochondrial	11	11	11	11	54177	31.43	227.872	Metabolism > Carbohydrate metabolism > Pyruvate metabolism | Metabolism > Carbohydrate metabolism > TCA cycle | Metabolism > Amino acid metabolism > Branched-chain amino acid metabolism | Metabolism > Amino acid metabolism > Branched-chain amino acid dehydrogenase complex | Metabolism > Amino acid metabolism > Lysine metabolism | Metabolism > Amino acid metabolism > Glycine metabolism | Metabolis…	Carbamidomethylation; Deamidation (NQ); Oxidation (M)	Homo sapiens	Tmito	0.384073	0.507593	1.30354		6553800	1626500	3643400	3509380	4397550	3541950	2573360	6876320	5609130	5049780
645	P36957	DLST	Dihydrolipoyllysine-residue succinyltransferase component of 2-oxoglutarate dehydrogenase complex, mitochondrial	11	11	11	11	48755	24.28	210.027	Metabolism > Carbohydrate metabolism > TCA cycle | Metabolism > Amino acid metabolism > Lysine metabolism	Deamidation (NQ); Oxidation (M)	Homo sapiens	Tmito	0.0548575	0.38343	1.88732		4744640	2066220	5224630	1622070	4663730	4553950	3910430	6355170	7352960	8818640
330	O00429	DNM1L	Dynamin-1-like protein	24	24	24	24	81877	43.07	275.026	Mitochondrial dynamics and surveillance > Fission	Acetylation (Protein N-term); Carbamidomethylation; Deamidation (NQ); Oxidation (M)	Homo sapiens	Tmito	0.375262	0.498454	1.2621		3486180	1123510	2734790	1559890	2015350	3841850	1992330	3329970	2194950	2448250
1323	P23919	DTYMK	Thymidylate kinase	7	7	7	7	23819	37.26	146.106	Metabolism > Nucleotide metabolism > Nucleotide synthesis and processing	Carbamidomethylation	Homo sapiens	Tpossible_mito	0.366907	0.497201	1.45564		1694110	616145	714256	716725	4918420	1128700	915972	898728	983941	826392
1258	Q13011	ECH1	Delta(3,5)-Delta(2,4)-dienoyl-CoA isomerase, mitochondrial	7	6	7	6	35816	20.73	140.266	Metabolism > Lipid metabolism	Carbamidomethylation	Homo sapiens	Tmito	0.16451	0.395999	2.65734		458855	1121390	1224050	2001250	2284660	10300000	382619	2373210	3117000	7481420
3091	P83111	LACTB	Serine beta-lactamase-like protein LACTB, mitochondrial	1	1	1	1	60694	2.74	67.2128	Protein import, sorting and homeostasis > Protein homeostasis > Proteases | Metabolism > Lipid metabolism > Phospholipid metabolism	N/A	Homo sapiens	Tmito	0.0431813	0.38343	282.339	8.14128	35775.2	0	20877.1	0	24597.2	43610.4	24411.8	63101.1	105574	59269.8
1961	P42126	ECI1	Enoyl-CoA delta isomerase 1, mitochondrial	2	2	2	2	32816	10.6	115.369	Metabolism > Lipid metabolism > Fatty acid oxidation	Carbamidomethylation; Deamidation (NQ)	Homo sapiens	Tmito	0.0940371	0.395999	2.02738		233846	36737.7	160860	68624	214588	235440	104979	230726	273196	191822
1524	O75521	ECI2	Enoyl-CoA delta isomerase 2	5	3	5	3	43585	10.91	113.978	Metabolism > Lipid metabolism > Fatty acid oxidation	Carbamidomethylation	Homo sapiens	Tmito	0.0773441	0.38343	288.5		77680.3	0	378545	0	91072.6	199888	25622.6	120657	190559	271106
2039	Q9BUP0	EFHD1	EF-hand domain-containing protein D1	3	3	3	3	26928	14.23	94.2177	Signaling > Calcium homeostasis > EF hand proteins	N/A	Homo sapiens	Tmito	0.345394	0.482119	1.35835		629066	153092	367148	133082	253302	384335	356382	432666	376492	358761
2306	Q08426	EHHADH	Peroxisomal bifunctional enzyme	2	2	2	2	79495	3.87	56.1814	Metabolism > Lipid metabolism	Deamidation (NQ)	Homo sapiens	Tpossible_mito	0.227573	0.398767	2.61424		1526360	989472	490268	34491.8	710989	2414310	1838780	1001520	779078	529001
835	P13804	ETFA	Electron transfer flavoprotein subunit alpha, mitochondrial	13	13	13	13	35080	53.45	235.948	Metabolism > Lipid metabolism > Fatty acid oxidation | Metabolism > Amino acid metabolism > Branched-chain amino acid metabolism | Metabolism > Amino acid metabolism > Lysine metabolism | Metabolism > Amino acid metabolism > Glycine metabolism | Metabolism > Vitamin metabolism > Choline and betaine metabolism | Metabolism > Electron carriers > Q-linked reactions, other	Carbamidomethylation	Homo sapiens	Tmito	0.120474	0.395999	2.13865		3223500	711362	2821350	684594	2685390	2411480	1624360	3234520	8509250	3080540
922	P38117	ETFB	Electron transfer flavoprotein subunit beta	10	10	10	10	27844	34.12	153.902	Metabolism > Lipid metabolism > Fatty acid oxidation | Metabolism > Amino acid metabolism > Branched-chain amino acid metabolism | Metabolism > Amino acid metabolism > Lysine metabolism | Metabolism > Amino acid metabolism > Glycine metabolism | Metabolism > Vitamin metabolism > Choline and betaine metabolism | Metabolism > Electron carriers > Q-linked reactions, other	Oxidation (M)	Homo sapiens	Tmito	0.212841	0.395999	1.57009		5134310	1284460	4558960	1688270	3978220	3760410	2182330	5469430	5088120	5963180
1383	O95571	ETHE1	Persulfide dioxygenase ETHE1, mitochondrial	6	6	6	6	27873	40.16	165.851	Metabolism > Sulfur metabolism	Carbamidomethylation	Homo sapiens	Tmito	0.0990823	0.395999	1.67795		2449470	863694	1028340	963810	1842360	1303950	1249240	2754330	2602970	3149500
1816	Q6P587	FAHD1	Acylpyruvase FAHD1, mitochondrial	4	4	4	4	24843	27.23	109.569	Metabolism > Carbohydrate metabolism > TCA-associated	N/A	Homo sapiens	Tmito	0.164746	0.395999	1.75177		329795	93005.5	248753	108589	226229	302739	129297	280105	552085	503258
2304	Q96GK7	FAHD2A	Fumarylacetoacetate hydrolase domain-containing protein 2A	2	2	2	2	34596	7.96	61.5394	0	N/A	Homo sapiens	Tmito	0.620047	0.717225	1.16615		557003	109171	260255	129263	264326	239070	236323	292200	226060	235891
36	P49327	FASN	Fatty acid synthase	88	83	88	83	273427	48.86	408.006	Metabolism > Lipid metabolism	Acetylation (Protein N-term); Carbamidomethylation; Deamidation (NQ); Oxidation (M)	Homo sapiens	Tpossible_mito	0.867893	0.884712	1.04938		93500000	20700000	22200000	35100000	38800000	39400000	34800000	35800000	30700000	42300000
1284	P14324	FDPS	Farnesyl pyrophosphate synthase	6	6	6	6	48275	21.96	164.558	Metabolism > Lipid metabolism > Cholesterol-associated	Carbamidomethylation; Deamidation (NQ); Oxidation (M)	Homo sapiens	Tpossible_mito	0.428277	0.552141	1.20796		3825740	1813710	2523430	2551550	3207220	2307330	2115220	3150220	3058080	6152510
1297	P22570	FDXR	NADPH:adrenodoxin oxidoreductase, mitochondrial	7	5	7	5	53837	14.66	137.793	Metabolism > Lipid metabolism > Cholesterol, bile acid, steroid synthesis | Metabolism > Metals and cofactors > Heme synthesis and processing | Metabolism > Metals and cofactors > Fe-S cluster biosynthesis | Metabolism > Vitamin metabolism > Vitamin D metabolism	Carbamidomethylation	Homo sapiens	Tmito	0.159424	0.395999	1.85522		644498	107940	543880	387501	487346	546659	417882	579079	725418	1547760
338	P07954	FH	Fumarate hydratase, mitochondrial	18	17	18	17	54637	51.76	264.619	Metabolism > Carbohydrate metabolism > TCA cycle	Carbamidomethylation; Deamidation (NQ); Oxidation (M)	Homo sapiens	Tmito	0.259967	0.408457	1.52583		4651580	1124870	4868750	2201040	2913230	2423290	3424060	6514050	5613520	5994460
2106	Q9Y3D6	FIS1	Mitochondrial fission 1 protein	3	3	3	3	16938	22.37	95.9629	Mitochondrial dynamics and surveillance > Fission	Carbamidomethylation	Homo sapiens	Tmito	0.434137	0.554263	1.27111		314896	177729	465007	111578	193855	223087	280191	379173	384664	373442
635	Q96AY3	FKBP10	Peptidyl-prolyl cis-trans isomerase FKBP10	13	13	13	13	64245	28.35	226.697	Protein import, sorting and homeostasis > Protein homeostasis > Chaperones	Carbamidomethylation; Deamidation (NQ); Oxidation (M)	Homo sapiens	Tmito	0.175817	0.395999	1.4786		5874140	2558230	7130190	2480740	5105640	5341920	4244750	6156360	6367760	9978000
1034	P28331	NDUFS1	NADH-ubiquinone oxidoreductase 75 kDa subunit, mitochondrial	9	8	9	8	79467	16.64	185.461	OXPHOS > Complex I > CI subunits | Metabolism > Metals and cofactors > Fe-S-containing proteins | OXPHOS > OXPHOS subunits	Carbamidomethylation	Homo sapiens	Tmito	0.0466493	0.38343	3.33066	1.73581	511207	121302	367181	37510.5	513055	804699	379565	762974	853126	334059
105	P41250	GARS1	Glycine--tRNA ligase	35	35	35	35	83166	56.29	348.77	Mitochondrial central dogma > Translation > mt-tRNA synthetases	Carbamidomethylation; Deamidation (NQ); Oxidation (M)	Homo sapiens	Tpossible_mito	0.746318	0.793095	1.11382		45600000	7561460	18900000	16100000	17200000	33200000	17600000	18800000	15900000	21600000
1705	Q9HC38	GLOD4	Glyoxalase domain-containing protein 4	4	4	4	4	34793	13.42	115.505	0	Carbamidomethylation	Homo sapiens	Tmito	0.624659	0.717403	1.13422		1238520	878218	933282	1355180	908547	1685680	606234	1117350	1595320	2075640
309	O94925	GLS	Glutaminase kidney isoform, mitochondrial	19	18	19	18	73461	42.3	292.718	Metabolism > Amino acid metabolism > Glutamate metabolism	Carbamidomethylation; Deamidation (NQ); Oxidation (M)	Homo sapiens	Tmito	0.260915	0.408457	1.38011		11700000	3062850	7530510	3221380	7009040	8376630	7465930	8363670	7767650	6219440
383	P00367	GLUD1	Glutamate dehydrogenase 1, mitochondrial	23	23	7	7	61398	17.03	262.032	Metabolism > Amino acid metabolism > Glutamate metabolism | Metabolism > Amino acid metabolism > GABA metabolism	Carbamidomethylation; Oxidation (M)	Homo sapiens	Tmito	0.0765252	0.38343	2.30793		4308030	911280	3333280	807562	3802430	3595030	1907810	5604680	5411680	6563190
2241	Q9P0S9	TMEM14C	Transmembrane protein 14C	1	1	1	1	11565	25.89	88.5392	0	Deamidation (NQ)	Homo sapiens	Tmito	0.0104432	0.352911	3.29966	1.72232	131059	32495	44633.2	17759.9	155086	185037	101905	193699	132097	106990
1950	Q9H4A6	GOLPH3	Golgi phosphoprotein 3	3	3	3	3	33811	14.77	84.2035	0	N/A	Homo sapiens	Tmito	0.35314	0.483728	1.83082		23583	3749.97	12168.5	68708.5	11773.6	30770.7	36281.5	16913.5	32981.1	103265
631	P00505	GOT2	Aspartate aminotransferase, mitochondrial	15	14	15	14	47518	40.23	220.179	Metabolism > Carbohydrate metabolism > Malate-aspartate shuttle | Metabolism > Amino acid metabolism > Glutamate metabolism | Metabolism > Amino acid metabolism > Glyoxylate metabolism | Metabolism > Amino acid metabolism > Kynurenine metabolism | Metabolism > Sulfur metabolism	Carbamidomethylation; Deamidation (NQ)	Homo sapiens	Tmito	0.180709	0.395999	1.64455		4785820	1123550	4906870	1543130	3304780	4316940	2572870	5889100	4645410	5118030
882	P43304	GPD2	Glycerol-3-phosphate dehydrogenase, mitochondrial	12	11	12	11	80853	18.29	203.661	Metabolism > Carbohydrate metabolism > Glycerol phosphate shuttle | Metabolism > Electron carriers > Q-linked reactions, other	Carbamidomethylation	Homo sapiens	Tmito	0.145629	0.395999	1.7346		1956560	471421	2281640	588850	2005040	1863200	1145890	1947880	2100230	2145690
1331	P07203	GPX1	Glutathione peroxidase 1	5	5	5	5	22057	32.51	153.001	Metabolism > Detoxification > ROS and glutathione metabolism | Metabolism > Detoxification > Selenoproteins	Carbamidomethylation	Homo sapiens	Tmito	0.20172	0.395999	0.620404		788052	636131	1274100	425094	795290	240692	274128	315140	526371	926830
927	Q9UBQ7	GRHPR	Glyoxylate reductase/hydroxypyruvate reductase	7	6	7	6	35668	31.71	203.787	Metabolism > Amino acid metabolism > Glyoxylate metabolism	Carbamidomethylation; Deamidation (NQ)	Homo sapiens	Tmito	0.315383	0.465184	1.43203		2659100	823276	2592290	648636	1335510	2214000	1325570	2361230	2557530	2573220
1779	Q9H845	ACAD9	Complex I assembly factor ACAD9, mitochondrial	4	4	4	4	68760	13.2	139.262	OXPHOS > Complex I > CI assembly factors | OXPHOS > OXPHOS assembly factors	Carbamidomethylation	Homo sapiens	Tmito	0.0407409	0.38343	2.88812	1.53013	144820	22161.1	55847.4	17574.7	152607	159412	67388.6	114372	85790	201706
1271	P00390	GSR	Glutathione reductase, mitochondrial	6	6	6	6	56257	19.16	141.923	Metabolism > Detoxification > ROS and glutathione metabolism	Carbamidomethylation; Deamidation (NQ)	Homo sapiens	Tmito	0.825494	0.854744	1.07651		1572540	293349	868017	703729	941496	976748	410748	831038	749442	989606
1298	Q9Y2Q3	GSTK1	Glutathione S-transferase kappa 1	6	6	6	6	25497	34.07	143.093	Metabolism > Detoxification > Xenobiotic metabolism	N/A	Homo sapiens	Tmito	0.851599	0.878316	1.06313		515200	896208	1794990	964350	623455	806477	587944	1284970	1455490	1865940
2998	Q8N442	GUF1	Translation factor GUF1, mitochondrial	1	1	1	1	74328	1.79	49.4575	Mitochondrial central dogma > Translation	N/A	Homo sapiens	Tmito	0.0785314	0.38343	0.00128952		202922	0	94485.9	39875.4	0	97203.1	0	0	0	0
1740	Q16774	GUK1	Guanylate kinase	4	4	4	4	21726	29.95	97.7053	Metabolism > Nucleotide metabolism > Nucleotide synthesis and processing	Acetylation (Protein N-term); Carbamidomethylation	Homo sapiens	Tmito	0.28246	0.43295	1.8693		675752	150974	464207	38225.6	194671	452759	363495	511184	394216	509009
1681	Q16836	HADH	Hydroxyacyl-coenzyme A dehydrogenase, mitochondrial	4	4	4	4	34294	20.7	122.239	Metabolism > Lipid metabolism > Fatty acid oxidation | Metabolism > Amino acid metabolism > Lysine metabolism	Oxidation (M)	Homo sapiens	Tmito	0.148526	0.395999	1.73325		424020	97594.1	460769	119370	363805	319768	268605	425714	493853	448143
203	P40939	HADHA	Trifunctional enzyme subunit alpha, mitochondrial	31	30	31	30	83000	50.98	322.469	Metabolism > Lipid metabolism > Fatty acid oxidation | Metabolism > Lipid metabolism > Cardiolipin synthesis | Metabolism > Amino acid metabolism > Branched-chain amino acid metabolism	Carbamidomethylation; Deamidation (NQ); Oxidation (M)	Homo sapiens	Tmito	0.656785	0.743983	1.1212		12700000	9716220	12600000	4520150	13100000	10500000	7604960	9000570	7626230	16300000
497	P55084	HADHB	Trifunctional enzyme subunit beta, mitochondrial	17	17	17	17	51294	44.73	236.006	Metabolism > Carbohydrate metabolism > Ketone metabolism | Metabolism > Lipid metabolism > Fatty acid oxidation | Metabolism > Amino acid metabolism > Lysine metabolism	Carbamidomethylation; Deamidation (NQ); Oxidation (M)	Homo sapiens	Tmito	0.662107	0.743983	1.11476		8686860	4069940	3057830	6624990	4107910	8358540	4111430	5492100	6575760	7215000
1434	Q9NRV9	HEBP1	Heme-binding protein 1	6	6	6	6	21097	41.8	198.991	0	N/A	Homo sapiens	Tmito	0.486073	0.589111	1.1866		3173820	1673120	3571990	1269380	1878460	3405980	2111190	2888200	2481060	3407320
1233	P31937	HIBADH	3-hydroxyisobutyrate dehydrogenase, mitochondrial	7	7	7	7	35329	26.79	186.907	Metabolism > Amino acid metabolism > Branched-chain amino acid metabolism	Carbamidomethylation	Homo sapiens	Tmito	0.864491	0.884712	1.06682		4189210	5295740	1185530	3223420	3303300	4287660	3662870	1219710	5247210	3465800
2863	Q9BX68	HINT2	Adenosine 5'-monophosphoramidase HINT2	1	1	1	1	17162	9.82	46.4968	Metabolism > Lipid metabolism > Cholesterol, bile acid, steroid synthesis	N/A	Homo sapiens	Tmito	0.65926	0.743983	0.166934		0	91263.5	0	47167.8	162189	0	0	0	0	37684.9
1960	P35914	HMGCL	Hydroxymethylglutaryl-CoA lyase, mitochondrial	3	3	3	3	34360	11.69	114.83	Metabolism > Carbohydrate metabolism > Ketone metabolism | Metabolism > Amino acid metabolism > Branched-chain amino acid metabolism	Carbamidomethylation	Homo sapiens	Tmito	0.468227	0.572761	0.74718		193361	617224	282328	137288	191717	216396	65389.1	281915	240898	297152
621	Q99714	HSD17B10	3-hydroxyacyl-CoA dehydrogenase type-2	12	11	12	11	26923	72.41	244.152	Mitochondrial central dogma > mtRNA metabolism > mtRNA granules | Mitochondrial central dogma > mtRNA metabolism > Polycistronic mtRNA processing | Mitochondrial central dogma > mtRNA metabolism > mt-tRNA modifications | Metabolism > Lipid metabolism > Fatty acid oxidation | Metabolism > Lipid metabolism > Cholesterol, bile acid, steroid synthesis | Metabolism > Amino acid metabolism > Branched-c…	Carbamidomethylation; Deamidation (NQ); Oxidation (M)	Homo sapiens	Tmito	0.075657	0.38343	1.76593		2571360	545132	1342540	850742	1682240	1550520	1892410	2500370	2147550	2317900
615	P51659	HSD17B4	Peroxisomal multifunctional enzyme type 2	17	17	17	17	79686	28.94	236.104	Metabolism > Lipid metabolism	Carbamidomethylation	Homo sapiens	Tpossible_mito	0.254669	0.403482	1.97556		2926060	852438	3446840	961397	2256900	2594100	1706370	2559500	2546000	21700000
1767	Q6YN16	HSDL2	Hydroxysteroid dehydrogenase-like protein 2	4	4	4	4	45395	12.2	105.988	0	Carbamidomethylation	Homo sapiens	Tmito	0.250043	0.401451	22.0767		289663	0	184366	183617	329654	143966	28228.2	259118	631432	512869
1759	P10515	DLAT	Dihydrolipoyllysine-residue acetyltransferase component of pyruvate dehydrogenase complex, mitochondrial	4	4	4	4	68997	7.11	108.953	Metabolism > Carbohydrate metabolism > Pyruvate metabolism	Carbamidomethylation	Homo sapiens	Tmito	0.0229294	0.38343	2.54149	1.34568	387298	100638	186842	79620.7	343998	396935	210437	469060	516816	540173
1666	P09417	QDPR	Dihydropteridine reductase	4	3	4	3	25789	16.8	127.972	Metabolism > Metals and cofactors > Tetrahydrobiopterin synthesis | Metabolism > Vitamin metabolism > Folate and 1-C metabolism	Carbamidomethylation	Homo sapiens	Tmito	0.0379181	0.38343	2.48992	1.3161	707100	142467	224327	191049	440349	458105	680378	894675	1341270	410448
1613	P61604	HSPE1	10 kDa heat shock protein, mitochondrial	5	5	5	5	10932	51.96	138.304	Protein import, sorting and homeostasis > Protein homeostasis > Chaperones	N/A	Homo sapiens	Tmito	0.194781	0.395999	1.79689		3026940	734971	2604030	545212	1180560	1988090	1913980	3581860	3733170	3145690
1097	Q9NSE4	IARS2	Isoleucine--tRNA ligase, mitochondrial	9	9	9	9	113792	10.28	156.833	Mitochondrial central dogma > Translation > mt-tRNA synthetases	Carbamidomethylation	Homo sapiens	Tmito	0.150645	0.395999	2.06362		955694	74912.2	374170	334841	698352	816994	304931	724814	749022	694597
1753	P14735	IDE	Insulin-degrading enzyme	4	4	4	4	117968	5.2	105.699	Protein import, sorting and homeostasis > Protein homeostasis > Proteases	N/A	Homo sapiens	Tmito	0.0700686	0.38343	0.527657		594717	350504	150529	373402	299297	235262	97108.6	138867	147913	194892
369	P48735	IDH2	Isocitrate dehydrogenase [NADP], mitochondrial	21	21	19	19	50909	43.58	265.655	Metabolism > Carbohydrate metabolism > TCA cycle	Carbamidomethylation; Deamidation (NQ); Oxidation (M)	Homo sapiens	Tmito	0.245789	0.401451	1.39982		13600000	4902790	6036260	3204510	8631720	9010720	7358460	7149180	12800000	6654010
2481	Q9Y3D9	MRPS23	28S ribosomal protein S23, mitochondrial	1	1	1	1	21771	5.26	59.1661	Mitochondrial central dogma > Translation > Mitochondrial ribosome	N/A	Homo sapiens	Tmito	0.013363	0.38343	2.40823	1.26797	19303.6	14220.6	35391.3	8459.5	32430.6	25688.5	51572.8	42536.4	51969.7	48390.1
1972	O43837	IDH3B	Isocitrate dehydrogenase [NAD] subunit beta, mitochondrial	3	3	3	3	42184	9.87	87.4822	Metabolism > Carbohydrate metabolism > TCA cycle	N/A	Homo sapiens	Tmito	0.158479	0.395999	34.0665		211183	15549.1	125444	0	148229	81711.7	213467	212583	142451	166897
2042	Q13907	IDI1	Isopentenyl-diphosphate Delta-isomerase 1	2	2	2	2	26319	13.66	75.5085	Metabolism > Lipid metabolism > Cholesterol-associated	Deamidation (NQ)	Homo sapiens	Tpossible_mito	0.245334	0.401451	33.7326		0	0	0	0	0	12114.6	0	0	0	121617
292	Q16891	IMMT	MICOS complex subunit MIC60	27	27	27	27	83678	39.97	244.343	Mitochondrial dynamics and surveillance > Cristae formation > MICOS complex	N/A	Homo sapiens	Tmito	0.0787272	0.38343	1.66121		7119380	2560750	5672590	2693380	6804360	5137010	4747340	6795960	8813830	9829270
2339	P26440	IVD	Isovaleryl-CoA dehydrogenase, mitochondrial	2	2	2	2	46651	4.46	62.2712	Metabolism > Amino acid metabolism > Branched-chain amino acid metabolism	N/A	Homo sapiens	Tmito	0.0683471	0.38343	4.01856		262391	7047.69	196186	79962.1	261742	423773	206893	289794	339312	291607
847	Q15046	KARS1	Lysine--tRNA ligase	11	10	11	10	68048	16.08	168.4	Mitochondrial central dogma > Translation > mt-tRNA synthetases	Carbamidomethylation	Homo sapiens	Tmito	0.316874	0.465184	1.36081		1706700	312182	770295	766396	833718	1327630	1079800	1071770	840886	1039960
1450	P50213	IDH3A	Isocitrate dehydrogenase [NAD] subunit alpha, mitochondrial	6	6	6	6	39592	20.22	144.501	Metabolism > Carbohydrate metabolism > TCA cycle	Carbamidomethylation	Homo sapiens	Tmito	0.0410954	0.38343	2.34371	1.2288	1259630	301919	1105860	284525	1126520	1232070	929986	1640330	2008800	1613000
323	P28838	LAP3	Cytosol aminopeptidase	22	18	22	18	56166	43.74	259.891	Protein import, sorting and homeostasis > Protein homeostasis > Proteases	Carbamidomethylation; Deamidation (NQ)	Homo sapiens	Tmito	0.745674	0.793095	1.08486		6788850	2580830	5254470	2213610	2901700	4792750	3433190	4301820	4366920	5287500
381	P07195	LDHB	L-lactate dehydrogenase B chain	20	20	19	19	36638	52.69	289.337	Metabolism > Amino acid metabolism > Glyoxylate metabolism	Carbamidomethylation; Deamidation (NQ); Oxidation (M)	Homo sapiens	Tpossible_mito	0.426506	0.552141	1.17944		24400000	8473630	16600000	16400000	13700000	18400000	16400000	22700000	17900000	21400000
2181	P82930	MRPS34	28S ribosomal protein S34, mitochondrial	2	2	2	2	25650	10.09	82.7192	Mitochondrial central dogma > Translation > Mitochondrial ribosome	N/A	Homo sapiens	Tmito	0.0192244	0.38343	2.3159	1.21157	113749	33445.7	83362.2	26429.9	110037	101574	121301	145289	136670	139077
730	P36776	LONP1	Lon protease homolog, mitochondrial	13	13	13	13	106489	21.38	207.971	Protein import, sorting and homeostasis > Protein homeostasis > Proteases	Carbamidomethylation; Deamidation (NQ)	Homo sapiens	Tmito	0.11209	0.395999	2.54656		2464040	116353	722047	444077	995810	1920200	979875	1380740	1445210	2033120
422	P42704	LRPPRC	Leucine-rich PPR motif-containing protein, mitochondrial	23	21	23	21	157905	18.87	251.098	Mitochondrial central dogma > mtRNA metabolism > mtRNA stability and decay | Mitochondrial central dogma > Translation	Carbamidomethylation; Oxidation (M)	Homo sapiens	Tmito	0.699428	0.766456	0.829901		2115540	10000000	1380910	674628	1277780	1893960	2044750	1727310	1414980	2363450
2562	O75608	LYPLA1	Acyl-protein thioesterase 1	1	1	1	1	24670	6.09	58.2034	Metabolism > Lipid metabolism | Signaling	Carbamidomethylation	Homo sapiens	Tpossible_mito	0.24778	0.401451	14.9403		72946.3	43497.7	55115	0	30161.8	47702.6	63394.3	55795.9	62162.9	81297.3
2607	Q9BQ69	MACROD1	ADP-ribose glycohydrolase MACROD1	1	1	1	1	35505	4.31	71.0644	Signaling	Carbamidomethylation	Homo sapiens	Tmito	0.0604244	0.38343	721.075		0	0	21994.8	0	0	74340.8	55330.3	55742.3	34972.3	57182.8
1815	Q8NE86	MCU	Calcium uniporter protein, mitochondrial	4	4	4	4	39867	16.81	119.156	Signaling > Calcium homeostasis > Calcium cycle | Small molecule transport > Calcium uniporter	Carbamidomethylation	Homo sapiens	Tmito	0.0589669	0.38343	491.035		406472	0	103804	0	215260	321390	79475.4	426701	279265	185427
363	P40926	MDH2	Malate dehydrogenase, mitochondrial	18	18	18	18	35503	64.79	277.887	Metabolism > Carbohydrate metabolism > Gluconeogenesis | Metabolism > Carbohydrate metabolism > Malate-aspartate shuttle | Metabolism > Carbohydrate metabolism > TCA cycle	Carbamidomethylation; Deamidation (NQ); Oxidation (M)	Homo sapiens	Tmito	0.616345	0.717225	1.20589		52200000	8520880	23800000	15700000	20800000	18500000	14400000	32900000	40100000	28500000
2262	P23368	ME2	NAD-dependent malic enzyme, mitochondrial	2	2	2	2	65444	3.94	85.4708	Metabolism > Carbohydrate metabolism > TCA-associated	N/A	Homo sapiens	Tmito	0.290926	0.434394	11.8557		48776.3	0	41203.9	77536.2	26830.6	19768.9	35713.8	79561.8	27957.4	128200
2017	P10620	MGST1	Microsomal glutathione S-transferase 1	3	3	3	3	17599	19.35	135.233	Metabolism > Detoxification > Xenobiotic metabolism | Metabolism > Detoxification > ROS and glutathione metabolism	Carbamidomethylation	Homo sapiens	Tpossible_mito	0.478632	0.582779	1.54079		2052540	3211960	1826500	689757	724655	1540310	9044990	1900200	9065610	1841590
1114	O14880	MGST3	Microsomal glutathione S-transferase 3	5	5	5	5	16516	34.21	185.263	Metabolism > Lipid metabolism > Eicosanoid metabolism	Carbamidomethylation; Deamidation (NQ); Oxidation (M)	Homo sapiens	Tmito	0.288199	0.434394	1.72726		4683680	930084	2336320	336676	2539760	1925780	1389870	3185810	2407720	3230170
1574	P25325	MPST	3-mercaptopyruvate sulfurtransferase	3	3	3	3	33178	15.15	121.886	Metabolism > Detoxification > Xenobiotic metabolism | Metabolism > Sulfur metabolism	Carbamidomethylation; Deamidation (NQ)	Homo sapiens	Tmito	0.183298	0.395999	1.89995		547192	193860	607983	61421.8	340208	500874	369047	535087	610987	570435
1453	P08574	CYC1	Cytochrome c1, heme protein, mitochondrial	6	6	6	6	35422	26.15	156.174	OXPHOS > Complex III > CIII subunits | Metabolism > Metals and cofactors > Heme-containing proteins | Metabolism > Electron carriers > Cytochromes | OXPHOS > OXPHOS subunits	Carbamidomethylation	Homo sapiens	Tmito	0.0370106	0.38343	2.11174	1.07843	3428430	1173980	2875670	846050	3968580	3361030	2469020	3830550	3956600	5444610
3035	Q92552	MRPS27	28S ribosomal protein S27, mitochondrial	1	1	1	1	47611	2.66	44.9986	Mitochondrial central dogma > Translation > Mitochondrial ribosome	N/A	Homo sapiens	Tmito	0.642675	0.731703	0.7278		15690.3	423891	254440	123665	102274	43736.6	179849	76899.5	42031.3	173033
457	Q6NUK1	SLC25A24	Calcium-binding mitochondrial carrier protein SCaMC-1	18	17	18	17	53354	42.14	238.359	Metabolism > Nucleotide metabolism > Nucleotide import | Signaling > Calcium homeostasis > EF hand proteins | Small molecule transport > SLC25A family	Carbamidomethylation; Oxidation (M)	Homo sapiens	Tmito	0.0429709	0.38343	2.09129	1.0644	4465630	1066880	2754900	1045570	4196180	3529460	2752420	4274750	4814180	5069470
1160	P00403	MT-CO2	Cytochrome c oxidase subunit 2	4	4	4	4	25565	24.67	139.111	OXPHOS > Complex IV > CIV subunits | OXPHOS > OXPHOS subunits	Deamidation (NQ); Oxidation (M)	Homo sapiens	Tmito	0.164139	0.395999	1.8425		1861710	777450	2068640	379215	836679	1600840	2007340	3245140	2799990	1937600
2531	P00156	MT-CYB	Cytochrome b	1	1	1	1	42718	2.37	50.1567	OXPHOS > Complex III > CIII subunits | Metabolism > Metals and cofactors > Heme-containing proteins | Metabolism > Electron carriers > Cytochromes | OXPHOS > OXPHOS subunits	N/A	Homo sapiens	Tmito	0.745482	0.793095	2.89176		181277	52435.3	8847.31	0	56504.2	203942	42349.4	36283.7	0	25468
2182	Q9NZJ7	MTCH1	Mitochondrial carrier homolog 1	2	2	2	2	41544	5.91	70.8315	Small molecule transport > SLC25A family	N/A	Homo sapiens	Tmito	0.194809	0.395999	2.63015		162045	3873.33	84162.7	25477.1	50868.4	133236	58216.3	144460	89694.5	101097
852	Q9Y6C9	MTCH2	Mitochondrial carrier homolog 2	9	9	9	9	33331	39.6	201.219	Small molecule transport > SLC25A family | Mitochondrial dynamics and surveillance > Fusion	Carbamidomethylation; Deamidation (NQ)	Homo sapiens	Tmito	0.249231	0.401451	1.605		6232250	1361500	2271300	907922	3739870	3269050	1554050	3923580	4070380	4123580
2283	Q6UB35	MTHFD1L	Monofunctional C1-tetrahydrofolate synthase, mitochondrial	2	2	2	2	105790	2.25	55.9177	Metabolism > Vitamin metabolism > Folate and 1-C metabolism	N/A	Homo sapiens	Tmito	0.291626	0.434394	1.70649		225434	33643.6	79419.4	19906.2	98485.8	181396	59693.4	64941.5	106182	139438
2765	O75431	MTX2	Metaxin-2	1	1	1	1	29763	8.37	48.0264	Protein import, sorting and homeostasis > Protein import and sorting > SAM | Mitochondrial dynamics and surveillance > Intramitochondrial membrane interactions	N/A	Homo sapiens	Tmito	0.0520148	0.38343	285.568		46701.3	0	47158.8	0	27128.3	60843	30435.2	123341	139156	65009
3110	Q8NCW5	NAXE	NAD(P)H-hydrate epimerase	1	1	1	1	31675	4.17	56.9071	Metabolism > Metals and cofactors > NAD biosynthesis and metabolism	N/A	Homo sapiens	Tmito	0.211187	0.395999	19.3923		67769.3	37284.1	70334.8	0	34307.7	79340.5	50686.3	58157.8	104982	149578
1975	O95299	NDUFA10	NADH dehydrogenase [ubiquinone] 1 alpha subcomplex subunit 10, mitochondrial	2	2	2	2	40751	10.42	107.127	OXPHOS > Complex I > CI subunits | OXPHOS > OXPHOS subunits	Deamidation (NQ)	Homo sapiens	Tmito	0.058624	0.38343	3.53241		254985	35025.2	141807	12214.1	272096	286428	137065	283050	275712	141786
2170	Q9P0J0	NDUFA13	NADH dehydrogenase [ubiquinone] 1 alpha subcomplex subunit 13	2	2	2	2	16698	15.97	71.1932	OXPHOS > Complex I > CI subunits | OXPHOS > OXPHOS subunits	N/A	Homo sapiens	Tmito	0.348299	0.482119	1.28149		774138	438292	999784	687732	1138780	950860	1437700	533551	1094670	548856
1990	O00483	NDUFA4	Cytochrome c oxidase subunit NDUFA4	3	3	3	3	9370	37.04	90.7536	OXPHOS > Complex IV > CIV subunits | OXPHOS > OXPHOS subunits	Carbamidomethylation	Homo sapiens	Tmito	0.169205	0.395999	38.1366		219854	0	335162	58127	92991.9	325077	331130	450640	471889	405141
2924	P56556	NDUFA6	NADH dehydrogenase [ubiquinone] 1 alpha subcomplex subunit 6	1	1	1	1	15137	12.5	47.9806	OXPHOS > Complex I > CI subunits | OXPHOS > OXPHOS subunits	N/A	Homo sapiens	Tmito	0.267107	0.413231	68.7383		85654.5	0	54602.5	0	0	57209	83603.6	253833	316882	87700.7
1831	P51970	NDUFA8	NADH dehydrogenase [ubiquinone] 1 alpha subcomplex subunit 8	4	4	4	4	20105	25.58	106.771	OXPHOS > Complex I > CI subunits | OXPHOS > OXPHOS subunits	Carbamidomethylation	Homo sapiens	Tmito	0.121104	0.395999	2.75234		514847	178695	578188	29464.1	498956	383163	504298	993157	803201	350726
1877	Q16795	NDUFA9	NADH dehydrogenase [ubiquinone] 1 alpha subcomplex subunit 9, mitochondrial	3	3	3	3	42510	13	84.1832	OXPHOS > Complex I > CI subunits | OXPHOS > OXPHOS subunits	N/A	Homo sapiens	Tmito	0.0938539	0.395999	1.84313		188204	129552	129430	82977.1	347039	305514	82615.3	344913	318986	172378
2735	Q9P032	NDUFAF4	NADH dehydrogenase [ubiquinone] 1 alpha subcomplex assembly factor 4	1	1	1	1	20266	8	49.0382	OXPHOS > Complex I > CI assembly factors | OXPHOS > OXPHOS assembly factors	N/A	Homo sapiens	Tmito	0.779335	0.816879	2.40899		33556.4	21600.8	70892.6	0	19476.5	52468.5	0	36379.4	41377.9	46799.7
2479	O96000	NDUFB10	NADH dehydrogenase [ubiquinone] 1 beta subcomplex subunit 10	1	1	1	1	20777	8.14	62.1388	OXPHOS > Complex I > CI subunits | OXPHOS > OXPHOS subunits	N/A	Homo sapiens	Tmito	0.0935292	0.395999	2.53267		444668	151188	456023	37043.5	346062	434841	442490	673402	615995	365687
2219	P17568	NDUFB7	NADH dehydrogenase [ubiquinone] 1 beta subcomplex subunit 7	2	1	2	1	16402	7.3	63.4882	OXPHOS > Complex I > CI subunits | OXPHOS > OXPHOS subunits	N/A	Homo sapiens	Tmito	0.779607	0.816879	2.84196		0	0	42266.4	0	70516.9	0	0	0	64924.2	0
111	P10809	HSPD1	60 kDa heat shock protein, mitochondrial	39	39	39	39	61055	69.11	372.758	Protein import, sorting and homeostasis > Protein homeostasis > Chaperones	Acetylation (Protein N-term); Carbamidomethylation; Deamidation (NQ); Oxidation (M)	Homo sapiens	Tmito	0.0107349	0.352911	1.95922	0.970278	25500000	12200000	22000000	10900000	31000000	27000000	23300000	41800000	35700000	39600000
1689	Q9Y6M9	NDUFB9	NADH dehydrogenase [ubiquinone] 1 beta subcomplex subunit 9	4	4	4	4	21831	32.4	116.705	OXPHOS > Complex I > CI subunits | OXPHOS > OXPHOS subunits	Acetylation (Protein N-term)	Homo sapiens	Tmito	0.708832	0.773539	0.856763		3524700	4401670	5479040	5168050	3865660	4468240	3238700	1032300	6243970	10100000
2827	O95298	NDUFC2	NADH dehydrogenase [ubiquinone] 1 subunit C2	1	1	1	1	14188	10.08	61.4574	OXPHOS > Complex I > CI subunits | OXPHOS > OXPHOS subunits	N/A	Homo sapiens	Tmito	0.23155	0.398767	18.9406		110611	92370.7	68622.9	0	89494.6	53711.3	57864.6	214659	172059	83440.1
535	P02794	FTH1	Ferritin heavy chain	12	12	12	12	21226	63.39	250.068	Metabolism > Metals and cofactors > Iron homeostasis	Carbamidomethylation; Deamidation (NQ); Oxidation (M)	Homo sapiens	Tpossible_mito	0.0312246	0.38343	1.95676	0.968467	11200000	6574240	11700000	5886090	10900000	13000000	11100000	21900000	18800000	31300000
1983	O75306	NDUFS2	NADH dehydrogenase [ubiquinone] iron-sulfur protein 2, mitochondrial	3	3	3	3	52546	10.58	108.687	OXPHOS > Complex I > CI subunits | Metabolism > Metals and cofactors > Fe-S-containing proteins | OXPHOS > OXPHOS subunits	N/A	Homo sapiens	Tmito	0.340141	0.479453	1.2028		6636470	2584040	3434960	2679490	3596940	4393190	3882830	4347660	4899170	4594410
1576	O75489	NDUFS3	NADH dehydrogenase [ubiquinone] iron-sulfur protein 3, mitochondrial	5	5	5	5	30242	19.7	154.504	OXPHOS > Complex I > CI subunits | OXPHOS > OXPHOS subunits	N/A	Homo sapiens	Tmito	0.201303	0.395999	34.1099		542985	112128	583565	0	549995	459161	246561	714705	503448	470801
3021	O43920	NDUFS5	NADH dehydrogenase [ubiquinone] iron-sulfur protein 5	1	1	1	1	12517	11.32	50.5619	OXPHOS > Complex I > CI subunits | OXPHOS > OXPHOS subunits	Carbamidomethylation	Homo sapiens	Tmito	0.283146	0.43295	40.7947		40648.1	0	19539.1	0	35935.8	21883.9	44823	63562.4	46045.4	0
2272	O75251	NDUFS7	NADH dehydrogenase [ubiquinone] iron-sulfur protein 7, mitochondrial	2	2	2	2	23564	10.8	74.513	OXPHOS > Complex I > CI subunits | Metabolism > Metals and cofactors > Fe-S-containing proteins | OXPHOS > OXPHOS subunits	Oxidation (M)	Homo sapiens	Tmito	0.228326	0.398767	1.96752		326366	104926	127139	15039.3	172393	197564	167233	237709	161243	140794
1996	O00217	NDUFS8	NADH dehydrogenase [ubiquinone] iron-sulfur protein 8, mitochondrial	3	2	3	2	23705	12.86	119.512	OXPHOS > Complex I > CI subunits | Metabolism > Metals and cofactors > Fe-S-containing proteins | OXPHOS > OXPHOS subunits	Carbamidomethylation	Homo sapiens	Tmito	0.0647156	0.38343	2.49837		126094	56078.8	132557	13905.1	146999	182351	106484	178109	158022	142440
1993	P49821	NDUFV1	NADH dehydrogenase [ubiquinone] flavoprotein 1, mitochondrial	3	3	3	3	50817	10.13	99.3769	OXPHOS > Complex I > CI subunits | Metabolism > Metals and cofactors > Fe-S-containing proteins | OXPHOS > OXPHOS subunits	N/A	Homo sapiens	Tmito	0.206309	0.395999	29.8653		618670	108908	209202	0	472176	358769	290746	371110	298666	217526
2419	P19404	NDUFV2	NADH dehydrogenase [ubiquinone] flavoprotein 2, mitochondrial	2	2	2	2	27392	9.24	59.8627	OXPHOS > Complex I > CI subunits | Metabolism > Metals and cofactors > Fe-S-containing proteins | OXPHOS > OXPHOS subunits	N/A	Homo sapiens	Tmito	0.205079	0.395999	2.47061		141783	43756.9	223611	6689.59	88775.3	89219.9	109171	208521	234329	152171
2327	Q9BPW8	NIPSNAP1	Protein NipSnap homolog 1	2	2	2	2	33310	8.1	85.9195	Mitochondrial dynamics and surveillance > Mitophagy | Mitochondrial dynamics and surveillance > Autophagy	Oxidation (M)	Homo sapiens	Tmito	0.368647	0.497201	1.79924		57190.3	63048	217231	415694	101463	154802	233370	153447	236437	1498890
2295	O75323	NIPSNAP2	Protein NipSnap homolog 2	2	1	2	1	33743	3.15	65.3018	Mitochondrial dynamics and surveillance > Mitophagy | Mitochondrial dynamics and surveillance > Autophagy	N/A	Homo sapiens	Tmito	0.11181	0.395999	301.797		0	0	0	0	51856.8	0	0	113649	128208	0
1833	Q9UFN0	NIPSNAP3A	Protein NipSnap homolog 3A	4	4	4	4	28467	24.7	117.24	0	N/A	Homo sapiens	Tmito	0.209538	0.395999	2.14258		453023	38987.5	149973	29942.4	233365	280716	79175.3	315991	215690	193303
1959	Q9NQR4	NIT2	Omega-amidase NIT2	3	3	3	3	30608	13.41	109.661	Metabolism > Detoxification	Carbamidomethylation	Homo sapiens	Tpossible_mito	0.350443	0.482548	1.80826		359233	23668.6	131122	688605	209421	335584	253714	421003	253615	390594
1845	Q9BYT8	NLN	Neurolysin, mitochondrial	4	3	4	3	80652	5.26	101.034	Protein import, sorting and homeostasis > Protein homeostasis > Proteases	N/A	Homo sapiens	Tmito	0.453776	0.559698	1.51158		467448	34684.4	238718	114437	125429	321982	98184.6	280020	409128	244766
956	Q13423	NNT	NAD(P) transhydrogenase, mitochondrial	11	9	11	9	113896	11.51	197.017	Metabolism > Metals and cofactors > NAD biosynthesis and metabolism	Carbamidomethylation	Homo sapiens	Tmito	0.745412	0.793095	1.14618		2757590	303140	663458	540355	953412	642226	524240	1053100	875070	1257490
600	O75390	CS	Citrate synthase, mitochondrial	16	16	16	16	51712	48.5	234.53	Metabolism > Carbohydrate metabolism > TCA cycle	Carbamidomethylation; Deamidation (NQ); Oxidation (M)	Homo sapiens	Tmito	0.0425763	0.38343	1.8792	0.910116	9554900	2878910	6646180	3145860	13000000	10200000	6193740	9820450	8848920	8510640
3149	P50583	NUDT2	Bis(5'-nucleosyl)-tetraphosphatase [asymmetrical]	1	1	1	1	16829	5.44	49.4507	Metabolism > Nucleotide metabolism > Nucleotide synthesis and processing	Carbamidomethylation	Homo sapiens	Tpossible_mito	0.374103	0.498454	19.0578		39980.6	0	26707.4	0	10961.5	0	21795.7	16790.4	28237.2	14758.1
751	P04181	OAT	Ornithine aminotransferase, mitochondrial	13	13	13	13	48535	38.04	223.055	Metabolism > Amino acid metabolism > Proline metabolism	N/A	Homo sapiens	Tmito	0.747861	0.793095	1.10071		3888840	1451110	2756540	873195	2801340	2527540	1525490	2125930	1707830	2270170
3135	Q9NX40	OCIAD1	OCIA domain-containing protein 1	1	1	1	1	27626	5.31	76.321	0	Carbamidomethylation	Homo sapiens	Tmito	1	1	1		0	0	0	0	0	0	0	0	0	0
707	Q02218	OGDH	2-oxoglutarate dehydrogenase complex component E1	14	13	9	9	115935	10.85	192.365	Metabolism > Carbohydrate metabolism > TCA cycle	Carbamidomethylation; Deamidation (NQ)	Homo sapiens	Tmito	0.329812	0.472929	1.40348		1396050	285497	794754	398419	1019280	715218	499005	1109440	729645	1163570
1333	O95202	LETM1	Mitochondrial proton/calcium exchanger protein	7	7	7	7	83354	12.72	158.109	Signaling > Calcium homeostasis > Calcium cycle	Carbamidomethylation	Homo sapiens	Tmito	0.0359385	0.38343	1.81406	0.859221	725166	360999	673539	287040	717973	821452	528555	1081970	1129320	1065300
1718	O60313	OPA1	Dynamin-like 120 kDa protein, mitochondrial	4	3	4	3	111631	3.85	123.224	Mitochondrial dynamics and surveillance > Fusion | Mitochondrial dynamics and surveillance > Cristae formation	N/A	Homo sapiens	Tmito	0.927917	0.935027	0.919273		672142	30096.7	422911	6476750	450220	329936	226902	436118	731339	732202
1664	P55809	OXCT1	Succinyl-CoA:3-ketoacid coenzyme A transferase 1, mitochondrial	5	5	5	5	56158	19.04	158.791	Metabolism > Carbohydrate metabolism > Ketone metabolism	N/A	Homo sapiens	Tmito	0.187681	0.395999	28.4148		314659	0	86333.8	35902.5	107495	198471	52415.6	271311	226955	232827
462	P22234	PAICS	Bifunctional phosphoribosylaminoimidazole carboxylase/phosphoribosylaminoimidazole succinocarboxamide synthetase	16	15	16	15	47079	43.29	249.366	Metabolism > Nucleotide metabolism > Nucleotide synthesis and processing	Acetylation (Protein N-term); Carbamidomethylation; Deamidation (NQ); Oxidation (M)	Homo sapiens	Tmito	0.448056	0.559698	1.23956		4412060	1415760	2147510	2549150	2362850	3660840	5973610	2613720	2226460	2412260
937	Q99497	PARK7	Parkinson disease protein 7	9	9	9	9	19891	61.38	238.514	Protein import, sorting and homeostasis > Protein homeostasis | Mitochondrial dynamics and surveillance > Mitophagy | Mitochondrial dynamics and surveillance > Autophagy	Carbamidomethylation	Homo sapiens	Tmito	0.794069	0.825455	1.04886		6699710	3241160	6247370	3889240	4008730	4909220	4110070	5247610	5324340	7139640
2591	P11498	PC	Pyruvate carboxylase, mitochondrial	1	1	1	1	129634	0.85	47.4907	Metabolism > Carbohydrate metabolism > Gluconeogenesis | Metabolism > Carbohydrate metabolism > TCA-associated | Metabolism > Vitamin metabolism > Biotin utilizing proteins	N/A	Homo sapiens	Tmito	0.446813	0.559698	6.739		0	0	0	0	0	93664.1	0	0	0	0
2695	P05165	PCCA	Propionyl-CoA carboxylase alpha chain, mitochondrial	1	1	1	1	80059	1.37	57.2358	Metabolism > Carbohydrate metabolism > Propanoate metabolism | Metabolism > Lipid metabolism > Fatty acid oxidation | Metabolism > Vitamin metabolism > Biotin utilizing proteins	N/A	Homo sapiens	Tmito	0.557659	0.661428	0.0779613		401267	176025	18959.7	0	0	257176	333881	128147	0	0
385	Q16822	PCK2	Phosphoenolpyruvate carboxykinase [GTP], mitochondrial	21	21	21	21	70699	42.66	271.452	Metabolism > Carbohydrate metabolism > Gluconeogenesis | Metabolism > Carbohydrate metabolism > TCA-associated	Carbamidomethylation; Oxidation (M)	Homo sapiens	Tmito	0.292349	0.434394	1.50087		5732120	1458690	6133650	2366360	6329180	8584240	4734420	3941550	2366200	6369950
1551	P08559	PDHA1	Pyruvate dehydrogenase E1 component subunit alpha, somatic form, mitochondrial	5	4	5	4	43296	9.49	109.823	Metabolism > Carbohydrate metabolism > Pyruvate metabolism	N/A	Homo sapiens	Tmito	0.159113	0.395999	1.4795		382778	114785	245012	165614	243588	239176	267537	507799	356556	279766
1618	P11177	PDHB	Pyruvate dehydrogenase E1 component subunit beta, mitochondrial	5	5	5	5	39233	17.27	137.852	Metabolism > Carbohydrate metabolism > Pyruvate metabolism	Oxidation (M)	Homo sapiens	Tmito	0.0527187	0.38343	2.47829		858163	138262	499426	119885	692956	609785	508012	899821	794266	904263
2855	O96011	PEX11B	Peroxisomal membrane protein 11B	1	1	1	1	28431	3.47	42.8204	0	N/A	Homo sapiens	Tpossible_mito	0.671792	0.743983	0.378368		10639.8	12169.6	47732.2	11484.8	32757.4	17005.6	0	45321.9	38566.3	56987.8
479	P35232	PHB1	Prohibitin 1	19	19	19	19	29804	82.72	270.989	Protein import, sorting and homeostasis > Protein homeostasis > Chaperones	Carbamidomethylation; Deamidation (NQ)	Homo sapiens	Tmito	0.166236	0.395999	1.3967		14700000	10400000	19100000	8665090	13200000	12300000	14300000	22500000	20500000	27900000
410	Q99623	PHB2	Prohibitin-2	15	15	15	15	33296	55.18	255.714	Protein import, sorting and homeostasis > Protein homeostasis > Chaperones	Deamidation (NQ); Oxidation (M)	Homo sapiens	Tmito	0.183093	0.395999	1.36569		13800000	7743990	11800000	5003480	12000000	10600000	8667870	15300000	12200000	15800000
864	Q5JRX3	PITRM1	Presequence protease, mitochondrial	12	11	12	11	117413	14.46	200.625	Protein import, sorting and homeostasis > Protein homeostasis > Proteases	Carbamidomethylation	Homo sapiens	Tmito	0.489509	0.590554	1.3229		1150800	630529	1567080	229274	701891	951297	593815	1709410	1191720	883350
1205	Q9NRY6	PLSCR3	Phospholipid scramblase 3	6	6	6	6	31648	28.81	211.05	Metabolism > Lipid metabolism > Cardiolipin synthesis	Carbamidomethylation; Deamidation (NQ)	Homo sapiens	Tpossible_mito	0.665905	0.743983	1.15314		1352320	694310	3163240	1030920	923297	1445280	1083740	1782220	1952640	2503030
2379	O75439	PMPCB	Mitochondrial-processing peptidase subunit beta	2	2	1	1	54366	2.25	68.3781	Protein import, sorting and homeostasis > Protein import and sorting > Preprotein cleavage | Protein import, sorting and homeostasis > Protein homeostasis > Proteases	N/A	Homo sapiens	Tmito	0.250334	0.401451	15.0143		101038	0	50430.8	46059.5	53154.1	64034.5	58254.6	73361.4	46652.9	60696.1
2072	Q9NVS9	PNPO	Pyridoxine-5'-phosphate oxidase	3	3	3	3	29988	16.48	89.1173	Metabolism > Vitamin metabolism > Vitamin B6 metabolism	Carbamidomethylation	Homo sapiens	Tmito	0.569952	0.672185	1.28622		405013	387715	476986	68204.6	235582	656356	289863	474700	207862	373826
1564	Q9H2U2	PPA2	Inorganic pyrophosphatase 2, mitochondrial	5	4	4	3	37920	9.88	141.792	Mitochondrial central dogma > mtDNA maintenance | Mitochondrial central dogma > mtRNA metabolism | Mitochondrial central dogma > Translation | Metabolism > Nucleotide metabolism	N/A	Homo sapiens	Tmito	0.45542	0.559698	1.44385		652578	55148.3	384977	142474	210980	223867	229709	440280	390072	426440
592	P32119	PRDX2	Peroxiredoxin-2	14	13	13	12	21892	62.63	235.155	Metabolism > Detoxification > ROS and glutathione metabolism	Carbamidomethylation; Deamidation (NQ)	Homo sapiens	Tmito	0.958491	0.96215	0.983603		14800000	11300000	7226440	4322140	4273300	13100000	10800000	11800000	6010780	7972480
933	P30048	PRDX3	Thioredoxin-dependent peroxide reductase, mitochondrial	8	8	8	8	27693	41.02	212.239	Metabolism > Detoxification > ROS and glutathione metabolism	Carbamidomethylation; Deamidation (NQ); Oxidation (M)	Homo sapiens	Tmito	0.193596	0.395999	1.42988		8427790	2533320	6332050	3636200	6383470	5665170	4577880	8428060	9315540	7166800
505	Q13162	PRDX4	Peroxiredoxin-4	14	14	11	11	30540	57.56	266.001	Metabolism > Detoxification > ROS and glutathione metabolism	Carbamidomethylation; Deamidation (NQ)	Homo sapiens	Tmito	0.129463	0.395999	1.73133		13200000	3499810	15400000	4853680	10700000	8800070	12300000	18900000	14600000	17100000
891	P30044	PRDX5	Peroxiredoxin-5, mitochondrial	10	10	10	10	22086	56.07	218.586	Metabolism > Detoxification > ROS and glutathione metabolism	Carbamidomethylation; Deamidation (NQ); Oxidation (M)	Homo sapiens	Tmito	0.904641	0.917694	0.96067		22000000	14100000	6726440	14800000	22400000	17900000	6985120	8092170	9457650	19900000
407	P30041	PRDX6	Peroxiredoxin-6	20	20	20	20	25035	81.25	294.607	Metabolism > Lipid metabolism > Phospholipid metabolism | Metabolism > Detoxification > ROS and glutathione metabolism	Carbamidomethylation; Deamidation (NQ); Oxidation (M)	Homo sapiens	Tpossible_mito	0.621777	0.717225	1.16651		43600000	11100000	20700000	15400000	41400000	22400000	17900000	23300000	13900000	28400000
2222	P17612	PRKACA	cAMP-dependent protein kinase catalytic subunit alpha	2	1	1	1	40590	6.84	85.5592	Signaling > cAMP-PKA signaling	N/A	Homo sapiens	Tpossible_mito	0.125619	0.395999	0.00616048		73660.4	37757.8	50988.5	6998.57	28217.5	0	0	37515.7	51055.2	0
1562	Q9H7Z7	PTGES2	Prostaglandin E synthase 2	4	4	4	4	41943	17.24	109.098	Metabolism > Lipid metabolism > Eicosanoid metabolism	Deamidation (NQ)	Homo sapiens	Tmito	0.144168	0.395999	2.12999		282157	24444.4	219019	89759.4	162845	171442	207467	391521	242452	268161
2686	Q9Y3E5	PTRH2	Peptidyl-tRNA hydrolase 2, mitochondrial	1	1	1	1	19194	8.38	72.4178	0	N/A	Homo sapiens	Tmito	0.0973318	0.395999	1.72178		213199	90886.7	144808	48243.4	190119	170572	178408	132073	175049	306772
1541	P32322	PYCR1	Pyrroline-5-carboxylate reductase 1, mitochondrial	5	5	4	4	33361	17.87	150.893	Metabolism > Amino acid metabolism > Proline metabolism	Acetylation (Protein N-term)	Homo sapiens	Tmito	0.143742	0.395999	2.6845		975752	38775.2	337708	66402.8	449432	624974	408992	671549	443504	270330
783	P48047	ATP5PO	ATP synthase subunit O, mitochondrial	10	10	10	10	23277	57.75	209.611	OXPHOS > Complex V > CV subunits | OXPHOS > OXPHOS subunits	Carbamidomethylation; Deamidation (NQ)	Homo sapiens	Tmito	0.00886789	0.352911	1.79975	0.847797	6533930	3410120	6623610	3667520	8284090	6937720	10400000	9742800	10400000	7066100
2085	P99999	CYCS	Cytochrome c	3	3	3	3	11749	31.43	111.011	Metabolism > Metals and cofactors > Heme-containing proteins | Metabolism > Electron carriers > Cytochromes | OXPHOS > OXPHOS subunits | OXPHOS > Cytochrome C | Mitochondrial dynamics and surveillance > Apoptosis	N/A	Homo sapiens	Tmito	0.0426465	0.38343	1.67237	0.741891	366538	207459	437412	153610	393268	489739	334869	487136	554044	458995
2458	Q9HBH5	RDH14	Retinol dehydrogenase 14	1	1	1	1	36865	3.87	42.5175	Metabolism > Vitamin metabolism > Vitamin A metabolism	N/A	Homo sapiens	Tpossible_mito	0.432624	0.554263	11.7785		0	0	3384.47	0	0	5981.33	0	0	8683.51	10122.6
1345	Q9Y3B8	REXO2	Oligoribonuclease, mitochondrial	5	4	5	4	26833	24.05	153.833	Mitochondrial central dogma > mtRNA metabolism > mtRNA stability and decay	Carbamidomethylation; Deamidation (NQ)	Homo sapiens	Tmito	0.0624361	0.38343	1.71497		1443030	628251	1498960	836159	1232540	1420150	1325190	3088880	2331780	1844410
2446	P52758	RIDA	2-iminobutanoate/2-iminopropanoate deaminase	2	2	2	2	14494	18.98	74.3351	0	N/A	Homo sapiens	Tmito	0.327846	0.472929	1.4918		56989.5	34466.2	147967	29696.9	46914.4	154204	42413.9	85738.2	103344	102799
1374	Q96DB5	RMDN1	Regulator of microtubule dynamics protein 1	5	5	5	5	35808	19.11	128.423	0	N/A	Homo sapiens	Tmito	0.147527	0.395999	44.264		191269	46169.4	293017	0	195750	323820	252967	418313	430989	342452
1417	Q9Y512	SAMM50	Sorting and assembly machinery component 50 homolog	6	5	6	5	51976	11.94	119.51	Protein import, sorting and homeostasis > Protein import and sorting > SAM | Mitochondrial dynamics and surveillance > Intramitochondrial membrane interactions	Carbamidomethylation	Homo sapiens	Tmito	0.266183	0.413231	1.25283		759785	599331	466372	434963	561549	800837	485155	638271	658304	1184200
1116	P22307	SCP2	Sterol carrier protein 2	8	8	8	8	58994	13.35	147.764	Metabolism > Lipid metabolism > Cholesterol, bile acid, steroid synthesis	Carbamidomethylation; Deamidation (NQ); Oxidation (M)	Homo sapiens	Tpossible_mito	0.209949	0.395999	2.09968		436859	268974	2743850	237624	464495	1028290	695391	1243680	2393820	1837560
1348	P31040	SDHA	Succinate dehydrogenase [ubiquinone] flavoprotein subunit, mitochondrial	6	6	6	6	72692	13.4	164.914	OXPHOS > Complex II > CII subunits | Metabolism > Carbohydrate metabolism > TCA cycle | OXPHOS > OXPHOS subunits	Carbamidomethylation; Deamidation (NQ)	Homo sapiens	Tmito	0.143558	0.395999	2.07143		1329860	238089	387118	113126	854782	1138920	401216	839523	684934	574305
1968	P21912	SDHB	Succinate dehydrogenase [ubiquinone] iron-sulfur subunit, mitochondrial	3	3	3	3	31630	11.79	117.863	OXPHOS > Complex II > CII subunits | Metabolism > Carbohydrate metabolism > TCA cycle | Metabolism > Metals and cofactors > Fe-S-containing proteins | OXPHOS > OXPHOS subunits	N/A	Homo sapiens	Tmito	0.157686	0.395999	2.40279		767267	104250	828085	66192.9	564250	700250	287090	895591	850855	646322
987	Q9H9B4	SFXN1	Sideroflexin-1	7	7	5	5	35619	19.57	143.515	Metabolism > Amino acid metabolism > Serine metabolism | Metabolism > Vitamin metabolism > Folate and 1-C metabolism | Small molecule transport > Sideroflexins	N/A	Homo sapiens	Tmito	0.0703303	0.38343	1.69616		2802820	2316640	1114230	1328860	2799750	4438790	2966300	3807060	3246260	1558070
935	Q9BWM7	SFXN3	Sideroflexin-3	10	9	8	8	35503	35.51	190.321	Metabolism > Amino acid metabolism > Serine metabolism | Metabolism > Vitamin metabolism > Folate and 1-C metabolism | Small molecule transport > Sideroflexins	N/A	Homo sapiens	Tpossible_mito	0.149262	0.395999	1.97125		2528670	248032	723394	634975	1421630	913127	2761960	1708070	1081330	1370080
436	P34897	SHMT2	Serine hydroxymethyltransferase, mitochondrial	18	18	18	18	55993	46.23	261.624	Metabolism > Amino acid metabolism > Serine metabolism | Metabolism > Amino acid metabolism > Glycine metabolism | Metabolism > Vitamin metabolism > Folate and 1-C metabolism	Carbamidomethylation; Deamidation (NQ); Oxidation (M)	Homo sapiens	Tmito	0.0821179	0.391547	1.78513		8109950	1588230	4710060	2392700	6334940	7266740	5630410	6837600	5308440	6015830
1791	P53007	SLC25A1	Tricarboxylate transport protein, mitochondrial	4	4	4	4	34013	14.79	110.16	Metabolism > Carbohydrate metabolism > Gluconeogenesis | Metabolism > Carbohydrate metabolism > TCA-associated | Metabolism > Lipid metabolism | Small molecule transport > SLC25A family	Carbamidomethylation	Homo sapiens	Tmito	0.170372	0.395999	1.9466		1668840	172381	336676	151884	820866	580966	701570	586176	624439	792657
1265	Q02978	SLC25A11	Mitochondrial 2-oxoglutarate/malate carrier protein	7	7	7	7	34062	25.8	153.79	Metabolism > Carbohydrate metabolism > Gluconeogenesis | Metabolism > Carbohydrate metabolism > Malate-aspartate shuttle | Metabolism > Carbohydrate metabolism > TCA-associated | Small molecule transport > SLC25A family	Acetylation (Protein N-term)	Homo sapiens	Tmito	0.100842	0.395999	3.04109		1321740	46714.8	245347	118111	931396	584434	282609	744463	621760	840725
2091	O75746	SLC25A12	Electrogenic aspartate/glutamate antiporter SLC25A12, mitochondrial	3	3	1	1	74762	2.21	88.34	Metabolism > Carbohydrate metabolism > Malate-aspartate shuttle | Metabolism > Amino acid metabolism > Glutamate metabolism | Signaling > Calcium homeostasis > EF hand proteins | Small molecule transport > SLC25A family	N/A	Homo sapiens	Tmito	0.786139	0.820455	2.58062		22794.4	0	0	0	0	0	0	0	21977.5	46249.9
3077	Q9H936	SLC25A22	Mitochondrial glutamate carrier 1	1	1	1	1	34470	4.64	59.9365	Small molecule transport > SLC25A family	Carbamidomethylation	Homo sapiens	Tmito	0.241504	0.401451	0.0766031		29041.2	0	0	0	0	0	0	0	0	0
3099	Q9BV35	SLC25A23	Calcium-binding mitochondrial carrier protein SCaMC-3	1	1	1	1	52378	2.35	47.9262	Metabolism > Nucleotide metabolism > Nucleotide import | Signaling > Calcium homeostasis > EF hand proteins | Small molecule transport > SLC25A family	Deamidation (NQ)	Homo sapiens	Tmito	0.907226	0.917694	1.15044		12154.8	288764	903304	7339810	460240	94597.7	550806	267512	842228	1523180
791	P30084	ECHS1	Enoyl-CoA hydratase, mitochondrial	10	10	10	10	31387	41.38	215.533	Metabolism > Lipid metabolism > Fatty acid oxidation | Metabolism > Amino acid metabolism > Branched-chain amino acid metabolism | Metabolism > Amino acid metabolism > Lysine metabolism	Carbamidomethylation; Deamidation (NQ)	Homo sapiens	Tmito	0.00602932	0.352911	1.52354	0.607428	5142210	4196330	5355700	3122110	6618810	5781240	6592680	6758990	8133900	6180280
1099	Q00325	SLC25A3	Phosphate carrier protein, mitochondrial	9	9	9	9	40095	19.61	169.305	Metabolism > Metals and cofactors > Copper metabolism | Signaling > Calcium homeostasis > Calcium cycle | Small molecule transport > SLC25A family	Oxidation (M)	Homo sapiens	Tmito	0.147553	0.395999	1.79675		11400000	1583960	5132490	2305550	6736350	7842920	4549040	7946500	6542800	8409910
701	P12235	SLC25A4	ADP/ATP translocase 1	12	12	1	1	33064	3.02	240.075	Metabolism > Nucleotide metabolism > Nucleotide import | Signaling > Calcium homeostasis > Mitochondrial permeability transition pore | Small molecule transport > SLC25A family	N/A	Homo sapiens	Tmito	0.0572865	0.38343	244.765		54186.4	0	47388	0	37142.2	44184.6	49009.9	103207	56690.1	59456.5
637	P05141	SLC25A5	ADP/ATP translocase 2	15	15	5	5	32852	19.13	219.583	Metabolism > Nucleotide metabolism > Nucleotide import | Signaling > Calcium homeostasis > Mitochondrial permeability transition pore | Small molecule transport > SLC25A family	Acetylation (Protein N-term); Carbamidomethylation; Oxidation (M)	Homo sapiens	Tmito	0.452634	0.559698	1.39235		5901300	844228	1809240	1027380	3817560	2459210	1087350	3184270	1901460	3322010
512	P12236	SLC25A6	ADP/ATP translocase 3	16	14	3	3	32866	9.4	265.36	Metabolism > Nucleotide metabolism > Nucleotide import | Signaling > Calcium homeostasis > Mitochondrial permeability transition pore | Small molecule transport > SLC25A family	Acetylation (Protein N-term)	Homo sapiens	Tmito	0.137965	0.395999	1.94507		5560180	738410	1815900	712406	3481110	3668900	2012020	3467550	2293250	3243870
209	Q7KZF4	SND1	Staphylococcal nuclease domain-containing protein 1	30	30	30	30	101997	40.99	296.152	0	Acetylation (Protein N-term); Carbamidomethylation; Deamidation (NQ); Oxidation (M)	Homo sapiens	Tmito	0.637025	0.728424	1.17128		12900000	1863950	5153930	4987310	4699620	7506490	5891560	5999510	5267420	6040520
1118	P00441	SOD1	Superoxide dismutase [Cu-Zn]	7	7	7	7	15936	73.38	163.904	Metabolism > Detoxification > ROS and glutathione metabolism	Carbamidomethylation; Deamidation (NQ)	Homo sapiens	Tmito	0.17809	0.395999	1.61163		1149610	332676	1415710	918784	771043	1636510	1165690	1226950	1353490	2516940
660	P04179	SOD2	Superoxide dismutase [Mn], mitochondrial	11	10	11	10	24750	50.9	231.015	Metabolism > Detoxification > ROS and glutathione metabolism	Deamidation (NQ)	Homo sapiens	Tmito	0.173364	0.395999	2.1763		2079650	2702130	6620280	2031800	2779780	4559050	1910600	16900000	11300000	15100000
2424	P35270	SPR	Sepiapterin reductase	2	2	2	2	28048	13.03	131.856	Metabolism > Metals and cofactors > Tetrahydrobiopterin synthesis	N/A	Homo sapiens	Tpossible_mito	0.371124	0.497988	1.57149		139568	34912.3	268466	33313.6	113596	103065	59331.4	156534	234734	169763
893	Q9Y6N5	SQOR	Sulfide:quinone oxidoreductase, mitochondrial	11	11	11	11	49961	32.22	184.929	Metabolism > Electron carriers > Q-linked reactions, other | Metabolism > Sulfur metabolism	Carbamidomethylation	Homo sapiens	Tmito	0.142749	0.395999	2.3805		2434460	488086	1732390	623007	1876830	682994	5806580	1586200	6250630	3581200
1478	Q04837	SSBP1	Single-stranded DNA-binding protein, mitochondrial	5	5	5	5	17260	43.24	171.532	Mitochondrial central dogma > mtDNA maintenance > mtDNA replication | Mitochondrial central dogma > mtDNA maintenance > mtDNA nucleoid	N/A	Homo sapiens	Tmito	0.183727	0.395999	1.43734		1022660	459830	1381370	1188980	883694	995238	1598250	1982650	1570840	1367200
781	Q9UJZ1	STOML2	Stomatin-like protein 2, mitochondrial	13	13	13	13	38534	51.97	237.599	Protein import, sorting and homeostasis > Protein homeostasis	Carbamidomethylation	Homo sapiens	Tmito	0.142763	0.395999	1.84463		3364200	795906	3816750	951230	2677960	2026710	2526850	3988420	3883480	5621380
1836	Q9P2R7	SUCLA2	Succinate--CoA ligase [ADP-forming] subunit beta, mitochondrial	4	4	4	4	50317	8.64	88.1774	Metabolism > Carbohydrate metabolism > TCA cycle | Metabolism > Carbohydrate metabolism > Itaconate metabolism | Metabolism > Nucleotide metabolism > Nucleotide synthesis and processing	N/A	Homo sapiens	Tmito	0.18322	0.395999	33.2098		542103	0	125288	56770.7	337919	173708	126467	364828	341267	347521
1734	P53597	SUCLG1	Succinate--CoA ligase [ADP/GDP-forming] subunit alpha, mitochondrial	3	3	3	3	36250	11.56	134.369	Metabolism > Carbohydrate metabolism > TCA cycle | Metabolism > Carbohydrate metabolism > Itaconate metabolism | Metabolism > Nucleotide metabolism > Nucleotide synthesis and processing	Carbamidomethylation; Deamidation (NQ)	Homo sapiens	Tpossible_mito	0.139613	0.395999	1.65299		1154770	277358	1114710	449091	1046640	961891	666071	1137050	1259570	1363750
1139	Q96I99	SUCLG2	Succinate--CoA ligase [GDP-forming] subunit beta, mitochondrial	8	8	8	8	46511	21.99	145.927	Metabolism > Carbohydrate metabolism > TCA cycle | Metabolism > Carbohydrate metabolism > Itaconate metabolism | Metabolism > Nucleotide metabolism > Nucleotide synthesis and processing	N/A	Homo sapiens	Tmito	0.215762	0.395999	1.25847		1514480	576027	1063160	841765	1247010	1358060	1014140	1310740	1076490	1130810
1555	O43615	TIMM44	Mitochondrial import inner membrane translocase subunit TIM44	5	5	5	5	51356	11.95	124.604	Protein import, sorting and homeostasis > Protein import and sorting > Import motor	N/A	Homo sapiens	Tmito	0.115366	0.395999	2.07118		476226	67540.6	125516	52883.8	263463	249335	153455	349518	261212	267581
2608	Q3ZCQ8	TIMM50	Mitochondrial import inner membrane translocase subunit TIM50	1	1	1	1	39646	2.83	43.7814	Protein import, sorting and homeostasis > Protein import and sorting > TIM23 presequence pathway	N/A	Homo sapiens	Tmito	0.137409	0.395999	28.2276		41548.7	7582.5	45209.5	0	43547.1	45939.9	65935.8	62290.3	61660	53671.8
2672	Q9H061	TMEM126A	Transmembrane protein 126A	1	1	1	1	21527	13.85	57.0215	OXPHOS > Complex I > CI assembly factors | OXPHOS > OXPHOS assembly factors	N/A	Homo sapiens	Tmito	0.0668202	0.38343	305.017		9203.23	0	0	0	0	10630.7	10445.5	16516.4	16676.5	23245.6
138	P38646	HSPA9	Stress-70 protein, mitochondrial	35	35	35	35	73680	53.9	317.859	Metabolism > Metals and cofactors > Fe-S cluster biosynthesis	Carbamidomethylation; Deamidation (NQ); Oxidation (M)	Homo sapiens	Tmito	0.0271767	0.38343	1.41618	0.502009	49600000	25500000	26500000	30800000	48700000	38300000	48500000	46500000	44800000	44900000
2071	Q9NS69	TOMM22	Mitochondrial import receptor subunit TOM22 homolog	2	2	2	2	15522	32.39	107.998	Protein import, sorting and homeostasis > Protein import and sorting > TOM	Acetylation (Protein N-term); Deamidation (NQ)	Homo sapiens	Tmito	0.208071	0.395999	7.42348		48339.2	11215.2	7029560	9575400	10400000	6870200	708945	5507910	1134180	3686790
2646	Q15785	TOMM34	Mitochondrial import receptor subunit TOM34	1	1	1	1	34559	4.85	54.8797	Protein import, sorting and homeostasis > Protein import and sorting > TOM	N/A	Homo sapiens	Tmito	0.616439	0.717225	0.150434		48322.2	0	35693.6	0	0	0	31984.1	25956.4	0	0
1665	O43847	NRDC	Nardilysin	4	4	4	4	131701	3.65	95.6622	Protein import, sorting and homeostasis > Protein homeostasis > Chaperones | Protein import, sorting and homeostasis > Protein import and sorting	Carbamidomethylation	Homo sapiens	Tpossible_mito	0.0455132	0.38343	0.594493	-0.750267	565058	306289	271372	309772	139218	216568	143181	293347	193483	316177
1492	O94826	TOMM70	Mitochondrial import receptor subunit TOM70	5	5	5	5	67455	9.54	154.765	Protein import, sorting and homeostasis > Protein import and sorting > TOM	Carbamidomethylation; Deamidation (NQ)	Homo sapiens	Tmito	0.0694582	0.38343	2.20017		711140	123618	519251	253257	325170	863443	966328	929522	902851	619225
1602	Q12931	TRAP1	Heat shock protein 75 kDa, mitochondrial	4	4	3	3	80110	4.97	133.879	Protein import, sorting and homeostasis > Protein homeostasis > Chaperones	N/A	Homo sapiens	Tmito	0.106409	0.395999	3.60089		211989	38978.1	80199.3	3885.36	112237	171175	120866	270518	85061.9	168559
2879	P43897	TSFM	Elongation factor Ts, mitochondrial	1	1	1	1	35391	5.23	49.788	Mitochondrial central dogma > Translation > Translation factors	N/A	Homo sapiens	Tmito	0.593177	0.696453	9.13144		52247.1	0	80777.7	0	78192.1	108851	0	144451	0	129286
1952	P30536	TSPO	Translocator protein	2	2	2	2	18828	18.34	103.876	Metabolism > Lipid metabolism > Cholesterol, bile acid, steroid synthesis	Carbamidomethylation; Oxidation (M)	Homo sapiens	Tmito	0.0462534	0.38343	0.563317	-0.82798	12200000	5938760	12900000	11900000	7446890	3682250	3485200	8590870	6372200	7164140
511	P49411	TUFM	Elongation factor Tu, mitochondrial	19	19	19	19	49875	50.11	243.282	Mitochondrial central dogma > Translation > Translation factors	Carbamidomethylation; Oxidation (M)	Homo sapiens	Tmito	0.223367	0.396929	1.36548		17800000	7073850	6519520	5912070	11000000	17900000	11400000	9936670	8852020	11100000
252	Q16881	TXNRD1	Thioredoxin reductase 1, cytoplasmic	21	21	21	21	70875	44.53	303.939	Metabolism > Detoxification > ROS and glutathione metabolism | Metabolism > Detoxification > Selenoproteins	Carbamidomethylation; Deamidation (NQ); Oxidation (M)	Homo sapiens	Tmito	0.449296	0.559698	1.28469		17000000	3085460	8038500	5718710	8621850	10900000	8490500	13900000	6300750	7616930
2198	Q9UDW1	UQCR10	Cytochrome b-c1 complex subunit 9	1	1	1	1	7308	26.98	47.966	OXPHOS > Complex III > CIII subunits | OXPHOS > OXPHOS subunits	N/A	Homo sapiens	Tmito	0.0859217	0.395999	188.637		69179.6	0	190839	0	26631.7	46854.6	84150.3	83712	91199.9	85260.7
2749	P14927	UQCRB	Cytochrome b-c1 complex subunit 7	1	1	1	1	13530	11.71	66.1043	OXPHOS > Complex III > CIII subunits | OXPHOS > OXPHOS subunits	N/A	Homo sapiens	Tmito	0.066665	0.38343	260.445		70159	0	115189	0	60003.9	44124.5	39574.7	96062.1	152470	147750
458	P31930	UQCRC1	Cytochrome b-c1 complex subunit 1, mitochondrial	15	15	14	14	52646	46.04	284.545	Protein import, sorting and homeostasis > Protein import and sorting > Preprotein cleavage | OXPHOS > Complex III > CIII subunits | OXPHOS > OXPHOS subunits	Carbamidomethylation; Deamidation (NQ); Oxidation (M)	Homo sapiens	Tmito	0.111633	0.395999	2.06465		6590630	2659700	7226000	1086070	9438030	5248850	3621310	9382180	9264110	8015620
451	P22695	UQCRC2	Cytochrome b-c1 complex subunit 2, mitochondrial	13	13	13	13	48443	47.02	244.885	Protein import, sorting and homeostasis > Protein import and sorting > Preprotein cleavage | OXPHOS > Complex III > CIII subunits | OXPHOS > OXPHOS subunits	Carbamidomethylation; Deamidation (NQ)	Homo sapiens	Tmito	0.493162	0.592244	1.30752		9373140	4742940	12300000	1748880	6637830	5204400	5494120	9036590	7977380	10800000
1286	P47985	UQCRFS1	Cytochrome b-c1 complex subunit Rieske, mitochondrial	6	6	2	2	29668	8.03	150.79	OXPHOS > Complex III > CIII subunits | Metabolism > Metals and cofactors > Fe-S-containing proteins | OXPHOS > OXPHOS subunits	N/A	Homo sapiens	Tmito	0.217241	0.395999	28.28		500382	117156	366651	0	439694	310470	199528	399463	305770	484518
2376	O14949	UQCRQ	Cytochrome b-c1 complex subunit 8	2	2	2	2	9906	29.27	87.0574	OXPHOS > Complex III > CIII subunits | OXPHOS > OXPHOS subunits	N/A	Homo sapiens	Tmito	0.187537	0.395999	2.22201		132643	60387.1	142033	9563.17	115144	114407	55360	146598	191199	211298
316	P21796	VDAC1	Voltage-dependent anion-selective channel protein 1	23	22	22	22	30773	87.63	311.156	Signaling > Calcium homeostasis > Mitochondrial permeability transition pore | Mitochondrial dynamics and surveillance > Organelle contact sites | Small molecule transport	Acetylation (Protein N-term); Carbamidomethylation; Oxidation (M)	Homo sapiens	Tmito	0.168311	0.395999	1.60654		35800000	10900000	35200000	10500000	27800000	25700000	20800000	45200000	33700000	41600000
625	P45880	VDAC2	Voltage-dependent anion-selective channel protein 2	14	14	14	14	31566	56.46	241.416	Small molecule transport	Carbamidomethylation	Homo sapiens	Tmito	0.231982	0.398767	1.45018		26800000	7722890	20100000	7730820	18500000	17800000	12400000	24800000	21800000	24300000
1299	Q9Y277	VDAC3	Voltage-dependent anion-selective channel protein 3	7	7	6	6	30659	23.32	159.317	Signaling > Calcium homeostasis > Mitochondrial permeability transition pore | Small molecule transport	Acetylation (Protein N-term); Carbamidomethylation	Homo sapiens	Tmito	0.199426	0.395999	1.68915		3465150	659332	1330750	543368	2548120	1678180	1053560	2492740	1800300	2439460
