# Supplementary material for: Large extracellular vesicles containing mitochondria (EVMs) derived from Alzheimer’s disease cells harbor pathologic functional and molecular profiles and spread mitochondrial dysfunctions
Source: Research Square preprint supplement (doi:10.21203/rs.3.rs-5932075/v1), 2025-02-13
Supplement: Supplementary file 6 [file c490d09572fc3d3c24fff150.xlsx]

## Sheet: pValue <0,05
																			Ctrl	Ctrl	Ctrl	Ctrl	AD	AD	AD	AD
Protein Group	Accession	Gene	Description	#Peptides DB	#Peptides LFQ	#Unique DB	#Unique LFQ	Avg. Mass	Coverage (%)	-10LgP	MitoPathway	PTM	Taxonomia	Training Data set	p-value	q-value	Fold change	Log2(FC)	CTRL-021 Area	CTRL-69 Area	CTRL-76 Area	CTRL-92 Area	AD-117 Area	AD-119 Area	AD-88 Area	AD-99 Area
1675	P21926	CD9	CD9 antigen	2	2	2	2	25416	15.35	110.046	N/A	Carbamidomethylation; Deamidation (NQ)	Homo sapiens	N/A	8.29024e-07	0.00112562	224881	17.7788	0	0	0	0	255570	1131150	74349.1	118989
1493	P14384	CPM	Carboxypeptidase M	6	5	6	5	50514	16.48	149.811	N/A	Carbamidomethylation	Homo sapiens	N/A	3.49404e-05	0.0190355	132756	17.0184	0	0	0	0	330711	262308	653382	5480.16
996	P55795	HNRNPH2	Heterogeneous nuclear ribonucleoprotein H2	8	7	2	1	49264	2	170.97	N/A	N/A	Homo sapiens	N/A	2.68432e-08	7.31208e-05	71521.4	16.1261	0	0	0	0	48169.7	39680.5	91678.7	149323
2199	P53708	ITGA8	Integrin alpha-8	2	2	2	2	117474	2.45	64.4147	N/A	N/A	Homo sapiens	N/A	6.09062e-06	0.00414771	39931	15.2852	0	0	0	0	163191	11039.8	116066	12158.4
1747	P08493	MGP	Matrix Gla protein	2	2	2	2	12353	23.3	106.221	N/A	Deamidation (NQ); Oxidation (M)	Homo sapiens	N/A	0.0260233	1	27631.3	14.754	0	0	0	0	234310	0	5974570	416397
2680	Q8WWB7	GLMP	Glycosylated lysosomal membrane protein	1	1	1	1	43864	6.4	52.1898	N/A	Carbamidomethylation	Homo sapiens	N/A	0.0201236	1	4203.02	12.0372	0	0	40040.3	0	34748.3	88232.9	48177.2	84593.5
1304	Q71DI3	H3C13	Histone H3.2	5	5	1	1	15388	23.53	137.261	N/A	Carbamidomethylation; Deamidation (NQ); Oxidation (M)	Homo sapiens	N/A	0.0240566	1	3773.03	11.8815	0	0	52177.1	0	146796	35961.1	23679.4	84590.4
2952	O95379	TNFAIP8	Tumor necrosis factor alpha-induced protein 8	1	1	1	1	23003	10.1	61.5729	N/A	N/A	Homo sapiens	N/A	0.0254602	1	2293.82	11.1635	0	0	0	0	0	67418	8502.84	48294.2
1799	P23141	CES1	Liver carboxylesterase 1	4	3	4	3	62521	8.47	112.171	N/A	N/A	Homo sapiens	N/A	0.0412362	1	1906.54	10.8967	9438.08	45190.6	0	0	650526	101606	458117	186105
1120	Q9UIJ7	AK3	GTP:AMP phosphotransferase AK3, mitochondrial	7	7	7	7	25565	37.89	153.833	Metabolism > Nucleotide metabolism > Nucleotide synthesis and processing	Deamidation (NQ)	Homo sapiens	Tmito	0.0373782	1	17.6793	4.14399	976194	451915	1378070	1951860	30300000	52300000	82500000	886705
1587	Q08188	TGM3	Protein-glutamine gamma-glutamyltransferase E	5	5	5	5	76632	10.68	170.941	N/A	Carbamidomethylation	Homo sapiens	N/A	0.0196447	1	2.97567	1.57321	555509	311943	650706	192203	716935	1925780	1062350	1158500
2581	F8WCM5	INS-IGF2	Insulin, isoform 2	1	1	1	1	21537	3.5	43.5626	N/A	N/A	Homo sapiens	N/A	0.0243226	1	2.49113	1.3168	2311760	3943470	2427610	6067230	9997980	4648780	11500000	9674410
2253	Q9UBW5	BIN2	Bridging integrator 2	2	2	2	2	61874	4.42	80.7318	N/A	Carbamidomethylation	Homo sapiens	N/A	0.0162859	1	2.45629	1.29648	30934.3	88905	28801.4	44302.4	95437.6	118712	127238	88612.9
1391	P62847	RPS24	40S ribosomal protein S24	4	4	4	4	15423	29.32	135.813	N/A	Oxidation (M)	Homo sapiens	N/A	0.0396677	1	2.18862	1.13002	645832	314803	613435	846324	1346210	1339570	695164	1931860
1909	Q9Y3U8	RPL36	60S ribosomal protein L36	2	2	2	2	12254	20	74.1876	N/A	Carbamidomethylation; Oxidation (M)	Homo sapiens	N/A	0.049482	1	2.06853	1.0486	586736	214489	658475	334093	730166	1198180	629133	920908
33	P02461	COL3A1	Collagen alpha-1(III) chain	71	70	69	68	138564	57.71	434.795	N/A	Carbamidomethylation; Deamidation (NQ); Oxidation (M)	Homo sapiens	N/A	0.0339189	1	1.62396	0.699515	86500000	104000000	89600000	86600000	113000000	245000000	137000000	128000000
1183	Q92692	NECTIN2	Nectin-2	8	7	8	7	57742	15.06	176.206	N/A	Carbamidomethylation	Homo sapiens	N/A	0.0386831	1	1.57016	0.65091	5454330	3760090	2647190	4905370	6189570	7509070	5941090	5862160
1839	P31146	CORO1A	Coronin-1A	3	3	3	3	51026	11.28	101.186	N/A	Carbamidomethylation; Deamidation (NQ)	Homo sapiens	N/A	0.0359694	1	0.782399	-0.354024	565211	426928	410238	422965	325382	380161	321895	394042
1470	P55083	MFAP4	Microfibril-associated glycoprotein 4	5	4	5	4	28648	15.29	150.179	N/A	Carbamidomethylation; Deamidation (NQ)	Homo sapiens	N/A	0.0454581	1	0.781393	-0.35588	1756120	2493770	2216570	1953610	1684690	1425260	1547440	1902730
1035	P01008	SERPINC1	Antithrombin-III	10	10	10	10	52602	11.85	174.588	N/A	N/A	Homo sapiens	N/A	0.00500661	1	0.746143	-0.422475	27700000	27300000	32300000	32500000	24700000	23400000	21500000	19800000
1105	Q9HBI1	PARVB	Beta-parvin	8	8	6	6	41714	21.98	192.6	N/A	Deamidation (NQ)	Homo sapiens	N/A	0.0348339	1	0.71923	-0.475476	1185380	1417310	1435910	878277	783024	848142	937018	911085
792	P62917	RPL8	60S ribosomal protein L8	8	7	8	7	28025	29.18	178.016	N/A	Carbamidomethylation; Deamidation (NQ)	Homo sapiens	N/A	0.0221295	1	0.711763	-0.490532	6445250	7486090	7727570	6809750	3992880	4770960	6544020	5227250
2075	P51159	RAB27A	Ras-related protein Rab-27A	3	3	1	1	24868	4.98	83.6207	N/A	N/A	Homo sapiens	N/A	0.0285438	1	0.675973	-0.564963	294890	260516	234756	196704	143701	183652	210618	133258
181	P07093	SERPINE2	Glia-derived nexin	26	26	26	26	44002	67.34	295.36	N/A	Carbamidomethylation; Deamidation (NQ); Oxidation (M)	Homo sapiens	N/A	0.0184913	1	0.560976	-0.833989	27500000	51500000	52100000	32000000	18100000	25700000	23600000	21300000
118	P17655	CAPN2	Calpain-2 catalytic subunit	39	37	39	37	79995	63.86	373.542	N/A	Carbamidomethylation; Deamidation (NQ); Oxidation (M)	Homo sapiens	N/A	0.035524	1	0.560569	-0.835037	46300000	35500000	33400000	29600000	33800000	21100000	14900000	15100000
1609	Q15493	RGN	Regucalcin	4	4	4	4	33253	15.72	140.756	N/A	Carbamidomethylation; Deamidation (NQ); Oxidation (M)	Homo sapiens	N/A	0.00649492	1	0.552231	-0.856656	1280330	790039	830197	868543	631166	567857	440457	429674
1133	P78539	SRPX	Sushi repeat-containing protein SRPX	8	8	8	8	51572	19.83	170.397	N/A	Oxidation (M)	Homo sapiens	N/A	0.0472094	1	0.543105	-0.880696	1842370	2548090	1580390	2069530	736676	1151390	1967770	800370
418	P27708	CAD	CAD protein	21	20	21	20	242984	12.99	234.331	N/A	Acetylation (Protein N-term); Carbamidomethylation; Deamidation (NQ)	Homo sapiens	N/A	0.0353366	1	0.524048	-0.93223	5113860	3757260	2028830	2133720	1475930	1909860	1310690	1697920
1838	Q9C0C9	UBE2O	(E3-independent) E2 ubiquitin-conjugating enzyme	4	4	4	4	141293	3.56	127.188	N/A	N/A	Homo sapiens	N/A	0.04295	1	0.495006	-1.01448	1189500	883283	473075	462210	423302	303397	242395	443090
1965	Q00266	MAT1A	S-adenosylmethionine synthase isoform type-1	2	2	1	1	43648	3.8	98.1726	N/A	Carbamidomethylation; Deamidation (NQ)	Homo sapiens	N/A	0.0121998	1	0.487017	-1.03796	83066.6	114846	115134	68948.9	49184.9	58359.7	51985.3	28551.2
1418	Q9Y6B6	SAR1B	GTP-binding protein SAR1b	5	5	2	2	22410	15.66	142.083	N/A	Carbamidomethylation; Deamidation (NQ)	Homo sapiens	N/A	0.00091221	0.414143	0.482445	-1.05156	1034270	1410670	1489260	1410420	693319	705726	492110	689505
2360	O43556	SGCE	Epsilon-sarcoglycan	2	2	2	2	49851	6.64	82.7615	N/A	N/A	Homo sapiens	N/A	0.0264306	1	0.480606	-1.05707	306109	182678	304425	126791	105476	90198.1	147845	81871.1
657	P00966	ASS1	Argininosuccinate synthase	14	14	14	14	46530	43.45	209.171	N/A	Carbamidomethylation; Deamidation (NQ)	Homo sapiens	N/A	0.0311745	1	0.42908	-1.22068	5839940	3964580	3632290	3048190	833106	2208060	1620710	2914490
829	P25788	PSMA3	Proteasome subunit alpha type-3	10	10	10	10	28433	39.61	188.217	N/A	Acetylation (Protein N-term); Carbamidomethylation; Deamidation (NQ); Oxidation (M)	Homo sapiens	N/A	0.0496424	1	0.402219	-1.31395	4569810	10300000	17300000	14500000	8007990	3870660	3520100	2832260
818	O15427	SLC16A3	Monocarboxylate transporter 4	10	10	10	10	49469	22.15	211.234	N/A	Carbamidomethylation; Deamidation (NQ); Oxidation (M)	Homo sapiens	N/A	0.0220778	1	0.400895	-1.3187	29400000	31500000	18700000	22300000	5095710	18600000	8770520	12000000
1891	Q5T447	HECTD3	E3 ubiquitin-protein ligase HECTD3	3	3	3	3	97113	4.88	99.8371	N/A	N/A	Homo sapiens	N/A	0.0445926	1	0.356561	-1.48778	126548	318501	145150	78560	80905.3	89881.1	34299.6	29784.2
1379	P01031	C5	Complement C5	6	6	6	6	188305	3.4	143.332	N/A	Carbamidomethylation; Deamidation (NQ)	Homo sapiens	N/A	0.0353152	1	0.351171	-1.50975	8252800	2209790	6595160	5158120	939346	1849880	3308250	1641260
2149	Q92619	ARHGAP45	Rho GTPase-activating protein 45	2	2	2	2	124614	1.94	60.8088	N/A	N/A	Homo sapiens	N/A	0.0162643	1	0.330461	-1.59745	111993	196856	144560	68527.1	80551.5	25419.8	39954	31836.6
1023	P21291	CSRP1	Cysteine and glycine-rich protein 1	7	7	7	7	20567	59.59	188.67	N/A	Carbamidomethylation; Deamidation (NQ)	Homo sapiens	N/A	0.0330459	1	0.323748	-1.62706	4532980	10300000	14600000	3459720	1950050	2387140	4092160	1360080
861	P24593	IGFBP5	Insulin-like growth factor-binding protein 5	11	11	11	11	30570	46.69	189.144	N/A	Carbamidomethylation; Oxidation (M)	Homo sapiens	N/A	0.0120616	1	0.231245	-2.11251	1846090	9015620	5770780	2902170	693169	1528870	1194290	629762
1255	Q93050	ATP6V0A1	V-type proton ATPase 116 kDa subunit a 1	7	7	7	7	96413	12.43	158.82	N/A	Carbamidomethylation	Homo sapiens	N/A	0.00581676	1	0.0844011	-3.5666	1075890	8523560	8418410	7112620	172248	735758	532504	412884
2748	P08240	SRPRA	Signal recognition particle receptor subunit alpha	1	1	1	1	69811	2.19	46.4457	N/A	N/A	Homo sapiens	N/A	0.0273285	1	0.000629118	-10.6344	116497	7933.51	0	6907	0	0	0	0
2685	O75366	AVIL	Advillin	1	1	1	1	92027	1.1	52.7753	N/A	Oxidation (M)	Homo sapiens	N/A	0.0427532	1	0.000378928	-11.3658	1063530	671327	971807	81535.3	0	40467.9	0	28822.3
3045	Q8TB61	SLC35B2	Adenosine 3'-phospho 5'-phosphosulfate transporter 1	1	1	1	1	47515	2.31	47.68	N/A	N/A	Homo sapiens	N/A	0.0263422	1	0.000335487	-11.5415	101659	8011.42	96927.4	0	0	0	0	0
3046	Q9NVZ3	NECAP2	Adaptin ear-binding coat-associated protein 2	1	1	1	1	28339	5.32	49.1114	N/A	N/A	Homo sapiens	N/A	0.0253548	1	0.000274165	-11.8327	104103	27677.7	94226.8	39627.2	0	60786.7	0	0
2220	Q16394	EXT1	Exostosin-1	2	2	2	2	86255	4.96	88.3622	N/A	Deamidation (NQ)	Homo sapiens	N/A	0.0201987	1	0.000239034	-12.0305	43444.1	74187.9	122211	30277.5	38934.4	0	0	0
1135	P09488	GSTM1	Glutathione S-transferase Mu 1	9	8	3	3	25712	12.39	178.293	N/A	Carbamidomethylation	Homo sapiens	N/A	0.037248	1	0.000197936	-12.3027	154543	101797	222026	64403.9	0	345299	0	0
1967	Q68D91	MBLAC2	Acyl-coenzyme A thioesterase MBLAC2	3	2	3	2	31372	9.68	86.1265	N/A	N/A	Homo sapiens	N/A	0.0101628	1	0.000161496	-12.5962	124641	27195.8	99000.6	50574.1	0	0	11544.4	0
2348	Q9UM22	EPDR1	Mammalian ependymin-related protein 1	2	2	2	2	25437	8.93	82.7816	N/A	N/A	Homo sapiens	N/A	0.0201949	1	9.30141e-05	-13.3922	100996	438522	269351	145116	0	0	0	129576
2135	P25311	AZGP1	Zinc-alpha-2-glycoprotein	2	2	2	2	34259	12.42	79.1533	N/A	N/A	Homo sapiens	N/A	1.23967e-06	0.00112562	3.38141e-05	-14.852	46845.9	93896.3	7799.9	22294.5	0	0	0	0
