# Supplementary material for: Large extracellular vesicles containing mitochondria (EVMs) derived from Alzheimer’s disease cells harbor pathologic functional and molecular profiles and spread mitochondrial dysfunctions
Source: Research Square preprint supplement (doi:10.21203/rs.3.rs-5932075/v1), 2025-02-13
Supplement: Supplementary file 7 [file f14794ffb73e26fe334fe6b7.xlsx]

## Sheet: Filtre pValue<0,05
																			Ctrl	Ctrl	Ctrl	Ctrl	MCI	MCI	MCI	MCI	MCI	MCI
Protein Group	Accession	Gene	Description	#Peptides DB	#Peptides LFQ	#Unique DB	#Unique LFQ	Avg. Mass	Coverage (%)	-10LgP	MitoPathway	PTM	Taxonomia	Training Data set	p-value	q-value	Fold change	Log2(FC)	CTRL-021 Area	CTRL-69 Area	CTRL-76 Area	CTRL-92 Area	MCI-027 Area	MCI-042 Area	MCI-058 Area	MCI-064 Area	MCI-73 Area	MCI-82 Area
686	P01023	CD9	CD9 antigen	2	2	2	2	25416	15.35	110.046	N/A	Carbamidomethylation; Deamidation (NQ)	Homo sapiens	N/A	4.85942e-10	6.61853e-07	404828	18.627	0	0	0	0	586598	207209	242730	330896	308248	1462730
2196	Q2M2I8	MGP	Matrix Gla protein	2	2	2	2	12353	23.3	106.221	N/A	Deamidation (NQ); Oxidation (M)	Homo sapiens	N/A	8.06675e-07	0.000732461	300375	18.1964	0	0	0	0	72031.1	264780	4910680	1302350	41936.4	143588
191	P49588	ITGA8	Integrin alpha-8	2	2	2	2	117474	2.45	64.4147	N/A	N/A	Homo sapiens	N/A	5.20761e-11	1.41855e-07	104809	16.6774	0	0	0	0	61908.9	123786	118861	131940	199366	55322.7
1708	Q9NRN7	SEC61A1	Protein transport protein Sec61 subunit alpha isoform 1	1	1	1	1	52265	4.2	55.7404	N/A	Carbamidomethylation	Homo sapiens	N/A	0.00402081	0.471501	9787.52	13.2567	0	0	0	0	33613.4	71691.2	0	49935.6	83404.5	87590.9
2986	P80404	TNFAIP8	Tumor necrosis factor alpha-induced protein 8	1	1	1	1	23003	10.1	61.5729	N/A	N/A	Homo sapiens	N/A	0.00415419	0.471501	8649.05	13.0783	0	0	0	0	17645.3	111230	0	57940	60470.8	60874.4
2947	P08183	COX5A	Cytochrome c oxidase subunit 5A, mitochondrial	1	1	1	1	16762	20	47.444	OXPHOS > Complex IV > CIV subunits | OXPHOS > OXPHOS subunits	N/A	Homo sapiens	Tmito	0.00672628	0.495199	4113.88	12.0063	0	0	89090.8	0	13431.2	84919.8	75861.9	84957.4	166996	105004
267	P33527	OGDHL	2-oxoglutarate dehydrogenase-like, mitochondrial	6	5	1	1	114481	0.69	123.455	Metabolism > Carbohydrate metabolism > TCA cycle	N/A	Homo sapiens	Tmito	0.0356483	0.681721	3582.92	11.8069	0	0	0	0	154911	468008	249722	0	116850	0
1039	O15439	ELN	Elastin	1	1	1	1	68398	2.42	42.8064	N/A	N/A	Homo sapiens	N/A	0.0144997	0.608898	2882.14	11.4929	338870	0	0	0	16002.5	157862	140156	140013	77949.3	29260.3
2699	P28288	ACAN	Aggrecan core protein	6	5	6	5	261329	2.45	126.363	N/A	Carbamidomethylation	Homo sapiens	N/A	0.0449453	0.681721	2583.68	11.3352	23587.3	0	0	0	0	48555.9	732040	730452	191166	217104
868	P61221	CPM	Carboxypeptidase M	6	5	6	5	50514	16.48	149.811	N/A	Carbamidomethylation	Homo sapiens	N/A	0.0360315	0.681721	2466.64	11.2683	0	0	0	0	40495.5	283354	0	163855	0	119794
1745	Q8NE71	CAVIN2	Caveolae-associated protein 2	3	2	3	2	47173	6.35	131.09	N/A	N/A	Homo sapiens	N/A	0.0101879	0.56774	2455.12	11.2616	126991	0	0	0	29438.9	46361.4	54917.2	30290.9	41200.2	105950
2154	Q9UG63	PYCR2	Pyrroline-5-carboxylate reductase 2	2	2	1	1	33637	5	96.9193	Metabolism > Amino acid metabolism > Proline metabolism	Acetylation (Protein N-term)	Homo sapiens	Tmito	0.00933974	0.565366	1603.06	10.6466	55073.7	0	0	0	39510.7	30920.1	12569.9	36640	21386.8	18227.6
1575	Q8N2K0	DHX30	ATP-dependent RNA helicase DHX30	1	1	1	1	133938	1.51	49.6908	Mitochondrial central dogma > mtRNA metabolism > mtRNA granules | Mitochondrial central dogma > Translation > Mitochondrial ribosome assembly	N/A	Homo sapiens	Tmito	0.00378499	0.471501	1583.86	10.6292	9975.69	0	0	0	14977.5	23609.4	23852.9	14586.5	11417.7	11197.4
1222	Q96IU4	LYPLA2	Acyl-protein thioesterase 2	1	1	1	1	24737	11.26	63.7083	N/A	N/A	Homo sapiens	N/A	0.0353787	0.681721	1510.03	10.5604	0	0	0	0	0	57705.7	40410.2	0	61148.5	83141.2
1193	Q8IZP0	RAD23A	UV excision repair protein RAD23 homolog A	4	3	2	2	39609	16.53	120.824	N/A	Deamidation (NQ)	Homo sapiens	N/A	0.0152579	0.608898	1255.83	10.2944	105115	0	0	0	17890.1	47315.9	5154.22	29146.7	26610.5	39505.3
1963	Q9NYB9	PML	Protein PML	2	1	2	1	97551	1.36	65.3317	N/A	N/A	Homo sapiens	N/A	0.0353324	0.681721	1193.06	10.2205	0	0	0	0	38726.7	46366.4	0	0	51519.9	31173.3
3113	O94929	GLUD2	Glutamate dehydrogenase 2, mitochondrial	17	17	1	1	61434	2.33	237.74	Metabolism > Amino acid metabolism > Glutamate metabolism | Metabolism > Amino acid metabolism > GABA metabolism	N/A	Homo sapiens	Tpossible_mito	0.00886247	0.549003	860.674	9.74932	19093.3	0	0	0	6833.33	4633.11	14015	11421.4	19987	10587.3
1849	Q15018	NDUFB8	NADH dehydrogenase [ubiquinone] 1 beta subcomplex subunit 8, mitochondrial	2	2	2	2	21766	12.37	74.1608	OXPHOS > Complex I > CI subunits | OXPHOS > OXPHOS subunits	N/A	Homo sapiens	Tmito	0.0489636	0.681721	647.712	9.33921	178281	0	225302	0	245701	181973	273258	453300	357420	300293
1341	P09110	TOMM40	Mitochondrial import receptor subunit TOM40 homolog	4	2	4	2	37893	9.42	97.7613	Protein import, sorting and homeostasis > Protein import and sorting > TOM	N/A	Homo sapiens	Tmito	0.0368887	0.681721	625.241	9.28827	162948	0	0	33597.4	124664	246256	140223	194390	174592	165642
606	P42765	ATP5ME	ATP synthase subunit e, mitochondrial	2	2	2	2	7933	30.43	59.3274	OXPHOS > Complex V > CV subunits | OXPHOS > OXPHOS subunits | Mitochondrial dynamics and surveillance > Cristae formation	N/A	Homo sapiens	Tmito	0.0493822	0.681721	535.409	9.0645	141606	0	125815	0	629743	213188	79880.2	164712	206720	153413
1779	Q9H845	RAB3GAP1	Rab3 GTPase-activating protein catalytic subunit	2	2	2	2	110524	3.16	76.529	N/A	Carbamidomethylation	Homo sapiens	N/A	0.0281134	0.681721	469.932	8.87631	41348.3	0	6891.03	0	7979.26	106315	64579.1	92165.9	89336.5	114835
2239	P11310	GRSF1	G-rich sequence factor 1	1	1	1	1	53126	4.58	59.3531	Mitochondrial central dogma > mtRNA metabolism > mtRNA granules | Mitochondrial central dogma > mtRNA metabolism > Polycistronic mtRNA processing | Mitochondrial central dogma > mtRNA metabolism > mtRNA stability and decay | Mitochondrial central dogma > Translation > Mitochondrial ribosome assembly	N/A	Homo sapiens	Tmito	0.0386031	0.681721	367.023	8.51973	48627	0	23471.2	0	36122.3	90786.6	73454.9	61896.6	92104.8	68629.8
367	P49748	ADGRL2	Adhesion G protein-coupled receptor L2	2	2	2	2	163349	2.4	58.3916	N/A	N/A	Homo sapiens	N/A	0.026475	0.681721	311.285	8.28209	5793.4	0	7101.22	0	2420.78	21082	17813.3	79287.5	32208.1	103411
1483	P16112	SYNE1	Nesprin-1	1	1	1	1	1011086	0.14	46.7999	N/A	N/A	Homo sapiens	N/A	0.0410152	0.681721	302.23	8.2395	49422.6	0	12336	0	40940.9	163128	43098.9	24118.2	66389.4	24892.9
727	P24752	LACTB	Serine beta-lactamase-like protein LACTB, mitochondrial	1	1	1	1	60694	2.74	67.2128	Protein import, sorting and homeostasis > Protein homeostasis > Proteases | Metabolism > Lipid metabolism > Phospholipid metabolism	N/A	Homo sapiens	Tmito	0.0431813	0.681721	282.339	8.14128	35775.2	0	20877.1	0	24597.2	43610.4	24411.8	63101.1	105574	59269.8
1047	Q9BWD1	NUP62	Nuclear pore glycoprotein p62	1	1	1	1	53255	2.68	43.0454	N/A	N/A	Homo sapiens	N/A	0.0431171	0.681721	170.773	7.41593	23761.5	0	4811.35	0	9611.41	18444.3	27169.7	18628.7	23113.5	14619.8
931	P12821	SEC61G	Protein transport protein Sec61 subunit gamma	1	1	1	1	7741	17.65	71.621	N/A	Acetylation (Protein N-term)	Homo sapiens	N/A	0.0482431	0.681721	161.655	7.33678	2175.28	0	47791.3	0	16865.7	5967.6	25731.7	15166.8	16171.8	29779
134	P53396	AP3B1	AP-3 complex subunit beta-1	13	12	13	12	121320	12.07	173.992	N/A	Carbamidomethylation	Homo sapiens	N/A	0.0167922	0.618134	11.7472	3.55425	2790040	1433280	112000000	1979290	45800000	57600000	45700000	75400000	90300000	84500000
446	P21399	TNC	Tenascin	96	93	96	93	240853	59.84	485.657	N/A	Carbamidomethylation; Deamidation (NQ); Oxidation (M)	Homo sapiens	N/A	0.00614765	0.495199	5.03523	2.33206	47300000	33000000	6575490	41100000	83100000	121000000	253000000	163000000	160000000	67300000
333	Q99798	CARHSP1	Calcium-regulated heat-stable protein 1	2	2	2	2	15892	16.33	68.0246	N/A	N/A	Homo sapiens	N/A	0.0120884	0.56774	4.74226	2.24557	499997	189922	49714.1	41214.4	443800	709990	437263	646937	736778	470046
1739	Q86TX2	COL6A2	Collagen alpha-2(VI) chain	35	34	35	34	108579	35.72	371.352	N/A	Carbamidomethylation; Deamidation (NQ); Oxidation (M)	Homo sapiens	N/A	0.0124578	0.568269	4.51254	2.17394	20700000	12100000	23800000	17600000	41400000	29400000	130000000	57000000	90900000	350000000
2673	Q9NPJ3	COL6A6	Collagen alpha-6(VI) chain	4	4	4	4	247173	1.9	121.06	N/A	N/A	Homo sapiens	N/A	0.0108619	0.56774	4.47372	2.16147	176266	27618.8	296801	86927.9	460943	486951	706401	672447	454907	232672
1829	O00154	TTN	Titin	3	3	3	3	3816030	0.08	68.9868	N/A	Deamidation (NQ)	Homo sapiens	N/A	0.0117113	0.56774	4.1447	2.05127	385523	446213	249443	268419	2305900	2637890	1294970	272463	1508680	1935350
1760	Q9Y305	COL6A3	Collagen alpha-3(VI) chain	187	185	187	185	343669	63.64	538.321	N/A	Carbamidomethylation; Deamidation (NQ); Oxidation (M)	Homo sapiens	N/A	0.0072324	0.518449	3.89156	1.96035	165000000	89900000	88300000	139000000	262000000	208000000	685000000	343000000	466000000	1430000000
2889	Q15067	AKR1C2	Aldo-keto reductase family 1 member C2	17	17	2	2	36735	6.81	272.134	N/A	Oxidation (M)	Homo sapiens	N/A	0.0336406	0.681721	3.60387	1.84955	165105	100148	507076	107552	1005550	668479	131589	873742	677256	1133470
1782	P24666	COL6A1	Collagen alpha-1(VI) chain	45	44	45	44	108529	50.29	411.344	N/A	Carbamidomethylation; Deamidation (NQ); Oxidation (M)	Homo sapiens	N/A	0.0120226	0.56774	3.58473	1.84186	43900000	31300000	50100000	38200000	73900000	70600000	204000000	97300000	170000000	514000000
2116	O95573	COL16A1	Collagen alpha-1(XVI) chain	7	7	7	7	157751	5.61	199.067	N/A	Carbamidomethylation; Deamidation (NQ)	Homo sapiens	N/A	0.000518761	0.201872	3.51567	1.8138	652036	724670	293322	419905	1123340	1243720	2285990	1990760	2123970	1963060
1153	O60488	NDUFS1	NADH-ubiquinone oxidoreductase 75 kDa subunit, mitochondrial	9	8	9	8	79467	16.64	185.461	OXPHOS > Complex I > CI subunits | Metabolism > Metals and cofactors > Fe-S-containing proteins | OXPHOS > OXPHOS subunits	Carbamidomethylation	Homo sapiens	Tmito	0.0466493	0.681721	3.33066	1.73581	511207	121302	367181	37510.5	513055	804699	379565	762974	853126	334059
2120	Q9NR19	TMEM14C	Transmembrane protein 14C	1	1	1	1	11565	25.89	88.5392	0	Deamidation (NQ)	Homo sapiens	Tmito	0.0104432	0.56774	3.29966	1.72232	131059	32495	44633.2	17759.9	155086	185037	101905	193699	132097	106990
72	P62736	COL2A1	Collagen alpha-1(II) chain	7	7	2	2	141785	2.22	172.07	N/A	Deamidation (NQ)	Homo sapiens	N/A	0.00668653	0.495199	3.19223	1.67456	498459	468753	406709	167249	1583910	460881	1844290	1278600	1197960	1028170
50	P60709	PSMA4	Proteasome subunit alpha type-4	9	8	9	8	29484	33.33	208.347	N/A	Carbamidomethylation; Oxidation (M)	Homo sapiens	N/A	0.0150529	0.608898	3.16864	1.66386	6964360	15200000	12600000	2428790	21900000	21900000	30800000	28200000	35000000	12800000
301	Q562R1	TTYH3	Protein tweety homolog 3	4	4	4	4	57545	10.33	134.468	N/A	Acetylation (Protein N-term)	Homo sapiens	N/A	0.0125169	0.568269	3.15472	1.65751	130865	43458.1	169340	76621.1	175948	305557	190627	250290	322954	754269
71	P68032	GORASP2	Golgi reassembly-stacking protein 2	3	3	3	3	47145	13.27	132.364	N/A	Carbamidomethylation; Deamidation (NQ)	Homo sapiens	N/A	0.0032732	0.470999	3.10041	1.63246	74227.8	43849.9	155464	50863.9	200010	170050	185255	255658	185641	387837
44	P63261	RAB9A	Ras-related protein Rab-9A	5	5	5	5	22838	26.37	147.655	N/A	Deamidation (NQ)	Homo sapiens	N/A	0.0421915	0.681721	3.04169	1.60487	11300000	9368440	1219740	8376660	23900000	22300000	22500000	9139600	21600000	11900000
32	P12814	VCAN	Versican core protein	19	19	19	19	372820	7.16	250.937	N/A	Carbamidomethylation; Deamidation (NQ); Oxidation (M)	Homo sapiens	N/A	0.000106138	0.0722801	3.02222	1.59561	6617450	7683460	5290410	4720880	15000000	15500000	28900000	18500000	19000000	14600000
22	O43707	DDTL	D-dopachrome decarboxylase-like protein	4	4	4	4	14195	35.07	123.252	N/A	Carbamidomethylation	Homo sapiens	N/A	0.0454518	0.681721	2.99768	1.58385	710509	474751	982768	231739	350574	2449740	2565440	1392440	2409390	2090240
1730	Q9NZ32	IAH1	Isoamyl acetate-hydrolyzing esterase 1 homolog	4	4	4	4	27599	24.19	122.063	N/A	Acetylation (Protein N-term); Carbamidomethylation	Homo sapiens	N/A	0.0481655	0.681721	2.95278	1.56207	107779	104835	378823	26965.3	212483	342987	277663	364361	536733	207680
461	P61163	SGCD	Delta-sarcoglycan	9	9	9	9	32071	38.75	202.955	N/A	Carbamidomethylation; Oxidation (M)	Homo sapiens	N/A	0.000961654	0.291061	2.92633	1.54909	5941960	9185740	8950160	6113690	20800000	15500000	41700000	22300000	23100000	14800000
652	P42025	ACAD9	Complex I assembly factor ACAD9, mitochondrial	4	4	4	4	68760	13.2	139.262	OXPHOS > Complex I > CI assembly factors | OXPHOS > OXPHOS assembly factors	Carbamidomethylation	Homo sapiens	Tmito	0.0407409	0.681721	2.88812	1.53013	144820	22161.1	55847.4	17574.7	152607	159412	67388.6	114372	85790	201706
486	P61160	MMP2	72 kDa type IV collagenase	37	37	37	37	73882	69.39	357.654	N/A	Carbamidomethylation; Deamidation (NQ); Oxidation (M)	Homo sapiens	N/A	0.00794921	0.541341	2.84265	1.50724	26200000	7690290	20400000	9618320	45900000	21900000	50900000	46700000	30400000	57100000
217	P61158	IPO4	Importin-4	5	4	5	4	118715	5.27	137.387	N/A	Carbamidomethylation	Homo sapiens	N/A	0.0232256	0.681721	2.77287	1.47138	165584	32953.5	36280	54920.4	77277	260594	131552	202618	196885	154192
2180	Q03154	GBP1	Guanylate-binding protein 1	5	4	5	4	67931	7.6	127.818	N/A	N/A	Homo sapiens	N/A	0.03193	0.681721	2.7502	1.45954	235274	50407.5	200228	89315.2	202603	519002	318311	195943	727008	280304
1019	P00813	IFT27	Intraflagellar transport protein 27 homolog	3	3	3	3	20480	24.19	103.518	N/A	Carbamidomethylation	Homo sapiens	N/A	0.0430873	0.681721	2.73595	1.45204	388488	189845	321834	43748.7	348075	797073	451496	383532	546402	534650
1454	O14672	PGRMC1	Membrane-associated progesterone receptor component 1	12	11	11	10	21671	57.95	253.914	N/A	Deamidation (NQ); Oxidation (M)	Homo sapiens	N/A	0.0432664	0.681721	2.68823	1.42666	1669480	787829	4366130	1286160	4465020	3334650	2139270	3230810	11000000	6692100
2461	Q13444	AKR1C3	Aldo-keto reductase family 1 member C3	15	15	6	6	36853	29.72	223.949	N/A	Carbamidomethylation; Oxidation (M)	Homo sapiens	N/A	0.0254997	0.681721	2.61089	1.38454	670621	331674	1282480	294585	1420660	920596	792719	1460890	2285490	2229120
2212	P78536	HMOX1	Heme oxygenase 1	6	5	6	5	32819	27.08	173.47	N/A	Deamidation (NQ)	Homo sapiens	N/A	0.0386778	0.681721	2.60566	1.38165	387267	129897	340362	151523	257990	414613	1485440	461690	585771	962435
1261	Q13443	PIR	Pirin	1	1	1	1	32113	4.14	58.3141	N/A	N/A	Homo sapiens	N/A	0.005558	0.495199	2.57882	1.36671	16998.4	17846	36192.2	11839.8	35047.6	34898.4	46131	46815.1	63898.7	81667.4
1028	Q9UHI8	AP3S1	AP-3 complex subunit sigma-1	3	3	3	3	21732	19.69	117.949	N/A	N/A	Homo sapiens	N/A	0.027151	0.681721	2.57458	1.36434	475629	66973.2	129832	169181	252787	537977	448224	517763	414199	412324
1375	Q76LX8	SCARB2	Lysosome membrane protein 2	12	12	12	12	54290	28.03	237.665	N/A	Carbamidomethylation; Deamidation (NQ); Oxidation (M)	Homo sapiens	N/A	0.0163172	0.608898	2.57251	1.36318	14800000	5358150	25500000	8298300	29500000	30800000	17800000	24500000	37500000	42400000
2268	Q9UKP4	TIMP1	Metalloproteinase inhibitor 1	7	6	7	6	23171	44.44	182.22	N/A	Carbamidomethylation	Homo sapiens	N/A	0.0360364	0.681721	2.56659	1.35985	411580	257075	708103	390557	557062	745384	831633	1283550	890293	3625930
1707	O60503	P4HA2	Prolyl 4-hydroxylase subunit alpha-2	21	20	21	20	60902	44.11	298.891	N/A	Carbamidomethylation; Deamidation (NQ); Oxidation (M)	Homo sapiens	N/A	0.0181013	0.64879	2.54449	1.34738	4347120	1374730	6314730	2092880	7569550	7634840	4933830	5890300	10700000	10600000
690	P35611	DLAT	Dihydrolipoyllysine-residue acetyltransferase component of pyruvate dehydrogenase complex, mitochondrial	4	4	4	4	68997	7.11	108.953	Metabolism > Carbohydrate metabolism > Pyruvate metabolism	Carbamidomethylation	Homo sapiens	Tmito	0.0229294	0.681721	2.54149	1.34568	387298	100638	186842	79620.7	343998	396935	210437	469060	516816	540173
1252	Q9UEY8	MXRA5	Matrix-remodeling-associated protein 5	92	88	92	88	312150	35.89	414.087	N/A	Carbamidomethylation; Deamidation (NQ); Oxidation (M)	Homo sapiens	N/A	0.0261646	0.681721	2.53948	1.34454	32300000	21700000	10200000	23200000	40400000	43000000	22900000	61400000	121000000	61300000
1643	Q96PE1	PLSCR4	Phospholipid scramblase 4	3	3	3	3	37005	12.46	99.3476	N/A	N/A	Homo sapiens	N/A	0.015011	0.608898	2.51754	1.33202	386363	289633	487541	113732	417189	638652	1051010	823590	819706	658250
1000	P48960	QDPR	Dihydropteridine reductase	4	3	4	3	25789	16.8	127.972	Metabolism > Metals and cofactors > Tetrahydrobiopterin synthesis | Metabolism > Vitamin metabolism > Folate and 1-C metabolism	Carbamidomethylation	Homo sapiens	Tmito	0.0379181	0.681721	2.48992	1.3161	707100	142467	224327	191049	440349	458105	680378	894675	1341270	410448
2287	O95490	HYOU1	Hypoxia up-regulated protein 1	36	34	36	34	111335	41.34	321.349	N/A	Carbamidomethylation; Deamidation (NQ)	Homo sapiens	N/A	0.0157282	0.608898	2.48623	1.31396	5353230	1722270	5537000	2832970	5744460	7866640	5674220	8931540	11800000	15200000
857	P11766	TMX1	Thioredoxin-related transmembrane protein 1	7	7	7	7	31791	24.29	144.102	N/A	Carbamidomethylation	Homo sapiens	N/A	0.0444762	0.681721	2.47719	1.3087	1426100	286160	1610920	575294	1332320	1871730	1106650	2395140	2845390	2857640
2301	Q9BV57	BAG5	BAG family molecular chaperone regulator 5	3	2	3	2	51200	8.28	85.4179	N/A	Carbamidomethylation; Deamidation (NQ)	Homo sapiens	N/A	0.0193866	0.668469	2.45687	1.29682	77606.4	26362	13378.8	22585.9	71087.2	61305.2	50104.3	71194.4	79691.4	86292
713	P55263	MRPS23	28S ribosomal protein S23, mitochondrial	1	1	1	1	21771	5.26	59.1661	Mitochondrial central dogma > Translation > Mitochondrial ribosome	N/A	Homo sapiens	Tmito	0.013363	0.587109	2.40823	1.26797	19303.6	14220.6	35391.3	8459.5	32430.6	25688.5	51572.8	42536.4	51969.7	48390.1
932	Q9BRR6	LPXN	Leupaxin	9	8	9	8	43332	29.02	187.499	N/A	Carbamidomethylation; Deamidation (NQ)	Homo sapiens	N/A	0.0224289	0.681721	2.36846	1.24395	3688190	3217620	3066350	1051010	7487000	7732180	4097280	3264210	8926720	6040700
1768	P08913	COL15A1	Collagen alpha-1(XV) chain	10	9	10	9	141720	7.13	194.882	N/A	Carbamidomethylation	Homo sapiens	N/A	0.00982476	0.56774	2.35695	1.23692	1278660	823841	739779	785902	3912440	1172240	1561440	1719020	2027630	3291880
2859	Q16186	IDH3A	Isocitrate dehydrogenase [NAD] subunit alpha, mitochondrial	6	6	6	6	39592	20.22	144.501	Metabolism > Carbohydrate metabolism > TCA cycle	Carbamidomethylation	Homo sapiens	Tmito	0.0410954	0.681721	2.34371	1.2288	1259630	301919	1105860	284525	1126520	1232070	929986	1640330	2008800	1613000
1072	P30566	MRPS34	28S ribosomal protein S34, mitochondrial	2	2	2	2	25650	10.09	82.7192	Mitochondrial central dogma > Translation > Mitochondrial ribosome	N/A	Homo sapiens	Tmito	0.0192244	0.668469	2.3159	1.21157	113749	33445.7	83362.2	26429.9	110037	101574	121301	145289	136670	139077
1122	P30520	TMEM33	Transmembrane protein 33	3	3	3	3	27978	12.55	98.4317	N/A	N/A	Homo sapiens	N/A	0.0415282	0.681721	2.31143	1.20879	772490	103581	323748	261206	456963	755656	853120	760540	604013	627258
156	Q8IUX7	RETREG3	Reticulophagy regulator 3	2	2	2	2	51396	7.08	65.9393	N/A	N/A	Homo sapiens	N/A	0.0473324	0.681721	2.28287	1.19085	310824	91419.8	164186	44893.6	194964	307248	206771	275162	350472	359187
1812	Q9Y4W6	GOT1	Aspartate aminotransferase, cytoplasmic	15	15	15	15	46248	55.45	243.657	N/A	Carbamidomethylation; Deamidation (NQ)	Homo sapiens	N/A	0.0235968	0.681721	2.24955	1.16963	12800000	6517410	8530740	2584970	11900000	13000000	21900000	13500000	16200000	13800000
963	P02771	RPS19	40S ribosomal protein S19	5	5	5	5	16060	30.34	132.421	N/A	Deamidation (NQ)	Homo sapiens	N/A	0.0185954	0.657841	2.23598	1.1609	1936160	441908	1365950	1136020	2484840	3124360	2765100	1783970	2610600	1912260
2321	P52594	FLT1	Vascular endothelial growth factor receptor 1	2	2	1	1	150769	0.75	68.2313	N/A	Deamidation (NQ)	Homo sapiens	N/A	0.044121	0.681721	2.23339	1.15924	170468	168552	49317.9	165529	355932	164038	395089	323102	409264	146159
1840	Q53H12	COL3A1	Collagen alpha-1(III) chain	71	70	69	68	138564	57.71	434.795	N/A	Carbamidomethylation; Deamidation (NQ); Oxidation (M)	Homo sapiens	N/A	0.00328524	0.470999	2.19255	1.13261	86500000	104000000	89600000	86600000	183000000	111000000	334000000	188000000	249000000	204000000
2237	O00116	MVB12A	Multivesicular body subunit 12A	2	2	2	2	28783	12.09	93.1953	N/A	Carbamidomethylation	Homo sapiens	N/A	0.0377509	0.681721	2.16776	1.1162	126874	40058.9	26398.4	34914.5	82576	88849.8	91360.9	75598.8	129222	160665
45	O00468	KIF5B	Kinesin-1 heavy chain	52	51	40	39	109685	47.66	370.552	N/A	Acetylation (Protein N-term); Carbamidomethylation; Deamidation (NQ); Oxidation (M)	Homo sapiens	N/A	0.0255932	0.681721	2.1291	1.09024	36600000	23800000	19900000	21900000	57400000	116000000	55700000	28500000	61900000	33300000
2519	Q6RW13	COL1A1	Collagen alpha-1(I) chain	87	86	83	82	138911	79.99	521.549	N/A	Carbamidomethylation; Deamidation (NQ); Oxidation (M)	Homo sapiens	N/A	0.00213064	0.470999	2.12802	1.08951	878000000	730000000	640000000	773000000	1780000000	1190000000	2530000000	1530000000	1890000000	1070000000
403	P23526	ECM1	Extracellular matrix protein 1	28	28	28	28	60674	68.52	332.339	N/A	Carbamidomethylation; Deamidation (NQ); Oxidation (M)	Homo sapiens	N/A	0.0250836	0.681721	2.11579	1.0812	27900000	13800000	14600000	21600000	43000000	19300000	80700000	46500000	36600000	33300000
1143	O43865	TTC7B	Tetratricopeptide repeat protein 7B	2	2	2	2	94179	2.85	75.3635	N/A	N/A	Homo sapiens	N/A	0.0414692	0.681721	2.11524	1.08082	64460.5	40690.6	39948.3	14339	75028	131137	43865.3	75253.6	78267.9	64891.5
6	Q09666	CYC1	Cytochrome c1, heme protein, mitochondrial	6	6	6	6	35422	26.15	156.174	OXPHOS > Complex III > CIII subunits | Metabolism > Metals and cofactors > Heme-containing proteins | Metabolism > Electron carriers > Cytochromes | OXPHOS > OXPHOS subunits	Carbamidomethylation	Homo sapiens	Tmito	0.0370106	0.681721	2.11174	1.07843	3428430	1173980	2875670	846050	3968580	3361030	2469020	3830550	3956600	5444610
253	Q8IVF2	TM9SF3	Transmembrane 9 superfamily member 3	4	4	4	4	67888	8.15	118.953	N/A	Carbamidomethylation	Homo sapiens	N/A	0.035581	0.681721	2.10257	1.07215	270405	114240	366774	163161	346223	403678	247786	459128	505354	854617
1900	O95433	SLC25A24	Calcium-binding mitochondrial carrier protein SCaMC-1	18	17	18	17	53354	42.14	238.359	Metabolism > Nucleotide metabolism > Nucleotide import | Signaling > Calcium homeostasis > EF hand proteins | Small molecule transport > SLC25A family	Carbamidomethylation; Oxidation (M)	Homo sapiens	Tmito	0.0429709	0.681721	2.09129	1.0644	4465630	1066880	2754900	1045570	4196180	3529460	2752420	4274750	4814180	5069470
1180	P02765	LRRN4CL	LRRN4 C-terminal-like protein	4	4	4	4	25262	30.67	160.751	N/A	Carbamidomethylation	Homo sapiens	N/A	0.0404021	0.681721	2.08059	1.05699	1374000	651692	1463630	450428	1170250	1864290	1949540	1164090	2865420	2593260
872	Q96BJ3	RER1	Protein RER1	3	3	3	3	22958	20.41	90.2173	N/A	Acetylation (Protein N-term)	Homo sapiens	N/A	0.0479705	0.681721	2.05958	1.04235	425131	126445	537916	185874	558202	445296	371466	575146	642754	881090
2299	O95831	LAMC1	Laminin subunit gamma-1	79	79	79	79	177603	57.18	491.36	N/A	Carbamidomethylation; Deamidation (NQ); Oxidation (M)	Homo sapiens	N/A	0.0112245	0.56774	2.05812	1.04133	43500000	45500000	67300000	32300000	71300000	73000000	163000000	129000000	92500000	67000000
2645	Q96NN9	VNN1	Pantetheinase	2	2	2	2	57012	5.46	76.5044	N/A	Carbamidomethylation	Homo sapiens	N/A	0.00253014	0.470999	2.01686	1.01211	127327	136295	81928.7	157906	202422	216956	201323	253438	276005	366102
2393	Q12904	AKAP12	A-kinase anchor protein 12	12	11	12	11	191482	9.88	207.191	N/A	Deamidation (NQ)	Homo sapiens	N/A	0.0300278	0.681721	2.00497	1.00358	607225	171371	662783	345437	636929	1085940	691592	749837	791539	841385
1126	Q13155	HEG1	Protein HEG homolog 1	2	2	2	2	147461	1.59	68.1488	N/A	Carbamidomethylation	Homo sapiens	N/A	0.0418278	0.681721	2.00079	1.00057	72263.6	31826.4	97750.8	55004.4	120706	98638.9	61461.5	111548	209163	163387
636	P00568	TOR1A	Torsin-1A	2	2	2	2	37809	7.23	73.5908	N/A	N/A	Homo sapiens	N/A	0.023857	0.681721	1.99143	0.993807	117178	52113.5	90868	49809.1	91272.9	109595	121310	162751	205325	223500
2325	P54819	GLG1	Golgi apparatus protein 1	21	20	21	20	134552	20.02	247.204	N/A	Carbamidomethylation; Deamidation (NQ)	Homo sapiens	N/A	0.0487903	0.681721	1.98473	0.98894	1747420	669833	3224190	1176230	3052710	3682070	1756950	3153780	3481900	2635930
1120	Q9UIJ7	IPO5	Importin-5	33	31	33	31	123630	42.57	322.121	N/A	Acetylation (Protein N-term); Carbamidomethylation; Deamidation (NQ); Oxidation (M)	Homo sapiens	N/A	0.0028791	0.470999	1.98058	0.985925	6230790	2939600	4135300	4269430	5610790	9899660	8153720	8746920	9416880	9409340
3026	P27144	EIF5A2	Eukaryotic translation initiation factor 5A-2	10	10	1	1	16793	7.84	212.821	N/A	N/A	Homo sapiens	N/A	0.0206914	0.681721	1.96916	0.977583	77516.9	78496.7	103116	52288.4	100987	243574	220227	100155	182465	110673
1230	Q9Y6K8	AIMP1	Aminoacyl tRNA synthase complex-interacting multifunctional protein 1	2	2	2	2	34353	10.58	63.2792	N/A	N/A	Homo sapiens	N/A	0.0417063	0.681721	1.96687	0.975902	4118330	3911250	2442250	2700860	8547110	9675310	7824470	2654780	8453840	4366420
760	Q02952	HSPD1	60 kDa heat shock protein, mitochondrial	39	39	39	39	61055	69.11	372.758	Protein import, sorting and homeostasis > Protein homeostasis > Chaperones	Acetylation (Protein N-term); Carbamidomethylation; Deamidation (NQ); Oxidation (M)	Homo sapiens	Tmito	0.0107349	0.56774	1.95922	0.970278	25500000	12200000	22000000	10900000	31000000	27000000	23300000	41800000	35700000	39600000
1428	Q9Y2D5	FTH1	Ferritin heavy chain	12	12	12	12	21226	63.39	250.068	Metabolism > Metals and cofactors > Iron homeostasis	Carbamidomethylation; Deamidation (NQ); Oxidation (M)	Homo sapiens	Tpossible_mito	0.0312246	0.681721	1.95676	0.968467	11200000	6574240	11700000	5886090	10900000	13000000	11100000	21900000	18800000	31300000
555	P14550	FBLN5	Fibulin-5	1	1	1	1	50180	2.46	67.8653	N/A	N/A	Homo sapiens	N/A	0.0370177	0.681721	1.93901	0.955318	184795	129283	134323	74074.3	260515	204669	131953	292690	200815	471025
666	P15121	IPO9	Importin-9	4	3	4	3	115963	5.28	126.947	N/A	Acetylation (Protein N-term)	Homo sapiens	N/A	0.044283	0.681721	1.93456	0.952005	235572	50302.2	78968.1	142121	177724	240914	198690	175435	221290	243422
303	Q04828	PCOLCE	Procollagen C-endopeptidase enhancer 1	28	27	28	27	47972	76.61	359.495	N/A	Carbamidomethylation; Deamidation (NQ); Oxidation (M)	Homo sapiens	N/A	0.0374819	0.681721	1.93331	0.951076	239000000	261000000	100000000	279000000	594000000	278000000	470000000	378000000	534000000	242000000
484	P52895	NID2	Nidogen-2	68	68	67	67	151254	59.05	444.537	N/A	Carbamidomethylation; Deamidation (NQ); Oxidation (M)	Homo sapiens	N/A	0.00243504	0.470999	1.93215	0.950208	89800000	83800000	95200000	75500000	125000000	150000000	281000000	174000000	166000000	136000000
469	P42330	MCM3	DNA replication licensing factor MCM3	5	4	5	4	90981	6.68	131.26	N/A	Acetylation (Protein N-term)	Homo sapiens	N/A	0.00618253	0.495199	1.92681	0.946212	411016	264468	180261	312354	420709	812727	518197	533359	553359	468544
976	O43488	DMBT1	Deleted in malignant brain tumors 1 protein	2	2	2	2	260735	1.12	128.503	N/A	Carbamidomethylation	Homo sapiens	N/A	0.00534788	0.495199	1.9235	0.943733	3166440	2596420	3266800	2894280	5069480	3815450	5357500	10400000	5813430	5540240
1423	Q8NHP1	TSPAN4	Tetraspanin-4	3	3	3	3	26118	17.23	140.586	N/A	Carbamidomethylation; Deamidation (NQ)	Homo sapiens	N/A	0.0440917	0.681721	1.92343	0.943682	489872	204907	379793	154947	317157	572295	519373	450620	603627	896520
1568	P13716	SLC16A1	Monocarboxylate transporter 1	10	10	10	10	53944	18	208.577	N/A	Carbamidomethylation; Deamidation (NQ)	Homo sapiens	N/A	0.0232661	0.681721	1.91775	0.939416	26600000	12500000	19200000	13800000	32900000	19100000	29900000	57100000	42100000	28800000
216	P02768	SEC11A	Signal peptidase complex catalytic subunit SEC11A	1	1	1	1	20625	4.47	42.4878	N/A	N/A	Homo sapiens	N/A	0.0291023	0.681721	1.91004	0.933606	296052	110256	418262	173304	374824	436648	333938	443664	468352	492096
222	Q13740	COL1A2	Collagen alpha-2(I) chain	91	90	91	90	129314	84.99	506.154	N/A	Carbamidomethylation; Deamidation (NQ); Oxidation (M)	Homo sapiens	N/A	0.00850788	0.549003	1.89718	0.92386	584000000	447000000	453000000	510000000	1020000000	606000000	1420000000	956000000	1280000000	643000000
1582	Q8IZ83	LRRC15	Leucine-rich repeat-containing protein 15	19	19	19	19	64366	51.81	297.692	N/A	Carbamidomethylation; Deamidation (NQ); Oxidation (M)	Homo sapiens	N/A	0.0498432	0.681721	1.88936	0.917897	18300000	11800000	12000000	7171900	14600000	20000000	33500000	17500000	15300000	44000000
1631	P54886	SERPINH1	Serpin H1	24	24	24	24	46441	66.99	357.12	N/A	Deamidation (NQ); Oxidation (M)	Homo sapiens	N/A	0.0387374	0.681721	1.88519	0.914707	42200000	16700000	55200000	26800000	44000000	60400000	43700000	58600000	76400000	91900000
1021	P30837	LPCAT1	Lysophosphatidylcholine acyltransferase 1	2	2	2	2	59151	5.06	95.5365	N/A	Carbamidomethylation	Homo sapiens	N/A	0.0406484	0.681721	1.88418	0.91394	77370.6	44921.7	37289.3	81783.2	74403.1	178583	110570	90482.8	68468.6	169643
281	Q3SY69	CS	Citrate synthase, mitochondrial	16	16	16	16	51712	48.5	234.53	Metabolism > Carbohydrate metabolism > TCA cycle	Carbamidomethylation; Deamidation (NQ); Oxidation (M)	Homo sapiens	Tmito	0.0425763	0.681721	1.8792	0.910116	9554900	2878910	6646180	3145860	13000000	10200000	6193740	9820450	8848920	8510640
1063	P05091	GRB2	Growth factor receptor-bound protein 2	2	1	2	1	25206	13.36	82.5585	N/A	N/A	Homo sapiens	N/A	0.0310625	0.681721	1.82	0.863936	19014.8	15039.2	30009.3	19300	24277.1	31646.8	24250.5	45325.3	45497.5	63759.2
1890	P51648	MYH10	Myosin-10	99	97	71	69	228999	37.85	428.571	N/A	Carbamidomethylation; Deamidation (NQ); Oxidation (M)	Homo sapiens	N/A	0.01627	0.608898	1.81888	0.863052	16800000	8740830	12400000	12200000	18300000	39000000	20000000	27200000	19300000	16000000
1443	P43353	LETM1	Mitochondrial proton/calcium exchanger protein	7	7	7	7	83354	12.72	158.109	Signaling > Calcium homeostasis > Calcium cycle	Carbamidomethylation	Homo sapiens	Tmito	0.0359385	0.681721	1.81406	0.859221	725166	360999	673539	287040	717973	821452	528555	1081970	1129320	1065300
2410	P30038	CHMP2A	Charged multivesicular body protein 2a	3	3	3	3	25104	16.22	104.431	N/A	N/A	Homo sapiens	N/A	0.0278832	0.681721	1.80339	0.850708	843250	323151	394118	529256	741910	598375	762316	939963	1180270	1241540
464	P49419	ATP5PO	ATP synthase subunit O, mitochondrial	10	10	10	10	23277	57.75	209.611	OXPHOS > Complex V > CV subunits | OXPHOS > OXPHOS subunits	Carbamidomethylation; Deamidation (NQ)	Homo sapiens	Tmito	0.00886789	0.549003	1.79975	0.847797	6533930	3410120	6623610	3667520	8284090	6937720	10400000	9742800	10400000	7066100
2710	Q9H2A2	ENO2	Gamma-enolase	11	11	7	7	47269	27.42	257.68	N/A	Carbamidomethylation; Deamidation (NQ)	Homo sapiens	N/A	0.0118152	0.56774	1.79969	0.847745	1767510	892961	963061	805743	1314560	2239330	2250410	2099590	2131840	1553090
753	P49189	LAMA4	Laminin subunit alpha-4	85	85	85	85	202524	49.64	450.909	N/A	Carbamidomethylation; Deamidation (NQ); Oxidation (M)	Homo sapiens	N/A	0.0201544	0.681721	1.79421	0.843349	50900000	40700000	46000000	31800000	61300000	65500000	125000000	108000000	67500000	48100000
115	P04075	SPTBN1	Spectrin beta chain, non-erythrocytic 1	111	110	109	108	274609	55.33	426.61	N/A	Carbamidomethylation; Deamidation (NQ); Oxidation (M)	Homo sapiens	N/A	0.0155876	0.608898	1.78741	0.837867	39200000	22500000	44200000	24100000	37900000	70500000	46100000	65100000	72900000	50800000
1683	P05062	KPNB1	Importin subunit beta-1	30	30	30	30	97170	46	311.279	N/A	Acetylation (Protein N-term); Carbamidomethylation; Deamidation (NQ); Oxidation (M)	Homo sapiens	N/A	0.0141469	0.608898	1.76761	0.821803	16400000	6793320	11700000	10300000	12700000	23200000	17800000	20900000	22200000	19500000
825	P09972	TUBB6	Tubulin beta-6 chain	27	26	12	11	49857	44.17	347.311	N/A	Carbamidomethylation; Deamidation (NQ); Oxidation (M)	Homo sapiens	N/A	0.03916	0.681721	1.75125	0.808385	11500000	3655000	5416630	5013110	7211100	13100000	9742480	9581650	9206990	13700000
1624	Q86V81	DNAJA2	DnaJ homolog subfamily A member 2	11	11	11	11	45746	39.08	217.723	N/A	Carbamidomethylation; Deamidation (NQ)	Homo sapiens	N/A	0.0227196	0.681721	1.73407	0.794161	4940790	2073190	4161690	2919160	5917060	3788140	6919020	5387110	5999230	7530270
2885	P02760	RPL36	60S ribosomal protein L36	2	2	2	2	12254	20	74.1876	N/A	Carbamidomethylation; Oxidation (M)	Homo sapiens	N/A	0.0368401	0.681721	1.71832	0.781001	586736	214489	658475	334093	648339	706462	781462	652868	598240	848223
2414	Q9Y303	NID1	Nidogen-1	47	44	46	43	136377	54.93	376.552	N/A	Carbamidomethylation; Deamidation (NQ); Oxidation (M)	Homo sapiens	N/A	0.0310923	0.681721	1.70879	0.772978	24800000	25400000	28000000	15900000	33200000	27500000	64400000	46800000	49400000	27200000
2463	Q9Y2J4	HSPG2	Basement membrane-specific heparan sulfate proteoglycan core protein	225	223	225	223	468830	74.24	671.455	N/A	Carbamidomethylation; Deamidation (NQ); Oxidation (M)	Homo sapiens	N/A	0.0159234	0.608898	1.69179	0.758553	2680000000	2310000000	1350000000	2150000000	3870000000	2960000000	4520000000	3420000000	4310000000	2340000000
2448	Q01433	CYCS	Cytochrome c	3	3	3	3	11749	31.43	111.011	Metabolism > Metals and cofactors > Heme-containing proteins | Metabolism > Electron carriers > Cytochromes | OXPHOS > OXPHOS subunits | OXPHOS > Cytochrome C | Mitochondrial dynamics and surveillance > Apoptosis	N/A	Homo sapiens	Tmito	0.0426465	0.681721	1.67237	0.741891	366538	207459	437412	153610	393268	489739	334869	487136	554044	458995
1354	P0DUB6	UACA	Uveal autoantigen with coiled-coil domains and ankyrin repeats	24	21	24	21	162505	19.21	234.977	N/A	Carbamidomethylation	Homo sapiens	N/A	0.0239653	0.681721	1.66577	0.736187	11500000	4954900	5233650	9110870	12800000	15200000	9242280	11500000	11800000	12400000
1421	P04746	APOA4	Apolipoprotein A-IV	3	3	3	3	45372	5.05	103.667	N/A	Deamidation (NQ)	Homo sapiens	N/A	0.049802	0.681721	1.63517	0.709444	1573460	693171	1067960	901189	2834710	1267750	1279440	2037270	1646190	1333190
729	Q9UKU9	RAB5C	Ras-related protein Rab-5C	10	10	7	7	23483	56.94	234.526	N/A	Carbamidomethylation; Deamidation (NQ); Oxidation (M)	Homo sapiens	N/A	0.00761094	0.531595	1.62562	0.700987	16200000	13900000	16400000	11200000	23100000	16300000	19200000	28200000	29400000	25900000
3058	Q9Y5C1	PLG	Plasminogen	6	6	6	6	90569	8.4	187.808	N/A	Carbamidomethylation; Deamidation (NQ); Oxidation (M)	Homo sapiens	N/A	0.0163178	0.608898	1.58572	0.665139	14100000	6873880	10200000	10900000	12900000	17800000	15000000	20900000	13500000	18300000
2443	Q01484	PDGFD	Platelet-derived growth factor D	4	4	4	4	42848	12.43	115.524	N/A	Carbamidomethylation	Homo sapiens	N/A	0.031911	0.681721	1.5263	0.610036	660080	561695	663523	576296	624095	1110670	958706	653858	1259240	1233440
2027	Q9P2R3	ECHS1	Enoyl-CoA hydratase, mitochondrial	10	10	10	10	31387	41.38	215.533	Metabolism > Lipid metabolism > Fatty acid oxidation | Metabolism > Amino acid metabolism > Branched-chain amino acid metabolism | Metabolism > Amino acid metabolism > Lysine metabolism	Carbamidomethylation; Deamidation (NQ)	Homo sapiens	Tmito	0.00602932	0.495199	1.52354	0.607428	5142210	4196330	5355700	3122110	6618810	5781240	6592680	6758990	8133900	6180280
2620	Q9HCJ1	DNAJA1	DnaJ homolog subfamily A member 1	13	13	13	13	44868	39.8	227.99	N/A	Carbamidomethylation; Deamidation (NQ)	Homo sapiens	N/A	0.0432723	0.681721	1.50996	0.59451	6134850	3136810	4345540	3507160	5058010	6710320	4542530	6177100	6829260	9152740
1775	Q8IZ07	FN1	Fibronectin	192	190	192	190	272320	74.97	705.437	N/A	Carbamidomethylation; Deamidation (NQ); Oxidation (M)	Homo sapiens	N/A	0.0252751	0.681721	1.49711	0.582176	25200000000	18600000000	15400000000	20900000000	36300000000	24300000000	40600000000	28600000000	30100000000	21400000000
2224	Q9NQW6	HSPA9	Stress-70 protein, mitochondrial	35	35	35	35	73680	53.9	317.859	Metabolism > Metals and cofactors > Fe-S cluster biosynthesis	Carbamidomethylation; Deamidation (NQ); Oxidation (M)	Homo sapiens	Tmito	0.0271767	0.681721	1.41618	0.502009	49600000	25500000	26500000	30800000	48700000	38300000	48500000	46500000	44800000	44900000
1692	Q9NW15	PAFAH1B3	Platelet-activating factor acetylhydrolase IB subunit alpha1	3	3	3	3	25734	11.26	81.0914	N/A	Carbamidomethylation	Homo sapiens	N/A	0.0207926	0.681721	1.39113	0.476262	716523	552144	582611	584449	610108	1035370	1071960	854719	790213	783578
450	Q4KMQ2	SULT1E1	Sulfotransferase 1E1	1	1	1	1	35126	3.4	61.4679	N/A	N/A	Homo sapiens	N/A	0.0408806	0.681721	0.74985	-0.415326	215624	180434	239333	155178	133628	174528	108471	160685	142626	168409
945	P39687	HBD	Hemoglobin subunit delta	2	2	1	1	16055	6.12	93.1944	N/A	Deamidation (NQ)	Homo sapiens	N/A	0.0357357	0.681721	0.711731	-0.490595	33200000	50900000	58200000	55300000	32600000	30100000	27600000	39400000	34800000	44400000
1246	Q92688	SERPINC1	Antithrombin-III	10	10	10	10	52602	11.85	174.588	N/A	N/A	Homo sapiens	N/A	0.00604088	0.495199	0.678454	-0.559676	27700000	27300000	32300000	32500000	20700000	20400000	15100000	27600000	19500000	20100000
1750	Q9BTT0	CACYBP	Calcyclin-binding protein	9	9	8	8	26210	36.4	163.344	N/A	Carbamidomethylation	Homo sapiens	N/A	0.0344025	0.681721	0.632469	-0.660933	2044000	4215420	2865150	2005710	1152950	1659070	1758830	1874710	1551760	2278690
24	P15144	NRDC	Nardilysin	4	4	4	4	131701	3.65	95.6622	Protein import, sorting and homeostasis > Protein homeostasis > Chaperones | Protein import, sorting and homeostasis > Protein import and sorting	Carbamidomethylation	Homo sapiens	Tpossible_mito	0.0455132	0.681721	0.594493	-0.750267	565058	306289	271372	309772	139218	216568	143181	293347	193483	316177
1108	Q9H6X2	TSPO	Translocator protein	2	2	2	2	18828	18.34	103.876	Metabolism > Lipid metabolism > Cholesterol, bile acid, steroid synthesis	Carbamidomethylation; Oxidation (M)	Homo sapiens	Tmito	0.0462534	0.681721	0.563317	-0.82798	12200000	5938760	12900000	11900000	7446890	3682250	3485200	8590870	6372200	7164140
1407	P58335	SAR1B	GTP-binding protein SAR1b	5	5	2	2	22410	15.66	142.083	N/A	Carbamidomethylation; Deamidation (NQ)	Homo sapiens	N/A	0.0114016	0.56774	0.552187	-0.856771	1034270	1410670	1489260	1410420	442631	816505	529436	887348	874524	1024240
161	P04083	PFKP	ATP-dependent 6-phosphofructokinase, platelet type	24	24	21	21	85596	31.38	284.465	N/A	Carbamidomethylation; Deamidation (NQ); Oxidation (M)	Homo sapiens	N/A	0.00414346	0.471501	0.545091	-0.87543	12900000	8019580	7756870	10100000	4784000	6866820	4479600	6007350	3604030	6007320
344	P50995	RPL8	60S ribosomal protein L8	8	7	8	7	28025	29.18	178.016	N/A	Carbamidomethylation; Deamidation (NQ)	Homo sapiens	N/A	0.000791885	0.269637	0.508772	-0.974909	6445250	7486090	7727570	6809750	4824760	3762720	4419680	3548250	2423160	3216460
2105	P27216	CCDC6	Coiled-coil domain-containing protein 6	4	4	4	4	53291	11.39	111.71	N/A	Deamidation (NQ)	Homo sapiens	N/A	0.0450798	0.681721	0.502045	-0.994111	142028	287276	284508	241607	104486	115136	72134.5	105628	84599.5	306700
55	P07355	ARF5	ADP-ribosylation factor 5	10	9	3	2	20530	10	208.026	0	N/A	Homo sapiens	Tnon_mito	0.0376496	0.681721	0.498919	-1.00312	795972	1441010	343243	1227990	385862	403559	451566	543363	281046	482831
1546	P12429	NCL	Nucleolin	23	23	23	23	76614	32.54	251.332	N/A	Deamidation (NQ); Oxidation (M)	Homo sapiens	N/A	0.0312015	0.681721	0.466012	-1.10156	4407240	9885720	11000000	19700000	3573930	4854230	4648780	3780730	3698400	8331760
214	P09525	DGKE	Diacylglycerol kinase epsilon	1	1	1	1	63927	1.06	42.7593	N/A	Deamidation (NQ)	Homo sapiens	N/A	0.0320207	0.681721	0.461994	-1.11405	146925	78302.5	59918	230261	52576.4	76340.5	29563.3	41858.5	58318	67128.5
78	P08758	ATP2B4	Plasma membrane calcium-transporting ATPase 4	53	52	35	34	137920	30.78	378.308	N/A	Carbamidomethylation; Deamidation (NQ); Oxidation (M)	Homo sapiens	N/A	0.0128552	0.574057	0.455844	-1.13339	39700000	71800000	74700000	49600000	19300000	29700000	16100000	25300000	24200000	54500000
46	P08133	ASS1	Argininosuccinate synthase	14	14	14	14	46530	43.45	209.171	N/A	Carbamidomethylation; Deamidation (NQ)	Homo sapiens	N/A	0.00174249	0.470999	0.451374	-1.14761	5839940	3964580	3632290	3048190	1888420	2865670	1340980	1885460	1703820	1488920
386	P20073	NUDC	Nuclear migration protein nudC	7	6	7	6	38243	19.64	135.311	N/A	N/A	Homo sapiens	N/A	0.0422497	0.681721	0.448596	-1.15651	1547440	1937100	2285670	6337890	1932690	1186450	531890	1523360	1184400	1059710
1113	P13928	UBR4	E3 ubiquitin-protein ligase UBR4	15	14	15	14	573841	3.74	177.951	N/A	Carbamidomethylation	Homo sapiens	N/A	0.046215	0.681721	0.442734	-1.17549	1168720	2177270	453385	674727	417261	952196	329565	375712	289022	363767
2361	P19801	C5	Complement C5	6	6	6	6	188305	3.4	143.332	N/A	Carbamidomethylation; Deamidation (NQ)	Homo sapiens	N/A	0.0172646	0.627051	0.431161	-1.2137	8252800	2209790	6595160	5158120	2612690	1771780	1712770	3584730	1504490	2321650
2345	Q16853	CCN1	CCN family member 1	10	9	10	9	42027	27.82	176.995	N/A	Carbamidomethylation	Homo sapiens	N/A	0.00048344	0.201872	0.427727	-1.22524	1086310	1828830	1431910	1073640	425165	519700	520205	776247	529478	691866
360	Q10567	ST13	Hsc70-interacting protein	8	8	8	8	41332	24.93	201.609	N/A	Carbamidomethylation; Deamidation (NQ); Oxidation (M)	Homo sapiens	N/A	0.039938	0.681721	0.423543	-1.23942	5776520	21400000	22200000	14700000	3742400	6642230	3995010	5631300	5768360	14500000
1489	O43747	SLC16A3	Monocarboxylate transporter 4	10	10	10	10	49469	22.15	211.234	N/A	Carbamidomethylation; Deamidation (NQ); Oxidation (M)	Homo sapiens	N/A	0.000399108	0.201872	0.417904	-1.25876	29400000	31500000	18700000	22300000	11500000	14600000	8125310	8138520	10100000	11400000
1548	Q9BXS5	USO1	General vesicular transport factor p115	28	28	28	28	107895	35.65	309.629	N/A	Carbamidomethylation; Deamidation (NQ); Oxidation (M)	Homo sapiens	N/A	0.049948	0.681721	0.393014	-1.34735	5026600	16900000	11400000	10100000	2975050	3855950	1990680	3021480	3490770	14800000
3061	P61966	UBE2H	Ubiquitin-conjugating enzyme E2 H	4	3	4	3	20655	21.86	133.709	N/A	N/A	Homo sapiens	N/A	0.0340734	0.681721	0.390343	-1.35719	271136	1047930	1044250	553605	250313	187908	192978	166186	225030	693721
3114	P56377	PDAP1	28 kDa heat- and acid-stable phosphoprotein	5	5	5	5	20630	22.65	138.156	N/A	N/A	Homo sapiens	N/A	0.0114279	0.56774	0.38195	-1.38854	218586	427153	748155	416237	120846	180430	126684	163171	101420	336760
180	O95782	ASPN	Asporin	4	4	4	4	43417	10.26	118.304	N/A	Carbamidomethylation	Homo sapiens	N/A	0.0467654	0.681721	0.377376	-1.40593	594346	2815800	864617	1387860	1165880	456044	288941	280773	249217	764648
298	O94973	SET	Protein SET	7	7	7	7	33489	33.79	172.064	N/A	Deamidation (NQ)	Homo sapiens	N/A	0.0117211	0.56774	0.36844	-1.4405	5956180	3076060	2731110	5432490	1275200	1121950	993491	1614440	1192680	4096260
122	P63010	GPC1	Glypican-1	21	21	21	21	61680	50.18	296.255	N/A	Carbamidomethylation; Deamidation (NQ); Oxidation (M)	Homo sapiens	N/A	0.0244133	0.681721	0.328001	-1.60823	8327980	30000000	25500000	5027030	3446910	2843580	3641330	4044940	5432870	9099620
528	Q96CW1	PSMA3	Proteasome subunit alpha type-3	10	10	10	10	28433	39.61	188.217	N/A	Acetylation (Protein N-term); Carbamidomethylation; Deamidation (NQ); Oxidation (M)	Homo sapiens	N/A	0.00299172	0.470999	0.316013	-1.66195	4569810	10300000	17300000	14500000	2798070	2619550	2412980	3945190	3639930	5030960
802	O00203	ANP32A	Acidic leucine-rich nuclear phosphoprotein 32 family member A	9	8	4	4	28585	23.29	184.848	N/A	Carbamidomethylation	Homo sapiens	N/A	0.0345125	0.681721	0.312107	-1.67989	1094000	957937	795185	405218	156724	211864	107182	202307	212644	1184720
1496	O14617	NACA	Nascent polypeptide-associated complex subunit alpha, muscle-specific form	5	5	5	5	205422	2.74	166.075	N/A	Deamidation (NQ); Oxidation (M)	Homo sapiens	N/A	0.0250051	0.681721	0.300808	-1.73308	22000000	87800000	112000000	71700000	17100000	12500000	11300000	15200000	18400000	67000000
1928	Q9Y2T2	CSRP1	Cysteine and glycine-rich protein 1	7	7	7	7	20567	59.59	188.67	N/A	Carbamidomethylation; Deamidation (NQ)	Homo sapiens	N/A	0.00519492	0.495199	0.290244	-1.78466	4532980	10300000	14600000	3459720	1335930	2553820	1881890	1956020	1510190	3610170
1697	Q92572	HEBP2	Heme-binding protein 2	2	2	2	2	22875	10.24	72.6048	N/A	N/A	Homo sapiens	N/A	0.0430044	0.681721	0.288399	-1.79386	117344	702440	92026.4	854817	76939.5	121871	39333.3	93843.2	63024	137730
2418	Q7Z5R6	CLINT1	Clathrin interactor 1	3	3	3	3	68259	6.08	91.6394	N/A	N/A	Homo sapiens	N/A	0.00646191	0.495199	0.254139	-1.97631	284335	725555	989579	1008450	144872	274490	65476.3	168617	169407	338383
2820	P02743	SPOCK1	Testican-1	23	23	23	23	49124	61.96	299.266	N/A	Carbamidomethylation; Deamidation (NQ); Oxidation (M)	Homo sapiens	N/A	0.0494376	0.681721	0.226094	-2.14501	2565640	34800000	36000000	4469970	1445490	1836050	1907560	1798190	2761930	9149080
1342	P13798	AHSG	Alpha-2-HS-glycoprotein	7	7	7	7	39341	11.44	183.488	N/A	Carbamidomethylation; Deamidation (NQ)	Homo sapiens	N/A	0.00326896	0.470999	0.222077	-2.17087	1270000000	5080000000	5580000000	5190000000	760000000	550000000	618000000	810000000	747000000	1960000000
2834	P27695	GAS6	Growth arrest-specific protein 6	31	31	31	31	74925	55.16	350.658	N/A	Carbamidomethylation; Deamidation (NQ); Oxidation (M)	Homo sapiens	N/A	0.0405309	0.681721	0.202309	-2.30537	12300000	102000000	33100000	51900000	8666400	5663340	2373300	4731680	6716830	58600000
147	Q06481	STC2	Stanniocalcin-2	7	7	7	7	33249	39.07	215.648	N/A	Carbamidomethylation; Deamidation (NQ); Oxidation (M)	Homo sapiens	N/A	0.00243863	0.470999	0.170442	-2.55264	1582730	8717550	6709240	4633220	843846	709128	425546	712792	567750	2113220
504	Q9HDC9	ATP6V0A1	V-type proton ATPase 116 kDa subunit a 1	7	7	7	7	96413	12.43	158.82	N/A	Carbamidomethylation	Homo sapiens	N/A	0.00358849	0.471501	0.163101	-2.61616	1075890	8523560	8418410	7112620	635324	734287	454083	944254	824792	1468210
1992	P02647	LTBP2	Latent-transforming growth factor beta-binding protein 2	5	5	5	5	195052	3.08	101.755	N/A	Carbamidomethylation	Homo sapiens	N/A	0.0087376	0.549003	0.158419	-2.65819	481767	492767	723494	297259	50011.9	65666.8	168344	57495.6	17836.4	321627
1889	P06727	IGF2	Insulin-like growth factor II	3	3	3	3	20140	15	139.446	N/A	Carbamidomethylation	Homo sapiens	N/A	0.0211341	0.681721	0.150152	-2.7355	569032	9234180	8722540	4301370	486926	472046	200460	434344	654558	2421670
311	P04114	F9	Coagulation factor IX	10	10	8	8	51778	19.52	179.408	N/A	Carbamidomethylation; Deamidation (NQ); Oxidation (M)	Homo sapiens	N/A	0.0207169	0.681721	0.137957	-2.85771	6757050	62000000	34100000	20100000	2806610	1897160	1323540	2788470	1787380	30200000
2811	P02656	PROS1	Vitamin K-dependent protein S	11	11	11	11	75123	15.38	184.357	N/A	Carbamidomethylation; Deamidation (NQ); Oxidation (M)	Homo sapiens	N/A	0.0394915	0.681721	0.118513	-3.07689	2205090	43500000	30100000	25600000	864886	1477600	733584	2137120	1044710	26600000
2629	P05090	DSC1	Desmocollin-1	3	3	3	3	99987	4.03	95.0067	N/A	Carbamidomethylation	Homo sapiens	N/A	0.0492434	0.681721	0.0939322	-3.41224	12200000	6650690	553110	35900000	814242	8612610	231716	483904	444804	127003
1202	P02649	SPARCL1	SPARC-like protein 1	5	5	5	5	75208	6.63	150.566	N/A	Carbamidomethylation; Oxidation (M)	Homo sapiens	N/A	0.0250054	0.681721	0.0686741	-3.86409	1150020	16500000	23600000	12300000	552226	647921	139083	392797	185911	11800000
1758	P02749	LSM12	Protein LSM12	1	1	1	1	21701	4.62	44.5532	N/A	N/A	Homo sapiens	N/A	0.0299125	0.681721	0.000992094	-9.97723	41954.5	45410	17960.9	16834.9	0	0	22185	0	0	18791.6
1352	Q9BQE5	MBLAC2	Acyl-coenzyme A thioesterase MBLAC2	3	2	3	2	31372	9.68	86.1265	N/A	N/A	Homo sapiens	N/A	0.0219855	0.681721	0.000468361	-11.0601	124641	27195.8	99000.6	50574.1	25717.9	28696.9	0	0	0	0
1513	O95445	SAFB	Scaffold attachment factor B1	1	1	1	1	102642	2.3	48.4939	N/A	N/A	Homo sapiens	N/A	0.00529877	0.495199	0.000390436	-11.3226	0	36452.7	44248.6	26679.3	0	0	0	0	0	0
151	P05067	AOC3	Membrane primary amine oxidase	2	1	2	1	84622	1.18	68.9693	N/A	N/A	Homo sapiens	N/A	0.00535757	0.495199	0.000279494	-11.8049	34179.5	0	93110.6	51492.5	0	0	0	0	0	0
2644	Q9UKG1	DTD1	D-aminoacyl-tRNA deacylase 1	1	1	1	1	23424	7.18	47.833	N/A	N/A	Homo sapiens	N/A	0.022147	0.681721	0.000252328	-11.9524	693593	163340	43884.3	102039	19769.7	0	149177	0	0	0
393	Q8NEU8	HSP90AB4P	Putative heat shock protein HSP 90-beta 4	7	7	1	1	58264	2.18	183.368	N/A	N/A	Homo sapiens	N/A	0.00541475	0.495199	0.000219622	-12.1527	0	67458.5	40898.9	155792	0	0	0	0	0	0
1132	P07741	IGFBP1	Insulin-like growth factor-binding protein 1	1	1	1	1	27904	3.09	53.5867	N/A	Carbamidomethylation	Homo sapiens	N/A	0.0259554	0.681721	0.000161108	-12.5997	167971	289837	698059	447616	0	0	0	120103	0	273161
