# Supplementary material for: Large extracellular vesicles containing mitochondria (EVMs) derived from Alzheimer’s disease cells harbor pathologic functional and molecular profiles and spread mitochondrial dysfunctions
Source: Research Square preprint supplement (doi:10.21203/rs.3.rs-5932075/v1), 2025-02-13
Supplement: Supplementary file 8 [file f4cd8c264bb7f7cd31562d82.xlsx]

## Sheet: Heatmap AD-MCIvsAD-D prot MITO
Up-regulated	Down-regulated																			AD	AD	AD	AD	MCI	MCI	MCI	MCI	MCI	MCI
Protein Group	Accession	Gene	Description	Taxonomia	Avg. Mass	#Peptides DB	#Peptides LFQ	#Unique DB	#Unique LFQ	-10LgP	Coverage (%)	MitoPathway	PTM	Submitolocalization	Training Data set	p-value	q-value	Fold change	Log2(FC)	AD-117 Area	AD-119 Area	AD-88 Area	AD-99 Area	MCI-027 Area	MCI-042 Area	MCI-058 Area	MCI-064 Area	MCI-73 Area	MCI-82 Area
581	P49448	GLUD2	Glutamate dehydrogenase 2, mitochondrial	Homo sapiens	61434	17	17	1	1	237.74	2.33	Metabolism > Amino acid metabolism > Glutamate metabolism | Metabolism > Amino acid metabolism > GABA metabolism	N/A	Matrix	Tpossible_mito	5.11771e-10	1.34596e-07	10117.2	13.3045	0	0	0	0	12.7384	12.1778	13.7747	13.4795	14.2868	13.3701
701	P12235	SLC25A4	ADP/ATP translocase 1	Homo sapiens	33064	12	12	1	1	240.075	3.02	Metabolism > Nucleotide metabolism > Nucleotide import | Signaling > Calcium homeostasis > Mitochondrial permeability transition pore | Small molecule transport > SLC25A family	N/A	MIM	Tmito	0.0489283	0.438684	276.844	8.11293	0	14.9243	0	15.6229	15.1808	15.4313	15.5808	16.6552	15.7908	15.8595
1877	Q16795	NDUFA9	NADH dehydrogenase [ubiquinone] 1 alpha subcomplex subunit 9, mitochondrial	Homo sapiens	42510	3	3	3	3	84.1832	13	OXPHOS > Complex I > CI subunits | OXPHOS > OXPHOS subunits	N/A	MIM	Tmito	0.021935	0.438684	2.98828	1.57932	15.8287	17.1414	16.8867	15.1819	18.4047	18.2209	16.3341	18.3959	18.2831	17.3952
2368	O95169	NDUFB8	NADH dehydrogenase [ubiquinone] 1 beta subcomplex subunit 8, mitochondrial	Homo sapiens	21766	2	2	2	2	74.1608	12.37	OXPHOS > Complex I > CI subunits | OXPHOS > OXPHOS subunits	N/A	MIM	Tmito	0.00170029	0.223588	2.48377	1.31253	16.6744	17.2816	16.3324	17.0436	17.9065	17.4734	18.0599	18.7901	18.4473	18.196
864	Q5JRX3	PITRM1	Presequence protease, mitochondrial	Homo sapiens	117413	12	11	12	11	200.625	14.46	Protein import, sorting and homeostasis > Protein homeostasis > Proteases	Carbamidomethylation	Matrix	Tmito	0.0218704	0.438684	2.30423	1.20429	18.1762	19.0981	17.7761	19.534	19.4209	19.8595	19.1797	20.7051	20.1846	19.7526
2479	O96000	NDUFB10	NADH dehydrogenase [ubiquinone] 1 beta subcomplex subunit 10	Homo sapiens	20777	1	1	1	1	62.1388	8.14	OXPHOS > Complex I > CI subunits | OXPHOS > OXPHOS subunits	N/A	MIM	Tmito	0.00577319	0.304575	2.27103	1.18334	17.4675	18.1217	16.8368	18.1474	18.4007	18.7301	18.7553	19.3611	19.2326	18.4802
2424	P35270	SPR	Sepiapterin reductase	Homo sapiens	28048	2	2	2	2	131.856	13.03	Metabolism > Metals and cofactors > Tetrahydrobiopterin synthesis	N/A	unknown	Tpossible_mito	0.0305984	0.438684	2.12736	1.08907	15.4366	16.6871	15.7764	15.5925	16.7935	16.6532	15.8565	17.2561	17.8407	17.3732
505	Q13162	PRDX4	Peroxiredoxin-4	Homo sapiens	30540	14	14	11	11	266.001	57.56	Metabolism > Detoxification > ROS and glutathione metabolism	Carbamidomethylation; Deamidation (NQ)	IMS	Tmito	0.00266821	0.233913	1.96764	0.97647	22.5877	22.7731	22.9215	22.4592	23.3511	23.0691	23.5522	24.1719	23.7995	24.0275
1759	P10515	DLAT	Dihydrolipoyllysine-residue acetyltransferase component of pyruvate dehydrogenase complex, mitochondrial	Homo sapiens	68997	4	4	4	4	108.953	7.11	Metabolism > Carbohydrate metabolism > Pyruvate metabolism	Carbamidomethylation	Matrix	Tmito	0.0419785	0.438684	1.95089	0.964135	16.8853	18.2379	17.0402	18.337	18.392	18.5985	17.683	18.8394	18.9793	19.0431
1831	P51970	NDUFA8	NADH dehydrogenase [ubiquinone] 1 alpha subcomplex subunit 8	Homo sapiens	20105	4	4	4	4	106.771	25.58	OXPHOS > Complex I > CI subunits | OXPHOS > OXPHOS subunits	Carbamidomethylation	MIM	Tmito	0.0238951	0.438684	1.86318	0.897771	18.0367	18.4398	17.8229	18.3609	18.9286	18.5476	18.9439	19.9217	19.6154	18.42
852	Q9Y6C9	MTCH2	Mitochondrial carrier homolog 2	Homo sapiens	33331	9	9	9	9	201.219	39.6	Small molecule transport > SLC25A family | Mitochondrial dynamics and surveillance > Fusion	Carbamidomethylation; Deamidation (NQ)	MOM	Tmito	0.033856	0.438684	1.83983	0.879573	20.0847	21.3411	20.8573	20.7842	21.8346	21.6404	20.5676	21.9037	21.9567	21.9755
1199	Q9NX63	CHCHD3	MICOS complex subunit MIC19	Homo sapiens	26152	8	8	8	8	182.411	35.24	Mitochondrial dynamics and surveillance > Cristae formation > MICOS complex | Mitochondrial dynamics and surveillance > Intramitochondrial membrane interactions	Carbamidomethylation	MIM	Tmito	0.018068	0.438684	1.80789	0.854308	19.5079	19.8248	19.1202	19.9658	20.3093	20.2667	19.6558	20.7085	20.8529	20.9605
2608	Q3ZCQ8	TIMM50	Mitochondrial import inner membrane translocase subunit TIM50	Homo sapiens	39646	1	1	1	1	43.7814	2.83	Protein import, sorting and homeostasis > Protein import and sorting > TIM23 presequence pathway	N/A	MIM	Tmito	0.00713179	0.31261	1.75289	0.809735	14.3036	15.4305	14.9073	15.0911	15.4103	15.4875	16.0088	15.9267	15.912	15.7119
935	Q9BWM7	SFXN3	Sideroflexin-3	Homo sapiens	35503	10	9	8	8	190.321	35.51	Metabolism > Amino acid metabolism > Serine metabolism | Metabolism > Vitamin metabolism > Folate and 1-C metabolism | Small molecule transport > Sideroflexins	N/A	MIM	Tpossible_mito	0.0465325	0.438684	1.70133	0.766664	19.5541	19.73	19.2679	20.2287	20.4391	19.8005	21.3973	20.7039	20.0444	20.3858
1114	O14880	MGST3	Microsomal glutathione S-transferase 3	Homo sapiens	16516	5	5	5	5	185.263	34.21	Metabolism > Lipid metabolism > Eicosanoid metabolism	Carbamidomethylation; Deamidation (NQ); Oxidation (M)	MOM	Tmito	0.0328771	0.438684	1.69289	0.759488	19.9609	20.7735	20.8034	20.0811	21.2763	20.877	20.4065	21.6032	21.1992	21.6232
168	P00387	CYB5R3	NADH-cytochrome b5 reductase 3	Homo sapiens	34235	21	20	21	20	341.205	78.74	Metabolism > Detoxification > Xenobiotic metabolism | Metabolism > Detoxification > Amidoxime reducing complex | Metabolism > Lipid metabolism	Carbamidomethylation; Deamidation (NQ); Oxidation (M)	MOM	Tmito	0.037955	0.438684	1.69103	0.757905	24.4488	25.4298	24.7234	25.2317	25.0813	25.9473	25.2133	25.6595	26.2002	26.1965
1551	P08559	PDHA1	Pyruvate dehydrogenase E1 component subunit alpha, somatic form, mitochondrial	Homo sapiens	43296	5	4	5	4	109.823	9.49	Metabolism > Carbohydrate metabolism > Pyruvate metabolism	N/A	Matrix	Tmito	0.0375422	0.438684	1.67686	0.745762	16.6693	17.7626	17.7184	17.7216	17.8941	17.8677	18.0294	18.9539	18.4438	18.0939
512	P12236	SLC25A6	ADP/ATP translocase 3	Homo sapiens	32866	16	14	3	3	265.36	9.4	Metabolism > Nucleotide metabolism > Nucleotide import | Signaling > Calcium homeostasis > Mitochondrial permeability transition pore | Small molecule transport > SLC25A family	Acetylation (Protein N-term)	MIM	Tmito	0.00579041	0.304575	1.67383	0.743149	20.5894	20.924	20.6026	20.8861	21.7311	21.8069	20.9402	21.7255	21.129	21.6293
2272	O75251	NDUFS7	NADH dehydrogenase [ubiquinone] iron-sulfur protein 7, mitochondrial	Homo sapiens	23564	2	2	2	2	74.513	10.8	OXPHOS > Complex I > CI subunits | Metabolism > Metals and cofactors > Fe-S-containing proteins | OXPHOS > OXPHOS subunits	Oxidation (M)	MIM	Tmito	0.0143558	0.419509	1.56858	0.64946	16.6199	16.488	16.6438	17.3836	17.3953	17.592	17.3515	17.8588	17.2989	17.1032
1618	P11177	PDHB	Pyruvate dehydrogenase E1 component subunit beta, mitochondrial	Homo sapiens	39233	5	5	5	5	137.852	17.27	Metabolism > Carbohydrate metabolism > Pyruvate metabolism	Oxidation (M)	Matrix	Tmito	0.0142787	0.419509	1.56007	0.641611	18.5369	19.2156	18.6475	18.8601	19.4024	19.2179	18.9545	19.7793	19.5993	19.7864
1829	O00154	ACOT7	Cytosolic acyl coenzyme A thioester hydrolase	Homo sapiens	41796	4	3	4	3	123.211	10.26	Metabolism > Lipid metabolism	Oxidation (M)	Matrix	Tpossible_mito	0.0498001	0.438684	1.52791	0.611555	18.3705	18.6807	18.3529	18.8297	18.9732	19.9625	18.9569	19.4815	18.5667	19.0794
292	Q16891	IMMT	MICOS complex subunit MIC60	Homo sapiens	83678	27	27	27	27	244.343	39.97	Mitochondrial dynamics and surveillance > Cristae formation > MICOS complex	N/A	MIM	Tmito	0.0381679	0.438684	1.49607	0.58118	21.8972	22.4873	22.0562	22.0116	22.698	22.2925	22.1787	22.6962	23.0713	23.2287
1099	Q00325	SLC25A3	Phosphate carrier protein, mitochondrial	Homo sapiens	40095	9	9	9	9	169.305	19.61	Metabolism > Metals and cofactors > Copper metabolism | Signaling > Calcium homeostasis > Calcium cycle | Small molecule transport > SLC25A family	Oxidation (M)	MIM	Tmito	0.0401551	0.438684	1.461	0.546958	21.6192	22.3452	22.2104	22.4844	22.6835	22.903	22.1171	22.9219	22.6415	23.0037
1257	P24539	ATP5PB	ATP synthase F(0) complex subunit B1, mitochondrial	Homo sapiens	28909	7	7	7	7	170.353	29.3	OXPHOS > Complex V > CV subunits | OXPHOS > OXPHOS subunits	N/A	MIM	Tmito	0.0456222	0.438684	1.41838	0.504241	19.9818	20.2904	19.91	20.6594	20.705	20.6312	20.1848	20.8197	20.7619	21.1853
1120	Q9UIJ7	AK3	GTP:AMP phosphotransferase AK3, mitochondrial	Homo sapiens	25565	7	7	7	7	153.833	37.89	Metabolism > Nucleotide metabolism > Nucleotide synthesis and processing	Deamidation (NQ)	Matrix	Tmito	0.010353	0.388976	0.0621432	-4.00826	24.8528	25.6403	26.2979	19.7581	19.5034	20.3641	19.6006	20.1096	20.5777	20.6187
